# Supplementary material for: Crontonylation regulatory factor DPF2 promotes the occurrence of hepatocellular carcinoma by regulating glycosphingolipid metabolism
Source: Research Square preprint supplement (doi:10.21203/rs.3.rs-6627218/v1), 2025-06-02
Supplement: Supplementary file 1 [file 3dd73317a1da419a5de94372.xlsx]

## Sheet: Supplementary Table S1
Characteristics of significant SNPs with genome-wide associations (P<5×10-8) for DPF2 on Hepatocellular carcinoma
SNP	effect_allele.exposure	other_allele.exposure	effect_allele.outcome	other_allele.outcome	beta.exposure	beta.outcome	eaf.exposure	eaf.outcome	remove	palindromic	ambiguous	id.outcome	pos.outcome	pval.outcome	se.outcome	outcome	mr_keep.outcome	pval_origin.outcome	data_source.outcome	samplesize.outcome	chr.exposure	pos.exposure	gene.exposure	pval.exposure	samplesize.exposure	se.exposure	exposure	mr_keep.exposure	pval_origin.exposure	id.exposure	data_source.exposure	action	SNP_index	mr_keep	R2	f	meanf	units.outcome	units.exposure	rsq.exposure	effective_n.exposure	rsq.outcome	effective_n.outcome	steiger_dir	steiger_pval
rs1078457	T	C	T	C	-0.0653946	-0.051418	0.199425006576722	0.1824	FALSE	FALSE	FALSE	Q5H87c	65612653	0.490304	0.0745377	outcome	TRUE	reported	textfile	43456	11	65380124	DPF2	4.781e-11	31684	0.00994200969041249	exposure	TRUE	reported	96zvpY	textfile	2	1	TRUE	0.00136364801703067	43.2620907398157	127.607541254037	NA	NA	0.00136373398309114	31684	1.09507501083415e-05	43456	TRUE	5.28797168595198e-06
rs10791813	G	C	G	C	0.0437792166689973	-0.0373957	0.435416902578039	0.443045	FALSE	TRUE	TRUE	Q5H87c	65097789	0.521004	0.0582669	outcome	TRUE	reported	textfile	43456	11	64865261	DPF2	4.9249e-08	31568	0.00802684524834478	exposure	TRUE	reported	96zvpY	textfile	2	1	FALSE	0.000941434419843351	29.7453221668925	127.607541254037	NA	NA	0.000941494012320382	31568	9.47906785034204e-06	43456	TRUE	0.000188499011459009
rs111295021	A	C	A	C	0.0899297425264563	-0.14385	0.0908027883966719	0.160509	FALSE	FALSE	FALSE	Q5H87c	65483934	0.0703331	0.0794854	outcome	TRUE	reported	textfile	43456	11	65251405	DPF2	1.5526e-09	27310	0.0148917422918837	exposure	TRUE	reported	96zvpY	textfile	2	1	TRUE	0.00133356573844614	36.4656425169782	127.607541254037	NA	NA	0.00133366327669213	27310	7.5367222648093e-05	43456	TRUE	0.000309820204247096
rs1144924	T	C	T	C	-0.129446	-0.0562648	0.819872783346184	0.181011	FALSE	FALSE	FALSE	Q5H87c	65436090	0.458663	0.0759258	outcome	TRUE	reported	textfile	43456	11	65203561	DPF2	2.9752e-35	31015	0.0104480731701604	exposure	TRUE	reported	96zvpY	textfile	2	1	TRUE	0.00492483474267193	153.489811832443	127.607541254037	NA	NA	0.00492515077654089	31015	1.26374531122471e-05	43456	TRUE	2.75446425245368e-19
rs117789850	T	C	T	C	-0.101189	0.188429	0.942533303057826	0.0427402	FALSE	FALSE	FALSE	Q5H87c	65447931	0.186543	0.142654	outcome	TRUE	reported	textfile	43456	11	65215402	DPF2	3.4004e-09	31499	0.017119069260196	exposure	TRUE	reported	96zvpY	textfile	2	1	TRUE	0.00110797255932383	34.9365204069519	127.607541254037	NA	NA	0.00110804283553289	31499	4.01495222707149e-05	43456	TRUE	0.000268901293761436
rs12417665	T	C	T	C	0.122923688868673	0.194512	0.143835353690348	0.0883366	FALSE	FALSE	FALSE	Q5H87c	65396886	0.0547747	0.101273	outcome	TRUE	reported	textfile	43456	11	65164357	DPF2	5.0035e-27	31143	0.011418086038871	exposure	TRUE	reported	96zvpY	textfile	2	1	TRUE	0.00370775348430966	115.892853385835	127.607541254037	NA	NA	0.00370799072814696	31143	8.48865378352049e-05	43456	TRUE	3.15492561891634e-12
rs149948945	T	G	T	G	-0.169567	-0.0927392	0.0365952284674484	0.0860195	FALSE	FALSE	FALSE	Q5H87c	65251261	0.380275	0.105699	outcome	TRUE	reported	textfile	43456	11	65018732	DPF2	3.617e-08	14967	0.0307822949325009	exposure	TRUE	reported	96zvpY	textfile	2	1	TRUE	0.00202333643852885	30.3406190827419	127.607541254037	NA	NA	0.00202360630047368	14967	1.77152579157683e-05	43456	TRUE	1.6688032800084e-05
rs186869143	A	G	A	G	-0.401271	-0.0731508	0.0265486725663717	0.0384441	FALSE	FALSE	FALSE	Q5H87c	65588320	0.625801	0.150008	outcome	TRUE	reported	textfile	43456	11	65355791	DPF2	1.5603e-08	3842	0.070962318337875	exposure	TRUE	reported	96zvpY	textfile	2	1	TRUE	0.00825395798185474	31.9589867843832	127.607541254037	NA	NA	0.00825822141673458	3842	5.47239177969698e-06	43456	TRUE	1.34070183881013e-07
rs2271448	T	C	T	C	0.0606954314070514	-0.068272	0.325246185071037	0.310164	FALSE	FALSE	FALSE	Q5H87c	65209953	0.278455	0.0629933	outcome	TRUE	reported	textfile	43456	11	64977424	DPF2	8.2342e-13	31681	0.00848021340548131	exposure	TRUE	reported	96zvpY	textfile	2	1	TRUE	0.00161435071612055	51.2237093678833	127.607541254037	NA	NA	0.0016144524708744	31681	2.70305592642706e-05	43456	TRUE	2.15996504142546e-06
rs500464	G	A	G	A	-0.121266	0.126401	0.922394678492239	0.0573194	FALSE	FALSE	FALSE	Q5H87c	65026488	0.301323	0.122292	outcome	TRUE	reported	textfile	43456	11	64793960	DPF2	3.1511e-16	31684	0.0148477571034593	exposure	TRUE	reported	96zvpY	textfile	2	1	TRUE	0.00210089160957776	66.7005786607049	127.607541254037	NA	NA	0.0021010239546056	31684	2.45846758908462e-05	43456	TRUE	3.06493452547264e-08
rs56205242	A	G	A	G	0.172905572353062	0.0440092	0.10460124029663	0.0950325	FALSE	FALSE	FALSE	Q5H87c	65310180	0.657183	0.099163	outcome	TRUE	reported	textfile	43456	11	65077651	DPF2	3.8759e-36	28134	0.0137750314571316	exposure	TRUE	reported	96zvpY	textfile	2	1	TRUE	0.005568983861649	157.544014067752	127.607541254037	NA	NA	0.00556937757472221	28134	4.53268882596484e-06	43456	TRUE	2.26540096757916e-21
rs566908	T	C	T	C	0.105573316705821	0.0443976	0.457745149845248	0.456179	FALSE	FALSE	FALSE	Q5H87c	65069898	0.447896	0.0585004	outcome	TRUE	reported	textfile	43456	11	64837370	DPF2	7.0561e-40	31569	0.00798805398639725	exposure	TRUE	reported	96zvpY	textfile	2	1	TRUE	0.00550261551963827	174.662162836338	127.607541254037	NA	NA	0.00550296223201729	31569	1.32545748058942e-05	43456	TRUE	1.21339970769782e-21
rs629710	A	C	A	C	-0.286303	-0.0839202	0.740101843445308	0.280968	FALSE	FALSE	FALSE	Q5H87c	65341762	0.194275	0.0646518	outcome	TRUE	reported	textfile	43456	11	65109233	DPF2	1e-200	30408	0.00924578374710192	exposure	TRUE	reported	96zvpY	textfile	2	1	TRUE	0.0305698477538163	958.817701975595	127.607541254037	NA	NA	0.0305717970580702	30408	3.87726227672087e-05	43456	TRUE	5.10233591608474e-115
rs658794	T	G	T	G	0.0874474678796026	0.0945939	0.0856532493816056	0.159614	FALSE	FALSE	FALSE	Q5H87c	65353732	0.241064	0.0806887	outcome	TRUE	reported	textfile	43456	11	65121203	DPF2	1.069e-08	27310	0.0152896226666438	exposure	TRUE	reported	96zvpY	textfile	2	1	TRUE	0.00119635305066583	32.7091407879488	127.607541254037	NA	NA	0.00119644056507079	27310	3.16269513129428e-05	43456	TRUE	0.000174934429980042
rs675671	G	A	G	A	-0.232143	-0.0973265	0.100076103500761	0.225317	FALSE	FALSE	FALSE	Q5H87c	65259685	0.162723	0.0697196	outcome	TRUE	reported	textfile	43456	11	65027156	DPF2	2.009e-57	26280	0.0145346385400426	exposure	TRUE	reported	96zvpY	textfile	2	1	TRUE	0.0096135023808561	255.075787252184	127.607541254037	NA	NA	0.0096142270232175	26280	4.48438821053283e-05	43456	TRUE	8.87599877786536e-32
rs7114754	C	T	C	T	-0.179387	-0.0208414	0.0780375061069563	0.064054	FALSE	FALSE	FALSE	Q5H87c	65203925	0.860257	0.118385	outcome	TRUE	reported	textfile	43456	11	64971396	DPF2	9.0577e-34	31684	0.0148100553593361	exposure	TRUE	reported	96zvpY	textfile	2	1	TRUE	0.00460915399018544	146.703395256676	127.607541254037	NA	NA	0.00460944361258016	31684	7.13231229732005e-07	43456	TRUE	9.91852759724695e-20
rs71541906	A	G	A	G	-0.0699504	-0.0502744	0.134372474801174	0.139516	FALSE	FALSE	FALSE	Q5H87c	64840810	0.549126	0.0839208	outcome	TRUE	reported	textfile	43456	11	64608282	DPF2	1.1662e-08	28588	0.0122623138821015	exposure	TRUE	reported	96zvpY	textfile	2	1	TRUE	0.0011369917810386	32.5390436779943	127.607541254037	NA	NA	0.00113707123944065	28588	8.25888112507208e-06	43456	TRUE	5.0747674578429e-05
rs72932814	C	T	C	T	0.152715863002314	0.115967	0.0326419265321481	0.0243388	FALSE	FALSE	FALSE	Q5H87c	65064537	0.532704	0.18588	outcome	TRUE	reported	textfile	43456	11	64832009	DPF2	4.7243e-10	26336	0.0245204577643766	exposure	TRUE	reported	96zvpY	textfile	2	1	TRUE	0.0014706934441187	38.786283890862	127.607541254037	NA	NA	0.00147080497524507	26336	8.95715040990869e-06	43456	TRUE	5.89862102185521e-06
rs78287937	G	T	G	T	0.100493705693143	0.198577	0.0691757476837406	0.0379809	FALSE	FALSE	FALSE	Q5H87c	65005629	0.187687	0.150729	outcome	TRUE	reported	textfile	43456	11	64773101	DPF2	6.4597e-09	25906	0.0173130684284854	exposure	TRUE	reported	96zvpY	textfile	2	1	TRUE	0.00129886738685734	33.6896191367248	127.607541254037	NA	NA	0.00129896753974494	25906	3.99408357798199e-05	43456	TRUE	0.00015171630569204
Characteristics of significant SNPs with genome-wide associations (P<5×10-8) for Plasma metabolites on Hepatocellular carcinoma
Kynurenine levels
SNP	effect_allele.exposure	other_allele.exposure	effect_allele.outcome	other_allele.outcome	beta.exposure	beta.outcome	eaf.exposure	eaf.outcome	remove	palindromic	ambiguous	id.outcome	pos.outcome	pval.outcome	se.outcome	outcome	mr_keep.outcome	pval_origin.outcome	data_source.outcome	samplesize.outcome	se.exposure	pval.exposure	samplesize.exposure	exposure	mr_keep.exposure	pval_origin.exposure	id.exposure	data_source.exposure	action	SNP_index	mr_keep	R2	f	meanf	units.outcome	units.exposure	rsq.exposure	effective_n.exposure	rsq.outcome	effective_n.outcome	steiger_dir	steiger_pval
rs10216901	T	C	T	C	-0.092585	0.0168354	0.372432	0.379772	FALSE	FALSE	FALSE	xbhZLe	39947074	0.776834	0.059395	outcome	TRUE	reported	textfile	345727	0.0153069	1.4614e-09	8244	exposure	TRUE	reported	cDILu7	textfile	2	1	TRUE	0.0044182037093059	36.576437122266	63.3467584260463	NA	NA	0.00441927109063795	8244	2.32389348997082e-07	345727	TRUE	3.03437523382944e-09
rs10850034	A	T	A	T	0.0993552	-0.0613221	0.439327	0.39563	FALSE	TRUE	TRUE	xbhZLe	112379717	0.302333	0.0594526	outcome	TRUE	reported	textfile	345727	0.0149341	2.87316e-11	8244	exposure	TRUE	reported	cDILu7	textfile	2	1	FALSE	0.00534022634558043	44.2504529750552	63.3467584260463	NA	NA	0.00534151528065565	8244	3.0772318028894e-06	345727	TRUE	1.44232147213129e-10
rs3184504	C	T	C	T	-0.108142	0.023013	0.513669	0.592246	FALSE	FALSE	FALSE	xbhZLe	111446804	0.696503	0.0590007	outcome	TRUE	reported	textfile	345727	0.0148104	2.83947e-13	8244	exposure	TRUE	reported	cDILu7	textfile	2	1	TRUE	0.00642565794155686	53.3027781741937	63.3467584260463	NA	NA	0.00642720716720762	8244	4.40049133344734e-07	345727	TRUE	8.76986565624639e-13
rs4843270	A	C	A	C	0.205627	0.17286	0.265349	0.228934	FALSE	FALSE	FALSE	xbhZLe	87844466	0.0120979	0.0688884	outcome	TRUE	reported	textfile	345727	0.0165261	1.53431e-35	8244	exposure	TRUE	reported	cDILu7	textfile	2	1	TRUE	0.018433227847441	154.779754397591	63.3467584260463	NA	NA	0.0184376183747468	8244	1.82120203394388e-05	345727	TRUE	1.59499687332162e-32
rs61825638	T	C	T	C	0.130031	0.0534489	0.246402	0.234563	FALSE	FALSE	FALSE	xbhZLe	241550102	0.435912	0.0686021	outcome	TRUE	reported	textfile	345727	0.0171027	2.89497e-14	8244	exposure	TRUE	reported	cDILu7	textfile	2	1	TRUE	0.00696292837825683	57.7908492377539	63.3467584260463	NA	NA	0.00696460623176906	8244	1.75578435567248e-06	345727	TRUE	1.51501524598139e-13
rs7197772	T	C	T	C	-0.126433	-0.0828276	0.245776	0.33106	FALSE	FALSE	FALSE	xbhZLe	87784767	0.179571	0.0617159	outcome	TRUE	reported	textfile	345727	0.017404	3.74185e-13	8244	exposure	TRUE	reported	cDILu7	textfile	2	1	TRUE	0.00636082517232171	52.7615279252325	63.3467584260463	NA	NA	0.00636235886689096	8244	5.2098230603801e-06	345727	TRUE	3.24519908255711e-12
rs750950	C	A	C	A	-0.103641	-0.0800289	0.335087	0.466109	FALSE	FALSE	FALSE	xbhZLe	87839641	0.169939	0.0583131	outcome	TRUE	reported	textfile	345727	0.0156287	3.32478e-11	8244	exposure	TRUE	reported	cDILu7	textfile	2	1	TRUE	0.00530602125988586	43.9655091502321	63.3467584260463	NA	NA	0.00530730198315757	8244	5.44788942780677e-06	345727	TRUE	2.32487819044975e-10
4-guanidinobutanoate levels
SNP	effect_allele.exposure	other_allele.exposure	effect_allele.outcome	other_allele.outcome	beta.exposure	beta.outcome	eaf.exposure	eaf.outcome	remove	palindromic	ambiguous	id.outcome	pos.outcome	pval.outcome	se.outcome	outcome	mr_keep.outcome	pval_origin.outcome	data_source.outcome	samplesize.outcome	se.exposure	pval.exposure	samplesize.exposure	exposure	mr_keep.exposure	pval_origin.exposure	id.exposure	data_source.exposure	action	SNP_index	mr_keep	R2	f	meanf	units.outcome	units.exposure	rsq.exposure	effective_n.exposure	rsq.outcome	effective_n.outcome	steiger_dir	steiger_pval
rs10157704	T	C	T	C	-0.178563	-0.166616	0.47491	0.418159	FALSE	FALSE	FALSE	4wFcCg	15779419	0.0043717	0.0584613	outcome	TRUE	reported	textfile	345727	0.0148998	4.2969e-33	8144	exposure	TRUE	reported	Zu0udu	textfile	2	1	TRUE	0.0173297427587634	143.587092925734	104.795363969465	NA	NA	0.0173339258465264	8144	2.34939198240668e-05	345727	TRUE	5.37951179476117e-30
rs10927844	G	A	G	A	-0.155354	-0.0353746	0.766993	0.77751	FALSE	FALSE	FALSE	4wFcCg	15742120	0.612782	0.0698957	outcome	TRUE	reported	textfile	345727	0.0181409	1.09239e-17	8144	exposure	TRUE	reported	Zu0udu	textfile	2	1	TRUE	0.00892475055270245	73.3196788443938	104.795363969465	NA	NA	0.00892692325719507	8144	7.40885424767553e-07	345727	TRUE	5.53546908021025e-17
rs11577707	A	G	A	G	-0.216399	-0.181196	0.181038	0.147016	FALSE	FALSE	FALSE	4wFcCg	15737065	0.0295978	0.0832919	outcome	TRUE	reported	textfile	345727	0.0197732	7.09615e-28	8144	exposure	TRUE	reported	Zu0udu	textfile	2	1	TRUE	0.0144936655625047	119.742939123034	104.795363969465	NA	NA	0.0144971741717821	8144	1.36884711216685e-05	345727	TRUE	1.31215075210989e-25
rs12141308	G	T	G	T	0.268239	0.380047	0.0409957	0.0310903	FALSE	FALSE	FALSE	4wFcCg	15445050	0.0218298	0.165719	outcome	TRUE	reported	textfile	345727	0.0376687	1.07153e-12	8144	exposure	TRUE	reported	Zu0udu	textfile	2	1	TRUE	0.00618798222106152	50.6962587919619	104.795363969465	NA	NA	0.00618949282822179	8144	1.52122206967152e-05	345727	TRUE	2.34011672577219e-11
rs12737349	A	G	A	G	-0.28422	-0.0274814	0.0331553	0.0168054	FALSE	FALSE	FALSE	4wFcCg	15719219	0.904591	0.229271	outcome	TRUE	reported	textfile	345727	0.0421642	1.57522e-11	8144	exposure	TRUE	reported	Zu0udu	textfile	2	1	TRUE	0.00554839572681995	45.4270854545862	104.795363969465	NA	NA	0.00554975107035021	8144	4.15574272344358e-08	345727	TRUE	3.17907160369878e-11
rs139276747	T	C	T	C	-0.257471	-0.13965	0.0265208	0.0355092	FALSE	FALSE	FALSE	4wFcCg	15535703	0.374934	0.157393	outcome	TRUE	reported	textfile	345727	0.0466704	3.45238e-08	8144	exposure	TRUE	reported	Zu0udu	textfile	2	1	TRUE	0.00372319555468248	30.4275459098964	104.795363969465	NA	NA	0.00372410671409715	8144	2.27708519240141e-06	345727	TRUE	1.06855973368021e-07
rs140527149	C	A	C	A	-0.459947	-0.103822	0.550523	0.647568	FALSE	FALSE	FALSE	4wFcCg	15581637	0.0874762	0.0607552	outcome	TRUE	reported	textfile	345727	0.0140263	1e-200	8144	exposure	TRUE	reported	Zu0udu	textfile	2	1	TRUE	0.116635679284087	1075.0351564589	104.795363969465	NA	NA	0.116660987278631	8144	8.44651228815638e-06	345727	TRUE	1.78697454617747e-217
rs148555368	A	G	A	G	-0.276553	-0.41686	0.0248092	0.00906017	FALSE	FALSE	FALSE	4wFcCg	15521114	0.174756	0.307175	outcome	TRUE	reported	textfile	345727	0.0474243	5.49474e-09	8144	exposure	TRUE	reported	Zu0udu	textfile	2	1	TRUE	0.00415822004221749	33.9975970732721	104.795363969465	NA	NA	0.00415923721859151	8144	5.32691314551257e-06	345727	TRUE	2.79530174128664e-08
rs149590665	G	C	G	C	0.322861	-0.0372716	0.0269402	0.0296298	FALSE	TRUE	FALSE	4wFcCg	15546017	0.829039	0.172607	outcome	TRUE	reported	textfile	345727	0.0457261	1.65582e-12	8144	exposure	TRUE	reported	Zu0udu	textfile	2	1	TRUE	0.00608435594339335	49.842083065439	104.795363969465	NA	NA	0.00608584140827128	8144	1.34867845771711e-07	345727	TRUE	3.95488367785753e-12
rs150303036	A	G	A	G	-0.338149	-0.493188	0.0143422	0.00718952	FALSE	FALSE	FALSE	4wFcCg	15571339	0.147319	0.340349	outcome	TRUE	reported	textfile	345727	0.0619204	4.73408e-08	8144	exposure	TRUE	reported	Zu0udu	textfile	2	1	TRUE	0.00364857677249138	29.8154962085516	104.795363969465	NA	NA	0.00364946973770925	8144	6.07355014069711e-06	345727	TRUE	2.28603924374382e-07
rs2753299	G	A	G	A	-0.279127	-0.312351	0.938578	0.952415	FALSE	FALSE	FALSE	4wFcCg	15565125	0.0213309	0.135683	outcome	TRUE	reported	textfile	345727	0.031536	8.66792e-19	8144	exposure	TRUE	reported	Zu0udu	textfile	2	1	TRUE	0.00952785161307923	78.3220083068774	104.795363969465	NA	NA	0.00953016972891565	8144	1.53284232656965e-05	345727	TRUE	5.07350932924439e-17
rs35549389	G	A	G	A	-0.259984	-0.0552815	0.0272146	0.025876	FALSE	FALSE	FALSE	4wFcCg	15661107	0.756028	0.177925	outcome	TRUE	reported	textfile	345727	0.0456488	1.23157e-08	8144	exposure	TRUE	reported	Zu0udu	textfile	2	1	TRUE	0.00396707527663733	32.428573494548	104.795363969465	NA	NA	0.00396804588183014	8144	2.79225309925488e-07	345727	TRUE	2.43003988586157e-08
rs3765373	A	G	A	G	-0.207257	-0.221844	0.127554	0.174041	FALSE	FALSE	FALSE	4wFcCg	15442643	0.00553592	0.0799703	outcome	TRUE	reported	textfile	345727	0.0226741	6.20428e-20	8144	exposure	TRUE	reported	Zu0udu	textfile	2	1	TRUE	0.0101551805503827	83.531760147202	104.795363969465	NA	NA	0.010157649729401	8144	2.22585808764111e-05	345727	TRUE	8.09487518465675e-18
rs3820070	C	T	C	T	-0.274768	-0.10974	0.0283309	0.0344354	FALSE	FALSE	FALSE	4wFcCg	15471938	0.50014	0.162754	outcome	TRUE	reported	textfile	345727	0.0446149	7.33642e-10	8144	exposure	TRUE	reported	Zu0udu	textfile	2	1	TRUE	0.00463571519077661	37.9197783759514	104.795363969465	NA	NA	0.00463684862729863	8144	1.31502864563369e-06	345727	TRUE	2.23077529114734e-09
rs514941	G	A	G	A	-0.166522	-0.0962438	0.622167	0.656421	FALSE	FALSE	FALSE	4wFcCg	15441527	0.1154	0.0611312	outcome	TRUE	reported	textfile	345727	0.0157725	4.6761e-26	8144	exposure	TRUE	reported	Zu0udu	textfile	2	1	TRUE	0.0135020768256033	111.438561533218	104.795363969465	NA	NA	0.0135053486817983	8144	7.16944905165646e-06	345727	TRUE	2.63098152380976e-24
rs56809328	C	T	C	T	0.203863	-0.102214	0.04358	0.0348941	FALSE	FALSE	FALSE	4wFcCg	16063208	0.515453	0.157163	outcome	TRUE	reported	textfile	345727	0.036363	2.06646e-08	8144	exposure	TRUE	reported	Zu0udu	textfile	2	1	TRUE	0.00384456099463014	31.4232241200561	104.795363969465	NA	NA	0.00384550174057183	8144	1.22345734094677e-06	345727	TRUE	5.36043172295637e-08
rs61782444	G	A	G	A	-0.20946	-0.0960757	0.0774077	0.134509	FALSE	FALSE	FALSE	4wFcCg	15689087	0.26165	0.0855908	outcome	TRUE	reported	textfile	345727	0.0281787	1.05934e-13	8144	exposure	TRUE	reported	Zu0udu	textfile	2	1	TRUE	0.0067388528667233	55.2399942343651	104.795363969465	NA	NA	0.00674049704005882	8144	3.64452199312258e-06	345727	TRUE	7.59463856872661e-13
rs6659108	T	C	T	C	0.22765	0.1257	0.0807048	0.0828934	FALSE	FALSE	FALSE	4wFcCg	15751133	0.226586	0.103953	outcome	TRUE	reported	textfile	345727	0.0274187	1.01725e-16	8144	exposure	TRUE	reported	Zu0udu	textfile	2	1	TRUE	0.00839350181834381	68.9183581695689	104.795363969465	NA	NA	0.00839554628746327	8144	4.22925507236951e-06	345727	TRUE	1.13577493532957e-15
rs732653	A	C	A	C	0.13719	0.102919	0.0966294	0.0697844	FALSE	FALSE	FALSE	4wFcCg	15997590	0.364311	0.11345	outcome	TRUE	reported	textfile	345727	0.0250901	4.55368e-08	8144	exposure	TRUE	reported	Zu0udu	textfile	2	1	TRUE	0.00365772390866717	29.8905193315697	104.795363969465	NA	NA	0.00365861910436604	8144	2.38040194276442e-06	345727	TRUE	1.41415956382251e-07
rs77937534	C	A	C	A	-0.291439	0.169773	0.0389586	0.0456896	FALSE	FALSE	FALSE	4wFcCg	15544881	0.214982	0.136915	outcome	TRUE	reported	textfile	345727	0.0387272	5.25454e-14	8144	exposure	TRUE	reported	Zu0udu	textfile	2	1	TRUE	0.00690582879330431	56.6182540038098	104.795363969465	NA	NA	0.00690751342280276	8144	4.44736186424756e-06	345727	TRUE	4.44614223595773e-13
rs7969761	T	C	T	C	0.0903542	-0.0620597	0.545855	0.556456	FALSE	FALSE	FALSE	4wFcCg	246676	0.287497	0.0583472	outcome	TRUE	reported	textfile	345727	0.0151665	2.56147e-09	8144	exposure	TRUE	reported	Zu0udu	textfile	2	1	TRUE	0.00433909979650729	35.482914450032	104.795363969465	NA	NA	0.00434016102652564	8144	3.27225468276494e-06	345727	TRUE	1.04906722167142e-08
rs9442234	C	T	C	T	0.0858975	-0.150409	0.504824	0.388931	FALSE	FALSE	FALSE	4wFcCg	16064561	0.0114926	0.0595126	outcome	TRUE	reported	textfile	345727	0.0150904	1.25429e-08	8144	exposure	TRUE	reported	Zu0udu	textfile	2	1	TRUE	0.00396275623165894	32.3931273052589	104.795363969465	NA	NA	0.00396372578433705	8144	1.84752783459474e-05	345727	TRUE	1.61512397043219e-07
Butyrylglycine levels
SNP	effect_allele.exposure	other_allele.exposure	effect_allele.outcome	other_allele.outcome	beta.exposure	beta.outcome	eaf.exposure	eaf.outcome	remove	palindromic	ambiguous	id.outcome	pos.outcome	pval.outcome	se.outcome	outcome	mr_keep.outcome	pval_origin.outcome	data_source.outcome	samplesize.outcome	se.exposure	pval.exposure	samplesize.exposure	exposure	mr_keep.exposure	pval_origin.exposure	id.exposure	data_source.exposure	action	SNP_index	mr_keep	R2	f	meanf	units.outcome	units.exposure	rsq.exposure	effective_n.exposure	rsq.outcome	effective_n.outcome	steiger_dir	steiger_pval
rs1039302	T	C	T	C	-0.250329	0.0619835	0.148535	0.163409	FALSE	FALSE	FALSE	l8Uce3	120798455	0.424832	0.077667	outcome	TRUE	reported	textfile	345727	0.0250973	1.97391e-23	6044	exposure	TRUE	reported	tTiUIv	textfile	2	1	TRUE	0.0161939706953466	99.4545347627518	120.532745484539	NA	NA	0.0161992443267957	6044	1.84224567521222e-06	345727	TRUE	1.73905683787659e-22
rs1047891	A	C	A	C	0.297264	0.0496331	0.32329	0.32337	FALSE	FALSE	FALSE	l8Uce3	210675783	0.425271	0.0622507	outcome	TRUE	reported	textfile	345727	0.0190512	6.89919e-55	6044	exposure	TRUE	reported	tTiUIv	textfile	2	1	TRUE	0.0387225767338973	243.386355451148	120.532745484539	NA	NA	0.0387348980386547	6044	1.83875023014009e-06	345727	TRUE	1.38974100702845e-52
rs11611311	T	A	T	A	-0.145922	-0.0624692	0.151447	0.187199	FALSE	TRUE	FALSE	l8Uce3	120239784	0.401588	0.0744755	outcome	TRUE	reported	textfile	345727	0.025057	5.7599e-09	6044	exposure	TRUE	reported	tTiUIv	textfile	2	1	TRUE	0.00557993096345876	33.9031199499846	120.532745484539	NA	NA	0.00558176770132206	6044	2.03504194130942e-06	345727	TRUE	1.53509310337767e-08
rs13009600	A	G	A	G	0.129741	-0.000739342	0.370327	0.372556	FALSE	FALSE	FALSE	l8Uce3	210907900	0.990159	0.059943	outcome	TRUE	reported	textfile	345727	0.0187326	4.33165e-12	6044	exposure	TRUE	reported	tTiUIv	textfile	2	1	TRUE	0.00787409583253133	47.9528725339316	120.532745484539	NA	NA	0.00787668175576389	6044	4.40030744665419e-10	345727	TRUE	7.13216034538263e-12
rs140372512	A	G	A	G	0.418504	-0.0966176	0.0150678	0.0492557	FALSE	FALSE	FALSE	l8Uce3	120739099	0.488657	0.139531	outcome	TRUE	reported	textfile	345727	0.0741183	1.63812e-08	6044	exposure	TRUE	reported	tTiUIv	textfile	2	1	TRUE	0.0052473373030356	31.8716533002127	120.532745484539	NA	NA	0.00524906513941021	6044	1.38688256810229e-06	345727	TRUE	3.7631419875543e-08
rs143580996	A	C	A	C	0.239746	-0.0183255	0.057184	0.0230101	FALSE	FALSE	FALSE	l8Uce3	120423195	0.923996	0.192089	outcome	TRUE	reported	textfile	345727	0.038918	7.2621e-10	6044	exposure	TRUE	reported	tTiUIv	textfile	2	1	TRUE	0.006239631327415	37.9365626449754	120.532745484539	NA	NA	0.00624168385489639	6044	2.63254544983048e-08	345727	TRUE	1.14488360167939e-09
rs146861677	A	C	A	C	0.295841	-0.156883	0.0352794	0.0641061	FALSE	FALSE	FALSE	l8Uce3	120555612	0.197842	0.12183	outcome	TRUE	reported	textfile	345727	0.0490336	1.60512e-09	6044	exposure	TRUE	reported	tTiUIv	textfile	2	1	TRUE	0.00598682891015044	36.3902826714751	120.532745484539	NA	NA	0.00598879877939786	6044	4.79634500106422e-06	345727	TRUE	6.39195343639782e-09
rs186757218	G	A	G	A	0.313075	0.0328987	0.0300945	0.0299807	FALSE	FALSE	FALSE	l8Uce3	210788576	0.849208	0.173033	outcome	TRUE	reported	textfile	345727	0.0530003	3.48289e-09	6044	exposure	TRUE	reported	tTiUIv	textfile	2	1	TRUE	0.0057400491791294	34.8815992353575	120.532745484539	NA	NA	0.00574193831854377	6044	1.04560768922243e-07	345727	TRUE	5.70858344037704e-09
rs2014355	C	T	C	T	0.557922	-0.100522	0.294337	0.262298	FALSE	FALSE	FALSE	l8Uce3	120737721	0.128169	0.0660735	outcome	TRUE	reported	textfile	345727	0.0183717	1e-200	6044	exposure	TRUE	reported	tTiUIv	textfile	2	1	TRUE	0.13238820018406	921.944014225929	120.532745484539	NA	NA	0.132426219558876	6044	6.69474321310763e-06	345727	TRUE	2.81723394692069e-187
rs2393794	C	T	C	T	0.22559	-0.0574052	0.194736	0.158423	FALSE	FALSE	FALSE	l8Uce3	120941173	0.473539	0.0800929	outcome	TRUE	reported	textfile	345727	0.0227406	3.40259e-23	6044	exposure	TRUE	reported	tTiUIv	textfile	2	1	TRUE	0.0160212760153375	98.3766694595505	120.532745484539	NA	NA	0.0160264943242174	6044	1.48587747941999e-06	345727	TRUE	2.64492386827621e-22
rs2859400	G	T	G	T	-0.17516	0.12957	0.832007	0.917493	FALSE	FALSE	FALSE	l8Uce3	121065333	0.21444	0.10437	outcome	TRUE	reported	textfile	345727	0.0237039	1.47379e-13	6044	exposure	TRUE	reported	tTiUIv	textfile	2	1	TRUE	0.00895364300005813	54.5866604768261	120.532745484539	NA	NA	0.00895658025559536	6044	4.45784361802745e-06	345727	TRUE	8.58398795035485e-13
rs4767925	G	A	G	A	-0.161495	-0.00821425	0.103529	0.111951	FALSE	FALSE	FALSE	l8Uce3	120648146	0.928156	0.0911028	outcome	TRUE	reported	textfile	345727	0.0296249	4.99917e-08	6044	exposure	TRUE	reported	tTiUIv	textfile	2	1	TRUE	0.00489271395299816	29.7071261747535	120.532745484539	NA	NA	0.00489432559398388	6044	2.35148161376008e-08	345727	TRUE	7.13921212363593e-08
rs526940	C	T	C	T	0.177285	0.0208241	0.875207	0.843879	FALSE	FALSE	FALSE	l8Uce3	120704239	0.797747	0.0812602	outcome	TRUE	reported	textfile	345727	0.0272284	7.46383e-11	6044	exposure	TRUE	reported	tTiUIv	textfile	2	1	TRUE	0.00696529811610835	42.3795171887631	120.532745484539	NA	NA	0.00696758767810463	6044	1.89952861258734e-07	345727	TRUE	1.42457821353772e-10
rs6490295	T	G	T	G	-0.22433	0.0977011	0.356961	0.339471	FALSE	FALSE	FALSE	l8Uce3	120603241	0.113497	0.0617318	outcome	TRUE	reported	textfile	345727	0.0193598	4.77457e-31	6044	exposure	TRUE	reported	tTiUIv	textfile	2	1	TRUE	0.021732326778356	134.223711964646	120.532745484539	NA	NA	0.0217393641434049	6044	7.24514520665016e-06	345727	TRUE	2.6832756505573e-29
rs6490297	C	T	C	T	0.30442	-0.043078	0.271264	0.318572	FALSE	FALSE	FALSE	l8Uce3	120617356	0.489748	0.0623677	outcome	TRUE	reported	textfile	345727	0.0200842	6.79319e-52	6044	exposure	TRUE	reported	tTiUIv	textfile	2	1	TRUE	0.0366193597850633	229.664332648401	120.532745484539	NA	NA	0.0366310373602532	6044	1.37994005979093e-06	345727	TRUE	7.94555379408371e-50
rs649622	T	G	T	G	-0.225308	0.140509	0.106794	0.0822751	FALSE	FALSE	FALSE	l8Uce3	120745084	0.187144	0.106521	outcome	TRUE	reported	textfile	345727	0.0290299	8.41049e-15	6044	exposure	TRUE	reported	tTiUIv	textfile	2	1	TRUE	0.00986803702013494	60.2169022967576	120.532745484539	NA	NA	0.00987127125613294	6044	5.03274406227093e-06	345727	TRUE	5.99994686211258e-14
rs7138861	C	T	C	T	-0.208937	0.0230016	0.340453	0.298383	FALSE	FALSE	FALSE	l8Uce3	120618269	0.717343	0.0635384	outcome	TRUE	reported	textfile	345727	0.0190569	5.70385e-28	6044	exposure	TRUE	reported	tTiUIv	textfile	2	1	TRUE	0.019500648504213	120.166237828421	120.532745484539	NA	NA	0.0195069776170201	6044	3.79064046878795e-07	345727	TRUE	4.04185507972405e-27
rs71454675	G	C	G	C	0.263731	-0.282134	0.0595157	0.0328634	FALSE	TRUE	FALSE	l8Uce3	121089921	0.08124	0.161818	outcome	TRUE	reported	textfile	345727	0.0379043	3.45637e-12	6044	exposure	TRUE	reported	tTiUIv	textfile	2	1	TRUE	0.00794613972358715	48.3951	120.532745484539	NA	NA	0.0079487491171166	6044	8.79270677126567e-06	345727	TRUE	2.74617573497404e-11
rs7304812	A	T	A	T	0.209655	-0.0660934	0.260949	0.33158	FALSE	TRUE	FALSE	l8Uce3	120602900	0.29276	0.0628213	outcome	TRUE	reported	textfile	345727	0.0212479	5.78069e-23	6044	exposure	TRUE	reported	tTiUIv	textfile	2	1	TRUE	0.0158530890418478	97.3273023817042	120.532745484539	NA	NA	0.0158582534532141	6044	3.20162286458683e-06	345727	TRUE	6.76226603052511e-22
rs73226260	A	G	A	G	-0.284745	0.33	0.0367133	0.0246191	FALSE	FALSE	FALSE	l8Uce3	120942738	0.0864311	0.192472	outcome	TRUE	reported	textfile	345727	0.0478952	2.76178e-09	6044	exposure	TRUE	reported	tTiUIv	textfile	2	1	TRUE	0.00581395197210287	35.3333240645717	120.532745484539	NA	NA	0.00581586529180185	6044	8.50272794388662e-06	345727	TRUE	1.48754255951135e-08
rs73419638	G	A	G	A	-0.237784	0.0567522	0.285594	0.265837	FALSE	FALSE	FALSE	l8Uce3	121048096	0.386347	0.065514	outcome	TRUE	reported	textfile	345727	0.019826	3.84158e-33	6044	exposure	TRUE	reported	tTiUIv	textfile	2	1	TRUE	0.0232463953860255	143.797494331107	120.532745484539	NA	NA	0.0232539113826384	6044	2.17052824942191e-06	345727	TRUE	9.05953592217072e-32
rs78470721	C	G	C	G	0.33261	0.162459	0.0543947	0.0344989	FALSE	TRUE	FALSE	l8Uce3	120625889	0.302631	0.157604	outcome	TRUE	reported	textfile	345727	0.0397977	6.40506e-17	6044	exposure	TRUE	reported	tTiUIv	textfile	2	1	TRUE	0.0114245739087134	69.8249963883607	120.532745484539	NA	NA	0.0114283124093122	6044	3.07341325386546e-06	345727	TRUE	4.16058821437622e-16
Indolebutyrate levels
SNP	effect_allele.exposure	other_allele.exposure	effect_allele.outcome	other_allele.outcome	beta.exposure	beta.outcome	eaf.exposure	eaf.outcome	remove	palindromic	ambiguous	id.outcome	pos.outcome	pval.outcome	se.outcome	outcome	mr_keep.outcome	pval_origin.outcome	data_source.outcome	samplesize.outcome	se.exposure	pval.exposure	samplesize.exposure	exposure	mr_keep.exposure	pval_origin.exposure	id.exposure	data_source.exposure	action	SNP_index	mr_keep	R2	f	meanf	units.outcome	units.exposure	rsq.exposure	effective_n.exposure	rsq.outcome	effective_n.outcome	steiger_dir	steiger_pval
rs1505100	T	A	T	A	-0.206969	-0.049185	0.259936	0.294033	FALSE	TRUE	FALSE	bRTwg6	20470350	0.440502	0.0637652	outcome	TRUE	reported	textfile	345727	0.0235241	1.39105e-18	4423	exposure	TRUE	reported	OOVQXS	textfile	2	1	TRUE	0.0172001685525151	77.3727698535246	54.6271014027377	NA	NA	0.0172078157776771	4423	1.72094252542105e-06	345727	TRUE	6.16215833597786e-18
rs189297030	G	C	G	C	-0.616448	-0.223233	0.0135962	0.0206046	FALSE	TRUE	FALSE	bRTwg6	20466204	0.284388	0.208529	outcome	TRUE	reported	textfile	345727	0.0880593	2.5527e-12	4423	exposure	TRUE	reported	OOVQXS	textfile	2	1	TRUE	0.0109582230291963	48.9830714335001	54.6271014027377	NA	NA	0.0109631260315256	4423	3.31475661076661e-06	345727	TRUE	8.96563347939436e-12
rs200529519	AT	A	TAA	T	-0.131997	0.7137	0.284689	0.00678054	TRUE	FALSE	FALSE	bRTwg6	75737794	0.0628406	0.383645	outcome	TRUE	reported	textfile	345727	0.0230227	9.84727e-09	4423	exposure	TRUE	reported	OOVQXS	textfile	2	1	FALSE	0.00737705435742973	32.8563403227439	54.6271014027377	NA	NA	0.00738036700569431	4423	1.00100714164349e-05	345727	TRUE	4.24492617921015e-08
rs34927101	T	C	T	C	0.520625	0.384847	0.0239982	0.0199908	FALSE	FALSE	FALSE	bRTwg6	20433373	0.0568853	0.202106	outcome	TRUE	reported	textfile	345727	0.0675948	1.33795e-14	4423	exposure	TRUE	reported	OOVQXS	textfile	2	1	TRUE	0.0132348891761954	59.2962240011822	54.6271014027377	NA	NA	0.0132407971828422	4423	1.04877531603563e-05	345727	TRUE	1.15749762880113e-13
5-acetylamino-6-amino-3-methyluracil levels
SNP	effect_allele.exposure	other_allele.exposure	effect_allele.outcome	other_allele.outcome	beta.exposure	beta.outcome	eaf.exposure	eaf.outcome	remove	palindromic	ambiguous	id.outcome	pos.outcome	pval.outcome	se.outcome	outcome	mr_keep.outcome	pval_origin.outcome	data_source.outcome	samplesize.outcome	se.exposure	pval.exposure	samplesize.exposure	exposure	mr_keep.exposure	pval_origin.exposure	id.exposure	data_source.exposure	action	SNP_index	mr_keep	R2	f	meanf	units.outcome	units.exposure	rsq.exposure	effective_n.exposure	rsq.outcome	effective_n.outcome	steiger_dir	steiger_pval
rs13254216	C	T	C	T	0.363463	0.144474	0.058253	0.0686748	FALSE	FALSE	FALSE	C55Vv6	18371790	0.203782	0.113683	outcome	TRUE	reported	textfile	345727	0.0333302	1.09225e-27	8006	exposure	TRUE	reported	oT73FA	textfile	2	1	TRUE	0.0146361088962395	118.887465496912	107.257381141905	NA	NA	0.0146397125545277	8006	4.67149113069358e-06	345727	TRUE	4.44643844778597e-26
rs1389105	T	C	T	C	-0.0950728	-0.146569	0.623181	0.551609	FALSE	FALSE	FALSE	C55Vv6	18360664	0.0105203	0.057293	outcome	TRUE	reported	textfile	345727	0.0163153	5.63628e-09	8006	exposure	TRUE	reported	oT73FA	textfile	2	1	TRUE	0.00422346349160349	33.9479798402634	107.257381141905	NA	NA	0.00422451437151588	8006	1.89296295976208e-05	345727	TRUE	7.79982612886531e-08
rs1495741	A	G	A	G	-0.383631	-0.0214632	0.773699	0.748206	FALSE	FALSE	FALSE	C55Vv6	18415371	0.746366	0.0663604	outcome	TRUE	reported	textfile	345727	0.01834	3.69596e-97	8006	exposure	TRUE	reported	oT73FA	textfile	2	1	TRUE	0.0518207377863037	437.441738889344	107.257381141905	NA	NA	0.0518330153257066	8006	3.02579874153852e-07	345727	TRUE	6.53655503551615e-93
rs2472297	T	C	T	C	0.121476	0.0806358	0.250532	0.248499	FALSE	FALSE	FALSE	C55Vv6	74735539	0.228875	0.0670143	outcome	TRUE	reported	textfile	345727	0.0180871	1.86565e-11	8006	exposure	TRUE	reported	oT73FA	textfile	2	1	TRUE	0.00560257259591413	45.095642669512	107.257381141905	NA	NA	0.00560396469385938	8006	4.18782208561374e-06	345727	TRUE	1.10286473701927e-10
rs60445923	C	G	C	G	0.239166	0.162939	0.0904463	0.123872	FALSE	TRUE	FALSE	C55Vv6	18352793	0.0684022	0.0894119	outcome	TRUE	reported	textfile	345727	0.0275385	3.79445e-18	8006	exposure	TRUE	reported	oT73FA	textfile	2	1	TRUE	0.00933319508435334	75.4066786981168	107.257381141905	NA	NA	0.00933550544542052	8006	9.60559980442868e-06	345727	TRUE	1.05960739558513e-16
rs62494884	G	A	G	A	0.184129	-0.0610307	0.0855537	0.0472596	FALSE	FALSE	FALSE	C55Vv6	18467807	0.656413	0.137188	outcome	TRUE	reported	textfile	345727	0.0282709	7.36598e-11	8006	exposure	TRUE	reported	oT73FA	textfile	2	1	TRUE	0.00527053276889232	42.4088615768463	107.257381141905	NA	NA	0.00527184280071357	8006	5.72444542000729e-07	345727	TRUE	1.94107535513765e-10
rs73075157	A	G	A	G	-0.129695	-0.0346878	0.130484	0.0888098	FALSE	FALSE	FALSE	C55Vv6	17527220	0.732732	0.101577	outcome	TRUE	reported	textfile	345727	0.0235791	3.78896e-08	8006	exposure	TRUE	reported	oT73FA	textfile	2	1	TRUE	0.00376476895624717	30.2470840086953	107.257381141905	NA	NA	0.00376570613564314	8006	3.37312019677421e-07	345727	TRUE	7.33694751801128e-08
rs7837306	T	C	T	C	-0.157661	-0.0670796	0.757621	0.708436	FALSE	FALSE	FALSE	C55Vv6	18218077	0.294159	0.0639437	outcome	TRUE	reported	textfile	345727	0.0182487	5.64236e-18	8006	exposure	TRUE	reported	oT73FA	textfile	2	1	TRUE	0.00923716732816207	74.6235979555542	107.257381141905	NA	NA	0.00923945413999222	8006	3.18312164578022e-06	345727	TRUE	5.77472727710546e-17
Beta-hydroxyisovaleroylcarnitine levels
SNP	effect_allele.exposure	other_allele.exposure	effect_allele.outcome	other_allele.outcome	beta.exposure	beta.outcome	eaf.exposure	eaf.outcome	remove	palindromic	ambiguous	id.outcome	pos.outcome	pval.outcome	se.outcome	outcome	mr_keep.outcome	pval_origin.outcome	data_source.outcome	samplesize.outcome	se.exposure	pval.exposure	samplesize.exposure	exposure	mr_keep.exposure	pval_origin.exposure	id.exposure	data_source.exposure	action	SNP_index	mr_keep	R2	f	meanf	units.outcome	units.exposure	rsq.exposure	effective_n.exposure	rsq.outcome	effective_n.outcome	steiger_dir	steiger_pval
rs114332093	C	T	C	T	0.174357	-0.00740452	0.0744786	0.0541511	FALSE	FALSE	FALSE	QbvDvi	183170079	0.954474	0.1297	outcome	TRUE	reported	textfile	345727	0.0289516	1.7189e-09	8232	exposure	TRUE	reported	zEAGg3	textfile	2	1	TRUE	0.00438650922565315	36.2600258651051	72.5020969406036	NA	NA	0.00438757052895984	8232	9.42720778497844e-09	345727	TRUE	2.87616735404209e-09
rs1171617	T	G	T	G	0.116973	0.072087	0.769098	0.839945	FALSE	FALSE	FALSE	QbvDvi	59707424	0.358055	0.078434	outcome	TRUE	reported	textfile	345727	0.0183559	1.85991e-10	8232	exposure	TRUE	reported	zEAGg3	textfile	2	1	TRUE	0.00490882335597707	40.5989090928736	72.5020969406036	NA	NA	0.00491001040846364	8232	2.44328050729986e-06	345727	TRUE	7.63662151565351e-10
rs1403475	C	T	C	T	-0.103933	-0.0289773	0.762244	0.779716	FALSE	FALSE	FALSE	QbvDvi	182783591	0.678561	0.0699214	outcome	TRUE	reported	textfile	345727	0.0180084	7.86377e-09	8232	exposure	TRUE	reported	zEAGg3	textfile	2	1	TRUE	0.00402993085674122	33.3005297835006	72.5020969406036	NA	NA	0.00403090623622684	8232	4.96780570956164e-07	345727	TRUE	1.73538788007394e-08
rs147117425	A	G	A	G	-0.275045	-0.621813	0.0244555	0.00918274	FALSE	FALSE	FALSE	QbvDvi	131554665	0.0375985	0.299062	outcome	TRUE	reported	textfile	345727	0.0486293	1.54989e-08	8232	exposure	TRUE	reported	zEAGg3	textfile	2	1	TRUE	0.00387098688816834	31.9820240855176	72.5020969406036	NA	NA	0.00387192394739589	8232	1.25043439832858e-05	345727	TRUE	1.37291540088299e-07
rs635620	G	A	G	A	0.132252	0.146225	0.293437	0.414665	FALSE	FALSE	FALSE	QbvDvi	132384571	0.0131229	0.0589517	outcome	TRUE	reported	textfile	345727	0.0165809	1.5097e-15	8232	exposure	TRUE	reported	zEAGg3	textfile	2	1	TRUE	0.00766901324690498	63.6037570776091	72.5020969406036	NA	NA	0.00767086262364856	8232	1.77955772161693e-05	345727	TRUE	6.67546415956601e-14
rs6443851	G	A	G	A	-0.256558	-0.047962	0.675591	0.689188	FALSE	FALSE	FALSE	QbvDvi	183101261	0.441732	0.0623472	outcome	TRUE	reported	textfile	345727	0.016141	6.89111e-57	8232	exposure	TRUE	reported	zEAGg3	textfile	2	1	TRUE	0.0297767013699023	252.583351296872	72.5020969406036	NA	NA	0.0297837219872473	8232	1.7117058402311e-06	345727	TRUE	2.90381236469388e-54
rs73177394	A	G	A	G	0.127062	0.0415501	0.193546	0.185354	FALSE	FALSE	FALSE	QbvDvi	182990299	0.575424	0.0741858	outcome	TRUE	reported	textfile	345727	0.0192925	4.51461e-11	8232	exposure	TRUE	reported	zEAGg3	textfile	2	1	TRUE	0.00524163282184177	43.3659464922417	72.5020969406036	NA	NA	0.00524289993033885	8232	9.07342802685698e-07	345727	TRUE	1.38462149944073e-10
rs7427317	A	G	A	G	-0.124761	-0.0483509	0.72546	0.682612	FALSE	FALSE	FALSE	QbvDvi	183149356	0.43637	0.0621208	outcome	TRUE	reported	textfile	345727	0.0170027	2.17237e-13	8232	exposure	TRUE	reported	zEAGg3	textfile	2	1	TRUE	0.0064980830512394	53.8290088819813	72.5020969406036	NA	NA	0.00649965190853547	8232	1.75227997766244e-06	345727	TRUE	1.04143273413754e-12
rs7635560	C	A	C	A	0.307005	0.102247	0.0619094	0.0808089	FALSE	FALSE	FALSE	QbvDvi	183011505	0.334796	0.10601	outcome	TRUE	reported	textfile	345727	0.0311686	6.86684e-23	8232	exposure	TRUE	reported	zEAGg3	textfile	2	1	TRUE	0.0116482976348083	96.9953198897309	72.5020969406036	NA	NA	0.011651095346159	8232	2.69076348717709e-06	345727	TRUE	1.09029106773812e-21
Dimethylarginine (sdma + adma) levels
SNP	effect_allele.exposure	other_allele.exposure	effect_allele.outcome	other_allele.outcome	beta.exposure	beta.outcome	eaf.exposure	eaf.outcome	remove	palindromic	ambiguous	id.outcome	pos.outcome	pval.outcome	se.outcome	outcome	mr_keep.outcome	pval_origin.outcome	data_source.outcome	samplesize.outcome	se.exposure	pval.exposure	samplesize.exposure	exposure	mr_keep.exposure	pval_origin.exposure	id.exposure	data_source.exposure	action	SNP_index	mr_keep	R2	f	meanf	units.outcome	units.exposure	rsq.exposure	effective_n.exposure	rsq.outcome	effective_n.outcome	steiger_dir	steiger_pval
rs11161609	T	G	T	G	-0.0981957	-0.0369692	0.566556	0.55444	FALSE	FALSE	FALSE	Sjc5M7	85397053	0.523833	0.0579957	outcome	TRUE	reported	textfile	345727	0.0149412	4.95969e-11	8233	exposure	TRUE	reported	bq8sbv	textfile	2	1	TRUE	0.00521895280382911	43.1825683142979	57.140809744719	NA	NA	0.00522021430516595	8233	1.1753229603116e-06	345727	TRUE	1.63703683083807e-10
rs163910	A	G	A	G	0.106277	0.0282333	0.441967	0.443267	FALSE	FALSE	FALSE	Sjc5M7	35001103	0.630392	0.0586759	outcome	TRUE	reported	textfile	345727	0.0150246	1.51056e-12	8233	exposure	TRUE	reported	bq8sbv	textfile	2	1	TRUE	0.00604064406726772	50.0227107083496	57.140809744719	NA	NA	0.0060421029776975	8233	6.6968826696741e-07	345727	TRUE	4.84809500222014e-12
rs16899975	C	G	C	G	0.109002	0.0545757	0.225381	0.235389	FALSE	TRUE	FALSE	Sjc5M7	34998952	0.426517	0.0686343	outcome	TRUE	reported	textfile	345727	0.0177861	8.87266e-10	8233	exposure	TRUE	reported	bq8sbv	textfile	2	1	TRUE	0.00454122101824676	37.549309916603	57.140809744719	NA	NA	0.00454231944938312	8233	1.82887756585476e-06	345727	TRUE	3.0180982678886e-09
rs37370	T	C	T	C	-0.244251	-0.27717	0.902093	0.89676	FALSE	FALSE	FALSE	Sjc5M7	35039381	0.0013964	0.0867403	outcome	TRUE	reported	textfile	345727	0.0246942	4.55281e-23	8233	exposure	TRUE	reported	bq8sbv	textfile	2	1	TRUE	0.0117434142323776	97.8086500396253	57.140809744719	NA	NA	0.0117462341748728	8233	2.95329610374908e-05	345727	TRUE	1.8921045223581e-20
Mannonate levels
SNP	effect_allele.exposure	other_allele.exposure	effect_allele.outcome	other_allele.outcome	beta.exposure	beta.outcome	eaf.exposure	eaf.outcome	remove	palindromic	ambiguous	id.outcome	pos.outcome	pval.outcome	se.outcome	outcome	mr_keep.outcome	pval_origin.outcome	data_source.outcome	samplesize.outcome	se.exposure	pval.exposure	samplesize.exposure	exposure	mr_keep.exposure	pval_origin.exposure	id.exposure	data_source.exposure	action	SNP_index	mr_keep	R2	f	meanf	units.outcome	units.exposure	rsq.exposure	effective_n.exposure	rsq.outcome	effective_n.outcome	steiger_dir	steiger_pval
rs1260326	C	T	C	T	0.211453	-0.123553	0.587149	0.650088	FALSE	FALSE	FALSE	3JBXRP	27508073	0.0417359	0.0606798	outcome	TRUE	reported	textfile	345727	0.0149412	1.80524e-45	8166	exposure	TRUE	reported	fhaPWO	textfile	2	1	TRUE	0.0239399858755164	200.239782246412	93.522844792923	NA	NA	0.0239457102081748	8166	1.19917430818088e-05	345727	TRUE	2.98384282472153e-42
rs141428740	A	G	A	G	-0.165697	0.11381	0.0632849	0.0829848	FALSE	FALSE	FALSE	3JBXRP	27512166	0.291595	0.107915	outcome	TRUE	reported	textfile	345727	0.0301732	3.98467e-08	8166	exposure	TRUE	reported	fhaPWO	textfile	2	1	TRUE	0.00367939390815306	30.1495037666545	93.522844792923	NA	NA	0.00368029196123105	8166	3.2171035068115e-06	345727	TRUE	1.40968244782524e-07
rs1881397	G	A	G	A	0.124091	-0.069758	0.230254	0.247561	FALSE	FALSE	FALSE	3JBXRP	27609418	0.296786	0.0668595	outcome	TRUE	reported	textfile	345727	0.0175156	1.39421e-12	8166	exposure	TRUE	reported	fhaPWO	textfile	2	1	TRUE	0.00610885723922893	50.1792483657029	93.522844792923	NA	NA	0.00611034463021771	8166	3.14868807691809e-06	345727	TRUE	8.12259699991143e-12
Etiocholanolone glucuronide levels
SNP	effect_allele.exposure	other_allele.exposure	effect_allele.outcome	other_allele.outcome	beta.exposure	beta.outcome	eaf.exposure	eaf.outcome	remove	palindromic	ambiguous	id.outcome	pos.outcome	pval.outcome	se.outcome	outcome	mr_keep.outcome	pval_origin.outcome	data_source.outcome	samplesize.outcome	se.exposure	pval.exposure	samplesize.exposure	exposure	mr_keep.exposure	pval_origin.exposure	id.exposure	data_source.exposure	action	SNP_index	mr_keep	R2	f	meanf	units.outcome	units.exposure	rsq.exposure	effective_n.exposure	rsq.outcome	effective_n.outcome	steiger_dir	steiger_pval
rs10897407	G	A	G	A	-0.140361	0.0769039	0.631484	0.63562	FALSE	FALSE	FALSE	i1Hblr	63369912	0.201027	0.0601455	outcome	TRUE	reported	textfile	345727	0.0158587	8.69315e-19	7821	exposure	TRUE	reported	OtaOtC	textfile	2	1	TRUE	0.00991670032325922	78.3153092804211	129.959991114239	NA	NA	0.00991921172739609	7821	4.72887256773361e-06	345727	TRUE	1.26250404490976e-17
rs138529890	A	G	A	G	0.300052	-0.0526655	0.0346446	0.0232088	FALSE	FALSE	FALSE	i1Hblr	32253285	0.779367	0.187995	outcome	TRUE	reported	textfile	345727	0.0421122	1.04035e-12	7821	exposure	TRUE	reported	OtaOtC	textfile	2	1	TRUE	0.00644918727713458	50.7535142382102	129.959991114239	NA	NA	0.00645082625518562	7821	2.27001612408712e-07	345727	TRUE	2.6312917077284e-12
rs141232858	C	A	C	A	0.846441	-0.126795	0.0595802	0.0315822	FALSE	FALSE	FALSE	i1Hblr	63107062	0.425078	0.158962	outcome	TRUE	reported	textfile	345727	0.0308893	2.56518e-165	7821	exposure	TRUE	reported	OtaOtC	textfile	2	1	TRUE	0.0875992886110062	750.699587472636	129.959991114239	NA	NA	0.0876197321107912	7821	1.84028902032026e-06	345727	TRUE	1.89518998900826e-155
rs148982377	C	T	C	T	-0.30445	-0.0148741	0.0322643	0.086722	FALSE	FALSE	FALSE	i1Hblr	99477415	0.886123	0.103862	outcome	TRUE	reported	textfile	345727	0.0433578	2.19019e-12	7821	exposure	TRUE	reported	OtaOtC	textfile	2	1	TRUE	0.00626478076403933	49.2931314557669	129.959991114239	NA	NA	0.00626637317312231	7821	5.93221961249362e-08	345727	TRUE	4.68801769481655e-12
rs635304	T	C	T	C	-0.119698	0.0574237	0.295644	0.344545	FALSE	FALSE	FALSE	i1Hblr	31642836	0.34982	0.0614199	outcome	TRUE	reported	textfile	345727	0.0165446	4.66074e-13	7821	exposure	TRUE	reported	OtaOtC	textfile	2	1	TRUE	0.00664816906766652	52.3299321764934	129.959991114239	NA	NA	0.00664985827592476	7821	2.52832122671755e-06	345727	TRUE	2.43513756316189e-12
rs72794638	C	T	C	T	0.433765	0.172967	0.0183451	0.00842255	FALSE	FALSE	FALSE	i1Hblr	31561978	0.590493	0.321427	outcome	TRUE	reported	textfile	345727	0.0563676	1.41169e-14	7821	exposure	TRUE	reported	OtaOtC	textfile	2	1	TRUE	0.0075147012784307	59.202337174904	129.959991114239	NA	NA	0.00751660899455993	7821	8.3758838650398e-07	345727	TRUE	5.49234962872599e-14
rs76727724	C	T	C	T	0.316021	-0.137564	0.0419173	0.0258019	FALSE	FALSE	FALSE	i1Hblr	62957050	0.438289	0.177483	outcome	TRUE	reported	textfile	345727	0.0379918	8.93557e-17	7821	exposure	TRUE	reported	OtaOtC	textfile	2	1	TRUE	0.00876929351868878	69.1737105946085	129.959991114239	NA	NA	0.00877151691644099	7821	1.73765889968724e-06	345727	TRUE	5.59692468148547e-16
rs7780066	A	G	A	G	0.10663	-0.0671323	0.794698	0.812769	FALSE	FALSE	FALSE	i1Hblr	138117169	0.368433	0.0746401	outcome	TRUE	reported	textfile	345727	0.0189544	1.84871e-08	7821	exposure	TRUE	reported	OtaOtC	textfile	2	1	TRUE	0.00403016322300145	31.6393580177308	129.959991114239	NA	NA	0.00403118993149859	7821	2.33984358628526e-06	345727	TRUE	5.78866108393508e-08
rs79630302	C	T	C	T	0.6016	-0.302905	0.0139779	0.0154344	FALSE	FALSE	FALSE	i1Hblr	63532619	0.187913	0.230035	outcome	TRUE	reported	textfile	345727	0.0652427	2.94446e-20	7821	exposure	TRUE	reported	OtaOtC	textfile	2	1	TRUE	0.0107545827416746	85.0042678895676	129.959991114239	NA	NA	0.0107573040340203	7821	5.01524417843498e-06	345727	TRUE	5.31017355286966e-19
rs9735993	C	T	C	T	-0.138606	0.0474384	0.642014	0.547061	FALSE	FALSE	FALSE	i1Hblr	63037326	0.417992	0.0585724	outcome	TRUE	reported	textfile	345727	0.0161996	1.16696e-17	7821	exposure	TRUE	reported	OtaOtC	textfile	2	1	TRUE	0.0092735697334858	73.1887628420488	129.959991114239	NA	NA	0.00927591979074234	7821	1.89732800489869e-06	345727	TRUE	8.30008842524635e-17
Octadecanedioylcarnitine (C18-DC) levels
SNP	effect_allele.exposure	other_allele.exposure	effect_allele.outcome	other_allele.outcome	beta.exposure	beta.outcome	eaf.exposure	eaf.outcome	remove	palindromic	ambiguous	id.outcome	pos.outcome	pval.outcome	se.outcome	outcome	mr_keep.outcome	pval_origin.outcome	data_source.outcome	samplesize.outcome	se.exposure	pval.exposure	samplesize.exposure	exposure	mr_keep.exposure	pval_origin.exposure	id.exposure	data_source.exposure	action	SNP_index	mr_keep	R2	f	meanf	units.outcome	units.exposure	rsq.exposure	effective_n.exposure	rsq.outcome	effective_n.outcome	steiger_dir	steiger_pval
rs10505870	A	G	A	G	0.0935007	-0.0496259	0.278468	0.203055	FALSE	FALSE	FALSE	FQPyM7	21018962	0.48934	0.0717801	outcome	TRUE	reported	textfile	345727	0.0167514	2.38232e-08	8049	exposure	TRUE	reported	T5g4fo	textfile	2	1	TRUE	0.00385574066190003	31.1472407891262	92.1421168683664	NA	NA	0.00385669527113208	8049	1.38253867276422e-06	345727	TRUE	6.3142555229965e-08
rs1074501	T	C	T	C	-0.0997651	0.0685304	0.688942	0.771177	FALSE	FALSE	FALSE	FQPyM7	73523155	0.328448	0.0701262	outcome	TRUE	reported	textfile	345727	0.0162873	9.04943e-10	8049	exposure	TRUE	reported	T5g4fo	textfile	2	1	TRUE	0.00463978060432653	37.5103543375323	92.1421168683664	NA	NA	0.00464092842282153	8049	2.76231967362392e-06	345727	TRUE	3.57329579183785e-09
rs11045856	G	T	G	T	-0.338344	0.065103	0.236964	0.172842	FALSE	FALSE	FALSE	FQPyM7	21197755	0.393944	0.0763685	outcome	TRUE	reported	textfile	345727	0.0170453	1.10706e-87	8049	exposure	TRUE	reported	T5g4fo	textfile	2	1	TRUE	0.0466670487881604	393.912474252534	92.1421168683664	NA	NA	0.0466781060068351	8049	2.10204391199659e-06	345727	TRUE	2.66432750738451e-83
rs11046005	C	T	C	T	-0.0932465	0.0895917	0.451577	0.325397	FALSE	FALSE	FALSE	FQPyM7	21371143	0.148201	0.061962	outcome	TRUE	reported	textfile	345727	0.0149847	4.88431e-10	8049	exposure	TRUE	reported	T5g4fo	textfile	2	1	TRUE	0.00478787392023954	38.7133762004421	92.1421168683664	NA	NA	0.00478905819873175	8049	6.04715761621928e-06	345727	TRUE	3.06185666178344e-09
rs11085962	G	C	G	C	0.103495	-0.0993511	0.42565	0.446372	FALSE	TRUE	TRUE	FQPyM7	15593227	0.0871164	0.0580725	outcome	TRUE	reported	textfile	345727	0.0153724	1.66738e-11	8049	exposure	TRUE	reported	T5g4fo	textfile	2	1	FALSE	0.005599827489951	45.3155711929247	92.1421168683664	NA	NA	0.00560121147446	8049	8.46583602850834e-06	345727	TRUE	1.64947240260052e-10
rs11615107	T	C	T	C	-0.256906	-0.127672	0.06598	0.0487845	FALSE	FALSE	FALSE	FQPyM7	21237903	0.336889	0.132946	outcome	TRUE	reported	textfile	345727	0.0302659	2.0965e-17	8049	exposure	TRUE	reported	T5g4fo	textfile	2	1	TRUE	0.00887215375489592	72.0333118841581	92.1421168683664	NA	NA	0.00887433926980891	8049	2.6675270342501e-06	345727	TRUE	1.81978091024673e-16
rs116877313	A	G	A	G	0.278272	-0.28114	0.0249502	0.0574219	FALSE	FALSE	FALSE	FQPyM7	21344622	0.0287197	0.128532	outcome	TRUE	reported	textfile	345727	0.048166	7.58892e-09	8049	exposure	TRUE	reported	T5g4fo	textfile	2	1	TRUE	0.0041297019466778	33.3695177272341	92.1421168683664	NA	NA	0.00413072410233514	8049	1.38384023972181e-05	345727	TRUE	7.56893644307908e-08
rs117276944	G	A	G	A	0.416848	-0.0262295	0.0310809	0.0318013	FALSE	FALSE	FALSE	FQPyM7	21347314	0.875922	0.167985	outcome	TRUE	reported	textfile	345727	0.0434368	8.25837e-22	8049	exposure	TRUE	reported	T5g4fo	textfile	2	1	TRUE	0.0113124567783357	92.0729105159345	92.1421168683664	NA	NA	0.0113152365605288	8049	7.05193337490894e-08	345727	TRUE	3.56229340649097e-21
rs117428564	T	C	T	C	0.374367	0.260089	0.0183308	0.00721791	FALSE	FALSE	FALSE	FQPyM7	20960665	0.453987	0.347348	outcome	TRUE	reported	textfile	345727	0.0556701	1.75903e-11	8049	exposure	TRUE	reported	T5g4fo	textfile	2	1	TRUE	0.00558696558840224	45.2109038539253	92.1421168683664	NA	NA	0.00558834641198601	8049	1.62174614763207e-06	345727	TRUE	6.65286713368055e-11
rs11829410	G	A	G	A	0.292454	-0.0376982	0.0536625	0.0906019	FALSE	FALSE	FALSE	FQPyM7	20979640	0.713571	0.102702	outcome	TRUE	reported	textfile	345727	0.0329988	7.81929e-19	8049	exposure	TRUE	reported	T5g4fo	textfile	2	1	TRUE	0.00966405630937761	78.5255363263435	92.1421168683664	NA	NA	0.00966643499443721	8049	3.89719800605826e-07	345727	TRUE	3.58911992654403e-18
rs12816954	A	G	A	G	-0.340362	-0.254846	0.0181796	0.00947437	FALSE	FALSE	FALSE	FQPyM7	21242477	0.369137	0.283764	outcome	TRUE	reported	textfile	345727	0.0563672	1.55753e-09	8049	exposure	TRUE	reported	T5g4fo	textfile	2	1	TRUE	0.0045094587667255	36.4519934573008	92.1421168683664	NA	NA	0.00451057449147188	8049	2.33297051190454e-06	345727	TRUE	5.57846720250632e-09
rs148273051	T	C	T	C	-0.178096	0.0322319	0.107365	0.114717	FALSE	FALSE	FALSE	FQPyM7	20768404	0.721104	0.0902895	outcome	TRUE	reported	textfile	345727	0.0241022	1.47711e-13	8049	exposure	TRUE	reported	T5g4fo	textfile	2	1	TRUE	0.00673778188045797	54.5867242334993	92.1421168683664	NA	NA	0.00673944520168792	8049	3.68609371530388e-07	345727	TRUE	4.41582145310147e-13
rs150897358	G	C	G	C	-0.314099	0.244957	0.0226705	0.0156226	FALSE	TRUE	FALSE	FQPyM7	21214819	0.299111	0.235912	outcome	TRUE	reported	textfile	345727	0.0501405	3.74287e-10	8049	exposure	TRUE	reported	T5g4fo	textfile	2	1	TRUE	0.00485178589060581	39.2326695743968	92.1421168683664	NA	NA	0.00485298590060757	8049	3.11851261042706e-06	345727	TRUE	1.63218882158444e-09
rs183068529	G	T	G	T	-0.352015	0.102314	0.0227018	0.0207223	FALSE	FALSE	FALSE	FQPyM7	20996858	0.619588	0.206098	outcome	TRUE	reported	textfile	345727	0.0504672	3.0562e-12	8049	exposure	TRUE	reported	T5g4fo	textfile	2	1	TRUE	0.0060082056807065	48.6402718704081	92.1421168683664	NA	NA	0.00600968998497572	8049	7.12839042516213e-07	345727	TRUE	9.55016424436886e-12
rs1859792	C	T	C	T	0.0985258	0.0967068	0.30076	0.398836	FALSE	FALSE	FALSE	FQPyM7	76159946	0.103685	0.0594298	outcome	TRUE	reported	textfile	345727	0.0163329	1.61586e-09	8049	exposure	TRUE	reported	T5g4fo	textfile	2	1	TRUE	0.00450062056101695	36.3802272532941	92.1421168683664	NA	NA	0.00450173410891404	8049	7.65898778145722e-06	345727	TRUE	1.10936859956331e-08
rs1865109	A	G	A	G	-0.115328	-0.0535826	0.741331	0.73742	FALSE	FALSE	FALSE	FQPyM7	15959731	0.418688	0.0662579	outcome	TRUE	reported	textfile	345727	0.0172871	2.53526e-11	8049	exposure	TRUE	reported	T5g4fo	textfile	2	1	TRUE	0.00549906056719295	44.4956245184035	92.1421168683664	NA	NA	0.00550041978514391	8049	1.89164930544078e-06	345727	TRUE	1.00233418671169e-10
rs2045940	C	T	C	T	-0.142504	0.113337	0.209846	0.313059	FALSE	FALSE	FALSE	FQPyM7	21367164	0.0695264	0.0624447	outcome	TRUE	reported	textfile	345727	0.0184805	1.24781e-14	8049	exposure	TRUE	reported	T5g4fo	textfile	2	1	TRUE	0.00733311142322306	59.4454678621145	92.1421168683664	NA	NA	0.00733492062507046	8049	9.52834196376345e-06	345727	TRUE	2.14704725147067e-13
rs2108622	T	C	T	C	-0.177705	0.0257161	0.296554	0.197057	FALSE	FALSE	FALSE	FQPyM7	15879621	0.723123	0.0725855	outcome	TRUE	reported	textfile	345727	0.0162276	6.58629e-28	8049	exposure	TRUE	reported	T5g4fo	textfile	2	1	TRUE	0.0146800007349108	119.889950474907	92.1421168683664	NA	NA	0.0146835957257245	8049	3.63060936246838e-07	345727	TRUE	6.27443743643636e-27
rs2276918	G	A	G	A	0.153887	-0.0233616	0.42907	0.441117	FALSE	FALSE	FALSE	FQPyM7	186209044	0.688559	0.058286	outcome	TRUE	reported	textfile	345727	0.0151025	2.20841e-24	8049	exposure	TRUE	reported	T5g4fo	textfile	2	1	TRUE	0.0127349722627286	103.800214652644	92.1421168683664	NA	NA	0.0127380970925906	8049	4.64671114581865e-07	345727	TRUE	1.67972376508981e-23
rs4149021	A	G	A	G	0.477964	-0.177931	0.0173101	0.072321	FALSE	FALSE	FALSE	FQPyM7	21141851	0.121375	0.114866	outcome	TRUE	reported	textfile	345727	0.0569526	4.76649e-17	8049	exposure	TRUE	reported	T5g4fo	textfile	2	1	TRUE	0.00867436461402238	70.4134035854526	92.1421168683664	NA	NA	0.00867650183322793	8049	6.94043104902833e-06	345727	TRUE	8.26928313358087e-16
rs4149056	C	T	C	T	0.524674	-0.0335912	0.158107	0.20103	FALSE	FALSE	FALSE	FQPyM7	21178615	0.645584	0.0730394	outcome	TRUE	reported	textfile	345727	0.0196894	1.90983e-156	8049	exposure	TRUE	reported	T5g4fo	textfile	2	1	TRUE	0.0810690484137497	709.914745454314	92.1421168683664	NA	NA	0.0810875634769545	8049	6.11794534055336e-07	345727	TRUE	6.8371892236126e-148
rs55845073	G	A	G	A	0.102091	-0.0195864	0.284001	0.305616	FALSE	FALSE	FALSE	FQPyM7	20803985	0.756441	0.0631498	outcome	TRUE	reported	textfile	345727	0.0170087	1.94586e-09	8049	exposure	TRUE	reported	T5g4fo	textfile	2	1	TRUE	0.00445606152449157	36.0184274161655	92.1421168683664	NA	NA	0.00445716409691037	8049	2.78249488140817e-07	345727	TRUE	4.05166857766147e-09
rs56031203	G	A	G	A	0.488232	0.20245	0.0242791	0.0123398	FALSE	FALSE	FALSE	FQPyM7	21274934	0.43114	0.257164	outcome	TRUE	reported	textfile	345727	0.0483908	6.15737e-24	8049	exposure	TRUE	reported	T5g4fo	textfile	2	1	TRUE	0.0124889780397691	101.769807172916	92.1421168683664	NA	NA	0.0124920432728213	8049	1.79260108040346e-06	345727	TRUE	8.05936230733037e-23
rs59305158	T	C	T	C	0.0956364	-0.0556237	0.285061	0.280489	FALSE	FALSE	FALSE	FQPyM7	15967118	0.387177	0.0643235	outcome	TRUE	reported	textfile	345727	0.0165806	8.02376e-09	8049	exposure	TRUE	reported	T5g4fo	textfile	2	1	TRUE	0.00411635316892704	33.2612088327368	92.1421168683664	NA	NA	0.00411737203424616	8049	2.16296099913523e-06	345727	TRUE	2.58698746597463e-08
rs72738356	A	G	A	G	-0.126732	-0.0639435	0.224815	0.269914	FALSE	FALSE	FALSE	FQPyM7	73559459	0.326378	0.0651531	outcome	TRUE	reported	textfile	345727	0.0181225	2.68973e-12	8049	exposure	TRUE	reported	T5g4fo	textfile	2	1	TRUE	0.00603898269337124	48.8909453061246	92.1421168683664	NA	NA	0.00604047455477849	8049	2.78606114843897e-06	345727	TRUE	1.40226527827481e-11
rs73009652	A	G	A	G	-0.369687	0.568277	0.0126282	0.00333875	FALSE	FALSE	FALSE	FQPyM7	15661849	0.22927	0.472681	outcome	TRUE	reported	textfile	345727	0.0675461	4.42196e-08	8049	exposure	TRUE	reported	T5g4fo	textfile	2	1	TRUE	0.003707768556517	29.9474517944034	92.1421168683664	NA	NA	0.00370868666701898	8049	4.18072177040305e-06	345727	TRUE	1.73673027052397e-07
rs7306128	G	A	G	A	0.292454	-0.0367914	0.0536625	0.0907363	FALSE	FALSE	FALSE	FQPyM7	20979253	0.720155	0.102697	outcome	TRUE	reported	textfile	345727	0.0329988	7.81929e-19	8049	exposure	TRUE	reported	T5g4fo	textfile	2	1	TRUE	0.00966405630937761	78.5255363263435	92.1421168683664	NA	NA	0.00966643499443721	8049	3.712326516187e-07	345727	TRUE	3.54737239177121e-18
rs73062310	T	C	T	C	0.518422	-0.312053	0.0129943	0.00615824	FALSE	FALSE	FALSE	FQPyM7	21167567	0.381162	0.356324	outcome	TRUE	reported	textfile	345727	0.0666407	7.28878e-15	8049	exposure	TRUE	reported	T5g4fo	textfile	2	1	TRUE	0.00746264323589648	60.5034054486793	92.1421168683664	NA	NA	0.00746448415510953	8049	2.21837430147094e-06	345727	TRUE	4.41215336066184e-14
Adipoylcarnitine (C6-DC) levels
SNP	effect_allele.exposure	other_allele.exposure	effect_allele.outcome	other_allele.outcome	beta.exposure	beta.outcome	eaf.exposure	eaf.outcome	remove	palindromic	ambiguous	id.outcome	pos.outcome	pval.outcome	se.outcome	outcome	mr_keep.outcome	pval_origin.outcome	data_source.outcome	samplesize.outcome	se.exposure	pval.exposure	samplesize.exposure	exposure	mr_keep.exposure	pval_origin.exposure	id.exposure	data_source.exposure	action	SNP_index	mr_keep	R2	f	meanf	units.outcome	units.exposure	rsq.exposure	effective_n.exposure	rsq.outcome	effective_n.outcome	steiger_dir	steiger_pval
rs11211403	T	G	T	G	0.212526	-0.00968706	0.875681	0.86487	FALSE	FALSE	FALSE	W06CTD	46927183	0.909837	0.0855418	outcome	TRUE	reported	textfile	345727	0.0226904	7.50966e-21	8216	exposure	TRUE	reported	tpeDwQ	textfile	2	1	TRUE	0.0105649318756703	87.707	66.8100641886689	NA	NA	0.0105674771123881	8216	3.70933800127497e-08	345727	TRUE	2.89392076244319e-20
rs11578832	A	G	A	G	0.245781	-0.128051	0.227766	0.137252	FALSE	FALSE	FALSE	W06CTD	53208870	0.125549	0.0835902	outcome	TRUE	reported	textfile	345727	0.0175789	2.0203e-44	8216	exposure	TRUE	reported	tpeDwQ	textfile	2	1	TRUE	0.0232402370105934	195.437316357886	66.8100641886689	NA	NA	0.0232457641593497	8216	6.78768198968718e-06	345727	TRUE	1.04028184617279e-41
rs139300931	T	A	T	A	0.353654	-0.602395	0.0141174	0.00533686	FALSE	TRUE	FALSE	W06CTD	160206065	0.121291	0.388798	outcome	TRUE	reported	textfile	345727	0.0632577	2.26179e-08	8216	exposure	TRUE	reported	tpeDwQ	textfile	2	1	TRUE	0.00378984013329145	31.2481724328339	66.8100641886689	NA	NA	0.00379075941105165	8216	6.9435388800131e-06	345727	TRUE	1.2530070630122e-07
rs28601761	G	C	G	C	0.092688	-0.09794	0.424046	0.41086	FALSE	TRUE	TRUE	W06CTD	125487789	0.0978093	0.0591578	outcome	TRUE	reported	textfile	345727	0.015	6.44321e-10	8216	exposure	TRUE	reported	tpeDwQ	textfile	2	1	FALSE	0.0046258381834336	38.1732179679844	66.8100641886689	NA	NA	0.00462695930216222	8216	7.92796896532462e-06	345727	TRUE	4.92167684863201e-09
rs34130495	A	G	A	G	0.355884	-0.207229	0.0273514	0.0178044	FALSE	FALSE	FALSE	W06CTD	160139792	0.348005	0.220817	outcome	TRUE	reported	textfile	345727	0.0459205	9.18933e-15	8216	exposure	TRUE	reported	tpeDwQ	textfile	2	1	TRUE	0.0072573813798875	60.0479213204882	66.8100641886689	NA	NA	0.00725913562850307	8216	2.54744115253793e-06	345727	TRUE	6.05763176206188e-14
rs3798167	T	G	T	G	-0.133296	0.181475	0.201988	0.158027	FALSE	FALSE	FALSE	W06CTD	160146896	0.0220065	0.079238	outcome	TRUE	reported	textfile	345727	0.0185773	7.22173e-13	8216	exposure	TRUE	reported	tpeDwQ	textfile	2	1	TRUE	0.00622724141199317	51.4710838228135	66.8100641886689	NA	NA	0.0062287482182978	8216	1.51715245934206e-05	345727	TRUE	1.64181031093278e-11
rs662138	G	C	G	C	0.16076	0.048253	0.175225	0.147108	FALSE	TRUE	FALSE	W06CTD	160143444	0.5506	0.0808445	outcome	TRUE	reported	textfile	345727	0.0195271	1.83127e-16	8216	exposure	TRUE	reported	tpeDwQ	textfile	2	1	TRUE	0.0081818612502658	67.7602129704963	66.8100641886689	NA	NA	0.00818383712127394	8216	1.03042514400096e-06	345727	TRUE	9.43304507198766e-16
rs7750288	G	A	G	A	0.11281	-0.0480318	0.273971	0.278171	FALSE	FALSE	FALSE	W06CTD	159979115	0.460399	0.0650669	outcome	TRUE	reported	textfile	345727	0.0166175	1.13193e-11	8216	exposure	TRUE	reported	tpeDwQ	textfile	2	1	TRUE	0.00557794389019227	46.0742305870375	66.8100641886689	NA	NA	0.00557929446796161	8216	1.57618076239974e-06	345727	TRUE	4.38983541971537e-11
rs80254170	G	A	G	A	0.181707	-0.0588983	0.0752315	0.0703205	FALSE	FALSE	FALSE	W06CTD	160093251	0.597669	0.111602	outcome	TRUE	reported	textfile	345727	0.0278337	6.65094e-11	8216	exposure	TRUE	reported	tpeDwQ	textfile	2	1	TRUE	0.00516052647992752	42.6084465226735	66.8100641886689	NA	NA	0.00516177651377109	8216	8.05620352327919e-07	345727	TRUE	1.94313707544951e-10
rs998074	C	T	C	T	-0.104363	0.0206401	0.489661	0.575938	FALSE	FALSE	FALSE	W06CTD	160047351	0.725738	0.0588373	outcome	TRUE	reported	textfile	345727	0.0151291	5.2667e-12	8216	exposure	TRUE	reported	tpeDwQ	textfile	2	1	TRUE	0.0057583550879431	47.5730713297051	66.8100641886689	NA	NA	0.00575974909534691	8216	3.55948513977076e-07	345727	TRUE	1.40644265922831e-11
Taurodeoxycholic acid 3-sulfate levels
SNP	effect_allele.exposure	other_allele.exposure	effect_allele.outcome	other_allele.outcome	beta.exposure	beta.outcome	eaf.exposure	eaf.outcome	remove	palindromic	ambiguous	id.outcome	pos.outcome	pval.outcome	se.outcome	outcome	mr_keep.outcome	pval_origin.outcome	data_source.outcome	samplesize.outcome	se.exposure	pval.exposure	samplesize.exposure	exposure	mr_keep.exposure	pval_origin.exposure	id.exposure	data_source.exposure	action	SNP_index	mr_keep	R2	f	meanf	units.outcome	units.exposure	rsq.exposure	effective_n.exposure	rsq.outcome	effective_n.outcome	steiger_dir	steiger_pval
rs10505870	A	G	A	G	0.108266	-0.0496259	0.279815	0.203055	FALSE	FALSE	FALSE	yX5OJy	21018962	0.48934	0.0717801	outcome	TRUE	reported	textfile	345727	0.0183226	3.44421e-09	7333	exposure	TRUE	reported	596gk5	textfile	2	1	TRUE	0.00473876731991419	34.9053113711078	78.1779	NA	NA	0.00474005399439433	7333	1.38253867276422e-06	345727	TRUE	9.3250650810869e-09
rs11045856	G	T	G	T	-0.295772	0.065103	0.23226	0.172842	FALSE	FALSE	FALSE	yX5OJy	21197755	0.393944	0.0763685	outcome	TRUE	reported	textfile	345727	0.0189583	7.14547e-55	7333	exposure	TRUE	reported	596gk5	textfile	2	1	TRUE	0.0321257005063512	243.330678927286	78.1779	NA	NA	0.0321341832146748	7333	2.10204391199659e-06	345727	TRUE	2.22475523719029e-52
rs113092518	A	G	A	G	0.359739	0.326043	0.0229421	0.0111032	FALSE	FALSE	FALSE	yX5OJy	21149302	0.228501	0.270749	outcome	TRUE	reported	textfile	345727	0.0545366	4.21581e-11	7333	exposure	TRUE	reported	596gk5	textfile	2	1	TRUE	0.00589858625537502	43.4991191444607	78.1779	NA	NA	0.00590018597805937	7333	4.19453122374237e-06	345727	TRUE	2.19480726709801e-10
rs11519272	A	C	A	C	0.446778	-0.0701313	0.172974	0.296159	FALSE	FALSE	FALSE	yX5OJy	21209458	0.273019	0.0639805	outcome	TRUE	reported	textfile	345727	0.0210681	8.34161e-100	7333	exposure	TRUE	reported	596gk5	textfile	2	1	TRUE	0.0577832484686249	449.587628149257	78.1779	NA	NA	0.0577981014181306	7333	3.47533140281956e-06	345727	TRUE	1.93628871830317e-94
rs11615107	T	C	T	C	-0.207427	-0.127672	0.0650685	0.0487845	FALSE	FALSE	FALSE	yX5OJy	21237903	0.336889	0.132946	outcome	TRUE	reported	textfile	345727	0.0332941	4.66035e-10	7333	exposure	TRUE	reported	596gk5	textfile	2	1	TRUE	0.00526528161189419	38.8040939792917	78.1779	NA	NA	0.00526671048950925	7333	2.6675270342501e-06	345727	TRUE	1.73440152642021e-09
rs11656408	G	A	G	A	0.0964159	-0.042843	0.38965	0.445161	FALSE	FALSE	FALSE	yX5OJy	30310155	0.458785	0.0578297	outcome	TRUE	reported	textfile	345727	0.0169732	1.34316e-08	7333	exposure	TRUE	reported	596gk5	textfile	2	1	TRUE	0.00438108134776923	32.2590368250274	78.1779	NA	NA	0.00438227133065303	7333	1.58754627868302e-06	345727	TRUE	3.58926369633775e-08
rs117276944	G	A	G	A	0.379147	-0.0262295	0.032169	0.0318013	FALSE	FALSE	FALSE	yX5OJy	21347314	0.875922	0.167985	outcome	TRUE	reported	textfile	345727	0.0466415	4.32989e-16	7333	exposure	TRUE	reported	596gk5	textfile	2	1	TRUE	0.00893084403892124	66.0620071319249	78.1779	NA	NA	0.00893325873336904	7333	7.05193337490894e-08	345727	TRUE	1.15595850820587e-15
rs117428564	T	C	T	C	0.350181	0.260089	0.0186813	0.00721791	FALSE	FALSE	FALSE	yX5OJy	20960665	0.453987	0.347348	outcome	TRUE	reported	textfile	345727	0.0602765	6.26268e-09	7333	exposure	TRUE	reported	596gk5	textfile	2	1	TRUE	0.00458155708047363	33.7419857908615	78.1779	NA	NA	0.0045828012656366	7333	1.62174614763207e-06	345727	TRUE	1.73775631731423e-08
rs11829410	G	A	G	A	0.243217	-0.0376982	0.0549488	0.0906019	FALSE	FALSE	FALSE	yX5OJy	20979640	0.713571	0.102702	outcome	TRUE	reported	textfile	345727	0.0358185	1.11923e-11	7333	exposure	TRUE	reported	596gk5	textfile	2	1	TRUE	0.00624840568450532	46.0950828508213	78.1779	NA	NA	0.00625009968328478	7333	3.89719800605826e-07	345727	TRUE	2.75636401586094e-11
rs149201943	G	A	G	A	0.41122	-0.169655	0.0200219	0.0742434	FALSE	FALSE	FALSE	yX5OJy	21125421	0.13641	0.113916	outcome	TRUE	reported	textfile	345727	0.0577692	1.09235e-12	7333	exposure	TRUE	reported	596gk5	textfile	2	1	TRUE	0.0068625170905861	50.6567455733372	78.1779	NA	NA	0.00686437643042787	7333	6.41549693251952e-06	345727	TRUE	9.0482281397313e-12
rs150897358	G	C	G	C	-0.354888	0.244957	0.0215275	0.0156226	FALSE	TRUE	FALSE	yX5OJy	21214819	0.299111	0.235912	outcome	TRUE	reported	textfile	345727	0.0561966	2.69951e-10	7333	exposure	TRUE	reported	596gk5	textfile	2	1	TRUE	0.00540910413223039	39.8698023057844	78.1779	NA	NA	0.00541057182771144	7333	3.11851261042706e-06	345727	TRUE	1.10451968666073e-09
rs2972515	G	A	G	A	-0.0982232	0.0972578	0.596327	0.570318	FALSE	FALSE	FALSE	yX5OJy	47961721	0.0961258	0.0584504	outcome	TRUE	reported	textfile	345727	0.0167663	4.67388e-09	7333	exposure	TRUE	reported	596gk5	textfile	2	1	TRUE	0.00465847885409262	34.3111462285182	78.1779	NA	NA	0.00465974383064043	7333	8.00828728793683e-06	345727	TRUE	2.81494836568106e-08
rs55971546	T	C	T	C	0.357381	0.0795524	0.0495083	0.0431526	FALSE	FALSE	FALSE	yX5OJy	103065958	0.579113	0.14342	outcome	TRUE	reported	textfile	345727	0.0379918	5.11503e-21	7333	exposure	TRUE	reported	596gk5	textfile	2	1	TRUE	0.0119231828313315	88.4636212667764	78.1779	NA	NA	0.0119263968491247	7333	8.89930240185952e-07	345727	TRUE	3.27806727189648e-20
rs62128824	C	T	C	T	-0.142344	-0.0480386	0.159524	0.150623	FALSE	FALSE	FALSE	yX5OJy	47858667	0.559567	0.0823306	outcome	TRUE	reported	textfile	345727	0.0225211	2.60741e-10	7333	exposure	TRUE	reported	596gk5	textfile	2	1	TRUE	0.00541823628613479	39.9374809219623	78.1779	NA	NA	0.00541970644601366	7333	9.84752088425639e-07	345727	TRUE	7.07730459593108e-10
rs71446768	A	G	A	G	-0.220711	0.335224	0.0529765	0.0457223	FALSE	FALSE	FALSE	yX5OJy	21345020	0.00624037	0.122574	outcome	TRUE	reported	textfile	345727	0.0366314	1.68915e-09	7333	exposure	TRUE	reported	596gk5	textfile	2	1	TRUE	0.00492622809831343	36.292965615723	78.1779	NA	NA	0.00492756542031236	7333	2.16338248535254e-05	345727	TRUE	2.65279428022642e-08
rs7306128	G	A	G	A	0.243217	-0.0367914	0.0549488	0.0907363	FALSE	FALSE	FALSE	yX5OJy	20979253	0.720155	0.102697	outcome	TRUE	reported	textfile	345727	0.0358185	1.11923e-11	7333	exposure	TRUE	reported	596gk5	textfile	2	1	TRUE	0.00624840568450532	46.0950828508213	78.1779	NA	NA	0.00625009968328478	7333	3.712326516187e-07	345727	TRUE	2.73265505575912e-11
rs73079474	C	T	C	T	0.446652	-0.290058	0.0163274	0.00596024	FALSE	FALSE	FALSE	yX5OJy	21187273	0.41866	0.358651	outcome	TRUE	reported	textfile	345727	0.0641939	3.45478e-12	7333	exposure	TRUE	reported	596gk5	textfile	2	1	TRUE	0.00655860702278615	48.3985753200321	78.1779	NA	NA	0.00656038456474182	7333	1.89188179054928e-06	345727	TRUE	1.37332458228431e-11
rs955774	T	C	T	C	-0.117279	0.0508041	0.216799	0.172539	FALSE	FALSE	FALSE	yX5OJy	20762361	0.507305	0.0766229	outcome	TRUE	reported	textfile	345727	0.0198516	3.46708e-09	7333	exposure	TRUE	reported	596gk5	textfile	2	1	TRUE	0.00473702460047569	34.8924135675266	78.1779	NA	NA	0.00473831080402381	7333	1.2715956010283e-06	345727	TRUE	9.16106886485507e-09
1-palmitoyl-2-dihomo-linolenoyl-GPC (16:0/20:3n3 or 6) levels
SNP	effect_allele.exposure	other_allele.exposure	effect_allele.outcome	other_allele.outcome	beta.exposure	beta.outcome	eaf.exposure	eaf.outcome	remove	palindromic	ambiguous	id.outcome	pos.outcome	pval.outcome	se.outcome	outcome	mr_keep.outcome	pval_origin.outcome	data_source.outcome	samplesize.outcome	se.exposure	pval.exposure	samplesize.exposure	exposure	mr_keep.exposure	pval_origin.exposure	id.exposure	data_source.exposure	action	SNP_index	mr_keep	R2	f	meanf	units.outcome	units.exposure	rsq.exposure	effective_n.exposure	rsq.outcome	effective_n.outcome	steiger_dir	steiger_pval
rs117110139	A	G	A	G	0.297687	-0.202394	0.0340633	0.0106894	FALSE	FALSE	FALSE	9OQFNC	61789950	0.443671	0.264219	outcome	TRUE	reported	textfile	345727	0.0406619	2.46056e-13	8230	exposure	TRUE	reported	bOEXTl	textfile	2	1	TRUE	0.00647031486660043	53.5844590443618	101.14204497893	NA	NA	0.0064718774431152	8230	1.69721028853826e-06	345727	TRUE	1.15713648940216e-12
rs117983270	C	T	C	T	0.338476	-0.19213	0.038382	0.0409066	FALSE	FALSE	FALSE	9OQFNC	61844238	0.190667	0.14682	outcome	TRUE	reported	textfile	345727	0.0385806	1.73635e-18	8230	exposure	TRUE	reported	bOEXTl	textfile	2	1	TRUE	0.009265635193717	76.950642959488	101.14204497893	NA	NA	0.00926786654095164	8230	4.95321283459718e-06	345727	TRUE	2.73958763151955e-17
rs1741	C	G	C	G	-0.167945	0.0331824	0.293563	0.313469	FALSE	TRUE	FALSE	9OQFNC	15036494	0.593621	0.0621863	outcome	TRUE	reported	textfile	345727	0.0165611	3.63542e-24	8230	exposure	TRUE	reported	bOEXTl	textfile	2	1	TRUE	0.0123413546509324	102.813524233348	101.14204497893	NA	NA	0.0123443174630498	8230	8.2355955494716e-07	345727	TRUE	3.41899690505174e-23
rs174546	T	C	T	C	0.33129	-0.0547811	0.340448	0.414332	FALSE	FALSE	FALSE	9OQFNC	61802358	0.350014	0.058617	outcome	TRUE	reported	textfile	345727	0.015552	1.08595e-100	8230	exposure	TRUE	reported	bOEXTl	textfile	2	1	TRUE	0.0522559092277049	453.668480037886	101.14204497893	NA	NA	0.0522679472928771	8230	2.52628555902584e-06	345727	TRUE	2.26559880129124e-95
rs2107617	C	G	C	G	0.0905202	0.0148109	0.479013	0.482479	FALSE	TRUE	TRUE	9OQFNC	61714167	0.798031	0.0578785	outcome	TRUE	reported	textfile	345727	0.0152251	2.75662e-09	8230	exposure	TRUE	reported	bOEXTl	textfile	2	1	FALSE	0.00427670735390296	35.3398864602241	101.14204497893	NA	NA	0.00427774245664999	8230	1.89407641940585e-07	345727	TRUE	5.46400734867052e-09
rs35429473	G	A	G	A	0.147361	-0.0760035	0.13352	0.13081	FALSE	FALSE	FALSE	9OQFNC	15085931	0.379614	0.0865044	outcome	TRUE	reported	textfile	345727	0.0226212	7.30356e-11	8230	exposure	TRUE	reported	bOEXTl	textfile	2	1	TRUE	0.00512979994112226	42.4256289042088	101.14204497893	NA	NA	0.00513104045612714	8230	2.23284734895583e-06	345727	TRUE	3.00980170314472e-10
rs518511	G	T	G	T	-0.138793	0.0393652	0.102102	0.059938	FALSE	FALSE	FALSE	9OQFNC	61863982	0.749354	0.123212	outcome	TRUE	reported	textfile	345727	0.0249662	2.70928e-08	8230	exposure	TRUE	reported	bOEXTl	textfile	2	1	TRUE	0.00374112829974795	30.8975955193176	101.14204497893	NA	NA	0.00374203426204	8230	2.95248701770357e-07	345727	TRUE	5.27530381105216e-08
rs695186	T	C	T	C	0.154987	-0.175281	0.253988	0.137767	FALSE	FALSE	FALSE	9OQFNC	61760455	0.0365738	0.083847	outcome	TRUE	reported	textfile	345727	0.0173955	5.12118e-19	8230	exposure	TRUE	reported	bOEXTl	textfile	2	1	TRUE	0.00955318168719757	79.3617360053319	101.14204497893	NA	NA	0.00955548161340933	8230	1.26403282707967e-05	345727	TRUE	2.40990307851153e-17
rs740006	C	T	C	T	-0.15067	-0.0198304	0.0988113	0.153675	FALSE	FALSE	FALSE	9OQFNC	61790396	0.808485	0.081815	outcome	TRUE	reported	textfile	345727	0.0253792	2.90712e-09	8230	exposure	TRUE	reported	bOEXTl	textfile	2	1	TRUE	0.00426424341750306	35.2364516462037	101.14204497893	NA	NA	0.00426527551649296	8230	1.69928498666349e-07	345727	TRUE	5.68189272956456e-09
1-(1-enyl-palmitoyl)-2-palmitoleoyl-GPC (P-16:0/16:1) levels
SNP	effect_allele.exposure	other_allele.exposure	effect_allele.outcome	other_allele.outcome	beta.exposure	beta.outcome	eaf.exposure	eaf.outcome	remove	palindromic	ambiguous	id.outcome	pos.outcome	pval.outcome	se.outcome	outcome	mr_keep.outcome	pval_origin.outcome	data_source.outcome	samplesize.outcome	se.exposure	pval.exposure	samplesize.exposure	exposure	mr_keep.exposure	pval_origin.exposure	id.exposure	data_source.exposure	action	SNP_index	mr_keep	R2	f	meanf	units.outcome	units.exposure	rsq.exposure	effective_n.exposure	rsq.outcome	effective_n.outcome	steiger_dir	steiger_pval
rs102275	C	T	C	T	-0.110206	-0.0537175	0.34613	0.416398	FALSE	FALSE	FALSE	dM6yi1	61790331	0.359258	0.0585937	outcome	TRUE	reported	textfile	345727	0.015681	2.09533e-12	8083	exposure	TRUE	reported	uBapRM	textfile	2	1	TRUE	0.00607357818650186	49.3805016628596	76.104239485388	NA	NA	0.00607507222950652	8083	2.43107242693657e-06	345727	TRUE	1.03715406846641e-11
rs1077989	C	A	C	A	-0.329199	0.078156	0.477125	0.454618	FALSE	FALSE	FALSE	dM6yi1	67509105	0.18128	0.0584639	outcome	TRUE	reported	textfile	345727	0.0145526	2.67234e-113	8083	exposure	TRUE	reported	uBapRM	textfile	2	1	TRUE	0.0595393230569753	511.597434554476	76.104239485388	NA	NA	0.0595531811356701	8083	5.16911331355663e-06	345727	TRUE	1.38609759982664e-106
rs112576474	A	G	A	G	-0.155634	0.066885	0.0971907	0.0829511	FALSE	FALSE	FALSE	dM6yi1	67555070	0.525021	0.105227	outcome	TRUE	reported	textfile	345727	0.025503	1.04356e-09	8083	exposure	TRUE	reported	uBapRM	textfile	2	1	TRUE	0.00458624736398867	37.2322211243796	76.104239485388	NA	NA	0.00458737722626247	8083	1.16861590316459e-06	345727	TRUE	3.00294975294365e-09
rs116943761	A	C	A	C	-0.208682	0.124464	0.0666167	0.0806671	FALSE	FALSE	FALSE	dM6yi1	67507335	0.251432	0.108524	outcome	TRUE	reported	textfile	345727	0.0299285	3.10958e-12	8083	exposure	TRUE	reported	uBapRM	textfile	2	1	TRUE	0.00597892482156947	48.6063049261103	76.104239485388	NA	NA	0.00598039572083568	8083	3.80455165790472e-06	345727	TRUE	1.92014458428965e-11
rs1260326	C	T	C	T	0.0955316	-0.123553	0.586186	0.650088	FALSE	FALSE	FALSE	dM6yi1	27508073	0.0417359	0.0606798	outcome	TRUE	reported	textfile	345727	0.0152093	3.3614e-10	8083	exposure	TRUE	reported	uBapRM	textfile	2	1	TRUE	0.00485722771798897	39.4428400450117	76.104239485388	NA	NA	0.0048584240128154	8083	1.19917430818088e-05	345727	TRUE	3.72722389932224e-09
rs12880237	G	A	G	A	0.091537	0.028995	0.674032	0.682682	FALSE	FALSE	FALSE	dM6yi1	68155101	0.644258	0.0627932	outcome	TRUE	reported	textfile	345727	0.0159724	9.98637e-09	8083	exposure	TRUE	reported	uBapRM	textfile	2	1	TRUE	0.00404687058250525	32.8356427740248	76.104239485388	NA	NA	0.00404786810493667	8083	6.16722710911677e-07	345727	TRUE	2.25546085911548e-08
rs146800521	G	A	G	A	-0.272882	-0.299649	0.0308304	0.0154936	FALSE	FALSE	FALSE	dM6yi1	68095151	0.203679	0.235732	outcome	TRUE	reported	textfile	345727	0.0428009	1.82245e-10	8083	exposure	TRUE	reported	uBapRM	textfile	2	1	TRUE	0.00500371834079393	40.6383909742138	76.104239485388	NA	NA	0.00500495053358642	8083	4.67364550989653e-06	345727	TRUE	1.03036170478413e-09
rs17104402	A	G	A	G	0.0967865	-0.0450109	0.317339	0.360815	FALSE	FALSE	FALSE	dM6yi1	67527666	0.45592	0.0603702	outcome	TRUE	reported	textfile	345727	0.0160907	1.79814e-09	8083	exposure	TRUE	reported	uBapRM	textfile	2	1	TRUE	0.00445622874175363	36.1719750570061	76.104239485388	NA	NA	0.00445732671623063	8083	1.60789868774984e-06	345727	TRUE	5.59248268415403e-09
rs17231506	T	C	T	C	0.124433	-0.0912848	0.325087	0.278327	FALSE	FALSE	FALSE	dM6yi1	56960616	0.154561	0.0641223	outcome	TRUE	reported	textfile	345727	0.0158322	3.8571e-15	8083	exposure	TRUE	reported	uBapRM	textfile	2	1	TRUE	0.00758419866170871	61.7562812911888	76.104239485388	NA	NA	0.00758606146692205	8083	5.86199471185348e-06	345727	TRUE	4.56663822936776e-14
rs174418	C	T	C	T	-0.0877125	-0.0255179	0.595054	0.554871	FALSE	FALSE	FALSE	dM6yi1	58395404	0.661764	0.0583296	outcome	TRUE	reported	textfile	345727	0.0155764	1.79038e-08	8083	exposure	TRUE	reported	uBapRM	textfile	2	1	TRUE	0.00390765147424523	31.7016104080225	76.104239485388	NA	NA	0.00390861481491341	8083	5.53580572132911e-07	345727	TRUE	3.8772543497103e-08
rs603424	A	G	A	G	-0.171435	0.242059	0.176266	0.116306	FALSE	FALSE	FALSE	dM6yi1	100315722	0.00403088	0.0841731	outcome	TRUE	reported	textfile	345727	0.019535	1.69719e-18	8083	exposure	TRUE	reported	uBapRM	textfile	2	1	TRUE	0.00943802721299988	76.9953824228341	76.104239485388	NA	NA	0.00944034101797886	8083	2.3919640706888e-05	345727	TRUE	1.93305542494918e-16
rs72721018	G	A	G	A	0.161865	0.0207441	0.180603	0.170326	FALSE	FALSE	FALSE	dM6yi1	67526957	0.790054	0.0779151	outcome	TRUE	reported	textfile	345727	0.0198915	4.03918e-16	8083	exposure	TRUE	reported	uBapRM	textfile	2	1	TRUE	0.00812559068594916	66.2008190921728	76.104239485388	NA	NA	0.0081275853770156	8083	2.05028887671784e-07	345727	TRUE	1.3248383779494e-15
rs72721029	G	A	G	A	-0.148027	0.137963	0.0971308	0.0743529	FALSE	FALSE	FALSE	dM6yi1	67542085	0.210068	0.110073	outcome	TRUE	reported	textfile	345727	0.0253512	5.24998e-09	8083	exposure	TRUE	reported	uBapRM	textfile	2	1	TRUE	0.00420033788929463	34.0861036359906	76.104239485388	NA	NA	0.00420137308065777	8083	4.54392227426187e-06	345727	TRUE	2.43056134685425e-08
rs74575714	C	T	C	T	-0.275785	-0.252314	0.0266972	0.0133698	FALSE	FALSE	FALSE	dM6yi1	67506230	0.319519	0.253468	outcome	TRUE	reported	textfile	345727	0.0459983	2.02795e-09	8083	exposure	TRUE	reported	uBapRM	textfile	2	1	TRUE	0.00442749454693054	35.9376973929824	76.104239485388	NA	NA	0.00442858547305575	8083	2.86618613726873e-06	345727	TRUE	7.85659380705095e-09
rs76387177	C	G	C	G	0.216962	-0.0885872	0.0652093	0.0511378	FALSE	TRUE	FALSE	dM6yi1	67501638	0.504198	0.132635	outcome	TRUE	reported	textfile	345727	0.0301698	6.41373e-13	8083	exposure	TRUE	reported	uBapRM	textfile	2	1	TRUE	0.00635740836424856	51.7029135264014	76.104239485388	NA	NA	0.00635897178010894	8083	1.29031076608426e-06	345727	TRUE	2.56256441734634e-12
rs79191249	T	G	T	G	0.205934	0.0336339	0.0935673	0.0789149	FALSE	FALSE	FALSE	dM6yi1	67496212	0.752981	0.106873	outcome	TRUE	reported	textfile	345727	0.0258638	1.68924e-15	8083	exposure	TRUE	reported	uBapRM	textfile	2	1	TRUE	0.00778226206886994	63.3817128785326	76.104239485388	NA	NA	0.00778417314017139	8083	2.86475539831383e-07	345727	TRUE	5.60629851339511e-15
1-(1-enyl-palmitoyl)-2-linoleoyl-GPE (p-16:0/18:2) levels
SNP	effect_allele.exposure	other_allele.exposure	effect_allele.outcome	other_allele.outcome	beta.exposure	beta.outcome	eaf.exposure	eaf.outcome	remove	palindromic	ambiguous	id.outcome	pos.outcome	pval.outcome	se.outcome	outcome	mr_keep.outcome	pval_origin.outcome	data_source.outcome	samplesize.outcome	se.exposure	pval.exposure	samplesize.exposure	exposure	mr_keep.exposure	pval_origin.exposure	id.exposure	data_source.exposure	action	SNP_index	mr_keep	R2	f	meanf	units.outcome	units.exposure	rsq.exposure	effective_n.exposure	rsq.outcome	effective_n.outcome	steiger_dir	steiger_pval
rs174580	G	A	G	A	0.171168	-0.0617886	0.350249	0.415868	FALSE	FALSE	FALSE	9ozVxg	61839170	0.291329	0.0585557	outcome	TRUE	reported	textfile	345727	0.0160437	1.42392e-26	8254	exposure	TRUE	reported	YNqDdp	textfile	2	1	TRUE	0.0136026498750123	113.797007620081	79.6630900016869	NA	NA	0.0136059018317637	8254	3.22066958574678e-06	345727	TRUE	3.85115231769152e-25
rs3826884	A	G	A	G	-0.187589	0.15381	0.182216	0.155364	FALSE	FALSE	FALSE	9ozVxg	55226813	0.0537242	0.0797333	outcome	TRUE	reported	textfile	345727	0.0199148	4.52868e-21	8254	exposure	TRUE	reported	YNqDdp	textfile	2	1	TRUE	0.0106354220977734	88.7069388889111	79.6630900016869	NA	NA	0.0106379723359633	8254	1.07635171315799e-05	345727	TRUE	2.30990350094853e-19
rs62126340	T	C	T	C	0.110487	-0.107817	0.230797	0.267305	FALSE	FALSE	FALSE	9ozVxg	55217930	0.101312	0.0658011	outcome	TRUE	reported	textfile	345727	0.0182894	1.53136e-09	8254	exposure	TRUE	reported	YNqDdp	textfile	2	1	TRUE	0.00440192894986979	36.4853234960682	79.6630900016869	NA	NA	0.00440299112808011	8254	7.76558220545679e-06	345727	TRUE	1.09508328483951e-08
Glycosyl-N-palmitoyl-sphingosine (d18:1/16:0) levels
SNP	effect_allele.exposure	other_allele.exposure	effect_allele.outcome	other_allele.outcome	beta.exposure	beta.outcome	eaf.exposure	eaf.outcome	remove	palindromic	ambiguous	id.outcome	pos.outcome	pval.outcome	se.outcome	outcome	mr_keep.outcome	pval_origin.outcome	data_source.outcome	samplesize.outcome	se.exposure	pval.exposure	samplesize.exposure	exposure	mr_keep.exposure	pval_origin.exposure	id.exposure	data_source.exposure	action	SNP_index	mr_keep	R2	f	meanf	units.outcome	units.exposure	rsq.exposure	effective_n.exposure	rsq.outcome	effective_n.outcome	steiger_dir	steiger_pval
rs117779137	T	C	T	C	0.205923	-0.120635	0.044797	0.0489879	FALSE	FALSE	FALSE	1cpLue	8329348	0.369137	0.134323	outcome	TRUE	reported	textfile	345727	0.0376326	4.45158e-08	8245	exposure	TRUE	reported	SON602	textfile	2	1	TRUE	0.00361839774856676	29.9347685405267	73.0932141978706	NA	NA	0.00361927250333592	8245	2.33299653004268e-06	345727	TRUE	1.38512623444154e-07
rs11934749	C	T	C	T	-0.182643	0.0940285	0.859293	0.913142	FALSE	FALSE	FALSE	1cpLue	47665047	0.357877	0.10227	outcome	TRUE	reported	textfile	345727	0.0222032	1.93625e-16	8245	exposure	TRUE	reported	SON602	textfile	2	1	TRUE	0.00814019024940211	67.6502743292862	73.0932141978706	NA	NA	0.00814214922346633	8245	2.44506639637183e-06	345727	TRUE	1.48998204254735e-15
rs13306282	T	A	T	A	-0.173767	-0.263175	0.0753483	0.0494127	FALSE	TRUE	FALSE	1cpLue	47600358	0.0513511	0.135063	outcome	TRUE	reported	textfile	345727	0.0294721	3.7244e-09	8245	exposure	TRUE	reported	SON602	textfile	2	1	TRUE	0.00419850386075606	34.7541828952755	73.0932141978706	NA	NA	0.00419951826623152	8245	1.09819869808696e-05	345727	TRUE	3.29181743347848e-08
rs146612847	G	A	G	A	0.389575	-0.331933	0.0167072	0.0432409	FALSE	FALSE	FALSE	1cpLue	47562692	0.0218877	0.144803	outcome	TRUE	reported	textfile	345727	0.0598231	7.40965e-11	8245	exposure	TRUE	reported	SON602	textfile	2	1	TRUE	0.00511712030842977	42.3973751719028	73.0932141978706	NA	NA	0.00511835552111142	8245	1.51987669895653e-05	345727	TRUE	1.20056368185298e-09
rs35818294	A	C	A	C	0.333482	-0.123705	0.176294	0.200589	FALSE	FALSE	FALSE	1cpLue	47543124	0.0884627	0.0726155	outcome	TRUE	reported	textfile	345727	0.02026	7.0924e-61	8245	exposure	TRUE	reported	SON602	textfile	2	1	TRUE	0.0318151188118861	270.869778553609	73.0932141978706	NA	NA	0.0318225924693534	8245	8.3942405840458e-06	345727	TRUE	4.70786124069441e-57
rs41342544	C	T	C	T	-0.119409	0.0242616	0.232714	0.183798	FALSE	FALSE	FALSE	1cpLue	168363957	0.747152	0.0752538	outcome	TRUE	reported	textfile	345727	0.0182893	6.62525e-11	8245	exposure	TRUE	reported	SON602	textfile	2	1	TRUE	0.00514339387508816	42.616187550378	73.0932141978706	NA	NA	0.00514463539710415	8245	3.00642996184536e-07	345727	TRUE	1.58143249303029e-10
rs61756977	G	A	G	A	0.33923	-0.28352	0.0242701	0.0437543	FALSE	FALSE	FALSE	1cpLue	47800145	0.048022	0.143397	outcome	TRUE	reported	textfile	345727	0.0501393	1.32613e-11	8245	exposure	TRUE	reported	SON602	textfile	2	1	TRUE	0.00552124250500964	45.7642776437321	73.0932141978706	NA	NA	0.00552257472653838	8245	1.13071088580986e-05	345727	TRUE	1.79137877369001e-10
rs6447573	G	A	G	A	-0.184652	-0.0156788	0.365937	0.441567	FALSE	FALSE	FALSE	1cpLue	47637797	0.788876	0.058553	outcome	TRUE	reported	textfile	345727	0.0159812	7.01856e-31	8245	exposure	TRUE	reported	SON602	textfile	2	1	TRUE	0.0159339282532305	133.470073161081	73.0932141978706	NA	NA	0.0159377326879178	8245	2.07394131121142e-07	345727	TRUE	7.68717386619566e-30
rs6447611	G	T	G	T	0.098884	-0.0174424	0.489083	0.453122	FALSE	FALSE	FALSE	1cpLue	48058017	0.765158	0.0583913	outcome	TRUE	reported	textfile	345727	0.0155778	2.18469e-10	8245	exposure	TRUE	reported	SON602	textfile	2	1	TRUE	0.00486330921550737	40.2841722495677	73.0932141978706	NA	NA	0.00486448346074048	8245	2.58098391243483e-07	345727	TRUE	4.89759217647224e-10
rs6846205	G	A	G	A	0.114889	-0.0947222	0.720133	0.627078	FALSE	FALSE	FALSE	1cpLue	47542379	0.118403	0.0606605	outcome	TRUE	reported	textfile	345727	0.0174666	4.78067e-11	8245	exposure	TRUE	reported	SON602	textfile	2	1	TRUE	0.00522007211887966	43.2548479014618	73.0932141978706	NA	NA	0.0052213320524934	8245	7.05273771295089e-06	345727	TRUE	3.94303704361595e-10
rs7659411	T	C	T	C	0.116376	0.0372347	0.356362	0.326043	FALSE	FALSE	FALSE	1cpLue	47411104	0.549564	0.0622222	outcome	TRUE	reported	textfile	345727	0.0159791	3.26516e-13	8245	exposure	TRUE	reported	SON602	textfile	2	1	TRUE	0.00639214442315603	53.0294181797561	73.0932141978706	NA	NA	0.0063936854337256	8245	1.03579487561714e-06	345727	TRUE	1.26323335098382e-12
Methylsuccinoylcarnitine levels
SNP	effect_allele.exposure	other_allele.exposure	effect_allele.outcome	other_allele.outcome	beta.exposure	beta.outcome	eaf.exposure	eaf.outcome	remove	palindromic	ambiguous	id.outcome	pos.outcome	pval.outcome	se.outcome	outcome	mr_keep.outcome	pval_origin.outcome	data_source.outcome	samplesize.outcome	se.exposure	pval.exposure	samplesize.exposure	exposure	mr_keep.exposure	pval_origin.exposure	id.exposure	data_source.exposure	action	SNP_index	mr_keep	R2	f	meanf	units.outcome	units.exposure	rsq.exposure	effective_n.exposure	rsq.outcome	effective_n.outcome	steiger_dir	steiger_pval
rs11065180	A	G	A	G	0.209002	0.16425	0.0499187	0.034424	FALSE	FALSE	FALSE	LRk3BD	120632730	0.297345	0.157607	outcome	TRUE	reported	textfile	345727	0.0352519	3.0512e-09	8004	exposure	TRUE	reported	PlNvKV	textfile	2	1	TRUE	0.00437245800572956	35.1420661704126	78.0661436030517	NA	NA	0.00437354606742894	8004	3.14143155594698e-06	345727	TRUE	1.19811423681345e-08
rs11206134	T	C	T	C	0.166218	-0.0402325	0.376963	0.415309	FALSE	FALSE	FALSE	LRk3BD	53280031	0.491682	0.0585085	outcome	TRUE	reported	textfile	345727	0.0160393	3.64735e-25	8004	exposure	TRUE	reported	PlNvKV	textfile	2	1	TRUE	0.0132400527944855	107.368466628092	78.0661436030517	NA	NA	0.0132433181557859	8004	1.36768074402598e-06	345727	TRUE	4.57559174259249e-24
rs1171615	T	C	T	C	0.104973	0.0719797	0.769503	0.841298	FALSE	FALSE	FALSE	LRk3BD	59709332	0.360332	0.0786893	outcome	TRUE	reported	textfile	345727	0.0186439	1.79753e-08	8004	exposure	TRUE	reported	PlNvKV	textfile	2	1	TRUE	0.00394509880978802	31.6937155152808	78.0661436030517	NA	NA	0.00394608094703634	8004	2.42023124975023e-06	345727	TRUE	5.80229966619673e-08
rs11753995	A	G	A	G	0.167972	0.0717216	0.165307	0.141382	FALSE	FALSE	FALSE	LRk3BD	160154334	0.383079	0.0822271	outcome	TRUE	reported	textfile	345727	0.0205925	3.43575e-16	8004	exposure	TRUE	reported	PlNvKV	textfile	2	1	TRUE	0.00824429012829784	66.5192133001922	78.0661436030517	NA	NA	0.00824633369364671	8004	2.20058551717573e-06	345727	TRUE	2.3494225496049e-15
rs12208357	T	C	T	C	0.239199	-0.109626	0.0692172	0.056886	FALSE	FALSE	FALSE	LRk3BD	160122116	0.373995	0.123312	outcome	TRUE	reported	textfile	345727	0.0299842	1.49329e-15	8004	exposure	TRUE	reported	PlNvKV	textfile	2	1	TRUE	0.00788836955401831	63.6246277476649	78.0661436030517	NA	NA	0.00789032559694503	8004	2.28604447103207e-06	345727	TRUE	9.7750195276846e-15
rs1799822	G	A	G	A	-0.309205	-0.12817	0.227421	0.137599	FALSE	FALSE	FALSE	LRk3BD	53213557	0.124379	0.0834087	outcome	TRUE	reported	textfile	345727	0.0180659	1.13871e-65	8004	exposure	TRUE	reported	PlNvKV	textfile	2	1	TRUE	0.0353066111522537	292.86352089319	78.0661436030517	NA	NA	0.0353151239625018	8004	6.82993093973423e-06	345727	TRUE	8.65564403514327e-62
rs1799958	A	G	A	G	0.323775	-0.109447	0.266162	0.262145	FALSE	FALSE	FALSE	LRk3BD	120738280	0.0977665	0.0660999	outcome	TRUE	reported	textfile	345727	0.0170223	1.15243e-80	8004	exposure	TRUE	reported	PlNvKV	textfile	2	1	TRUE	0.04324575289542	361.694255046588	78.0661436030517	NA	NA	0.0432560940877567	8004	7.9299763021555e-06	345727	TRUE	9.91998422442576e-76
rs190523815	T	C	T	C	-0.325677	-0.412538	0.0199699	0.00489717	FALSE	FALSE	FALSE	LRk3BD	53251926	0.312455	0.40842	outcome	TRUE	reported	textfile	345727	0.0547713	2.74558e-09	8004	exposure	TRUE	reported	PlNvKV	textfile	2	1	TRUE	0.00439791465437556	35.3475686544954	78.0661436030517	NA	NA	0.00439900902283048	8004	2.95108588329517e-06	345727	TRUE	1.0534467375455e-08
rs2393794	C	T	C	T	0.118695	-0.0574052	0.185763	0.158423	FALSE	FALSE	FALSE	LRk3BD	120941173	0.473539	0.0800929	outcome	TRUE	reported	textfile	345727	0.0199116	2.5054e-09	8004	exposure	TRUE	reported	PlNvKV	textfile	2	1	TRUE	0.00441999336682904	35.5258107693176	78.0661436030517	NA	NA	0.00442109320491057	8004	1.48587747941999e-06	345727	TRUE	7.4355386517289e-09
rs2782500	A	G	A	G	-0.167063	0.0752604	0.14057	0.109023	FALSE	FALSE	FALSE	LRk3BD	53298963	0.42191	0.093711	outcome	TRUE	reported	textfile	345727	0.0221703	4.86774e-14	8004	exposure	TRUE	reported	PlNvKV	textfile	2	1	TRUE	0.00704433804272647	56.7686908666047	78.0661436030517	NA	NA	0.00704608628142407	8004	1.86560760862253e-06	345727	TRUE	2.4852956740713e-13
rs2788032	C	A	C	A	-0.150182	0.0157082	0.089362	0.0972845	FALSE	FALSE	FALSE	LRk3BD	53311959	0.874552	0.0994956	outcome	TRUE	reported	textfile	345727	0.0272102	3.40272e-08	8004	exposure	TRUE	reported	PlNvKV	textfile	2	1	TRUE	0.00379153828520462	30.4553620293313	78.0661436030517	NA	NA	0.00379248233892699	8004	7.20965157842341e-08	345727	TRUE	5.66683410840963e-08
rs34130495	A	G	A	G	0.274842	-0.207229	0.0271386	0.0178044	FALSE	FALSE	FALSE	LRk3BD	160139792	0.348005	0.220817	outcome	TRUE	reported	textfile	345727	0.0476272	7.89496e-09	8004	exposure	TRUE	reported	PlNvKV	textfile	2	1	TRUE	0.0041432951527941	33.2925888346008	78.0661436030517	NA	NA	0.00414432642597211	8004	2.54744115253793e-06	345727	TRUE	2.70380599790275e-08
rs34179846	C	T	C	T	0.184702	-0.0784864	0.105517	0.0959984	FALSE	FALSE	FALSE	LRk3BD	120479919	0.432631	0.100021	outcome	TRUE	reported	textfile	345727	0.0248768	1.13073e-13	8004	exposure	TRUE	reported	PlNvKV	textfile	2	1	TRUE	0.00684015963005872	55.1119317705614	78.0661436030517	NA	NA	0.00684185754563789	8004	1.78104493009947e-06	345727	TRUE	5.4595033005209e-13
rs3798167	T	G	T	G	-0.147175	0.181475	0.202168	0.158027	FALSE	FALSE	FALSE	LRk3BD	160146896	0.0220065	0.079238	outcome	TRUE	reported	textfile	345727	0.0191768	1.65903e-14	8004	exposure	TRUE	reported	PlNvKV	textfile	2	1	TRUE	0.00730507255721201	58.8853523744629	78.0661436030517	NA	NA	0.00730688502790232	8004	1.51715245934206e-05	345727	TRUE	4.71925507821014e-13
rs6011998	T	C	T	C	-0.272131	0.0346652	0.0431111	0.0785845	FALSE	FALSE	FALSE	LRk3BD	46641228	0.748599	0.108164	outcome	TRUE	reported	textfile	345727	0.0378575	6.56023e-13	8004	exposure	TRUE	reported	PlNvKV	textfile	2	1	TRUE	0.00641431698262585	51.658719899323	78.0661436030517	NA	NA	0.00641590987522844	8004	2.97092047662259e-07	345727	TRUE	1.78575742157236e-12
rs6124830	C	T	C	T	-0.185891	0.00205884	0.191333	0.198194	FALSE	FALSE	FALSE	LRk3BD	46608139	0.977278	0.0722865	outcome	TRUE	reported	textfile	345727	0.0196725	3.41098e-21	8004	exposure	TRUE	reported	PlNvKV	textfile	2	1	TRUE	0.0110324654101141	89.2666190992229	78.0661436030517	NA	NA	0.0110351924083724	8004	2.34638899754939e-09	345727	TRUE	1.16724557331457e-20
rs6490295	T	G	T	G	-0.11527	0.0977011	0.369389	0.339471	FALSE	FALSE	FALSE	LRk3BD	120603241	0.113497	0.0617318	outcome	TRUE	reported	textfile	345727	0.0165936	3.74072e-12	8004	exposure	TRUE	reported	PlNvKV	textfile	2	1	TRUE	0.00599285512084108	48.2439456537308	78.0661436030517	NA	NA	0.00599434398159734	8004	7.24514520665016e-06	345727	TRUE	3.53652946389944e-11
rs6490297	C	T	C	T	0.18058	-0.043078	0.25265	0.318572	FALSE	FALSE	FALSE	LRk3BD	120617356	0.489748	0.0623677	outcome	TRUE	reported	textfile	345727	0.017697	1.90258e-24	8004	exposure	TRUE	reported	PlNvKV	textfile	2	1	TRUE	0.0128416181842932	104.095	78.0661436030517	NA	NA	0.0128447865597843	8004	1.37994005979093e-06	345727	TRUE	2.24271931288403e-23
rs7138861	C	T	C	T	-0.122586	0.0230016	0.348674	0.298383	FALSE	FALSE	FALSE	LRk3BD	120618269	0.717343	0.0635384	outcome	TRUE	reported	textfile	345727	0.0163109	5.66463e-14	8004	exposure	TRUE	reported	PlNvKV	textfile	2	1	TRUE	0.00700752691787361	56.4699450568614	78.0661436030517	NA	NA	0.007009266085406	8004	3.79064046878795e-07	345727	TRUE	1.75191622076621e-13
rs73419638	G	A	G	A	-0.110959	0.0567522	0.293068	0.265837	FALSE	FALSE	FALSE	LRk3BD	121048096	0.386347	0.065514	outcome	TRUE	reported	textfile	345727	0.017038	7.39324e-11	8004	exposure	TRUE	reported	PlNvKV	textfile	2	1	TRUE	0.00527090973802459	42.4013132184208	78.0661436030517	NA	NA	0.0052722201904968	8004	2.17052824942191e-06	345727	TRUE	2.93811086980545e-10
rs74803743	C	A	C	A	-0.1699	0.145569	0.101809	0.0735727	FALSE	FALSE	FALSE	LRk3BD	120665703	0.195737	0.112514	outcome	TRUE	reported	textfile	345727	0.0256175	3.30751e-11	8004	exposure	TRUE	reported	PlNvKV	textfile	2	1	TRUE	0.00546545172100835	43.9748872949562	78.0661436030517	NA	NA	0.00546681027465329	8004	4.84163203549364e-06	345727	TRUE	2.07390659213161e-10
rs7750288	G	A	G	A	0.105033	-0.0480318	0.274734	0.278171	FALSE	FALSE	FALSE	LRk3BD	159979115	0.460399	0.0650669	outcome	TRUE	reported	textfile	345727	0.0171889	9.9305e-10	8004	exposure	TRUE	reported	PlNvKV	textfile	2	1	TRUE	0.00464330309197295	37.3290413952987	78.0661436030517	NA	NA	0.00464445823755272	8004	1.57618076239974e-06	345727	TRUE	3.1244313610355e-09
rs998074	C	T	C	T	-0.119041	0.0206401	0.490158	0.575938	FALSE	FALSE	FALSE	LRk3BD	160047351	0.725738	0.0588373	outcome	TRUE	reported	textfile	345727	0.0156575	2.89871e-14	8004	exposure	TRUE	reported	PlNvKV	textfile	2	1	TRUE	0.00716994997800857	57.7882787922804	78.0661436030517	NA	NA	0.00717172916547136	8004	3.55948513977076e-07	345727	TRUE	9.04934246410072e-14
Ascorbic acid 2-sulfate levels
SNP	effect_allele.exposure	other_allele.exposure	effect_allele.outcome	other_allele.outcome	beta.exposure	beta.outcome	eaf.exposure	eaf.outcome	remove	palindromic	ambiguous	id.outcome	pos.outcome	pval.outcome	se.outcome	outcome	mr_keep.outcome	pval_origin.outcome	data_source.outcome	samplesize.outcome	se.exposure	pval.exposure	samplesize.exposure	exposure	mr_keep.exposure	pval_origin.exposure	id.exposure	data_source.exposure	action	SNP_index	mr_keep	R2	f	meanf	units.outcome	units.exposure	rsq.exposure	effective_n.exposure	rsq.outcome	effective_n.outcome	steiger_dir	steiger_pval
rs12414218	A	G	A	G	-0.0953696	-0.0349834	0.376245	0.408917	FALSE	FALSE	FALSE	IhoN7D	87722022	0.552955	0.0589605	outcome	TRUE	reported	textfile	345727	0.0158215	1.66174e-09	8089	exposure	TRUE	reported	THY5mB	textfile	2	1	TRUE	0.00447180995042403	36.325969902749	40.1973551424713	NA	NA	0.00447291092926484	8089	1.01828767797081e-06	345727	TRUE	4.51709561153639e-09
rs142097700	A	G	A	G	-0.291921	-0.169227	0.0231185	0.0361844	FALSE	FALSE	FALSE	IhoN7D	30446984	0.284824	0.158223	outcome	TRUE	reported	textfile	345727	0.0499932	5.24465e-09	8089	exposure	TRUE	reported	THY5mB	textfile	2	1	TRUE	0.0041974660797328	34.087991374319	40.1973551424713	NA	NA	0.00419849979879283	8089	3.3087797504226e-06	345727	TRUE	2.07044779109939e-08
rs144009214	T	C	T	C	-0.392398	-0.253684	0.0171599	0.0215824	FALSE	FALSE	FALSE	IhoN7D	30343759	0.203897	0.199668	outcome	TRUE	reported	textfile	345727	0.0579718	1.29879e-11	8089	exposure	TRUE	reported	THY5mB	textfile	2	1	TRUE	0.00563212454290878	45.8049704769135	40.1973551424713	NA	NA	0.00563350957961345	8089	4.6691347215448e-06	345727	TRUE	8.45963721314912e-11
rs2289292	T	C	T	C	-0.0941514	-0.0781808	0.337244	0.42709	FALSE	FALSE	FALSE	IhoN7D	30086309	0.181533	0.0585164	outcome	TRUE	reported	textfile	345727	0.0161065	5.04847e-09	8089	exposure	TRUE	reported	THY5mB	textfile	2	1	TRUE	0.00420654599777979	34.162041683766	40.1973551424713	NA	NA	0.00420758194352254	8089	5.16311731068682e-06	345727	TRUE	2.51869925255901e-08
rs61764220	C	T	C	T	-0.277066	0.0877675	0.0338574	0.0425371	FALSE	FALSE	FALSE	IhoN7D	30116567	0.547762	0.146007	outcome	TRUE	reported	textfile	345727	0.0415755	2.66168e-11	8089	exposure	TRUE	reported	THY5mB	textfile	2	1	TRUE	0.00546032866061818	44.400117110412	40.1973551424713	NA	NA	0.00546167168179741	8089	1.04517463496215e-06	345727	TRUE	8.56783944799778e-11
rs8050812	C	T	C	T	-0.117763	-0.0839919	0.731715	0.729199	FALSE	FALSE	FALSE	IhoN7D	30374516	0.200152	0.0655615	outcome	TRUE	reported	textfile	345727	0.0172855	9.57275e-12	8089	exposure	TRUE	reported	THY5mB	textfile	2	1	TRUE	0.00570524294403077	46.403040306668	40.1973551424713	NA	NA	0.00570664585862036	8089	4.74727293749147e-06	345727	TRUE	6.40337492237861e-11
Glycosyl-N-behenoyl-sphingadienine (d18:2/22:0) levels
SNP	effect_allele.exposure	other_allele.exposure	effect_allele.outcome	other_allele.outcome	beta.exposure	beta.outcome	eaf.exposure	eaf.outcome	remove	palindromic	ambiguous	id.outcome	pos.outcome	pval.outcome	se.outcome	outcome	mr_keep.outcome	pval_origin.outcome	data_source.outcome	samplesize.outcome	se.exposure	pval.exposure	samplesize.exposure	exposure	mr_keep.exposure	pval_origin.exposure	id.exposure	data_source.exposure	action	SNP_index	mr_keep	R2	f	meanf	units.outcome	units.exposure	rsq.exposure	effective_n.exposure	rsq.outcome	effective_n.outcome	steiger_dir	steiger_pval
rs11934749	C	T	C	T	-0.150758	0.0940285	0.859358	0.913142	FALSE	FALSE	FALSE	pyQXPQ	47665047	0.357877	0.10227	outcome	TRUE	reported	textfile	345727	0.0217883	4.54148e-12	8232	exposure	TRUE	reported	W5H7V3	textfile	2	1	TRUE	0.00578216167978871	47.8639477089472	79.7384272836007	NA	NA	0.00578355869563521	8232	2.44506639637183e-06	345727	TRUE	2.21503271925473e-11
rs146612847	G	A	G	A	0.441566	-0.331933	0.0167336	0.0432409	FALSE	FALSE	FALSE	pyQXPQ	47562692	0.0218877	0.144803	outcome	TRUE	reported	textfile	345727	0.0585665	4.71541e-14	8232	exposure	TRUE	reported	W5H7V3	textfile	2	1	TRUE	0.00685801907238539	56.8312467397806	79.7384272836007	NA	NA	0.00685967423041593	8232	1.51987669895653e-05	345727	TRUE	1.31345348096496e-12
rs1567217	A	G	A	G	0.176315	-0.102361	0.270079	0.235613	FALSE	FALSE	FALSE	pyQXPQ	48066766	0.13222	0.0679954	outcome	TRUE	reported	textfile	345727	0.017166	9.50556e-25	8232	exposure	TRUE	reported	W5H7V3	textfile	2	1	TRUE	0.0126533235553788	105.471416823682	79.7384272836007	NA	NA	0.0126563595647452	8232	6.55505502979103e-06	345727	TRUE	4.18945080201203e-23
rs28729388	T	C	T	C	-0.176427	-0.0167521	0.363382	0.438769	FALSE	FALSE	FALSE	pyQXPQ	47636846	0.774942	0.058591	outcome	TRUE	reported	textfile	345727	0.0157004	2.68039e-29	8232	exposure	TRUE	reported	W5H7V3	textfile	2	1	TRUE	0.015107483901962	126.241788297608	79.7384272836007	NA	NA	0.0151110997447824	8232	2.3645353160189e-07	345727	TRUE	2.64183887115872e-28
rs35818294	A	C	A	C	0.300353	-0.123705	0.176799	0.200589	FALSE	FALSE	FALSE	pyQXPQ	47543124	0.0884627	0.0726155	outcome	TRUE	reported	textfile	345727	0.0198764	1.36982e-51	8232	exposure	TRUE	reported	W5H7V3	textfile	2	1	TRUE	0.0269898518234849	228.287938130512	79.7384272836007	NA	NA	0.0269962336527625	8232	8.3942405840458e-06	345727	TRUE	2.59148632925103e-48
rs3750434	A	G	A	G	0.103985	-0.0694191	0.425369	0.46408	FALSE	FALSE	FALSE	pyQXPQ	35739879	0.231986	0.0580787	outcome	TRUE	reported	textfile	345727	0.0153983	1.44811e-11	8232	exposure	TRUE	reported	W5H7V3	textfile	2	1	TRUE	0.0055092341678749	45.5921751708494	79.7384272836007	NA	NA	0.00551056560777078	8232	4.1322977252429e-06	345727	TRUE	8.85815003370948e-11
rs61756977	G	A	G	A	0.268609	-0.28352	0.0243085	0.0437543	FALSE	FALSE	FALSE	pyQXPQ	47800145	0.048022	0.143397	outcome	TRUE	reported	textfile	345727	0.049177	4.7058e-08	8232	exposure	TRUE	reported	W5H7V3	textfile	2	1	TRUE	0.00361110878934254	29.8271343633495	79.7384272836007	NA	NA	0.00361198316735595	8232	1.13071088580986e-05	345727	TRUE	3.52133497671559e-07
rs6846205	G	A	G	A	0.0980816	-0.0947222	0.720333	0.627078	FALSE	FALSE	FALSE	pyQXPQ	47542379	0.118403	0.0606605	outcome	TRUE	reported	textfile	345727	0.0171333	1.03663e-08	8232	exposure	TRUE	reported	W5H7V3	textfile	2	1	TRUE	0.00396517360987128	32.7632909458717	79.7384272836007	NA	NA	0.00396613337832874	8232	7.05273771295089e-06	345727	TRUE	6.11185080018809e-08
rs6846979	G	A	G	A	-0.122638	-0.0282013	0.219435	0.250992	FALSE	FALSE	FALSE	pyQXPQ	47755798	0.67693	0.0676848	outcome	TRUE	reported	textfile	345727	0.0183271	2.20699e-11	8232	exposure	TRUE	reported	W5H7V3	textfile	2	1	TRUE	0.00541005056371117	44.7669073718053	79.7384272836007	NA	NA	0.00541135816391589	8232	5.02140156671306e-07	345727	TRUE	6.01102684397195e-11
Glycosyl ceramide (d18:1/20:0, d16:1/22:0) levels
SNP	effect_allele.exposure	other_allele.exposure	effect_allele.outcome	other_allele.outcome	beta.exposure	beta.outcome	eaf.exposure	eaf.outcome	remove	palindromic	ambiguous	id.outcome	pos.outcome	pval.outcome	se.outcome	outcome	mr_keep.outcome	pval_origin.outcome	data_source.outcome	samplesize.outcome	se.exposure	pval.exposure	samplesize.exposure	exposure	mr_keep.exposure	pval_origin.exposure	id.exposure	data_source.exposure	action	SNP_index	mr_keep	R2	f	meanf	units.outcome	units.exposure	rsq.exposure	effective_n.exposure	rsq.outcome	effective_n.outcome	steiger_dir	steiger_pval
rs11934749	C	T	C	T	-0.15188	0.0940285	0.859394	0.913142	FALSE	FALSE	FALSE	Xu1vW4	47665047	0.357877	0.10227	outcome	TRUE	reported	textfile	345727	0.0218962	4.02289e-12	8259	exposure	TRUE	reported	iIP8UY	textfile	2	1	TRUE	0.00579179990043893	48.1014859595155	69.9929545204994	NA	NA	0.00579319465564692	8259	2.44506639637183e-06	345727	TRUE	1.9794712218313e-11
rs146612847	G	A	G	A	0.447798	-0.331933	0.0167394	0.0432409	FALSE	FALSE	FALSE	Xu1vW4	47562692	0.0218877	0.144803	outcome	TRUE	reported	textfile	345727	0.0587976	2.6182e-14	8259	exposure	TRUE	reported	iIP8UY	textfile	2	1	TRUE	0.00697394117054052	57.9882388112057	69.9929545204994	NA	NA	0.00697561860632028	8259	1.51987669895653e-05	345727	TRUE	7.6510388603546e-13
rs148417916	T	G	T	G	-0.307362	0.0272462	0.0354766	0.0490751	FALSE	FALSE	FALSE	Xu1vW4	8257849	0.841065	0.13587	outcome	TRUE	reported	textfile	345727	0.0413059	9.98401e-14	8259	exposure	TRUE	reported	iIP8UY	textfile	2	1	TRUE	0.00665957953668617	55.3568012552738	69.9929545204994	NA	NA	0.00666118186655567	8259	1.16314509561456e-07	345727	TRUE	2.58218100231296e-13
rs1871194	A	C	A	C	0.183716	-0.0412576	0.538395	0.433226	FALSE	FALSE	FALSE	Xu1vW4	8218935	0.481694	0.0586394	outcome	TRUE	reported	textfile	345727	0.0159503	1.07088e-30	8259	exposure	TRUE	reported	iIP8UY	textfile	2	1	TRUE	0.0158091352126156	132.632839950985	69.9929545204994	NA	NA	0.0158129039293108	8259	1.43184985194073e-06	345727	TRUE	2.46448751451702e-29
rs2279965	G	A	G	A	0.13295	-0.0915555	0.275233	0.238597	FALSE	FALSE	FALSE	Xu1vW4	48074231	0.175699	0.0676128	outcome	TRUE	reported	textfile	345727	0.017138	8.65472e-15	8259	exposure	TRUE	reported	iIP8UY	textfile	2	1	TRUE	0.0072339558635494	60.1660118394598	69.9929545204994	NA	NA	0.00723569538472234	8259	5.30368773155605e-06	345727	TRUE	9.32920134943793e-14
rs28133	C	T	C	T	-0.176008	-0.102456	0.921566	0.872868	FALSE	FALSE	FALSE	Xu1vW4	8262618	0.241108	0.0874032	outcome	TRUE	reported	textfile	345727	0.0284936	6.52913e-10	8259	exposure	TRUE	reported	iIP8UY	textfile	2	1	TRUE	0.00459876142912701	38.1474039301169	69.9929545204994	NA	NA	0.0045998702114265	8259	3.97454679908349e-06	345727	TRUE	3.20840586777462e-09
rs28729388	T	C	T	C	-0.174317	-0.0167521	0.364437	0.438769	FALSE	FALSE	FALSE	Xu1vW4	47636846	0.774942	0.058591	outcome	TRUE	reported	textfile	345727	0.015763	1.99045e-28	8259	exposure	TRUE	reported	iIP8UY	textfile	2	1	TRUE	0.0145911899007523	122.263423845761	69.9929545204994	NA	NA	0.0145946725787859	8259	2.3645353160189e-07	345727	TRUE	1.83165896989231e-27
rs35818294	A	C	A	C	0.29805	-0.123705	0.176848	0.200589	FALSE	FALSE	FALSE	Xu1vW4	47543124	0.0884627	0.0726155	outcome	TRUE	reported	textfile	345727	0.0199722	2.32528e-50	8259	exposure	TRUE	reported	iIP8UY	textfile	2	1	TRUE	0.0262568950863919	222.649261015895	69.9929545204994	NA	NA	0.0262630879670849	8259	8.3942405840458e-06	345727	TRUE	3.78324788429386e-47
rs3750434	A	G	A	G	0.118903	-0.0694191	0.425553	0.46408	FALSE	FALSE	FALSE	Xu1vW4	35739879	0.231986	0.0580787	outcome	TRUE	reported	textfile	345727	0.015437	1.33476e-14	8259	exposure	TRUE	reported	iIP8UY	textfile	2	1	TRUE	0.00713220429232715	59.3136478958617	69.9929545204994	NA	NA	0.00713391952151957	8259	4.1322977252429e-06	345727	TRUE	1.1709534956709e-13
rs438568	G	A	G	A	-0.115929	-0.0250086	0.615394	0.66432	FALSE	FALSE	FALSE	Xu1vW4	12978039	0.681874	0.0610102	outcome	TRUE	reported	textfile	345727	0.0156794	1.42802e-13	8259	exposure	TRUE	reported	iIP8UY	textfile	2	1	TRUE	0.00657555893606953	54.6537692156822	69.9929545204994	NA	NA	0.0065771411839941	8259	4.86007383131917e-07	345727	TRUE	4.62451196232396e-13
rs59776273	T	C	T	C	0.117158	-0.108673	0.166667	0.153148	FALSE	FALSE	FALSE	Xu1vW4	47790280	0.17874	0.0808192	outcome	TRUE	reported	textfile	345727	0.0204753	1.05327e-08	8259	exposure	TRUE	reported	iIP8UY	textfile	2	1	TRUE	0.00394855013821954	32.7324241090187	69.9929545204994	NA	NA	0.00394950277363882	8259	5.22975280509635e-06	345727	TRUE	5.16972499946219e-08
rs6846205	G	A	G	A	0.0952207	-0.0947222	0.720088	0.627078	FALSE	FALSE	FALSE	Xu1vW4	47542379	0.118403	0.0606605	outcome	TRUE	reported	textfile	345727	0.0172125	3.16504e-08	8259	exposure	TRUE	reported	iIP8UY	textfile	2	1	TRUE	0.00369182461377134	30.5963522020611	69.9929545204994	NA	NA	0.00369271554068321	8259	7.05273771295089e-06	345727	TRUE	1.74157918131877e-07
rs7160525	A	G	A	G	0.159149	0.100418	0.164474	0.131643	FALSE	FALSE	FALSE	Xu1vW4	63765502	0.243041	0.0860168	outcome	TRUE	reported	textfile	345727	0.0203875	5.89287e-15	8259	exposure	TRUE	reported	iIP8UY	textfile	2	1	TRUE	0.00732419420077829	60.9220766362248	69.9929545204994	NA	NA	0.00732595526108633	8259	3.94206765678769e-06	345727	TRUE	5.21497218021762e-14
rs72995498	A	C	A	C	0.158496	-0.0108746	0.108838	0.100932	FALSE	FALSE	FALSE	Xu1vW4	8196972	0.909874	0.0960679	outcome	TRUE	reported	textfile	345727	0.0242919	6.81735e-11	8259	exposure	TRUE	reported	iIP8UY	textfile	2	1	TRUE	0.00512806306845865	42.5606705591261	69.9929545204994	NA	NA	0.00512929881018098	8259	3.70628819654115e-08	345727	TRUE	1.31955110291866e-10
rs79904219	T	C	T	C	-0.108789	0.0203113	0.198149	0.174076	FALSE	FALSE	FALSE	Xu1vW4	8170590	0.790455	0.0764391	outcome	TRUE	reported	textfile	345727	0.0192864	1.69375e-08	8259	exposure	TRUE	reported	iIP8UY	textfile	2	1	TRUE	0.0038376933389069	31.8099105813034	69.9929545204994	NA	NA	0.00383861933185714	8259	2.04227131564056e-07	345727	TRUE	3.20138561645956e-08
Arachidonoylcarnitine (C20:4) levels
SNP	effect_allele.exposure	other_allele.exposure	effect_allele.outcome	other_allele.outcome	beta.exposure	beta.outcome	eaf.exposure	eaf.outcome	remove	palindromic	ambiguous	id.outcome	pos.outcome	pval.outcome	se.outcome	outcome	mr_keep.outcome	pval_origin.outcome	data_source.outcome	samplesize.outcome	se.exposure	pval.exposure	samplesize.exposure	exposure	mr_keep.exposure	pval_origin.exposure	id.exposure	data_source.exposure	action	SNP_index	mr_keep	R2	f	meanf	units.outcome	units.exposure	rsq.exposure	effective_n.exposure	rsq.outcome	effective_n.outcome	steiger_dir	steiger_pval
rs10826337	A	G	A	G	0.108404	-0.00713041	0.4045	0.593966	FALSE	FALSE	FALSE	w7yCHw	59649711	0.903242	0.058654	outcome	TRUE	reported	textfile	345727	0.0152444	1.15148e-12	8202	exposure	TRUE	reported	uNgc7b	textfile	2	1	TRUE	0.00612746540202321	50.5549902502484	82.1801409197456	NA	NA	0.00612895074603989	8202	4.27467333026727e-08	345727	TRUE	2.52180583515952e-12
rs112921933	T	C	T	C	-0.439852	0.139013	0.00937346	0.000828184	FALSE	FALSE	FALSE	w7yCHw	110484516	0.899483	1.10053	outcome	TRUE	reported	textfile	345727	0.0774785	1.37013e-08	8202	exposure	TRUE	reported	uNgc7b	textfile	2	1	TRUE	0.00391406269387886	32.2214307900052	82.1801409197456	NA	NA	0.00391501360585085	8202	4.61504834480823e-08	345727	TRUE	2.30090152493119e-08
rs116863065	A	T	A	T	-0.342683	-0.155537	0.0166401	0.0100147	FALSE	TRUE	FALSE	w7yCHw	110451141	0.6017	0.297989	outcome	TRUE	reported	textfile	345727	0.0582296	3.97958e-09	8202	exposure	TRUE	reported	uNgc7b	textfile	2	1	TRUE	0.00420482339879718	34.6251444878662	82.1801409197456	NA	NA	0.00420584465210567	8202	7.88017465006724e-07	345727	TRUE	9.8914113084666e-09
rs1171614	C	T	C	T	0.159195	0.0729316	0.770986	0.841179	FALSE	FALSE	FALSE	w7yCHw	59709780	0.353889	0.0786687	outcome	TRUE	reported	textfile	345727	0.0179704	8.09034e-19	8202	exposure	TRUE	reported	uNgc7b	textfile	2	1	TRUE	0.00947737344881605	78.4580384103682	82.1801409197456	NA	NA	0.00947966309055788	8202	2.48596878302355e-06	345727	TRUE	7.97304223726619e-18
rs117220229	A	T	A	T	-0.230246	0.126224	0.0368222	0.0769866	FALSE	TRUE	FALSE	w7yCHw	61836852	0.246086	0.108822	outcome	TRUE	reported	textfile	345727	0.0391968	4.25168e-09	8202	exposure	TRUE	reported	uNgc7b	textfile	2	1	TRUE	0.00418928582147215	34.4966601051383	82.1801409197456	NA	NA	0.0041903033169461	8202	3.89150860674946e-06	345727	TRUE	1.85827705343097e-08
rs12200204	C	T	C	T	-0.105658	-0.0114279	0.315598	0.215846	FALSE	FALSE	FALSE	w7yCHw	111061703	0.871483	0.0706402	outcome	TRUE	reported	textfile	345727	0.0161672	6.34808e-11	8202	exposure	TRUE	reported	uNgc7b	textfile	2	1	TRUE	0.00518035755470693	42.7001339098839	82.1801409197456	NA	NA	0.00518161450957007	8202	7.57004052351172e-08	345727	TRUE	1.28803391970348e-10
rs12210538	G	A	G	A	-0.466221	0.00131238	0.237234	0.161588	FALSE	FALSE	FALSE	w7yCHw	110438805	0.986593	0.0781009	outcome	TRUE	reported	textfile	345727	0.0165826	6.4145e-174	8202	exposure	TRUE	reported	uNgc7b	textfile	2	1	TRUE	0.0879022575622429	790.264550029385	82.1801409197456	NA	NA	0.0879218121309714	8202	8.16725929775671e-10	345727	TRUE	9.37475044330967e-165
rs139957766	A	G	A	G	-0.289242	0.112551	0.0254342	0.0713427	FALSE	FALSE	FALSE	w7yCHw	61839575	0.321178	0.113454	outcome	TRUE	reported	textfile	345727	0.0469444	7.21154e-10	8202	exposure	TRUE	reported	uNgc7b	textfile	2	1	TRUE	0.00460712387550077	37.9532712010099	82.1801409197456	NA	NA	0.00460824238602077	8202	2.84660409632069e-06	345727	TRUE	2.9647884059759e-09
rs140089546	C	T	C	T	-0.348692	0.155676	0.025403	0.0131252	FALSE	FALSE	FALSE	w7yCHw	110499257	0.547996	0.259129	outcome	TRUE	reported	textfile	345727	0.0467289	8.52083e-14	8202	exposure	TRUE	reported	uNgc7b	textfile	2	1	TRUE	0.00674302407601199	55.6681692286747	82.1801409197456	NA	NA	0.00674465762349669	8202	1.04395084814311e-06	345727	TRUE	3.46749992302445e-13
rs156025	T	C	T	C	0.112975	0.186341	0.205523	0.206956	FALSE	FALSE	FALSE	w7yCHw	132205191	0.0100383	0.0723792	outcome	TRUE	reported	textfile	345727	0.0182875	6.50309e-10	8202	exposure	TRUE	reported	uNgc7b	textfile	2	1	TRUE	0.00463148387680658	38.1548815083413	82.1801409197456	NA	NA	0.00463260827388616	8202	1.91712387218523e-05	345727	TRUE	1.1377964013946e-08
rs17579009	T	C	T	C	0.176803	-0.013487	0.0816238	0.0734593	FALSE	FALSE	FALSE	w7yCHw	110469781	0.903971	0.111789	outcome	TRUE	reported	textfile	345727	0.0270214	6.02644e-11	8202	exposure	TRUE	reported	uNgc7b	textfile	2	1	TRUE	0.00519257549918459	42.8013684303567	82.1801409197456	NA	NA	0.0051938354031155	8202	4.21019071351453e-08	345727	TRUE	1.17544858288022e-10
rs17831757	C	T	C	T	-0.150267	0.0352337	0.107744	0.142873	FALSE	FALSE	FALSE	w7yCHw	61867728	0.6698	0.082626	outcome	TRUE	reported	textfile	345727	0.0237241	2.38999e-10	8202	exposure	TRUE	reported	uNgc7b	textfile	2	1	TRUE	0.00486753262429654	40.1089993822526	82.1801409197456	NA	NA	0.00486871404722333	8202	5.25959172360915e-07	345727	TRUE	6.02541182484608e-10
rs191356113	T	C	T	C	-0.290937	0.141567	0.0273629	0.00454705	FALSE	FALSE	FALSE	w7yCHw	110869291	0.753675	0.451142	outcome	TRUE	reported	textfile	345727	0.0458146	2.14863e-10	8202	exposure	TRUE	reported	uNgc7b	textfile	2	1	TRUE	0.00489260666082204	40.3166280215408	82.1801409197456	NA	NA	0.00489379413966375	8202	2.84817472195079e-07	345727	TRUE	4.87586322166726e-10
rs198465	A	G	A	G	0.104273	0.0245985	0.492151	0.502046	FALSE	FALSE	FALSE	w7yCHw	61753846	0.673198	0.0583231	outcome	TRUE	reported	textfile	345727	0.0147689	1.66124e-12	8202	exposure	TRUE	reported	uNgc7b	textfile	2	1	TRUE	0.00604082451447603	49.8358	82.1801409197456	NA	NA	0.00604228898377043	8202	5.14523294600133e-07	345727	TRUE	4.97174988752634e-12
rs2024635	A	G	A	G	-0.0923412	-0.137235	0.618403	0.588688	FALSE	FALSE	FALSE	w7yCHw	34834811	0.0195443	0.0587732	outcome	TRUE	reported	textfile	345727	0.0153559	1.81671e-09	8202	exposure	TRUE	reported	uNgc7b	textfile	2	1	TRUE	0.00438945096796299	36.1521861859444	82.1801409197456	NA	NA	0.00439051686528237	8202	1.57700643209836e-05	345727	TRUE	2.36099040198109e-08
rs221712	C	G	C	G	0.108217	0.0431634	0.253836	0.208727	FALSE	TRUE	FALSE	w7yCHw	110441623	0.545076	0.0713262	outcome	TRUE	reported	textfile	345727	0.0169523	1.72997e-10	8202	exposure	TRUE	reported	uNgc7b	textfile	2	1	TRUE	0.00494380763058106	40.7406364400718	82.1801409197456	NA	NA	0.00494500747459688	8202	1.05925829714381e-06	345727	TRUE	5.24687121325217e-10
rs2229738	T	C	T	C	0.237725	0.0320678	0.0700598	0.156005	FALSE	FALSE	FALSE	w7yCHw	68794860	0.693542	0.0813794	outcome	TRUE	reported	textfile	345727	0.0287409	1.3248e-16	8202	exposure	TRUE	reported	uNgc7b	textfile	2	1	TRUE	0.00827221287291204	68.3979479433363	82.1801409197456	NA	NA	0.00827421379164742	8202	4.49136536111037e-07	345727	TRUE	5.35558264440691e-16
rs2428192	A	C	A	C	0.13383	-0.0239009	0.148943	0.176893	FALSE	FALSE	FALSE	w7yCHw	110466168	0.753696	0.076173	outcome	TRUE	reported	textfile	345727	0.0213854	3.89994e-10	8202	exposure	TRUE	reported	uNgc7b	textfile	2	1	TRUE	0.00475207967968619	39.1531120817469	82.1801409197456	NA	NA	0.0047532332143049	8202	2.84770816382186e-07	345727	TRUE	8.67540246506913e-10
rs2494528	C	T	C	T	0.123886	-0.00292871	0.352559	0.2682	FALSE	FALSE	FALSE	w7yCHw	110490010	0.964348	0.0655224	outcome	TRUE	reported	textfile	345727	0.0154837	1.23327e-15	8202	exposure	TRUE	reported	uNgc7b	textfile	2	1	TRUE	0.00774459432862943	64.001337893234	82.1801409197456	NA	NA	0.00774646862157374	8202	5.7788624716277e-09	345727	TRUE	3.01457297693943e-15
rs2691192	T	A	T	A	0.127501	-0.043183	0.545015	0.611753	FALSE	TRUE	TRUE	w7yCHw	110679873	0.468355	0.0595498	outcome	TRUE	reported	textfile	345727	0.0148408	8.60315e-18	8202	exposure	TRUE	reported	uNgc7b	textfile	2	1	FALSE	0.00891871054886381	73.791551993868	82.1801409197456	NA	NA	0.00892086643860118	8202	1.52101522126566e-06	345727	TRUE	5.88151368899369e-17
rs35473591	CT	C	CT	C	-0.269817	-0.0544006	0.334357	0.413398	FALSE	FALSE	FALSE	w7yCHw	61818856	0.353697	0.0586565	outcome	TRUE	reported	textfile	345727	0.0155038	7.79258e-68	8202	exposure	TRUE	reported	uNgc7b	textfile	2	1	TRUE	0.0356118396186626	302.800362830631	82.1801409197456	NA	NA	0.0356202160426133	8202	2.48795902153899e-06	345727	TRUE	1.79332522078763e-64
rs35611625	GT	G	GT	G	0.30052	0.254949	0.0667603	0.0763167	FALSE	FALSE	FALSE	w7yCHw	45519419	0.0193259	0.108991	outcome	TRUE	reported	textfile	345727	0.0293965	1.5645e-24	8202	exposure	TRUE	reported	uNgc7b	textfile	2	1	TRUE	0.0125816310710602	104.483953336418	82.1801409197456	NA	NA	0.0125846611431351	8202	1.5826602412371e-05	345727	TRUE	2.33843506141122e-22
rs41288588	A	C	A	C	-0.375716	0.101463	0.0201952	0.0235246	FALSE	FALSE	FALSE	w7yCHw	110391857	0.603295	0.195246	outcome	TRUE	reported	textfile	345727	0.0525375	8.59045e-13	8202	exposure	TRUE	reported	uNgc7b	textfile	2	1	TRUE	0.00619671095277203	51.1298668184583	82.1801409197456	NA	NA	0.00619821297775216	8202	7.81124002769506e-07	345727	TRUE	2.92638976532649e-12
rs41288592	T	C	T	C	-0.352985	0.331895	0.0229436	0.013492	FALSE	FALSE	FALSE	w7yCHw	110425059	0.201739	0.259981	outcome	TRUE	reported	textfile	345727	0.0490841	6.41147e-13	8202	exposure	TRUE	reported	uNgc7b	textfile	2	1	TRUE	0.00626586853054594	51.704092999704	82.1801409197456	NA	NA	0.00626738721296209	8202	4.713954293162e-06	345727	TRUE	5.0041760525404e-12
rs4464837	A	G	A	G	0.107204	-0.0626475	0.590072	0.554854	FALSE	FALSE	FALSE	w7yCHw	110565966	0.282752	0.0583224	outcome	TRUE	reported	textfile	345727	0.0156468	7.30719e-12	8202	exposure	TRUE	reported	uNgc7b	textfile	2	1	TRUE	0.00569079071575523	46.9315615640173	82.1801409197456	NA	NA	0.00569217081277058	8202	3.33737094446247e-06	345727	TRUE	4.07505037987629e-11
rs4500751	T	C	T	C	-0.0924316	0.0380422	0.310309	0.308217	FALSE	FALSE	FALSE	w7yCHw	15046354	0.541917	0.0623728	outcome	TRUE	reported	textfile	345727	0.0159299	6.53755e-09	8202	exposure	TRUE	reported	uNgc7b	textfile	2	1	TRUE	0.0040880483329303	33.6595983951348	82.1801409197456	NA	NA	0.00408904134076793	8202	1.07599317152e-06	345727	TRUE	1.72340937734989e-08
rs4504381	G	T	G	T	0.101727	0.0737485	0.324698	0.32702	FALSE	FALSE	FALSE	w7yCHw	132450078	0.232809	0.0618096	outcome	TRUE	reported	textfile	345727	0.015737	1.01819e-10	8202	exposure	TRUE	reported	uNgc7b	textfile	2	1	TRUE	0.0050687618426898	41.7755976654586	82.1801409197456	NA	NA	0.00506999185811941	8202	4.11776865271979e-06	345727	TRUE	5.59370020316149e-10
rs4948673	T	A	T	A	0.0989632	0.086964	0.730859	0.771057	FALSE	TRUE	FALSE	w7yCHw	45447987	0.207011	0.0689191	outcome	TRUE	reported	textfile	345727	0.0166775	2.9576e-09	8202	exposure	TRUE	reported	uNgc7b	textfile	2	1	TRUE	0.00427469703074355	35.2029978022758	82.1801409197456	NA	NA	0.00427573518185532	8202	4.60539658326229e-06	345727	TRUE	1.44307211139736e-08
rs55762062	A	C	A	C	-0.17072	-0.0332457	0.118269	0.144632	FALSE	FALSE	FALSE	w7yCHw	110413035	0.689222	0.0831326	outcome	TRUE	reported	textfile	345727	0.0234178	3.0953e-13	8202	exposure	TRUE	reported	uNgc7b	textfile	2	1	TRUE	0.00643801258879439	53.1337791672832	82.1801409197456	NA	NA	0.00643957272404769	8202	4.62591075768809e-07	345727	TRUE	9.59629618424955e-13
rs56303410	A	G	A	G	-0.104253	-0.0508629	0.319158	0.271744	FALSE	FALSE	FALSE	w7yCHw	59715837	0.436023	0.0652986	outcome	TRUE	reported	textfile	345727	0.015917	5.76217e-11	8202	exposure	TRUE	reported	uNgc7b	textfile	2	1	TRUE	0.00520318551672534	42.8892821287428	82.1801409197456	NA	NA	0.00520444798155665	8202	1.75494273170094e-06	345727	TRUE	2.16863889410927e-10
rs635619	A	G	A	G	0.246663	0.14623	0.294075	0.414666	FALSE	FALSE	FALSE	w7yCHw	132384573	0.0131163	0.0589494	outcome	TRUE	reported	textfile	345727	0.0160037	1.34096e-53	8202	exposure	TRUE	reported	uNgc7b	textfile	2	1	TRUE	0.0281480025587057	237.498736010294	82.1801409197456	NA	NA	0.028154674633024	8202	1.77981829550169e-05	345727	TRUE	1.90802737762992e-49
rs67981690	G	A	G	A	0.131509	-0.0613191	0.131753	0.19031	FALSE	FALSE	FALSE	w7yCHw	21190952	0.412951	0.074897	outcome	TRUE	reported	textfile	345727	0.0218966	1.90279e-09	8202	exposure	TRUE	reported	uNgc7b	textfile	2	1	TRUE	0.00437856753859939	36.0621543951214	82.1801409197456	NA	NA	0.0043796308047041	8202	1.93879134289059e-06	345727	TRUE	6.37468777994884e-09
rs72795177	A	G	A	G	-0.130647	-0.252357	0.113317	0.0621387	FALSE	FALSE	FALSE	w7yCHw	132413076	0.0356574	0.120124	outcome	TRUE	reported	textfile	345727	0.0235757	2.99709e-08	8202	exposure	TRUE	reported	uNgc7b	textfile	2	1	TRUE	0.00373015527493727	30.7017957197397	82.1801409197456	NA	NA	0.00373106167440936	8202	1.27654112893395e-05	345727	TRUE	2.55621412920392e-07
rs763563	G	T	G	T	0.150415	0.0058861	0.285427	0.321309	FALSE	FALSE	FALSE	w7yCHw	110401043	0.924384	0.0620161	outcome	TRUE	reported	textfile	345727	0.0164894	7.37851e-20	8202	exposure	TRUE	reported	uNgc7b	textfile	2	1	TRUE	0.0100431303244378	83.1891481165033	82.1801409197456	NA	NA	0.01004555526139	8202	2.60564696204294e-08	345727	TRUE	2.57633549796478e-19
rs7750080	G	C	G	C	-0.107895	-0.102342	0.809135	0.789766	FALSE	TRUE	FALSE	w7yCHw	110345181	0.152858	0.0715928	outcome	TRUE	reported	textfile	345727	0.0193691	2.54089e-08	8202	exposure	TRUE	reported	uNgc7b	textfile	2	1	TRUE	0.00376898188943111	31.0225750167367	82.1801409197456	NA	NA	0.00376989768777582	8202	5.91065691415672e-06	345727	TRUE	1.26260579262115e-07
rs9320330	G	C	G	C	0.156858	0.019413	0.41681	0.471971	FALSE	TRUE	TRUE	w7yCHw	110418549	0.738412	0.0581305	outcome	TRUE	reported	textfile	345727	0.0149602	1.01169e-25	8202	exposure	TRUE	reported	uNgc7b	textfile	2	1	FALSE	0.0132262392725601	109.908842686535	82.1801409197456	NA	NA	0.0132294225076247	8202	3.22586558069864e-07	345727	TRUE	7.9499609261185e-25
rs9386911	G	A	G	A	-0.113273	0.00531866	0.526264	0.38313	FALSE	FALSE	FALSE	w7yCHw	110525966	0.929003	0.0596933	outcome	TRUE	reported	textfile	345727	0.0148494	2.38234e-14	8202	exposure	TRUE	reported	uNgc7b	textfile	2	1	TRUE	0.0070444169055643	58.1740206803727	82.1801409197456	NA	NA	0.00704612294972965	8202	2.29626753049937e-08	345727	TRUE	5.63324612142822e-14
3-bromo-5-chloro-2,6-dihydroxybenzoic acid levels
SNP	effect_allele.exposure	other_allele.exposure	effect_allele.outcome	other_allele.outcome	beta.exposure	beta.outcome	eaf.exposure	eaf.outcome	remove	palindromic	ambiguous	id.outcome	pos.outcome	pval.outcome	se.outcome	outcome	mr_keep.outcome	pval_origin.outcome	data_source.outcome	samplesize.outcome	se.exposure	pval.exposure	samplesize.exposure	exposure	mr_keep.exposure	pval_origin.exposure	id.exposure	data_source.exposure	action	SNP_index	mr_keep	R2	f	meanf	units.outcome	units.exposure	rsq.exposure	effective_n.exposure	rsq.outcome	effective_n.outcome	steiger_dir	steiger_pval
rs2231142	T	G	T	G	0.35612	0.0560377	0.111836	0.0757351	FALSE	FALSE	FALSE	4TdGao	88131171	0.604312	0.108137	outcome	TRUE	reported	textfile	345727	0.0236977	4.83815e-51	8127	exposure	TRUE	reported	5O3uf5	textfile	2	1	TRUE	0.027036267047892	225.773749138228	99.2852665455598	NA	NA	0.0270427421573687	8127	7.76749258291587e-07	345727	TRUE	5.83741941199288e-49
rs2725263	C	A	C	A	0.10163	0.0685469	0.564932	0.416395	FALSE	FALSE	FALSE	4TdGao	88105276	0.248203	0.0593621	outcome	TRUE	reported	textfile	345727	0.0155771	6.82874e-11	8127	exposure	TRUE	reported	5O3uf5	textfile	2	1	TRUE	0.0052104065242538	42.5562885731919	99.2852665455598	NA	NA	0.00521168240155602	8127	3.85677821143092e-06	345727	TRUE	3.65692394520777e-10
rs2725271	T	C	T	C	0.150319	0.126908	0.451846	0.40216	FALSE	FALSE	FALSE	4TdGao	88170035	0.0317081	0.05908	outcome	TRUE	reported	textfile	345727	0.0151764	3.96633e-23	8127	exposure	TRUE	reported	5O3uf5	textfile	2	1	TRUE	0.0119274824670513	98.0806502813797	99.2852665455598	NA	NA	0.0119303834351812	8127	1.33462865476345e-05	345727	TRUE	3.56262602674652e-21
rs6822242	G	C	G	C	-0.263964	-0.272606	0.0262469	0.0470014	FALSE	TRUE	FALSE	4TdGao	88264635	0.0526114	0.140656	outcome	TRUE	reported	textfile	345727	0.047611	2.95333e-08	8127	exposure	TRUE	reported	5O3uf5	textfile	2	1	TRUE	0.00376794925340115	30.7304	99.2852665455598	NA	NA	0.00376887325299014	8127	1.08647263304307e-05	345727	TRUE	2.18678670850562e-07
Urate levels
SNP	effect_allele.exposure	other_allele.exposure	effect_allele.outcome	other_allele.outcome	beta.exposure	beta.outcome	eaf.exposure	eaf.outcome	remove	palindromic	ambiguous	id.outcome	pos.outcome	pval.outcome	se.outcome	outcome	mr_keep.outcome	pval_origin.outcome	data_source.outcome	samplesize.outcome	se.exposure	pval.exposure	samplesize.exposure	exposure	mr_keep.exposure	pval_origin.exposure	id.exposure	data_source.exposure	action	SNP_index	mr_keep	R2	f	meanf	units.outcome	units.exposure	rsq.exposure	effective_n.exposure	rsq.outcome	effective_n.outcome	steiger_dir	steiger_pval
rs114470224	C	T	C	T	-0.269343	0.0145877	0.0310859	0.0155343	FALSE	FALSE	FALSE	4I51Er	9974972	0.952307	0.243902	outcome	TRUE	reported	textfile	345727	0.0405615	3.12922e-11	8264	exposure	TRUE	reported	zdqFGt	textfile	2	1	TRUE	0.00530740158190951	44.0837218850053	63.5281091914017	NA	NA	0.00530867953550132	8264	1.03469448390235e-08	345727	TRUE	5.86795940470015e-11
rs12363578	T	C	T	C	-0.0843752	0.0942653	0.410342	0.283425	FALSE	FALSE	FALSE	4I51Er	64597394	0.140808	0.0640046	outcome	TRUE	reported	textfile	345727	0.01452	6.21204e-09	8264	exposure	TRUE	reported	zdqFGt	textfile	2	1	TRUE	0.00406944465253063	33.7591326410081	63.5281091914017	NA	NA	0.00407042574192309	8264	6.27404778913704e-06	345727	TRUE	3.5173476274253e-08
rs144853353	T	G	T	G	-0.293176	0.266661	0.0175907	0.00722506	FALSE	FALSE	FALSE	4I51Er	114021156	0.420032	0.330694	outcome	TRUE	reported	textfile	345727	0.0533369	3.86991e-08	8264	exposure	TRUE	reported	zdqFGt	textfile	2	1	TRUE	0.00364272241673407	30.2062054286964	63.5281091914017	NA	NA	0.00364360100540259	8264	1.88076603905139e-06	345727	TRUE	1.12458976980779e-07
rs1558487	T	C	T	C	-0.227897	-0.0325921	0.0303857	0.0334116	FALSE	FALSE	FALSE	4I51Er	10313488	0.843305	0.164883	outcome	TRUE	reported	textfile	345727	0.0407084	2.16484e-08	8264	exposure	TRUE	reported	zdqFGt	textfile	2	1	TRUE	0.00377811280323666	31.333148148527	63.5281091914017	NA	NA	0.00377902392287466	8264	1.13016562198029e-07	345727	TRUE	3.82934155323222e-08
rs2231142	T	G	T	G	0.139562	0.0560377	0.110586	0.0757351	FALSE	FALSE	FALSE	4I51Er	88131171	0.604312	0.108137	outcome	TRUE	reported	textfile	345727	0.0223072	3.93992e-10	8264	exposure	TRUE	reported	zdqFGt	textfile	2	1	TRUE	0.00471413239936689	39.1326383217546	63.5281091914017	NA	NA	0.00471526817859732	8264	7.76749258291587e-07	345727	TRUE	1.07053665835595e-09
rs2725271	T	C	T	C	0.0829125	0.126908	0.450522	0.40216	FALSE	FALSE	FALSE	4I51Er	88170035	0.0317081	0.05908	outcome	TRUE	reported	textfile	345727	0.0141261	4.37263e-09	8264	exposure	TRUE	reported	zdqFGt	textfile	2	1	TRUE	0.00415143708337755	34.4421576332957	63.5281091914017	NA	NA	0.00415243785764501	8264	1.33462865476345e-05	345727	TRUE	4.5504242719519e-08
rs34563732	T	C	T	C	-0.12397	-0.111319	0.482473	0.0756473	FALSE	FALSE	FALSE	4I51Er	10124150	0.303103	0.108098	outcome	TRUE	reported	textfile	345727	0.0140938	1.41684e-18	8264	exposure	TRUE	reported	zdqFGt	textfile	2	1	TRUE	0.00927554778928687	77.3520585507755	63.5281091914017	NA	NA	0.00927777230910504	8264	3.06740525699218e-06	345727	TRUE	1.57540419888057e-17
rs4697925	C	G	C	G	-0.122577	-0.0852038	0.404505	0.361035	FALSE	TRUE	FALSE	4I51Er	10122706	0.160161	0.0606636	outcome	TRUE	reported	textfile	345727	0.0143045	1.04293e-17	8264	exposure	TRUE	reported	zdqFGt	textfile	2	1	TRUE	0.00880725192861626	73.4120740651213	63.5281091914017	NA	NA	0.00880936513743508	8264	5.70595452945318e-06	345727	TRUE	1.70815212160848e-16
rs56123633	C	T	C	T	-0.125496	0.0943521	0.291974	0.233545	FALSE	FALSE	FALSE	4I51Er	9906561	0.168032	0.0684426	outcome	TRUE	reported	textfile	345727	0.0155398	6.70709e-16	8264	exposure	TRUE	reported	zdqFGt	textfile	2	1	TRUE	0.00783005254906482	65.2024326342264	63.5281091914017	NA	NA	0.00783193314168187	8264	5.49688904154354e-06	345727	TRUE	8.52982819215484e-15
rs62288489	A	T	A	T	0.0915956	0.103068	0.266709	0.198819	FALSE	TRUE	FALSE	4I51Er	10415518	0.157168	0.0728572	outcome	TRUE	reported	textfile	345727	0.0163039	1.93139e-08	8264	exposure	TRUE	reported	zdqFGt	textfile	2	1	TRUE	0.00380469982000574	31.5544852572661	63.5281091914017	NA	NA	0.00380561732680517	8264	5.78854541441537e-06	345727	TRUE	9.70822945252499e-08
rs75181558	G	A	G	A	-0.297643	-0.314616	0.0229502	0.0328515	FALSE	FALSE	FALSE	4I51Er	9914509	0.0681052	0.172457	outcome	TRUE	reported	textfile	345727	0.0466203	1.72059e-10	8264	exposure	TRUE	reported	zdqFGt	textfile	2	1	TRUE	0.00490810785698501	40.7507964184901	63.5281091914017	NA	NA	0.00490929014033807	8264	9.62642408602184e-06	345727	TRUE	1.68877475543161e-09
rs75341455	T	C	T	C	-0.318146	0.0545242	0.0270205	0.0355062	FALSE	FALSE	FALSE	4I51Er	10059523	0.732332	0.159415	outcome	TRUE	reported	textfile	345727	0.0431252	1.61574e-13	8264	exposure	TRUE	reported	zdqFGt	textfile	2	1	TRUE	0.00654258894621831	54.4108577501259	63.5281091914017	NA	NA	0.00654416236020569	8264	3.38368016115138e-07	345727	TRUE	4.82983443179773e-13
rs77026520	G	A	G	A	0.325186	0.503414	0.0150079	0.0244137	FALSE	FALSE	FALSE	4I51Er	206609029	0.00141876	0.15777	outcome	TRUE	reported	textfile	345727	0.0577686	1.81142e-08	8264	exposure	TRUE	reported	zdqFGt	textfile	2	1	TRUE	0.00381968580960095	31.6792489365447	63.5281091914017	NA	NA	0.00382060691642534	8264	2.94481592205864e-05	345727	TRUE	3.94247126997825e-07
rs9994216	T	G	T	G	0.27233	0.0939391	0.742994	0.769614	FALSE	FALSE	FALSE	4I51Er	9982917	0.177495	0.0696615	outcome	TRUE	reported	textfile	345727	0.015667	1.12209e-67	8264	exposure	TRUE	reported	zdqFGt	textfile	2	1	TRUE	0.0352722957400877	302.074571008787	63.5281091914017	NA	NA	0.0352805329393974	8264	5.25985869312533e-06	345727	TRUE	7.69601199493289e-64
3-aminoisobutyrate levels
SNP	effect_allele.exposure	other_allele.exposure	effect_allele.outcome	other_allele.outcome	beta.exposure	beta.outcome	eaf.exposure	eaf.outcome	remove	palindromic	ambiguous	id.outcome	pos.outcome	pval.outcome	se.outcome	outcome	mr_keep.outcome	pval_origin.outcome	data_source.outcome	samplesize.outcome	se.exposure	pval.exposure	samplesize.exposure	exposure	mr_keep.exposure	pval_origin.exposure	id.exposure	data_source.exposure	action	SNP_index	mr_keep	R2	f	meanf	units.outcome	units.exposure	rsq.exposure	effective_n.exposure	rsq.outcome	effective_n.outcome	steiger_dir	steiger_pval
rs10447139	T	C	T	C	0.453682	0.85324	0.00897078	0.00763579	FALSE	FALSE	FALSE	IeiN9T	35101028	0.0103217	0.332665	outcome	TRUE	reported	textfile	345727	0.0788265	8.64094e-09	8265	exposure	TRUE	reported	6b3HoP	textfile	2	1	TRUE	0.00399189056297521	33.1171919277929	157.857831780525	NA	NA	0.00399285291358179	8265	1.90278247811124e-05	345727	TRUE	1.21046893890995e-07
rs10774020	C	T	C	T	0.226744	-0.0634989	0.660909	0.698869	FALSE	FALSE	FALSE	IeiN9T	239710	0.317375	0.0635075	outcome	TRUE	reported	textfile	345727	0.0157008	2.83582e-47	8265	exposure	TRUE	reported	6b3HoP	textfile	2	1	TRUE	0.0246128672178962	208.508104101584	157.857831780525	NA	NA	0.0246186779236852	8265	2.89168065163584e-06	345727	TRUE	6.77894071069137e-45
rs114441735	A	T	A	T	0.216942	-0.0268335	0.051833	0.0450773	FALSE	TRUE	FALSE	IeiN9T	35135559	0.852664	0.144484	outcome	TRUE	reported	textfile	345727	0.0332443	6.76884e-11	8265	exposure	TRUE	reported	6b3HoP	textfile	2	1	TRUE	0.00512599430628541	42.5743267091414	157.857831780525	NA	NA	0.00512722865510821	8265	9.97664007823302e-08	345727	TRUE	1.41011170188842e-10
rs114900067	T	C	T	C	0.415949	0.331301	0.0228139	0.024044	FALSE	FALSE	FALSE	IeiN9T	35052741	0.0757059	0.186526	outcome	TRUE	reported	textfile	345727	0.0503978	1.54061e-16	8265	exposure	TRUE	reported	6b3HoP	textfile	2	1	TRUE	0.00817428018746991	68.1007518153801	157.857831780525	NA	NA	0.00817624253656591	8265	9.12498147131662e-06	345727	TRUE	3.45067398088706e-15
rs11613626	T	C	T	C	0.119984	-0.0676794	0.16305	0.162992	FALSE	FALSE	FALSE	IeiN9T	340506	0.395438	0.0796418	outcome	TRUE	reported	textfile	345727	0.0204086	4.12506e-09	8265	exposure	TRUE	reported	6b3HoP	textfile	2	1	TRUE	0.004164520289957	34.5553375603109	157.857831780525	NA	NA	0.00416552408346551	8265	2.08881113153662e-06	345727	TRUE	1.37997329993899e-08
rs11957653	C	T	C	T	-0.346	-0.0116386	0.737324	0.755251	FALSE	FALSE	FALSE	IeiN9T	34987436	0.86313	0.0675128	outcome	TRUE	reported	textfile	345727	0.0165196	2.09279e-97	8265	exposure	TRUE	reported	6b3HoP	textfile	2	1	TRUE	0.0504022541805908	438.579206961834	157.857831780525	NA	NA	0.0504138386615469	8265	8.59603988663844e-08	345727	TRUE	2.51364829440435e-93
rs139091528	T	C	T	C	-0.426156	0.0965017	0.0166748	0.0433488	FALSE	FALSE	FALSE	IeiN9T	35017937	0.495518	0.141589	outcome	TRUE	reported	textfile	345727	0.0579886	1.99753e-13	8265	exposure	TRUE	reported	6b3HoP	textfile	2	1	TRUE	0.0064920292064394	53.9941690552931	157.857831780525	NA	NA	0.00649359035193818	8265	1.34362949977748e-06	345727	TRUE	8.66256012929296e-13
rs142229948	G	C	G	C	0.95191	0.458717	0.00947292	0.00719979	FALSE	TRUE	FALSE	IeiN9T	34953143	0.193229	0.352565	outcome	TRUE	reported	textfile	345727	0.0752597	1.14271e-36	8265	exposure	TRUE	reported	6b3HoP	textfile	2	1	TRUE	0.0189888171669338	159.941699948056	157.857831780525	NA	NA	0.0189933259788357	8265	4.89641664535832e-06	345727	TRUE	1.47866778431425e-34
rs147534887	A	G	A	G	-0.237085	-0.0776026	0.046559	0.0349177	FALSE	FALSE	FALSE	IeiN9T	34888059	0.622001	0.157403	outcome	TRUE	reported	textfile	345727	0.0350337	1.31167e-11	8265	exposure	TRUE	reported	6b3HoP	textfile	2	1	TRUE	0.00551053128753672	45.7858242459489	157.857831780525	NA	NA	0.00551185772055696	8265	7.03064942103168e-07	345727	TRUE	3.94807698021858e-11
rs150065672	T	C	T	C	0.265585	0.421041	0.0285958	0.0220197	FALSE	FALSE	FALSE	IeiN9T	36071922	0.0350526	0.199758	outcome	TRUE	reported	textfile	345727	0.0443442	2.10922e-09	8265	exposure	TRUE	reported	6b3HoP	textfile	2	1	TRUE	0.00432125421005112	35.8614901529545	157.857831780525	NA	NA	0.00432229561788651	8265	1.2850027249666e-05	345727	TRUE	2.24179322613478e-08
rs182938656	A	G	A	G	0.39323	-0.133374	0.0346107	0.0265962	FALSE	FALSE	FALSE	IeiN9T	34955827	0.452924	0.177702	outcome	TRUE	reported	textfile	345727	0.0402384	1.47746e-22	8265	exposure	TRUE	reported	6b3HoP	textfile	2	1	TRUE	0.0114229830167178	95.4787609317192	157.857831780525	NA	NA	0.0114257162775803	8265	1.62939443263047e-06	345727	TRUE	1.6658597794711e-21
rs34248297	G	C	G	C	-0.317062	-0.0105488	0.0639684	0.0537931	FALSE	TRUE	FALSE	IeiN9T	35027066	0.935467	0.130283	outcome	TRUE	reported	textfile	345727	0.0301464	7.18156e-26	8265	exposure	TRUE	reported	6b3HoP	textfile	2	1	TRUE	0.0132068949481897	110.589111738029	157.857831780525	NA	NA	0.0132100493548735	8265	1.896268463483e-08	345727	TRUE	3.85341786590401e-25
rs368823	G	A	G	A	-0.145064	-0.00748907	0.148642	0.266267	FALSE	FALSE	FALSE	IeiN9T	34854386	0.909256	0.0657073	outcome	TRUE	reported	textfile	345727	0.0206325	2.05231e-12	8265	exposure	TRUE	reported	6b3HoP	textfile	2	1	TRUE	0.00594542574952419	49.4208811476579	157.857831780525	NA	NA	0.00594685623945698	8265	3.75748914487167e-08	345727	TRUE	4.40391209870462e-12
rs37369	T	C	T	C	0.938994	0.20606	0.082576	0.101154	FALSE	FALSE	FALSE	IeiN9T	35037010	0.0323013	0.09626	outcome	TRUE	reported	textfile	345727	0.0246649	1e-200	8265	exposure	TRUE	reported	6b3HoP	textfile	2	1	TRUE	0.149194948318803	1448.97806556538	157.857831780525	NA	NA	0.149225671114889	8265	1.32543713662465e-05	345727	TRUE	4.35092000647911e-288
rs37435	A	G	A	G	-0.488289	-0.0294964	0.982807	0.987663	FALSE	FALSE	FALSE	IeiN9T	34917007	0.912054	0.267061	outcome	TRUE	reported	textfile	345727	0.0570334	1.11451e-17	8265	exposure	TRUE	reported	6b3HoP	textfile	2	1	TRUE	0.00879058779961924	73.2808083682419	157.857831780525	NA	NA	0.0087926967902586	8265	3.52846883440069e-08	345727	TRUE	3.42398675919297e-17
rs62356973	C	T	C	T	0.198951	-0.052536	0.0751039	0.092856	FALSE	FALSE	FALSE	IeiN9T	34850509	0.595776	0.0990339	outcome	TRUE	reported	textfile	345727	0.0283131	2.11289e-12	8265	exposure	TRUE	reported	6b3HoP	textfile	2	1	TRUE	0.00593865009655667	49.3642225931168	157.857831780525	NA	NA	0.0059400789659857	8265	8.13982566650217e-07	345727	TRUE	7.08304157171446e-12
rs6781987	A	G	A	G	0.119043	0.00333949	0.178909	0.216822	FALSE	FALSE	FALSE	IeiN9T	66314960	0.962305	0.0706602	outcome	TRUE	reported	textfile	345727	0.0195706	1.18144e-09	8265	exposure	TRUE	reported	6b3HoP	textfile	2	1	TRUE	0.00445673412262749	36.9908524496082	157.857831780525	NA	NA	0.00445780803448939	8265	6.46070307379433e-09	345727	TRUE	1.98192997246199e-09
rs6888701	T	A	T	A	-0.283268	0.177912	0.0358614	0.0258475	FALSE	TRUE	FALSE	IeiN9T	35002407	0.344046	0.188028	outcome	TRUE	reported	textfile	345727	0.0399911	1.40774e-12	8265	exposure	TRUE	reported	6b3HoP	textfile	2	1	TRUE	0.0060338853458385	50.160658273558	157.857831780525	NA	NA	0.00603533699023265	8265	2.58960497363638e-06	345727	TRUE	7.48455875220966e-12
rs6892674	T	C	T	C	-0.364918	-0.0478396	0.598088	0.563634	FALSE	FALSE	FALSE	IeiN9T	35038319	0.413506	0.0585022	outcome	TRUE	reported	textfile	345727	0.014742	2.82897e-135	8265	exposure	TRUE	reported	6b3HoP	textfile	2	1	TRUE	0.0690200438823945	612.594	157.857831780525	NA	NA	0.0690355963945547	8265	1.9341896621336e-06	345727	TRUE	9.65035951522255e-128
rs7132236	A	G	A	G	-0.185828	0.0605002	0.0606905	0.0624008	FALSE	FALSE	FALSE	IeiN9T	230154	0.619819	0.12195	outcome	TRUE	reported	textfile	345727	0.0311179	2.3473e-09	8265	exposure	TRUE	reported	6b3HoP	textfile	2	1	TRUE	0.00429624491337916	35.6530459365031	157.857831780525	NA	NA	0.00429728032007035	8265	7.11899875355325e-07	345727	TRUE	5.84082314308124e-09
rs71615831	C	A	C	A	-0.0917907	-0.0571898	0.33039	0.359793	FALSE	FALSE	FALSE	IeiN9T	34806331	0.345137	0.0605784	outcome	TRUE	reported	textfile	345727	0.0156639	4.6284e-09	8265	exposure	TRUE	reported	6b3HoP	textfile	2	1	TRUE	0.00413765250672523	34.331474374074	157.857831780525	NA	NA	0.00413864985108244	8265	2.57792129232327e-06	345727	TRUE	1.67458469523358e-08
rs71615838	G	T	G	T	-0.320404	-0.0477131	0.121883	0.108338	FALSE	FALSE	FALSE	IeiN9T	35036098	0.603166	0.091782	outcome	TRUE	reported	textfile	345727	0.0222961	7.93486e-47	8265	exposure	TRUE	reported	6b3HoP	textfile	2	1	TRUE	0.0243768338710175	206.458584901609	157.857831780525	NA	NA	0.0243825902460675	8265	7.81680196971675e-07	345727	TRUE	6.41654543898311e-45
rs72732827	T	A	T	A	0.634739	-0.698493	0.00920507	0.00491026	FALSE	TRUE	FALSE	IeiN9T	34868392	0.0918311	0.414334	outcome	TRUE	reported	textfile	345727	0.077902	3.70258e-16	8265	exposure	TRUE	reported	6b3HoP	textfile	2	1	TRUE	0.00796848505812508	66.3724801516466	157.857831780525	NA	NA	0.00797039840026657	8265	8.22031794631631e-06	345727	TRUE	7.05506993518631e-15
rs73049834	G	A	G	A	-0.113521	0.0449839	0.175254	0.12454	FALSE	FALSE	FALSE	IeiN9T	471071	0.606794	0.0874059	outcome	TRUE	reported	textfile	345727	0.0196026	6.99138e-09	8265	exposure	TRUE	reported	6b3HoP	textfile	2	1	TRUE	0.00404132262393478	33.5289501463564	157.857831780525	NA	NA	0.00404229684307995	8265	7.6612845708611e-07	345727	TRUE	1.69752009473947e-08
rs7713977	T	C	T	C	-0.183716	-0.0943092	0.0779783	0.118037	FALSE	FALSE	FALSE	IeiN9T	35075137	0.294397	0.0899447	outcome	TRUE	reported	textfile	345727	0.028066	5.91546e-11	8265	exposure	TRUE	reported	6b3HoP	textfile	2	1	TRUE	0.00515756091549518	42.8378647416314	157.857831780525	NA	NA	0.00515880282619969	8265	3.17998301403986e-06	345727	TRUE	2.92204009761373e-10
rs7715600	C	T	C	T	-0.0946467	-0.0519294	0.640447	0.616688	FALSE	FALSE	FALSE	IeiN9T	35297004	0.383095	0.0595378	outcome	TRUE	reported	textfile	345727	0.0155065	1.03649e-09	8265	exposure	TRUE	reported	6b3HoP	textfile	2	1	TRUE	0.00448732290673868	37.2458834845236	157.857831780525	NA	NA	0.00448840415616092	8265	2.20043884358422e-06	345727	TRUE	3.77208331344054e-09
Cys-gly, oxidized levels
SNP	effect_allele.exposure	other_allele.exposure	effect_allele.outcome	other_allele.outcome	beta.exposure	beta.outcome	eaf.exposure	eaf.outcome	remove	palindromic	ambiguous	id.outcome	pos.outcome	pval.outcome	se.outcome	outcome	mr_keep.outcome	pval_origin.outcome	data_source.outcome	samplesize.outcome	se.exposure	pval.exposure	samplesize.exposure	exposure	mr_keep.exposure	pval_origin.exposure	id.exposure	data_source.exposure	action	SNP_index	mr_keep	R2	f	meanf	units.outcome	units.exposure	rsq.exposure	effective_n.exposure	rsq.outcome	effective_n.outcome	steiger_dir	steiger_pval
rs11861335	T	C	T	C	0.148282	0.0842074	0.0908867	0.103477	FALSE	FALSE	FALSE	NjrJIo	88956740	0.377837	0.0954852	outcome	TRUE	reported	textfile	345727	0.0268521	3.34797e-08	8256	exposure	TRUE	reported	VNKJWJ	textfile	2	1	TRUE	0.00368001438435716	30.4870314427296	112.699054281531	NA	NA	0.0036809027944878	8256	2.24955507340389e-06	345727	TRUE	1.04294749719917e-07
rs12595968	T	G	T	G	0.241415	-0.01596	0.0685631	0.170524	FALSE	FALSE	FALSE	NjrJIo	89694066	0.837042	0.0775966	outcome	TRUE	reported	textfile	345727	0.0296413	3.80692e-16	8256	exposure	TRUE	reported	VNKJWJ	textfile	2	1	TRUE	0.00797056089363962	66.317598069837	112.699054281531	NA	NA	0.00797247681701779	8256	1.22362840671608e-07	345727	TRUE	1.18107347206696e-15
rs12931681	G	A	G	A	0.103729	-0.00425642	0.370648	0.523746	FALSE	FALSE	FALSE	NjrJIo	89156536	0.942141	0.0586446	outcome	TRUE	reported	textfile	345727	0.0156911	3.82507e-11	8256	exposure	TRUE	reported	VNKJWJ	textfile	2	1	TRUE	0.00526539725952102	43.6906375432736	112.699054281531	NA	NA	0.00526666638144222	8256	1.52370924150057e-08	345727	TRUE	7.22348398838533e-11
rs13335091	T	C	T	C	0.119709	0.101004	0.146201	0.109459	FALSE	FALSE	FALSE	NjrJIo	89946847	0.29606	0.0966617	outcome	TRUE	reported	textfile	345727	0.0216069	3.01939e-08	8256	exposure	TRUE	reported	VNKJWJ	textfile	2	1	TRUE	0.00370413940978654	30.6876379776042	112.699054281531	NA	NA	0.0037050336223983	8256	3.1581745673456e-06	345727	TRUE	1.08384007487074e-07
rs13380736	T	C	T	C	0.147675	0.106333	0.147117	0.156085	FALSE	FALSE	FALSE	NjrJIo	90042013	0.184517	0.0801317	outcome	TRUE	reported	textfile	345727	0.0215749	7.65971e-12	8256	exposure	TRUE	reported	VNKJWJ	textfile	2	1	TRUE	0.00564272838642897	46.839382012067	112.699054281531	NA	NA	0.00564408794066478	8256	5.09324331331591e-06	345727	TRUE	5.56106076233231e-11
rs215092	A	T	A	T	0.137626	-0.0361069	0.880994	0.628029	FALSE	TRUE	FALSE	NjrJIo	15967598	0.549174	0.0602788	outcome	TRUE	reported	textfile	345727	0.0238654	8.0807e-09	8256	exposure	TRUE	reported	VNKJWJ	textfile	2	1	TRUE	0.00401188072901353	33.2474483345399	112.699054281531	NA	NA	0.00401284893392211	8256	1.03781507369992e-06	345727	TRUE	2.10056100607426e-08
rs258322	G	A	G	A	0.253321	0.158509	0.905481	0.838394	FALSE	FALSE	FALSE	NjrJIo	89689495	0.0458807	0.079394	outcome	TRUE	reported	textfile	345727	0.0259841	1.862e-22	8256	exposure	TRUE	reported	VNKJWJ	textfile	2	1	TRUE	0.0113811522020417	95.0214842503699	112.699054281531	NA	NA	0.0113838785384962	8256	1.15291341864082e-05	345727	TRUE	1.26716803437519e-20
rs258341	C	T	C	T	-0.408003	-0.0574624	0.59339	0.569101	FALSE	FALSE	FALSE	NjrJIo	89624734	0.3286	0.058819	outcome	TRUE	reported	textfile	345727	0.0151255	2.94255e-160	8256	exposure	TRUE	reported	VNKJWJ	textfile	2	1	TRUE	0.0809945223633039	727.448098901316	112.699054281531	NA	NA	0.0810125579700219	8256	2.76057953698775e-06	345727	TRUE	1.64043845640918e-150
rs3114913	A	G	A	G	-0.104942	-0.017659	0.718008	0.612981	FALSE	FALSE	FALSE	NjrJIo	89304999	0.76797	0.0598548	outcome	TRUE	reported	textfile	345727	0.0169653	6.18335e-10	8256	exposure	TRUE	reported	VNKJWJ	textfile	2	1	TRUE	0.0046131523743664	38.2534285929616	112.699054281531	NA	NA	0.00461426501455704	8256	2.51769635132975e-07	345727	TRUE	1.33591121862829e-09
rs3212363	T	A	T	A	0.23939	-0.0860104	0.238446	0.404557	FALSE	TRUE	FALSE	NjrJIo	89919033	0.145498	0.0590885	outcome	TRUE	reported	textfile	345727	0.0179083	9.35601e-41	8256	exposure	TRUE	reported	VNKJWJ	textfile	2	1	TRUE	0.0211852745862391	178.647962576268	112.699054281531	NA	NA	0.0211902991445818	8256	6.12861806966682e-06	345727	TRUE	2.65806513020935e-38
rs34120897	C	A	C	A	0.22207	0.156556	0.10696	0.146692	FALSE	FALSE	FALSE	NjrJIo	89729405	0.0590799	0.0829392	outcome	TRUE	reported	textfile	345727	0.0246278	1.9322e-19	8256	exposure	TRUE	reported	VNKJWJ	textfile	2	1	TRUE	0.009752203371787	81.2874180632502	112.699054281531	NA	NA	0.00975454334636448	8256	1.03058659220715e-05	345727	TRUE	7.43575274365336e-18
rs34141697	T	A	T	A	0.28349	0.135072	0.231704	0.204288	FALSE	TRUE	FALSE	NjrJIo	89719713	0.0614993	0.0722354	outcome	TRUE	reported	textfile	345727	0.0181262	3.89786e-55	8256	exposure	TRUE	reported	VNKJWJ	textfile	2	1	TRUE	0.0287747933734143	244.543843058922	112.699054281531	NA	NA	0.0287815650258947	8256	1.01133565664772e-05	345727	TRUE	1.75733285972144e-51
rs45440695	T	C	T	C	-0.197883	0.00273943	0.0674088	0.093756	FALSE	FALSE	FALSE	NjrJIo	16067142	0.978345	0.100923	outcome	TRUE	reported	textfile	345727	0.0306391	1.05729e-10	8256	exposure	TRUE	reported	VNKJWJ	textfile	2	1	TRUE	0.00502697339302432	41.7022746109204	112.699054281531	NA	NA	0.0050281853379817	8256	2.13112697045751e-09	345727	TRUE	1.85507426169162e-10
rs4636910	C	T	C	T	-0.207634	-0.0468874	0.758903	0.605444	FALSE	FALSE	FALSE	NjrJIo	90070726	0.4324	0.0597222	outcome	TRUE	reported	textfile	345727	0.0181165	2.06948e-30	8256	exposure	TRUE	reported	VNKJWJ	textfile	2	1	TRUE	0.0156611371237161	131.32370436074	112.699054281531	NA	NA	0.0156648724780674	8256	1.78282677224128e-06	345727	TRUE	5.32904258922918e-29
rs62029842	T	C	T	C	0.158328	-0.000344737	0.0968824	0.12548	FALSE	FALSE	FALSE	NjrJIo	16012319	0.996888	0.0883973	outcome	TRUE	reported	textfile	345727	0.0269245	4.09107e-09	8256	exposure	TRUE	reported	VNKJWJ	textfile	2	1	TRUE	0.0041709526857607	34.5712384682078	112.699054281531	NA	NA	0.00417195911940297	8256	4.39913216906677e-11	345727	TRUE	6.3796000259841e-09
rs62070319	T	C	T	C	-0.178958	-0.0847587	0.498235	0.504985	FALSE	FALSE	FALSE	NjrJIo	89506808	0.144928	0.0581462	outcome	TRUE	reported	textfile	345727	0.0149516	5.15579e-33	8256	exposure	TRUE	reported	VNKJWJ	textfile	2	1	TRUE	0.0170563397007912	143.225938145301	112.699054281531	NA	NA	0.017060402058845	8256	6.14599841703654e-06	345727	TRUE	5.74320414702861e-31
rs75687828	A	G	A	G	0.376396	0.274588	0.0836705	0.0689668	FALSE	FALSE	FALSE	NjrJIo	89552468	0.008085	0.103677	outcome	TRUE	reported	textfile	345727	0.0274736	1.01151e-42	8256	exposure	TRUE	reported	VNKJWJ	textfile	2	1	TRUE	0.0222293202661814	187.65219010966	112.699054281531	NA	NA	0.022234586818281	8256	2.02889077290906e-05	345727	TRUE	4.08579615851888e-39
rs76820443	T	G	T	G	0.262859	-0.126458	0.0620807	0.0620786	FALSE	FALSE	FALSE	NjrJIo	89638389	0.291961	0.119998	outcome	TRUE	reported	textfile	345727	0.0314916	7.00596e-17	8256	exposure	TRUE	reported	VNKJWJ	textfile	2	1	TRUE	0.00836829476543752	69.654796865922	112.699054281531	NA	NA	0.00837030548741034	8256	3.21227281243557e-06	345727	TRUE	6.68685886502015e-16
rs78545310	T	C	T	C	-0.230309	0.165605	0.083485	0.0692487	FALSE	FALSE	FALSE	NjrJIo	89638523	0.142926	0.113042	outcome	TRUE	reported	textfile	345727	0.0270838	1.83853e-17	8256	exposure	TRUE	reported	VNKJWJ	textfile	2	1	TRUE	0.00868251822847536	72.2931924188066	112.699054281531	NA	NA	0.00868460379038419	8256	6.20774320709823e-06	345727	TRUE	3.15023206282195e-16
rs78764795	T	A	T	A	-0.170691	0.000858126	0.0984291	0.131064	FALSE	TRUE	FALSE	NjrJIo	89688670	0.992084	0.0864923	outcome	TRUE	reported	textfile	345727	0.0257549	3.41431e-11	8256	exposure	TRUE	reported	VNKJWJ	textfile	2	1	TRUE	0.00529209212547733	43.9133217479156	112.699054281531	NA	NA	0.0052933676474391	8256	2.8471899624465e-10	345727	TRUE	6.06638700008968e-11
rs8051874	C	A	C	A	-0.0845332	-0.0714157	0.468037	0.521723	FALSE	FALSE	FALSE	NjrJIo	89202628	0.221476	0.0584123	outcome	TRUE	reported	textfile	345727	0.0154372	4.3519e-08	8256	exposure	TRUE	reported	VNKJWJ	textfile	2	1	TRUE	0.00361887319511401	29.9786683517945	112.699054281531	NA	NA	0.00361974689847967	8256	4.32360606827148e-06	345727	TRUE	1.77531529723256e-07
rs8053979	G	A	G	A	0.167028	-0.0892945	0.785118	0.862658	FALSE	FALSE	FALSE	NjrJIo	89804760	0.293762	0.0850501	outcome	TRUE	reported	textfile	345727	0.0190797	2.05515e-18	8256	exposure	TRUE	reported	VNKJWJ	textfile	2	1	TRUE	0.00919714520418523	76.6179024897835	112.699054281531	NA	NA	0.00919935323360532	8256	3.18836176536026e-06	345727	TRUE	2.30276286672957e-17
rs8064126	A	T	A	T	-0.179397	0.0538054	0.657966	0.558916	FALSE	TRUE	TRUE	NjrJIo	89606404	0.358432	0.0585888	outcome	TRUE	reported	textfile	345727	0.0159417	2.23143e-29	8256	exposure	TRUE	reported	VNKJWJ	textfile	2	1	FALSE	0.0151070762461235	126.606460791939	112.699054281531	NA	NA	0.0151106814794719	8256	2.43944301783763e-06	345727	TRUE	6.48420794795939e-28
rs924135	T	A	T	A	0.204434	-0.0490768	0.610643	0.546107	FALSE	TRUE	TRUE	NjrJIo	16029602	0.398321	0.058105	outcome	TRUE	reported	textfile	345727	0.0156099	3.45177e-39	8256	exposure	TRUE	reported	VNKJWJ	textfile	2	1	FALSE	0.020351967339662	171.47499185538	112.699054281531	NA	NA	0.0203567983710272	8256	2.06344920283938e-06	345727	TRUE	2.45215887556026e-37
rs9939442	C	A	C	A	0.33777	-0.488357	0.0374617	0.0300436	FALSE	FALSE	FALSE	NjrJIo	89986541	0.0906275	0.288611	outcome	TRUE	reported	textfile	345727	0.0398046	2.14448e-17	8256	exposure	TRUE	reported	VNKJWJ	textfile	2	1	TRUE	0.00864638421866969	71.9897059987539	112.699054281531	NA	NA	0.00864846117682342	8256	8.28160844546696e-06	345727	TRUE	4.8508925226659e-16
Beta-hydroxyisovalerate levels
SNP	effect_allele.exposure	other_allele.exposure	effect_allele.outcome	other_allele.outcome	beta.exposure	beta.outcome	eaf.exposure	eaf.outcome	remove	palindromic	ambiguous	id.outcome	pos.outcome	pval.outcome	se.outcome	outcome	mr_keep.outcome	pval_origin.outcome	data_source.outcome	samplesize.outcome	se.exposure	pval.exposure	samplesize.exposure	exposure	mr_keep.exposure	pval_origin.exposure	id.exposure	data_source.exposure	action	SNP_index	mr_keep	R2	f	meanf	units.outcome	units.exposure	rsq.exposure	effective_n.exposure	rsq.outcome	effective_n.outcome	steiger_dir	steiger_pval
rs10888445	T	A	T	A	0.111273	0.00815204	0.605932	0.654882	FALSE	TRUE	FALSE	CE8asL	151869294	0.893338	0.060799	outcome	TRUE	reported	textfile	345727	0.015421	5.36621e-13	8201	exposure	TRUE	reported	sGw200	textfile	2	1	TRUE	0.00630869018050244	52.0533391796847	57.6503	NA	NA	0.00631021936234451	8201	5.20006681239019e-08	345727	TRUE	1.21853738629011e-12
rs114200864	A	G	A	G	-0.293406	-0.0582344	0.0208768	0.0551525	FALSE	FALSE	FALSE	CE8asL	6274241	0.655733	0.130625	outcome	TRUE	reported	textfile	345727	0.0523853	2.13216e-08	8201	exposure	TRUE	reported	sGw200	textfile	2	1	TRUE	0.00381060744645446	31.3626813204606	57.6503	NA	NA	0.00381153343332817	8201	5.7487784062289e-07	345727	TRUE	4.65621589865731e-08
rs1154510	C	T	C	T	0.212962	0.153904	0.879424	0.787096	FALSE	FALSE	FALSE	CE8asL	121857429	0.0305914	0.0711744	outcome	TRUE	reported	textfile	345727	0.0227394	7.58251e-21	8201	exposure	TRUE	reported	sGw200	textfile	2	1	TRUE	0.0105817943344211	87.6880284303599	57.6503	NA	NA	0.0105843482539084	8201	1.35243227512363e-05	345727	TRUE	5.09663699160887e-19
rs6443851	G	A	G	A	-0.129202	-0.047962	0.674702	0.689188	FALSE	FALSE	FALSE	CE8asL	183101261	0.441732	0.0623472	outcome	TRUE	reported	textfile	345727	0.0160849	9.54928e-16	8201	exposure	TRUE	reported	sGw200	textfile	2	1	TRUE	0.00780605314447782	64.505362015571	57.6503	NA	NA	0.0078079424246171	8201	1.7117058402311e-06	345727	TRUE	5.67407742369533e-15
rs77863699	C	T	C	T	0.355656	0.110988	0.0238677	0.0172406	FALSE	FALSE	FALSE	CE8asL	20552206	0.612039	0.21884	outcome	TRUE	reported	textfile	345727	0.0490129	3.97592e-13	8201	exposure	TRUE	reported	sGw200	textfile	2	1	TRUE	0.00637959588885323	52.6421422872237	57.6503	NA	NA	0.00638114214736784	8201	7.43990740321742e-07	345727	TRUE	1.37483495496686e-12
Methylsuccinate levels
SNP	effect_allele.exposure	other_allele.exposure	effect_allele.outcome	other_allele.outcome	beta.exposure	beta.outcome	eaf.exposure	eaf.outcome	remove	palindromic	ambiguous	id.outcome	pos.outcome	pval.outcome	se.outcome	outcome	mr_keep.outcome	pval_origin.outcome	data_source.outcome	samplesize.outcome	se.exposure	pval.exposure	samplesize.exposure	exposure	mr_keep.exposure	pval_origin.exposure	id.exposure	data_source.exposure	action	SNP_index	mr_keep	R2	f	meanf	units.outcome	units.exposure	rsq.exposure	effective_n.exposure	rsq.outcome	effective_n.outcome	steiger_dir	steiger_pval
rs11611243	A	G	A	G	-0.167419	0.0733307	0.325661	0.313338	FALSE	FALSE	FALSE	ZCrfYE	120603736	0.244186	0.0629671	outcome	TRUE	reported	textfile	345727	0.0170054	7.20194e-23	7965	exposure	TRUE	reported	6xWbwJ	textfile	2	1	TRUE	0.012022562131005	96.9006564114349	99.5778504438453	NA	NA	0.0120255454248049	7965	3.92294110767874e-06	345727	TRUE	1.44739932099391e-21
rs2701192	A	G	A	G	0.114692	0.055568	0.833713	0.811367	FALSE	FALSE	FALSE	ZCrfYE	120931025	0.459273	0.0750873	outcome	TRUE	reported	textfile	345727	0.0206711	2.88272e-08	7965	exposure	TRUE	reported	6xWbwJ	textfile	2	1	TRUE	0.00385015282749	30.7772641358379	99.5778504438453	NA	NA	0.00385111611405082	7965	1.5841090762612e-06	345727	TRUE	7.84281397274566e-08
rs2859400	G	T	G	T	-0.122897	0.12957	0.833396	0.917493	FALSE	FALSE	FALSE	ZCrfYE	121065333	0.21444	0.10437	outcome	TRUE	reported	textfile	345727	0.0203992	1.69524e-09	7965	exposure	TRUE	reported	6xWbwJ	textfile	2	1	TRUE	0.00453623939120223	36.2866793363247	99.5778504438453	NA	NA	0.0045373735508854	7965	4.45784361802745e-06	345727	TRUE	8.15379526562736e-09
rs3916	C	G	C	G	0.386215	-0.0993797	0.265586	0.261922	FALSE	TRUE	FALSE	ZCrfYE	120739469	0.132761	0.0661076	outcome	TRUE	reported	textfile	345727	0.0168416	2.21794e-116	7965	exposure	TRUE	reported	6xWbwJ	textfile	2	1	TRUE	0.0619353461965923	525.753912338354	99.5778504438453	NA	NA	0.0619499382988958	7965	6.53670607739632e-06	345727	TRUE	3.19584377884848e-109
rs3999404	A	G	A	G	0.301197	-0.128241	0.0410838	0.0140737	FALSE	FALSE	FALSE	ZCrfYE	120690389	0.596591	0.242281	outcome	TRUE	reported	textfile	345727	0.0384444	4.70267e-15	7965	exposure	TRUE	reported	6xWbwJ	textfile	2	1	TRUE	0.00764742680923159	61.3657497618082	99.5778504438453	NA	NA	0.00764933285697643	7965	8.10371090700936e-07	345727	TRUE	1.91652826844272e-14
rs4371007	T	C	T	C	-0.152523	0.00843986	0.11687	0.0513201	FALSE	FALSE	FALSE	ZCrfYE	120950362	0.947896	0.129151	outcome	TRUE	reported	textfile	345727	0.024128	2.59162e-10	7965	exposure	TRUE	reported	6xWbwJ	textfile	2	1	TRUE	0.00499193418145591	39.9502006591599	99.5778504438453	NA	NA	0.00499318170338157	7965	1.23521952578976e-08	345727	TRUE	4.53393465661637e-10
rs55647329	T	C	T	C	-0.17677	0.073791	0.132135	0.147462	FALSE	FALSE	FALSE	ZCrfYE	120718163	0.362831	0.0810904	outcome	TRUE	reported	textfile	345727	0.0227902	8.7365e-15	7965	exposure	TRUE	reported	6xWbwJ	textfile	2	1	TRUE	0.00749664686411684	60.1466975303906	99.5778504438453	NA	NA	0.00749851561537655	7965	2.39516855172683e-06	345727	TRUE	5.39585238866881e-14
rs610803	G	A	G	A	0.11205	-0.0468893	0.806967	0.67144	FALSE	FALSE	FALSE	ZCrfYE	137612787	0.454802	0.0627337	outcome	TRUE	reported	textfile	345727	0.0196677	1.21808e-08	7965	exposure	TRUE	reported	6xWbwJ	textfile	2	1	TRUE	0.0040584913476029	32.4494624636048	99.5778504438453	NA	NA	0.00405950654686836	7965	1.61589897710138e-06	345727	TRUE	3.46110648458399e-08
rs6490297	C	T	C	T	0.208963	-0.043078	0.252214	0.318572	FALSE	FALSE	FALSE	ZCrfYE	120617356	0.489748	0.0623677	outcome	TRUE	reported	textfile	345727	0.0176087	1.75579e-32	7965	exposure	TRUE	reported	6xWbwJ	textfile	2	1	TRUE	0.0173734832513528	140.791078576104	99.5778504438453	NA	NA	0.0173777709747832	7965	1.37994005979093e-06	345727	TRUE	4.41885989767029e-31
rs7138861	C	T	C	T	-0.110246	0.0230016	0.349573	0.298383	FALSE	FALSE	FALSE	ZCrfYE	120618269	0.717343	0.0635384	outcome	TRUE	reported	textfile	345727	0.016312	1.39361e-11	7965	exposure	TRUE	reported	6xWbwJ	textfile	2	1	TRUE	0.00570219359425196	45.6669694919342	99.5778504438453	NA	NA	0.00570361759788439	7965	3.79064046878795e-07	345727	TRUE	3.5684914202179e-11
rs7304812	A	T	A	T	0.155775	-0.0660934	0.252959	0.33158	FALSE	TRUE	FALSE	ZCrfYE	120602900	0.29276	0.0628213	outcome	TRUE	reported	textfile	345727	0.0184165	2.71022e-17	7965	exposure	TRUE	reported	6xWbwJ	textfile	2	1	TRUE	0.00890249884835663	71.5273706644299	99.5778504438453	NA	NA	0.00890471490377147	7965	3.20162286458683e-06	345727	TRUE	2.57241255285378e-16
rs73419638	G	A	G	A	-0.124079	0.0567522	0.293405	0.265837	FALSE	FALSE	FALSE	ZCrfYE	121048096	0.386347	0.065514	outcome	TRUE	reported	textfile	345727	0.0169905	2.81685e-13	7965	exposure	TRUE	reported	6xWbwJ	textfile	2	1	TRUE	0.00665120356580801	53.3181639567607	99.5778504438453	NA	NA	0.00665286297909944	7965	2.17052824942191e-06	345727	TRUE	1.42377455444432e-12
Threonine levels
SNP	effect_allele.exposure	other_allele.exposure	effect_allele.outcome	other_allele.outcome	beta.exposure	beta.outcome	eaf.exposure	eaf.outcome	remove	palindromic	ambiguous	id.outcome	pos.outcome	pval.outcome	se.outcome	outcome	mr_keep.outcome	pval_origin.outcome	data_source.outcome	samplesize.outcome	se.exposure	pval.exposure	samplesize.exposure	exposure	mr_keep.exposure	pval_origin.exposure	id.exposure	data_source.exposure	action	SNP_index	mr_keep	R2	f	meanf	units.outcome	units.exposure	rsq.exposure	effective_n.exposure	rsq.outcome	effective_n.outcome	steiger_dir	steiger_pval
rs1047891	A	C	A	C	-0.122819	0.0496331	0.309002	0.32337	FALSE	FALSE	FALSE	AIKmPp	210675783	0.425271	0.0622507	outcome	TRUE	reported	textfile	345727	0.0166714	1.7443e-13	8245	exposure	TRUE	reported	2W79ii	textfile	2	1	TRUE	0.0065395354637898	54.2602275100949	47.5367195509693	NA	NA	0.00654111177329638	8245	1.83875023014009e-06	345727	TRUE	8.63355123606035e-13
rs1260326	C	T	C	T	0.123814	-0.123553	0.587649	0.650088	FALSE	FALSE	FALSE	AIKmPp	27508073	0.0417359	0.0606798	outcome	TRUE	reported	textfile	345727	0.0156531	2.57654e-15	8245	exposure	TRUE	reported	2W79ii	textfile	2	1	TRUE	0.00753121396027506	62.5509	47.5367195509693	NA	NA	0.00753302749445398	8245	1.19917430818088e-05	345727	TRUE	6.56902773385424e-14
rs17712208	A	T	A	T	0.268835	-0.021916	0.0297997	0.0177103	FALSE	TRUE	FALSE	AIKmPp	213977102	0.919663	0.217295	outcome	TRUE	reported	textfile	345727	0.045548	3.58644e-09	8245	exposure	TRUE	reported	2W79ii	textfile	2	1	TRUE	0.00420737517767668	34.827927748287	47.5367195509693	NA	NA	0.00420839171750316	8245	2.9423363625003e-08	345727	TRUE	6.12642652251504e-09
rs2079787	G	A	G	A	-0.144564	0.0986033	0.124787	0.114174	FALSE	FALSE	FALSE	AIKmPp	46794299	0.277246	0.0907509	outcome	TRUE	reported	textfile	345727	0.0232934	5.42737e-10	8245	exposure	TRUE	reported	2W79ii	textfile	2	1	TRUE	0.00464985881054652	38.5078422046856	47.5367195509693	NA	NA	0.00465098175908517	8245	3.41467008680109e-06	345727	TRUE	2.48246563858717e-09
Plasma free asparagine levels
SNP	effect_allele.exposure	other_allele.exposure	effect_allele.outcome	other_allele.outcome	beta.exposure	beta.outcome	eaf.exposure	eaf.outcome	remove	palindromic	ambiguous	id.outcome	pos.outcome	pval.outcome	se.outcome	outcome	mr_keep.outcome	pval_origin.outcome	data_source.outcome	samplesize.outcome	se.exposure	pval.exposure	samplesize.exposure	exposure	mr_keep.exposure	pval_origin.exposure	id.exposure	data_source.exposure	action	SNP_index	mr_keep	R2	f	meanf	units.outcome	units.exposure	rsq.exposure	effective_n.exposure	rsq.outcome	effective_n.outcome	steiger_dir	steiger_pval
rs10459574	G	C	G	C	-0.147234	0.0157327	0.26321	0.355992	FALSE	TRUE	FALSE	sCjVBp	103616705	0.795886	0.0608203	outcome	TRUE	reported	textfile	345727	0.0175545	4.97585e-17	8245	exposure	TRUE	reported	jcRtEH	textfile	2	1	TRUE	0.0084597780670149	70.328917641343	130.761883133904	NA	NA	0.00846181329520961	8245	1.93543476342316e-07	345727	TRUE	1.76126148610201e-16
rs115395195	A	G	A	G	-0.171498	0.0461685	0.123527	0.0758179	FALSE	FALSE	FALSE	sCjVBp	62332881	0.667841	0.10759	outcome	TRUE	reported	textfile	345727	0.0231446	1.26447e-13	8245	exposure	TRUE	reported	jcRtEH	textfile	2	1	TRUE	0.00661523982727224	54.8925492743855	130.761883133904	NA	NA	0.00661683426324985	8245	5.32619052575716e-07	345727	TRUE	4.19723698566785e-13
rs11622831	T	C	T	C	0.316708	-0.265219	0.0517304	0.0520767	FALSE	FALSE	FALSE	sCjVBp	104154330	0.0457172	0.132743	outcome	TRUE	reported	textfile	345727	0.0341085	1.61225e-20	8245	exposure	TRUE	reported	jcRtEH	textfile	2	1	TRUE	0.0103486662353215	86.1960701384138	130.761883133904	NA	NA	0.0103511511426676	8245	1.15464960029756e-05	345727	TRUE	8.35234237801333e-19
rs118182428	T	C	T	C	0.338071	-0.161389	0.0545775	0.0338549	FALSE	FALSE	FALSE	sCjVBp	103899823	0.31523	0.160697	outcome	TRUE	reported	textfile	345727	0.0336138	8.51341e-24	8245	exposure	TRUE	reported	jcRtEH	textfile	2	1	TRUE	0.0121197663897812	101.128892908272	130.761883133904	NA	NA	0.0121226713618653	8245	2.91742883209953e-06	345727	TRUE	1.5808893554568e-22
rs12886129	C	T	C	T	0.195682	-0.0203652	0.372846	0.327322	FALSE	FALSE	FALSE	sCjVBp	104143076	0.741454	0.0617259	outcome	TRUE	reported	textfile	345727	0.0158476	5.00713e-35	8245	exposure	TRUE	reported	jcRtEH	textfile	2	1	TRUE	0.0181562631793254	152.429629863305	130.761883133904	NA	NA	0.0181605884334213	8245	3.14855710994862e-07	345727	TRUE	8.82421913599598e-34
rs142679999	T	C	T	C	0.233095	-0.022149	0.0434407	0.0773484	FALSE	FALSE	FALSE	sCjVBp	103677792	0.838783	0.108867	outcome	TRUE	reported	textfile	345727	0.038116	9.63096e-10	8245	exposure	TRUE	reported	jcRtEH	textfile	2	1	TRUE	0.00451538899112164	37.3891781371633	130.761883133904	NA	NA	0.0045164796123345	8245	1.19725014453716e-07	345727	TRUE	1.8803270966416e-09
rs149784270	T	C	T	C	0.481292	-0.189415	0.0197393	0.00914211	FALSE	FALSE	FALSE	sCjVBp	104147597	0.540906	0.309784	outcome	TRUE	reported	textfile	345727	0.0550372	2.23302e-18	8245	exposure	TRUE	reported	jcRtEH	textfile	2	1	TRUE	0.00918976587778263	76.4538329558859	130.761883133904	NA	NA	0.00919197509621735	8245	1.08138294385483e-06	345727	TRUE	1.39785237739535e-17
rs1799795	A	G	A	G	0.180573	-0.0683398	0.0674308	0.0378219	FALSE	FALSE	FALSE	sCjVBp	103708488	0.647664	0.149537	outcome	TRUE	reported	textfile	345727	0.0306913	4.01582e-09	8245	exposure	TRUE	reported	jcRtEH	textfile	2	1	TRUE	0.00418085273668698	34.607457793135	130.761883133904	NA	NA	0.00418186289536313	8245	6.0411418318742e-07	345727	TRUE	9.44133088167653e-09
rs28393117	T	C	T	C	0.121884	0.04017	0.738568	0.775127	FALSE	FALSE	FALSE	sCjVBp	97866354	0.56581	0.0699543	outcome	TRUE	reported	textfile	345727	0.0176103	4.47941e-12	8245	exposure	TRUE	reported	jcRtEH	textfile	2	1	TRUE	0.00577634758936051	47.8910686379776	130.761883133904	NA	NA	0.00577774100761819	8245	9.53769946537322e-07	345727	TRUE	1.52524824536414e-11
rs715	C	T	C	T	-0.0933317	0.0335986	0.307428	0.313711	FALSE	FALSE	FALSE	sCjVBp	210678331	0.592685	0.062807	outcome	TRUE	reported	textfile	345727	0.0167886	2.70981e-08	8245	exposure	TRUE	reported	jcRtEH	textfile	2	1	TRUE	0.0037343402871869	30.8975489490976	130.761883133904	NA	NA	0.00373524296621611	8245	8.27742241412559e-07	345727	TRUE	6.347082461456e-08
rs8012505	G	C	G	C	0.630602	-0.222642	0.128388	0.121727	FALSE	TRUE	FALSE	sCjVBp	104104717	0.0129244	0.0895639	outcome	TRUE	reported	textfile	345727	0.0219561	2.08131e-181	8245	exposure	TRUE	reported	jcRtEH	textfile	2	1	TRUE	0.0909489901005732	824.69797319951	130.761883133904	NA	NA	0.0909690496533827	8245	1.78735018151624e-05	345727	TRUE	4.37906726987223e-167
rs8013778	C	G	C	G	-0.267891	0.127161	0.952559	0.921674	FALSE	TRUE	FALSE	sCjVBp	104154602	0.249495	0.110423	outcome	TRUE	reported	textfile	345727	0.0370636	4.90652e-13	8245	exposure	TRUE	reported	jcRtEH	textfile	2	1	TRUE	0.00629632709332443	52.2294781083572	130.761883133904	NA	NA	0.00629784515077931	8245	3.83580334898468e-06	345727	TRUE	3.41365941349695e-12
X-11381 levels
SNP	effect_allele.exposure	other_allele.exposure	effect_allele.outcome	other_allele.outcome	beta.exposure	beta.outcome	eaf.exposure	eaf.outcome	remove	palindromic	ambiguous	id.outcome	pos.outcome	pval.outcome	se.outcome	outcome	mr_keep.outcome	pval_origin.outcome	data_source.outcome	samplesize.outcome	se.exposure	pval.exposure	samplesize.exposure	exposure	mr_keep.exposure	pval_origin.exposure	id.exposure	data_source.exposure	action	SNP_index	mr_keep	R2	f	meanf	units.outcome	units.exposure	rsq.exposure	effective_n.exposure	rsq.outcome	effective_n.outcome	steiger_dir	steiger_pval
rs11242109	T	G	T	G	-0.139313	-0.143029	0.476425	0.343661	FALSE	FALSE	FALSE	Q2SKvH	132341354	0.0195407	0.061253	outcome	TRUE	reported	textfile	345727	0.0151713	4.20478e-20	8225	exposure	TRUE	reported	bUGejA	textfile	2	1	TRUE	0.0101478056281148	84.300874569398	56.7166038939484	NA	NA	0.0101502487274403	8225	1.57708768967002e-05	345727	TRUE	3.21784158776747e-18
rs1171617	T	G	T	G	0.178377	0.072087	0.769265	0.839945	FALSE	FALSE	FALSE	Q2SKvH	59707424	0.358055	0.078434	outcome	TRUE	reported	textfile	345727	0.0183417	2.35427e-22	8225	exposure	TRUE	reported	bUGejA	textfile	2	1	TRUE	0.0113683424151503	94.5568341480688	56.7166038939484	NA	NA	0.0113710759849253	8225	2.44328050729986e-06	345727	TRUE	3.30504369550025e-21
rs12208357	T	C	T	C	-0.32469	-0.109626	0.0685074	0.056886	FALSE	FALSE	FALSE	Q2SKvH	160122116	0.373995	0.123312	outcome	TRUE	reported	textfile	345727	0.029745	9.68677e-28	8225	exposure	TRUE	reported	bUGejA	textfile	2	1	TRUE	0.0142799784177269	119.125370245072	56.7166038939484	NA	NA	0.0142834019886245	8225	2.28604447103207e-06	345727	TRUE	2.25054268194632e-26
rs34059508	A	G	A	G	-0.364144	-0.145148	0.0252495	0.0100607	FALSE	FALSE	FALSE	Q2SKvH	160154805	0.607985	0.282966	outcome	TRUE	reported	textfile	345727	0.0481867	4.12666e-14	8225	exposure	TRUE	reported	bUGejA	textfile	2	1	TRUE	0.0068952670602868	57.093455660915	56.7166038939484	NA	NA	0.00689693256213974	8225	7.61066287944108e-07	345727	TRUE	1.56632971678547e-13
rs34130495	A	G	A	G	-0.322275	-0.207229	0.0271389	0.0178044	FALSE	FALSE	FALSE	Q2SKvH	160139792	0.348005	0.220817	outcome	TRUE	reported	textfile	345727	0.0470851	7.67314e-12	8225	exposure	TRUE	reported	bUGejA	textfile	2	1	TRUE	0.00566348457196846	46.8360891033448	56.7166038939484	NA	NA	0.00566485424283246	8225	2.54744115253793e-06	345727	TRUE	3.72290168617047e-11
rs35429994	T	G	T	G	-0.124132	-0.0225489	0.129103	0.132733	FALSE	FALSE	FALSE	Q2SKvH	159830547	0.79164	0.0853537	outcome	TRUE	reported	textfile	345727	0.0227378	4.78065e-08	8225	exposure	TRUE	reported	bUGejA	textfile	2	1	TRUE	0.00361047107035318	29.7964829512078	56.7166038939484	NA	NA	0.00361134603871264	8225	2.01871562277588e-07	345727	TRUE	8.71548591869807e-08
rs35566767	G	C	G	C	0.182253	-0.0742627	0.0863769	0.0762635	FALSE	TRUE	FALSE	Q2SKvH	132270356	0.495068	0.108847	outcome	TRUE	reported	textfile	345727	0.0270551	1.62405e-11	8225	exposure	TRUE	reported	bUGejA	textfile	2	1	TRUE	0.00548688292462266	45.367564805837	56.7166038939484	NA	NA	0.00548821012145064	8225	1.34640951653324e-06	345727	TRUE	5.86397652689959e-11
rs3798167	T	G	T	G	0.112505	0.181475	0.203003	0.158027	FALSE	FALSE	FALSE	Q2SKvH	160146896	0.0220065	0.079238	outcome	TRUE	reported	textfile	345727	0.0189822	3.0874e-09	8225	exposure	TRUE	reported	bUGejA	textfile	2	1	TRUE	0.00425269065786762	35.1192264860342	56.7166038939484	NA	NA	0.00425372059849757	8225	1.51715245934206e-05	345727	TRUE	3.71175136697902e-08
rs662138	G	C	G	C	-0.143574	0.048253	0.174642	0.147108	FALSE	TRUE	FALSE	Q2SKvH	160143444	0.5506	0.0808445	outcome	TRUE	reported	textfile	345727	0.0200419	7.85311e-13	8225	exposure	TRUE	reported	bUGejA	textfile	2	1	TRUE	0.0062006415174936	51.306	56.7166038939484	NA	NA	0.0062021402854053	8225	1.03042514400096e-06	345727	TRUE	2.92552840994337e-12
rs77010315	A	C	A	C	-0.435487	-0.348716	0.0119873	0.0043121	FALSE	FALSE	FALSE	Q2SKvH	151343594	0.463582	0.475763	outcome	TRUE	reported	textfile	345727	0.0697394	4.2519e-10	8225	exposure	TRUE	reported	bUGejA	textfile	2	1	TRUE	0.00471850046095599	38.9841761435444	56.7166038939484	NA	NA	0.00471964267932515	8225	1.55392824459723e-06	345727	TRUE	1.40783334368798e-09
rs7750288	G	A	G	A	-0.118523	-0.0480318	0.273304	0.278171	FALSE	FALSE	FALSE	Q2SKvH	159979115	0.460399	0.0650669	outcome	TRUE	reported	textfile	345727	0.0170381	3.4918e-12	8225	exposure	TRUE	reported	bUGejA	textfile	2	1	TRUE	0.0058489701583273	48.3790492271432	56.7166038939484	NA	NA	0.00585038442354301	8225	1.57618076239974e-06	345727	TRUE	1.42414766885639e-11
rs7923092	C	A	C	A	-0.0890725	-0.0507059	0.319713	0.271732	FALSE	FALSE	FALSE	Q2SKvH	59715291	0.437608	0.0653226	outcome	TRUE	reported	textfile	345727	0.0163329	4.93683e-08	8225	exposure	TRUE	reported	bUGejA	textfile	2	1	TRUE	0.00360294147567686	29.7341180416257	56.7166038939484	NA	NA	0.00360381462590002	8225	1.74284403430097e-06	345727	TRUE	1.37940951537314e-07
X-23739 levels
SNP	effect_allele.exposure	other_allele.exposure	effect_allele.outcome	other_allele.outcome	beta.exposure	beta.outcome	eaf.exposure	eaf.outcome	remove	palindromic	ambiguous	id.outcome	pos.outcome	pval.outcome	se.outcome	outcome	mr_keep.outcome	pval_origin.outcome	data_source.outcome	samplesize.outcome	se.exposure	pval.exposure	samplesize.exposure	exposure	mr_keep.exposure	pval_origin.exposure	id.exposure	data_source.exposure	action	SNP_index	mr_keep	R2	f	meanf	units.outcome	units.exposure	rsq.exposure	effective_n.exposure	rsq.outcome	effective_n.outcome	steiger_dir	steiger_pval
rs118182428	T	C	T	C	0.216799	-0.161389	0.054915	0.0338549	FALSE	FALSE	FALSE	XhwMkj	103899823	0.31523	0.160697	outcome	TRUE	reported	textfile	345727	0.0333846	8.3601e-11	8249	exposure	TRUE	reported	0xlCot	textfile	2	1	TRUE	0.00508635046060693	42.1615808246728	77.4829793246242	NA	NA	0.00508757768826729	8249	2.91742883209953e-06	345727	TRUE	3.88043159735404e-10
rs12292586	T	C	T	C	-0.140961	0.044796	0.121936	0.0759253	FALSE	FALSE	FALSE	XhwMkj	62388840	0.677075	0.107565	outcome	TRUE	reported	textfile	345727	0.0232037	1.24042e-09	8249	exposure	TRUE	reported	0xlCot	textfile	2	1	TRUE	0.00445393134637362	36.8959036352973	77.4829793246242	NA	NA	0.0044550066680791	8249	5.0165541635532e-07	345727	TRUE	2.93195183530389e-09
rs12884809	A	G	A	G	-0.0962512	0.0348408	0.333842	0.420478	FALSE	FALSE	FALSE	XhwMkj	103628983	0.553854	0.0588531	outcome	TRUE	reported	textfile	345727	0.0161743	2.66738e-09	8249	exposure	TRUE	reported	0xlCot	textfile	2	1	TRUE	0.00427464035786987	35.4042996796053	77.4829793246242	NA	NA	0.00427567257889456	8249	1.01369271250562e-06	345727	TRUE	7.19810287792291e-09
rs149784270	T	C	T	C	0.324749	-0.189415	0.0200983	0.00914211	FALSE	FALSE	FALSE	XhwMkj	104147597	0.540906	0.309784	outcome	TRUE	reported	textfile	345727	0.0542843	2.19907e-09	8249	exposure	TRUE	reported	0xlCot	textfile	2	1	TRUE	0.00431982068018512	35.780124872852	77.4829793246242	NA	NA	0.00432086376380912	8249	1.08138294385483e-06	345727	TRUE	6.08766025256346e-09
rs1557014	G	A	G	A	-0.152327	0.019462	0.551841	0.56797	FALSE	FALSE	FALSE	XhwMkj	104144126	0.739421	0.0585115	outcome	TRUE	reported	textfile	345727	0.0152339	1.53639e-23	8249	exposure	TRUE	reported	0xlCot	textfile	2	1	TRUE	0.0119756180313364	99.9600047396034	77.4829793246242	NA	NA	0.011978487479194	8249	3.20008525355521e-07	345727	TRUE	1.01131863661478e-22
rs2282377	G	C	G	C	0.391216	-0.222815	0.129058	0.121675	FALSE	TRUE	FALSE	XhwMkj	104105483	0.0128393	0.0895487	outcome	TRUE	reported	textfile	345727	0.0223557	1.44265e-68	8249	exposure	TRUE	reported	0xlCot	textfile	2	1	TRUE	0.0357951890988195	306.162053082952	77.4829793246242	NA	NA	0.0358035590743091	8249	1.79073662196365e-05	345727	TRUE	2.11534392420494e-63
rs4665972	C	T	C	T	0.0906229	-0.0622833	0.591238	0.624421	FALSE	FALSE	FALSE	XhwMkj	27375230	0.29766	0.0598035	outcome	TRUE	reported	textfile	345727	0.0156384	6.83633e-09	8249	exposure	TRUE	reported	0xlCot	textfile	2	1	TRUE	0.00405439067801788	33.5726766689361	77.4829793246242	NA	NA	0.0040553699307459	8249	3.13731321343299e-06	345727	TRUE	2.63939276806424e-08
rs8013778	C	G	C	G	-0.201393	0.127161	0.952531	0.921674	FALSE	TRUE	FALSE	XhwMkj	104154602	0.249495	0.110423	outcome	TRUE	reported	textfile	345727	0.0368094	4.46879e-08	8249	exposure	TRUE	reported	0xlCot	textfile	2	1	TRUE	0.0036157369035794	29.927191093075	77.4829793246242	NA	NA	0.00361661059345237	8249	3.83580334898468e-06	345727	TRUE	1.71560933341953e-07
X-24241 levels
SNP	effect_allele.exposure	other_allele.exposure	effect_allele.outcome	other_allele.outcome	beta.exposure	beta.outcome	eaf.exposure	eaf.outcome	remove	palindromic	ambiguous	id.outcome	pos.outcome	pval.outcome	se.outcome	outcome	mr_keep.outcome	pval_origin.outcome	data_source.outcome	samplesize.outcome	se.exposure	pval.exposure	samplesize.exposure	exposure	mr_keep.exposure	pval_origin.exposure	id.exposure	data_source.exposure	action	SNP_index	mr_keep	R2	f	meanf	units.outcome	units.exposure	rsq.exposure	effective_n.exposure	rsq.outcome	effective_n.outcome	steiger_dir	steiger_pval
rs1050152	T	C	T	C	-0.107399	-0.137112	0.430152	0.315889	FALSE	FALSE	FALSE	G3RjHt	132340627	0.0285957	0.0626361	outcome	TRUE	reported	textfile	345727	0.0156755	7.31396e-12	8053	exposure	TRUE	reported	a4PkDh	textfile	2	1	TRUE	0.005795298152046	46.9299182908691	43.0399831346922	NA	NA	0.00579672945359278	8053	1.38600472001882e-05	345727	TRUE	1.22822088909134e-10
rs1171614	C	T	C	T	0.163222	0.0729316	0.770896	0.841179	FALSE	FALSE	FALSE	G3RjHt	59709780	0.353889	0.0786687	outcome	TRUE	reported	textfile	345727	0.0188775	5.31586e-18	8053	exposure	TRUE	reported	a4PkDh	textfile	2	1	TRUE	0.00919808818722856	74.7412849253472	43.0399831346922	NA	NA	0.00920035212028956	8053	2.48596878302355e-06	345727	TRUE	4.70313683677009e-17
rs12208357	T	C	T	C	-0.190394	-0.109626	0.069401	0.056886	FALSE	FALSE	FALSE	G3RjHt	160122116	0.373995	0.123312	outcome	TRUE	reported	textfile	345727	0.0303378	3.47857e-10	8053	exposure	TRUE	reported	a4PkDh	textfile	2	1	TRUE	0.00486700480903013	39.3758984043956	43.0399831346922	NA	NA	0.00486820796670432	8053	2.28604447103207e-06	345727	TRUE	1.32404282563825e-09
rs154484	T	C	T	C	0.116581	-0.0288708	0.176048	0.228241	FALSE	FALSE	FALSE	G3RjHt	132214749	0.67582	0.06904	outcome	TRUE	reported	textfile	345727	0.0202622	8.73542e-09	8053	exposure	TRUE	reported	a4PkDh	textfile	2	1	TRUE	0.00409395464012974	33.0959220111715	43.0399831346922	NA	NA	0.00409496748077786	8053	5.05807268627796e-07	345727	TRUE	1.90450969413741e-08
rs34059508	A	G	A	G	-0.33036	-0.145148	0.0256028	0.0100607	FALSE	FALSE	FALSE	G3RjHt	160154805	0.607985	0.282966	outcome	TRUE	reported	textfile	345727	0.0489551	1.49658e-11	8053	exposure	TRUE	reported	a4PkDh	textfile	2	1	TRUE	0.00562305560204071	45.5272227569989	43.0399831346922	NA	NA	0.00562444460440993	8053	7.61066287944108e-07	345727	TRUE	4.48976843226401e-11
rs56303410	A	G	A	G	-0.0934893	-0.0508629	0.319211	0.271744	FALSE	FALSE	FALSE	G3RjHt	59715837	0.436023	0.0652986	outcome	TRUE	reported	textfile	345727	0.0167221	2.2608e-08	8053	exposure	TRUE	reported	a4PkDh	textfile	2	1	TRUE	0.00386635824497316	31.2488695547279	43.0399831346922	NA	NA	0.00386731499713307	8053	1.75494273170094e-06	345727	TRUE	6.4671857494624e-08
rs77010315	A	C	A	C	-0.391863	-0.348716	0.0120572	0.0043121	FALSE	FALSE	FALSE	G3RjHt	151343594	0.463582	0.475763	outcome	TRUE	reported	textfile	345727	0.0711089	3.57303e-08	8053	exposure	TRUE	reported	a4PkDh	textfile	2	1	TRUE	0.00375688784085373	30.3607659993353	43.0399831346922	NA	NA	0.00375781760613546	8053	1.55392824459723e-06	345727	TRUE	9.64092613955715e-08
X-25422 levels
SNP	effect_allele.exposure	other_allele.exposure	effect_allele.outcome	other_allele.outcome	beta.exposure	beta.outcome	eaf.exposure	eaf.outcome	remove	palindromic	ambiguous	id.outcome	pos.outcome	pval.outcome	se.outcome	outcome	mr_keep.outcome	pval_origin.outcome	data_source.outcome	samplesize.outcome	se.exposure	pval.exposure	samplesize.exposure	exposure	mr_keep.exposure	pval_origin.exposure	id.exposure	data_source.exposure	action	SNP_index	mr_keep	R2	f	meanf	units.outcome	units.exposure	rsq.exposure	effective_n.exposure	rsq.outcome	effective_n.outcome	steiger_dir	steiger_pval
rs10240723	T	C	T	C	-0.241981	-0.125676	0.381729	0.427833	FALSE	FALSE	FALSE	fTkBRu	97981884	0.0325732	0.058801	outcome	TRUE	reported	textfile	345727	0.0147294	1.19812e-60	8210	exposure	TRUE	reported	II54km	textfile	2	1	TRUE	0.031827463144028	269.827750262911	95.652031266771	NA	NA	0.031834971486319	8210	1.32129183601157e-05	345727	TRUE	2.16949737016378e-56
rs10248654	A	G	A	G	0.184982	0.0977466	0.288351	0.295335	FALSE	FALSE	FALSE	fTkBRu	97983401	0.126865	0.0640297	outcome	TRUE	reported	textfile	345727	0.0160674	1.13623e-30	8210	exposure	TRUE	reported	II54km	textfile	2	1	TRUE	0.0158879952946007	132.514047948354	95.652031266771	NA	NA	0.0158918051158408	8210	6.7407259831319e-06	345727	TRUE	1.05984506871564e-28
rs1047891	A	C	A	C	0.0853351	0.0496331	0.308919	0.32337	FALSE	FALSE	FALSE	fTkBRu	210675783	0.425271	0.0622507	outcome	TRUE	reported	textfile	345727	0.0156234	4.70748e-08	8210	exposure	TRUE	reported	II54km	textfile	2	1	TRUE	0.00362064431839421	29.8262387673116	95.652031266771	NA	NA	0.00362152334667648	8210	1.83875023014009e-06	345727	TRUE	1.33990399857999e-07
rs117400919	T	C	T	C	0.342896	-0.196516	0.0176319	0.00699742	FALSE	FALSE	FALSE	fTkBRu	97674714	0.542052	0.32231	outcome	TRUE	reported	textfile	345727	0.0538417	1.90759e-10	8210	exposure	TRUE	reported	II54km	textfile	2	1	TRUE	0.00491591013877503	40.5491262800641	95.652031266771	NA	NA	0.00491710208275817	8210	1.07526873626012e-06	345727	TRUE	5.79439420298412e-10
rs13245475	A	G	A	G	0.208492	0.189854	0.060061	0.0441255	FALSE	FALSE	FALSE	fTkBRu	97971740	0.183977	0.142897	outcome	TRUE	reported	textfile	345727	0.0304011	6.98009e-12	8210	exposure	TRUE	reported	II54km	textfile	2	1	TRUE	0.00569608142445656	47.0212733335288	95.652031266771	NA	NA	0.00569746145082598	8210	5.10575860656403e-06	345727	TRUE	5.06957660022322e-11
rs17268494	T	C	T	C	0.177546	0.200908	0.0941828	0.0860856	FALSE	FALSE	FALSE	fTkBRu	97658428	0.052383	0.103562	outcome	TRUE	reported	textfile	345727	0.0248144	8.3709e-13	8210	exposure	TRUE	reported	II54km	textfile	2	1	TRUE	0.00619685645920933	51.1809588727694	95.652031266771	NA	NA	0.00619835705524496	8210	1.08857433235591e-05	345727	TRUE	1.30264712046418e-11
rs2169387	G	A	G	A	-0.134199	0.0902311	0.90217	0.853402	FALSE	FALSE	FALSE	fTkBRu	9323885	0.27659	0.082932	outcome	TRUE	reported	textfile	345727	0.0244416	4.00599e-08	8210	exposure	TRUE	reported	II54km	textfile	2	1	TRUE	0.00365851089594801	30.1393224736074	95.652031266771	NA	NA	0.00365939908379999	8210	3.42401732388468e-06	345727	TRUE	1.46232588749866e-07
rs2282377	G	C	G	C	-0.198248	-0.222815	0.12992	0.121675	FALSE	TRUE	FALSE	fTkBRu	104105483	0.0128393	0.0895487	outcome	TRUE	reported	textfile	345727	0.0213001	1.31041e-20	8210	exposure	TRUE	reported	II54km	textfile	2	1	TRUE	0.0104412565761551	86.6061105989073	95.652031266771	NA	NA	0.0104437741712941	8210	1.79073662196365e-05	345727	TRUE	1.32880986645366e-18
rs56849186	A	G	A	G	0.321274	0.0855528	0.12011	0.102072	FALSE	FALSE	FALSE	fTkBRu	97875494	0.382575	0.0979806	outcome	TRUE	reported	textfile	345727	0.0217738	2.85298e-49	8210	exposure	TRUE	reported	II54km	textfile	2	1	TRUE	0.025832890753659	217.659131881463	95.652031266771	NA	NA	0.0258390226723002	8210	2.20524336187524e-06	345727	TRUE	6.38688844000108e-47
rs74882275	T	C	T	C	-0.192322	0.00201087	0.0803628	0.0927413	FALSE	FALSE	FALSE	fTkBRu	97899930	0.984473	0.103326	outcome	TRUE	reported	textfile	345727	0.0268755	8.30438e-13	8210	exposure	TRUE	reported	II54km	textfile	2	1	TRUE	0.00619870869577447	51.1963522487933	95.652031266771	NA	NA	0.00620020973753903	8210	1.09551409572921e-09	345727	TRUE	1.64297201744324e-12
5-acetylamino-6-formylamino-3-methyluracil levels
SNP	effect_allele.exposure	other_allele.exposure	effect_allele.outcome	other_allele.outcome	beta.exposure	beta.outcome	eaf.exposure	eaf.outcome	remove	palindromic	ambiguous	id.outcome	pos.outcome	pval.outcome	se.outcome	outcome	mr_keep.outcome	pval_origin.outcome	data_source.outcome	samplesize.outcome	se.exposure	pval.exposure	samplesize.exposure	exposure	mr_keep.exposure	pval_origin.exposure	id.exposure	data_source.exposure	action	SNP_index	mr_keep	R2	f	meanf	units.outcome	units.exposure	rsq.exposure	effective_n.exposure	rsq.outcome	effective_n.outcome	steiger_dir	steiger_pval
rs10102312	G	T	G	T	-0.0957081	0.0150571	0.648396	0.69489	FALSE	FALSE	FALSE	8n5JT8	18236002	0.81072	0.0628696	outcome	TRUE	reported	textfile	345727	0.0171437	2.36802e-08	7599	exposure	TRUE	reported	zKibgZ	textfile	2	1	TRUE	0.00408464442851044	31.1583143585402	153.340020137051	NA	NA	0.00408571536591573	7599	1.6590918031799e-07	345727	TRUE	4.17906999243105e-08
rs1041983	T	C	T	C	-0.437576	0.00217534	0.301283	0.277428	FALSE	FALSE	FALSE	8n5JT8	18400285	0.973149	0.0646278	outcome	TRUE	reported	textfile	345727	0.0169864	2.46726e-146	7599	exposure	TRUE	reported	zKibgZ	textfile	2	1	TRUE	0.0803133484534685	663.422163597783	153.340020137051	NA	NA	0.0803327933798412	7599	3.2770627695487e-09	345727	TRUE	3.14192678658501e-139
rs1115784	G	A	G	A	0.626255	0.0537697	0.295497	0.328335	FALSE	FALSE	FALSE	8n5JT8	18397900	0.380414	0.0613016	outcome	TRUE	reported	textfile	345727	0.0162373	1e-200	7599	exposure	TRUE	reported	zKibgZ	textfile	2	1	TRUE	0.16371001062949	1487.16948254803	153.340020137051	NA	NA	0.163746051999167	7599	2.22535783578151e-06	345727	TRUE	1.1912744253028e-297
rs112556119	C	T	C	T	-0.384182	-0.526601	0.0172232	0.00934829	FALSE	FALSE	FALSE	8n5JT8	18371207	0.0691672	0.289766	outcome	TRUE	reported	textfile	345727	0.0621544	6.36596e-10	7599	exposure	TRUE	reported	zKibgZ	textfile	2	1	TRUE	0.00500259990838176	38.1958299594319	153.340020137051	NA	NA	0.00500391031179024	7599	9.55286352757351e-06	345727	TRUE	5.14832918357929e-09
rs116868278	C	G	C	G	0.247026	0.136827	0.0467778	0.0635924	FALSE	TRUE	FALSE	8n5JT8	18244846	0.256681	0.12063	outcome	TRUE	reported	textfile	345727	0.0381964	9.97917e-11	7599	exposure	TRUE	reported	zKibgZ	textfile	2	1	TRUE	0.00547394196840976	41.8144268801934	153.340020137051	NA	NA	0.00547537515784836	7599	3.72135029663639e-06	345727	TRUE	4.82253818234103e-10
rs117876716	C	T	C	T	0.623181	-0.174354	0.00874733	0.0105167	FALSE	FALSE	FALSE	8n5JT8	18301779	0.532015	0.278996	outcome	TRUE	reported	textfile	345727	0.0879316	1.36936e-12	7599	exposure	TRUE	reported	zKibgZ	textfile	2	1	TRUE	0.00656630269349124	50.2139213695929	153.340020137051	NA	NA	0.00656801999639662	7599	1.12963099786082e-06	345727	TRUE	4.82198085755128e-12
rs117926876	T	C	T	C	-0.136159	0.0314562	0.12245	0.127421	FALSE	FALSE	FALSE	8n5JT8	18467415	0.718358	0.0872199	outcome	TRUE	reported	textfile	345727	0.0248554	4.3009e-08	7599	exposure	TRUE	reported	zKibgZ	textfile	2	1	TRUE	0.0039335354365424	30.0010790188678	153.340020137051	NA	NA	0.00393456691177687	7599	3.7622737925499e-07	345727	TRUE	8.22870433630908e-08
rs13265671	T	A	T	A	0.404526	0.231491	0.057141	0.0572471	FALSE	TRUE	FALSE	8n5JT8	18142777	0.0619213	0.124	outcome	TRUE	reported	textfile	345727	0.0344069	6.48999e-32	7599	exposure	TRUE	reported	zKibgZ	textfile	2	1	TRUE	0.0178655459403235	138.193454009904	153.340020137051	NA	NA	0.0178701652073191	7599	1.00806767416211e-05	345727	TRUE	1.03789192396896e-29
rs13274103	T	C	T	C	-0.104111	-0.079118	0.35319	0.283808	FALSE	FALSE	FALSE	8n5JT8	18658330	0.218109	0.0642414	outcome	TRUE	reported	textfile	345727	0.0169127	7.47068e-10	7599	exposure	TRUE	reported	zKibgZ	textfile	2	1	TRUE	0.00496192959731358	37.8837556793541	153.340020137051	NA	NA	0.00496322940049969	7599	4.38720488098723e-06	345727	TRUE	3.56459687486684e-09
rs140768603	T	A	T	A	0.39313	0.520401	0.0441469	0.0167659	FALSE	TRUE	FALSE	8n5JT8	18471319	0.00370621	0.179316	outcome	TRUE	reported	textfile	345727	0.0395183	2.57191e-23	7599	exposure	TRUE	reported	zKibgZ	textfile	2	1	TRUE	0.0128558266302957	98.937640058155	153.340020137051	NA	NA	0.0128591675573463	7599	2.43610943920924e-05	345727	TRUE	5.82485545099278e-21
rs17517109	G	T	G	T	0.703642	-0.069283	0.0162101	0.0205479	FALSE	FALSE	FALSE	8n5JT8	18424628	0.744463	0.212558	outcome	TRUE	reported	textfile	345727	0.0636887	2.23786e-28	7599	exposure	TRUE	reported	zKibgZ	textfile	2	1	TRUE	0.0158089027512036	122.029384879239	153.340020137051	NA	NA	0.0158129988198071	7599	3.07303523918153e-07	345727	TRUE	1.96882734136013e-27
rs17693928	T	G	T	G	-0.211324	-0.0562948	0.134512	0.185156	FALSE	FALSE	FALSE	8n5JT8	18436595	0.454479	0.0752637	outcome	TRUE	reported	textfile	345727	0.0240965	1.78806e-18	7599	exposure	TRUE	reported	zKibgZ	textfile	2	1	TRUE	0.0100198165349131	76.8909797257768	153.340020137051	NA	NA	0.0100224279324768	7599	1.61820650903689e-06	345727	TRUE	1.22760105237594e-17
rs2410556	C	T	C	T	-0.15083	0.067244	0.135279	0.116814	FALSE	FALSE	FALSE	8n5JT8	18396957	0.459941	0.0910002	outcome	TRUE	reported	textfile	345727	0.0239041	2.79392e-10	7599	exposure	TRUE	reported	zKibgZ	textfile	2	1	TRUE	0.00521200423121291	39.8030498085418	153.340020137051	NA	NA	0.00521336919952379	7599	1.57939556483247e-06	345727	TRUE	8.9324484058755e-10
rs28359501	T	A	T	A	-0.181407	-0.0400715	0.0942328	0.0749765	FALSE	TRUE	FALSE	8n5JT8	18216734	0.716635	0.110402	outcome	TRUE	reported	textfile	345727	0.0281159	1.103e-10	7599	exposure	TRUE	reported	zKibgZ	textfile	2	1	TRUE	0.00544847479075603	41.6188220883428	153.340020137051	NA	NA	0.0054499013489081	7599	3.81053861229588e-07	345727	TRUE	2.56653944106197e-10
rs3887027	T	C	T	C	-0.148665	-0.0175884	0.388366	0.408705	FALSE	FALSE	FALSE	8n5JT8	18155109	0.765145	0.0588771	outcome	TRUE	reported	textfile	345727	0.0166895	5.21023e-19	7599	exposure	TRUE	reported	zKibgZ	textfile	2	1	TRUE	0.0103338720650964	79.3261725975745	153.340020137051	NA	NA	0.0103365644582333	7599	2.58124334418208e-07	345727	TRUE	2.10020825783876e-18
rs4921893	C	A	C	A	0.177021	0.0665676	0.448476	0.494414	FALSE	FALSE	FALSE	8n5JT8	18336709	0.252165	0.0581322	outcome	TRUE	reported	textfile	345727	0.0168509	8.17951e-26	7599	exposure	TRUE	reported	zKibgZ	textfile	2	1	TRUE	0.0143147962132307	110.328841717542	153.340020137051	NA	NA	0.0143185107925776	7599	3.79279917766539e-06	345727	TRUE	2.02358204905118e-24
rs4986782	A	G	A	G	0.608442	-0.132462	0.0192282	0.0451636	FALSE	FALSE	FALSE	8n5JT8	18222607	0.348683	0.141346	outcome	TRUE	reported	textfile	345727	0.0582786	1.62392e-25	7599	exposure	TRUE	reported	zKibgZ	textfile	2	1	TRUE	0.0141409482686591	108.969719158474	153.340020137051	NA	NA	0.0141446183831653	7599	2.54029224281464e-06	345727	TRUE	2.84796202091977e-24
rs55875992	A	C	A	C	0.285392	-0.0193259	0.0258996	0.0319948	FALSE	FALSE	FALSE	8n5JT8	18318778	0.90419	0.160553	outcome	TRUE	reported	textfile	345727	0.0509278	2.09628e-08	7599	exposure	TRUE	reported	zKibgZ	textfile	2	1	TRUE	0.00411553473832501	31.3949243086544	153.340020137051	NA	NA	0.00411661374126603	7599	4.19094346749773e-08	345727	TRUE	3.36188052594754e-08
rs58153262	G	A	G	A	-0.19625	-0.295114	0.0976627	0.0838145	FALSE	FALSE	FALSE	8n5JT8	18430966	0.00853434	0.112204	outcome	TRUE	reported	textfile	345727	0.0277768	1.60325e-12	7599	exposure	TRUE	reported	zKibgZ	textfile	2	1	TRUE	0.0065261179227367	49.9046011711609	153.340020137051	NA	NA	0.00652782478506879	7599	2.00089118559197e-05	345727	TRUE	4.24818219162041e-11
rs62492998	G	A	G	A	0.578517	0.322763	0.00970938	0.0145906	FALSE	FALSE	FALSE	8n5JT8	18398317	0.189925	0.246233	outcome	TRUE	reported	textfile	345727	0.0830993	3.36066e-12	7599	exposure	TRUE	reported	zKibgZ	textfile	2	1	TRUE	0.00633752904843367	48.4532822647957	153.340020137051	NA	NA	0.00633918690134069	7599	4.96983568925254e-06	345727	TRUE	2.28472238815296e-11
rs62494884	G	A	G	A	0.286989	-0.0610307	0.0865372	0.0472596	FALSE	FALSE	FALSE	8n5JT8	18467807	0.656413	0.137188	outcome	TRUE	reported	textfile	345727	0.028853	2.60993e-23	7599	exposure	TRUE	reported	zKibgZ	textfile	2	1	TRUE	0.0128521068900184	98.9086404630474	153.340020137051	NA	NA	0.0128554468629848	7599	5.72444542000729e-07	345727	TRUE	1.80898659511412e-22
rs6997046	A	G	A	G	0.478347	0.0691304	0.146873	0.198306	FALSE	FALSE	FALSE	8n5JT8	18356334	0.344111	0.0730709	outcome	TRUE	reported	textfile	345727	0.022086	5.0685e-104	7599	exposure	TRUE	reported	zKibgZ	textfile	2	1	TRUE	0.0581408643127123	468.962002328898	153.340020137051	NA	NA	0.0581552804417221	7599	2.58891216930226e-06	345727	TRUE	1.51144901950429e-98
rs6997861	A	G	A	G	0.131044	-0.0352254	0.314233	0.390556	FALSE	FALSE	FALSE	8n5JT8	18499695	0.553279	0.0594166	outcome	TRUE	reported	textfile	345727	0.0176116	1.0007e-13	7599	exposure	TRUE	reported	zKibgZ	textfile	2	1	TRUE	0.00723315011460368	55.3506006238902	153.340020137051	NA	NA	0.00723504054977025	7599	1.01663497605003e-06	345727	TRUE	3.75705863155984e-13
rs73207887	G	A	G	A	0.577566	0.101643	0.0367492	0.0380874	FALSE	FALSE	FALSE	8n5JT8	18424318	0.498246	0.150082	outcome	TRUE	reported	textfile	345727	0.0426797	1.00465e-41	7599	exposure	TRUE	reported	zKibgZ	textfile	2	1	TRUE	0.0235321721641933	183.082234596097	153.340020137051	NA	NA	0.0235382214643603	7599	1.32668057742521e-06	345727	TRUE	5.66385796691759e-40
rs73592140	G	A	G	A	-0.267142	0.0291198	0.0506573	0.0438529	FALSE	FALSE	FALSE	8n5JT8	18376394	0.837629	0.142098	outcome	TRUE	reported	textfile	345727	0.0369247	4.66243e-13	7599	exposure	TRUE	reported	zKibgZ	textfile	2	1	TRUE	0.00684089272362188	52.328233855578	153.340020137051	NA	NA	0.0068426813461504	7599	1.2147027281705e-07	345727	TRUE	1.09603902430229e-12
rs7817770	T	C	T	C	0.108471	0.000617435	0.397236	0.447055	FALSE	FALSE	FALSE	8n5JT8	18449651	0.991623	0.0588086	outcome	TRUE	reported	textfile	345727	0.0170098	1.80644e-10	7599	exposure	TRUE	reported	zKibgZ	textfile	2	1	TRUE	0.00532297608764908	40.655055224673	153.340020137051	NA	NA	0.00532436996275601	7599	3.18837960047073e-10	345727	TRUE	2.96723288693974e-10
rs7837306	T	C	T	C	-0.286778	-0.0670796	0.755485	0.708436	FALSE	FALSE	FALSE	8n5JT8	18218077	0.294159	0.0639437	outcome	TRUE	reported	textfile	345727	0.0185831	9.94566e-54	7599	exposure	TRUE	reported	zKibgZ	textfile	2	1	TRUE	0.030387644147731	238.089924490902	153.340020137051	NA	NA	0.030395400893689	7599	3.18312164578022e-06	345727	TRUE	4.5354795799466e-51
rs79409592	T	C	T	C	-0.420559	-0.156111	0.0236495	0.036602	FALSE	FALSE	FALSE	8n5JT8	18403606	0.310644	0.153975	outcome	TRUE	reported	textfile	345727	0.052975	2.04106e-15	7599	exposure	TRUE	reported	zKibgZ	textfile	2	1	TRUE	0.00822561493084922	63.0082784657767	153.340020137051	NA	NA	0.00822776260401598	7599	2.97327109813694e-06	345727	TRUE	1.43695674538121e-14
rs79451156	G	A	G	A	0.175251	-0.0653976	0.101768	0.0472963	FALSE	FALSE	FALSE	8n5JT8	18117837	0.63105	0.136174	outcome	TRUE	reported	textfile	345727	0.0273011	1.36997e-10	7599	exposure	TRUE	reported	zKibgZ	textfile	2	1	TRUE	0.00539331328565358	41.1951795402295	153.340020137051	NA	NA	0.00539472547937243	7599	6.67120301069044e-07	345727	TRUE	3.53580109509118e-10
rs79782859	C	G	C	G	-0.356824	0.0210984	0.0173323	0.0306434	FALSE	TRUE	FALSE	8n5JT8	18374411	0.900143	0.16814	outcome	TRUE	reported	textfile	345727	0.0621912	9.60683e-09	7599	exposure	TRUE	reported	zKibgZ	textfile	2	1	TRUE	0.00431336761432834	32.9106093224718	153.340020137051	NA	NA	0.00431449826000354	7599	4.55434737172026e-08	345727	TRUE	1.57984825113433e-08
Ethylmalonate levels
SNP	effect_allele.exposure	other_allele.exposure	effect_allele.outcome	other_allele.outcome	beta.exposure	beta.outcome	eaf.exposure	eaf.outcome	remove	palindromic	ambiguous	id.outcome	pos.outcome	pval.outcome	se.outcome	outcome	mr_keep.outcome	pval_origin.outcome	data_source.outcome	samplesize.outcome	se.exposure	pval.exposure	samplesize.exposure	exposure	mr_keep.exposure	pval_origin.exposure	id.exposure	data_source.exposure	action	SNP_index	mr_keep	R2	f	meanf	units.outcome	units.exposure	rsq.exposure	effective_n.exposure	rsq.outcome	effective_n.outcome	steiger_dir	steiger_pval
rs11064925	A	G	A	G	0.120134	-0.0693078	0.484145	0.517411	FALSE	FALSE	FALSE	PspFtY	119845807	0.231367	0.0579088	outcome	TRUE	reported	textfile	345727	0.0151335	2.04974e-15	8172	exposure	TRUE	reported	ZIy9kb	textfile	2	1	TRUE	0.00765224116036373	63.0009	174.03010295952	NA	NA	0.00765410007594286	8172	4.14326309211469e-06	345727	TRUE	1.9518984263573e-14
rs11065026	T	C	T	C	-0.229691	-0.0889439	0.0512123	0.07303	FALSE	FALSE	FALSE	PspFtY	120122124	0.444043	0.116208	outcome	TRUE	reported	textfile	345727	0.0345091	2.81486e-11	8172	exposure	TRUE	reported	ZIy9kb	textfile	2	1	TRUE	0.00539193081956466	44.2908882009599	174.03010295952	NA	NA	0.0053932436349436	8172	1.69445001502484e-06	345727	TRUE	1.07459691206041e-10
rs11065178	C	T	C	T	0.325559	0.0346131	0.0201054	0.01601	FALSE	FALSE	FALSE	PspFtY	120629626	0.87899	0.227343	outcome	TRUE	reported	textfile	345727	0.0544251	2.20708e-09	8172	exposure	TRUE	reported	ZIy9kb	textfile	2	1	TRUE	0.00435948455419485	35.7729403888552	174.03010295952	NA	NA	0.00436054709392961	8172	6.7048182001193e-08	345727	TRUE	3.99168595933056e-09
rs11065382	T	C	T	G	-0.323164	1.51425	0.0224091	0.00111922	TRUE	FALSE	FALSE	PspFtY	120982114	0.00265314	0.503858	outcome	TRUE	reported	textfile	345727	0.0514288	3.30578e-10	8172	exposure	TRUE	reported	ZIy9kb	textfile	2	1	FALSE	0.00480852036084086	39.4754297558035	174.03010295952	NA	NA	0.0048096918156413	8172	2.61238220561002e-05	345727	TRUE	8.98802784006473e-09
rs11076641	C	T	C	T	0.155381	-0.118059	0.08931	0.231964	FALSE	FALSE	FALSE	PspFtY	89862104	0.089384	0.0695015	outcome	TRUE	reported	textfile	345727	0.026681	5.75757e-09	8172	exposure	TRUE	reported	ZIy9kb	textfile	2	1	TRUE	0.00413299238773244	33.9066838741191	174.03010295952	NA	NA	0.00413399995360696	8172	8.34594340058397e-06	345727	TRUE	3.93722207970596e-08
rs112575738	T	C	T	C	-0.345107	-0.0813252	0.0340282	0.0458243	FALSE	FALSE	FALSE	PspFtY	120754057	0.55778	0.138747	outcome	TRUE	reported	textfile	345727	0.0414018	7.71355e-17	8172	exposure	TRUE	reported	ZIy9kb	textfile	2	1	TRUE	0.00843070325852916	69.464480040412	174.03010295952	NA	NA	0.00843274967450184	8172	9.93737914695928e-07	345727	TRUE	4.03197084198139e-16
rs1136293	A	G	A	G	-0.221115	-0.102722	0.0711035	0.126794	FALSE	FALSE	FALSE	PspFtY	121191316	0.242648	0.0879175	outcome	TRUE	reported	textfile	345727	0.0293909	5.34246e-14	8172	exposure	TRUE	reported	ZIy9kb	textfile	2	1	TRUE	0.00687835725214302	56.5853933003815	174.03010295952	NA	NA	0.00688002947587656	8172	3.94860574175664e-06	345727	TRUE	4.18681329776599e-13
rs113715693	T	C	T	C	0.849414	-0.0479794	0.146716	0.158673	FALSE	FALSE	FALSE	PspFtY	120668184	0.548112	0.0798869	outcome	TRUE	reported	textfile	345727	0.0195725	1e-200	8172	exposure	TRUE	reported	ZIy9kb	textfile	2	1	TRUE	0.187303627810481	1882.95492828258	174.03010295952	NA	NA	0.187340889499482	8172	1.04334334299234e-06	345727	TRUE	0
rs11609125	A	G	A	G	-0.383669	0.456184	0.0221754	0.00883173	FALSE	FALSE	FALSE	PspFtY	120624668	0.132743	0.303441	outcome	TRUE	reported	textfile	345727	0.0511259	6.17134e-14	8172	exposure	TRUE	reported	ZIy9kb	textfile	2	1	TRUE	0.00684416589757778	56.3021768217735	174.03010295952	NA	NA	0.0068458298662197	8172	6.5372930187295e-06	345727	TRUE	6.97521692824821e-13
rs11610853	A	T	A	T	0.12246	0.0188139	0.332137	0.318582	FALSE	TRUE	FALSE	PspFtY	121279183	0.762509	0.062259	outcome	TRUE	reported	textfile	345727	0.0162559	4.94689e-14	8172	exposure	TRUE	reported	ZIy9kb	textfile	2	1	TRUE	0.0068965612862473	56.7361903223467	174.03010295952	NA	NA	0.00689823790489253	8172	2.64132888691315e-07	345727	TRUE	1.45892038639404e-13
rs11611541	T	C	T	C	-0.226138	-0.0538687	0.15779	0.187884	FALSE	FALSE	FALSE	PspFtY	120262686	0.468516	0.0743123	outcome	TRUE	reported	textfile	345727	0.0208077	1.63842e-27	8172	exposure	TRUE	reported	ZIy9kb	textfile	2	1	TRUE	0.0142474935955199	118.084429833176	174.03010295952	NA	NA	0.0142509316502416	8172	1.51991792996214e-06	345727	TRUE	2.81488040698344e-26
rs11615992	G	A	G	A	0.166303	-0.0686052	0.167245	0.0985133	FALSE	FALSE	FALSE	PspFtY	121189465	0.483522	0.0979165	outcome	TRUE	reported	textfile	345727	0.0203347	2.87917e-16	8172	exposure	TRUE	reported	ZIy9kb	textfile	2	1	TRUE	0.0081181340924211	66.8679989167787	174.03010295952	NA	NA	0.0081201052586363	8172	1.41994297958022e-06	345727	TRUE	1.64675485710646e-15
rs1167362	G	A	G	A	0.13241	-0.0597992	0.242604	0.314164	FALSE	FALSE	FALSE	PspFtY	120398490	0.340331	0.0627148	outcome	TRUE	reported	textfile	345727	0.018337	5.16251e-13	8172	exposure	TRUE	reported	ZIy9kb	textfile	2	1	TRUE	0.00634007532728197	52.1289166823896	174.03010295952	NA	NA	0.00634161752287425	8172	2.6297758774263e-06	345727	TRUE	2.86448299992926e-12
rs117468623	C	T	C	T	0.484004	-0.291718	0.0184346	0.0167374	FALSE	FALSE	FALSE	PspFtY	120250769	0.224216	0.240019	outcome	TRUE	reported	textfile	345727	0.0561836	7.01364e-18	8172	exposure	TRUE	reported	ZIy9kb	textfile	2	1	TRUE	0.00899962134829947	74.1946299916083	174.03010295952	NA	NA	0.00900180460619797	8172	4.27270166491935e-06	345727	TRUE	9.04756739519471e-17
rs117637925	C	G	C	G	0.309632	0.134915	0.0305456	0.0319288	FALSE	TRUE	FALSE	PspFtY	120164040	0.42391	0.168717	outcome	TRUE	reported	textfile	345727	0.0438278	1.60915e-12	8172	exposure	TRUE	reported	ZIy9kb	textfile	2	1	TRUE	0.00607043182777176	49.8983324584035	174.03010295952	NA	NA	0.00607190883455734	8172	1.849571811261e-06	345727	TRUE	7.19560255231885e-12
rs117816983	G	A	G	A	0.757525	-0.00821297	0.0310073	0.0440722	FALSE	FALSE	FALSE	PspFtY	120900416	0.954154	0.142857	outcome	TRUE	reported	textfile	345727	0.0432418	1.03748e-68	8172	exposure	TRUE	reported	ZIy9kb	textfile	2	1	TRUE	0.0361948914568937	306.817488911033	174.03010295952	NA	NA	0.0362034311171623	8172	9.56019238879908e-09	345727	TRUE	2.72105883891756e-66
rs1179368	C	T	C	T	0.215525	-0.152277	0.0520526	0.0409738	FALSE	FALSE	FALSE	PspFtY	120296902	0.296907	0.145987	outcome	TRUE	reported	textfile	345727	0.0342238	3.02433e-10	8172	exposure	TRUE	reported	ZIy9kb	textfile	2	1	TRUE	0.0048295643452141	39.649028233478	174.03010295952	NA	NA	0.0048307409018778	8172	3.14708232880924e-06	345727	TRUE	1.35676102204243e-09
rs1186055	A	C	A	C	-0.148825	-0.00720317	0.259686	0.354518	FALSE	FALSE	FALSE	PspFtY	121162726	0.906004	0.0610019	outcome	TRUE	reported	textfile	345727	0.0174946	1.78658e-17	8172	exposure	TRUE	reported	ZIy9kb	textfile	2	1	TRUE	0.00877781460649137	72.3498	174.03010295952	NA	NA	0.00877994453204367	8172	4.03301467511198e-08	345727	TRUE	5.4139027644209e-17
rs12080335	C	T	C	T	0.190796	0.120833	0.111358	0.10157	FALSE	FALSE	FALSE	PspFtY	219286645	0.208393	0.0960522	outcome	TRUE	reported	textfile	345727	0.0240265	2.00443e-15	8172	exposure	TRUE	reported	ZIy9kb	textfile	2	1	TRUE	0.00765756540563275	63.0450811967874	174.03010295952	NA	NA	0.0076594256046176	8172	4.57745106325666e-06	345727	TRUE	2.05391982817535e-14
rs139809010	A	C	A	C	0.550873	0.177389	0.0149586	0.00796438	FALSE	FALSE	FALSE	PspFtY	120306349	0.59569	0.334312	outcome	TRUE	reported	textfile	345727	0.0622709	9.03984e-19	8172	exposure	TRUE	reported	ZIy9kb	textfile	2	1	TRUE	0.00948560686112059	78.239557741075	174.03010295952	NA	NA	0.0094879068876338	8172	8.14363500601629e-07	345727	TRUE	5.21132349762655e-18
rs139868663	T	C	T	C	0.721426	-0.569838	0.0134216	0.00237084	FALSE	FALSE	FALSE	PspFtY	121021548	0.366117	0.630512	outcome	TRUE	reported	textfile	345727	0.066329	1.49213e-27	8172	exposure	TRUE	reported	ZIy9kb	textfile	2	1	TRUE	0.0142694274979342	118.268851459285	174.03010295952	NA	NA	0.0142728707688775	8172	2.3625678496429e-06	345727	TRUE	3.44328035964856e-26
rs142035563	A	T	A	T	-0.376577	0.293178	0.0157727	0.00507011	FALSE	TRUE	FALSE	PspFtY	120792480	0.471112	0.406812	outcome	TRUE	reported	textfile	345727	0.0609069	6.29619e-10	8172	exposure	TRUE	reported	ZIy9kb	textfile	2	1	TRUE	0.00465606898381158	38.2180293789543	174.03010295952	NA	NA	0.0046572034721159	8172	1.50225551746766e-06	345727	TRUE	2.01700902252259e-09
rs143580996	A	C	A	C	0.450661	-0.0183255	0.0549919	0.0230101	FALSE	FALSE	FALSE	PspFtY	120423195	0.923996	0.192089	outcome	TRUE	reported	textfile	345727	0.033257	7.82945e-42	8172	exposure	TRUE	reported	ZIy9kb	textfile	2	1	TRUE	0.0219763127292016	183.580906407907	174.03010295952	NA	NA	0.0219815742319628	8172	2.63254544983048e-08	345727	TRUE	1.57900170425129e-40
rs145483500	A	G	A	G	0.50559	-0.0370716	0.0171777	0.0257474	FALSE	FALSE	FALSE	PspFtY	120806733	0.835817	0.178877	outcome	TRUE	reported	textfile	345727	0.0584463	5.12688e-18	8172	exposure	TRUE	reported	ZIy9kb	textfile	2	1	TRUE	0.00907393780247526	74.8129196257283	174.03010295952	NA	NA	0.00907613892401318	8172	1.24234671654526e-07	345727	TRUE	1.81481782358732e-17
rs147023777	A	G	A	G	0.290665	-0.145348	0.0220859	0.0230318	FALSE	FALSE	FALSE	PspFtY	76193480	0.450655	0.192687	outcome	TRUE	reported	textfile	345727	0.0513468	1.50661e-08	8172	exposure	TRUE	reported	ZIy9kb	textfile	2	1	TRUE	0.00390598603537579	32.0370421482661	174.03010295952	NA	NA	0.00390693847738025	8172	1.64581793294431e-06	345727	TRUE	4.33808309341052e-08
rs148734759	A	T	A	T	0.685395	-1.13774	0.00597806	0.000435485	FALSE	TRUE	FALSE	PspFtY	120810305	0.366967	1.26111	outcome	TRUE	reported	textfile	345727	0.0988783	4.15802e-12	8172	exposure	TRUE	reported	ZIy9kb	textfile	2	1	TRUE	0.00584528244856501	48.0367459527801	174.03010295952	NA	NA	0.00584670499613085	8172	2.354226844004e-06	345727	TRUE	1.9860155558261e-11
rs150084731	T	C	T	C	0.679223	-0.0704537	0.00546213	0.0482305	FALSE	FALSE	FALSE	PspFtY	120670550	0.618654	0.141542	outcome	TRUE	reported	textfile	345727	0.102044	2.80992e-11	8172	exposure	TRUE	reported	ZIy9kb	textfile	2	1	TRUE	0.00539229051794544	44.2938588868932	174.03010295952	NA	NA	0.00539360342042802	8172	7.16647943865358e-07	345727	TRUE	8.19662855114153e-11
rs1671761	A	G	A	G	0.0870246	-0.035059	0.618114	0.559815	FALSE	FALSE	FALSE	PspFtY	120412786	0.546606	0.058155	outcome	TRUE	reported	textfile	345727	0.0157359	3.19619e-08	8172	exposure	TRUE	reported	ZIy9kb	textfile	2	1	TRUE	0.00372863769916681	30.5769804843535	174.03010295952	NA	NA	0.00372954705818013	8172	1.05122017396988e-06	345727	TRUE	7.83927811788192e-08
rs1800556	T	C	T	C	0.394975	-0.105679	0.0438833	0.06157	FALSE	FALSE	FALSE	PspFtY	120737875	0.379783	0.120323	outcome	TRUE	reported	textfile	345727	0.0371626	2.20119e-26	8172	exposure	TRUE	reported	ZIy9kb	textfile	2	1	TRUE	0.0136344174184132	112.932965500367	174.03010295952	NA	NA	0.0136377095788033	8172	2.23125050942068e-06	345727	TRUE	4.32846682445056e-25
rs186476940	A	G	A	G	0.420183	0.0118993	0.0124381	0.00202562	FALSE	FALSE	FALSE	PspFtY	120158797	0.985585	0.658589	outcome	TRUE	reported	textfile	345727	0.0688379	1.03481e-09	8172	exposure	TRUE	reported	ZIy9kb	textfile	2	1	TRUE	0.0045385572079302	37.2490694213005	174.03010295952	NA	NA	0.00453966319414485	8172	9.44241527622525e-10	345727	TRUE	1.68694398471402e-09
rs186730517	A	G	A	G	0.380515	-0.0163533	0.0125526	0.00203778	FALSE	FALSE	FALSE	PspFtY	121244358	0.979889	0.64874	outcome	TRUE	reported	textfile	345727	0.0681947	2.40757e-08	8172	exposure	TRUE	reported	ZIy9kb	textfile	2	1	TRUE	0.00379544307839257	31.1269103669713	174.03010295952	NA	NA	0.00379636866815443	8172	1.83797105965943e-09	345727	TRUE	3.64188451227886e-08
rs208294	C	T	C	T	-0.144169	0.0817308	0.552457	0.612955	FALSE	FALSE	FALSE	PspFtY	121162450	0.1717	0.0597989	outcome	TRUE	reported	textfile	345727	0.0151823	2.1833e-21	8172	exposure	TRUE	reported	ZIy9kb	textfile	2	1	TRUE	0.0109137609333194	90.1492946756165	174.03010295952	NA	NA	0.0109164034356244	8172	5.40321162280353e-06	345727	TRUE	5.17935027261964e-20
rs34737694	T	C	T	C	0.743427	-0.0380741	0.17131	0.169441	FALSE	FALSE	FALSE	PspFtY	120607251	0.622664	0.0773742	outcome	TRUE	reported	textfile	345727	0.0186286	1e-200	8172	exposure	TRUE	reported	ZIy9kb	textfile	2	1	TRUE	0.163102348980282	1592.24510852105	174.03010295952	NA	NA	0.16313576257218	8172	7.00383424752531e-07	345727	TRUE	0
rs35933842	T	G	T	G	0.461715	-0.423295	0.0104154	0.00227021	FALSE	FALSE	FALSE	PspFtY	121133096	0.457026	0.569134	outcome	TRUE	reported	textfile	345727	0.0746254	6.12769e-10	8172	exposure	TRUE	reported	ZIy9kb	textfile	2	1	TRUE	0.00466247636132504	38.2708688935692	174.03010295952	NA	NA	0.00466361240352301	8172	1.60002119183934e-06	345727	TRUE	2.00825980462032e-09
rs3999413	A	G	A	G	0.486478	-0.0774848	0.190678	0.188849	FALSE	FALSE	FALSE	PspFtY	121000135	0.293962	0.0738324	outcome	TRUE	reported	textfile	345727	0.0187658	3.60693e-148	8172	exposure	TRUE	reported	ZIy9kb	textfile	2	1	TRUE	0.0759874312943622	671.871070481848	174.03010295952	NA	NA	0.0760046190631566	8172	3.18571479344049e-06	345727	TRUE	2.80053934510951e-139
rs4767925	G	A	G	A	-0.291411	-0.00821425	0.110774	0.111951	FALSE	FALSE	FALSE	PspFtY	120648146	0.928156	0.0911028	outcome	TRUE	reported	textfile	345727	0.0241311	1.41211e-33	8172	exposure	TRUE	reported	ZIy9kb	textfile	2	1	TRUE	0.0175326440134467	145.797924701551	174.03010295952	NA	NA	0.0175368607029149	8172	2.35148161376008e-08	345727	TRUE	1.39427528831448e-32
rs4767938	T	C	T	C	0.349456	0.00135622	0.63452	0.628817	FALSE	FALSE	FALSE	PspFtY	120823359	0.981998	0.0601041	outcome	TRUE	reported	textfile	345727	0.0152485	3.12018e-116	8172	exposure	TRUE	reported	ZIy9kb	textfile	2	1	TRUE	0.0603880398642	525.078762959986	174.03010295952	NA	NA	0.0604019298239841	8172	1.47272380371784e-09	345727	TRUE	3.10044383720975e-111
rs514108	T	C	T	C	0.335146	0.0691193	0.840211	0.824719	FALSE	FALSE	FALSE	PspFtY	120774664	0.370238	0.0771396	outcome	TRUE	reported	textfile	345727	0.0205648	1.03572e-59	8172	exposure	TRUE	reported	ZIy9kb	textfile	2	1	TRUE	0.0314775157420002	265.529513038785	174.03010295952	NA	NA	0.0314849787644793	8172	2.32226674709882e-06	345727	TRUE	8.08310250466982e-57
rs55647329	T	C	T	C	-0.384688	0.073791	0.132353	0.147462	FALSE	FALSE	FALSE	PspFtY	120718163	0.362831	0.0810904	outcome	TRUE	reported	textfile	345727	0.0222023	2.96879e-67	8172	exposure	TRUE	reported	ZIy9kb	textfile	2	1	TRUE	0.035434374261354	300.133894460078	174.03010295952	NA	NA	0.0354427410870355	8172	2.39516855172683e-06	345727	TRUE	6.014701341479e-64
rs568058	A	G	A	G	-0.228354	0.25268	0.0467648	0.0481	FALSE	FALSE	FALSE	PspFtY	120566657	0.0641239	0.136487	outcome	TRUE	reported	textfile	345727	0.0359603	2.15075e-10	8172	exposure	TRUE	reported	ZIy9kb	textfile	2	1	TRUE	0.00491026040603361	40.3147836029982	174.03010295952	NA	NA	0.00491145652448539	8172	9.91343286229027e-06	345727	TRUE	2.10302533280675e-09
rs61948179	A	C	A	C	-0.402611	-0.00580729	0.0312385	0.0277432	FALSE	FALSE	FALSE	PspFtY	120756717	0.974419	0.1811	outcome	TRUE	reported	textfile	345727	0.0436673	2.97247e-20	8172	exposure	TRUE	reported	ZIy9kb	textfile	2	1	TRUE	0.0102952263665972	84.9869594003342	174.03010295952	NA	NA	0.0102977206650063	8172	2.97426281079992e-09	345727	TRUE	9.74373698920581e-20
rs6490295	T	G	T	G	-0.356464	0.0977011	0.370712	0.339471	FALSE	FALSE	FALSE	PspFtY	120603241	0.113497	0.0617318	outcome	TRUE	reported	textfile	345727	0.0160238	1.23761e-109	8172	exposure	TRUE	reported	ZIy9kb	textfile	2	1	TRUE	0.0571001847687843	494.759360459278	174.03010295952	NA	NA	0.0571133644508176	8172	7.24514520665016e-06	345727	TRUE	8.20070372381832e-103
rs649622	T	G	T	G	-0.352156	0.140509	0.112589	0.0822751	FALSE	FALSE	FALSE	PspFtY	120745084	0.187144	0.106521	outcome	TRUE	reported	textfile	345727	0.0237636	1.10141e-49	8172	exposure	TRUE	reported	ZIy9kb	textfile	2	1	TRUE	0.0261698114128525	219.553020381511	174.03010295952	NA	NA	0.02617605003932	8172	5.03274406227093e-06	345727	TRUE	6.81410706363957e-47
rs7138861	C	T	C	T	-0.319258	0.0230016	0.350801	0.298383	FALSE	FALSE	FALSE	PspFtY	120618269	0.717343	0.0635384	outcome	TRUE	reported	textfile	345727	0.015781	5.27139e-91	8172	exposure	TRUE	reported	ZIy9kb	textfile	2	1	TRUE	0.0476938904981963	409.174194602314	174.03010295952	NA	NA	0.0477050088955103	8172	3.79064046878795e-07	345727	TRUE	4.77640470260015e-87
rs71454675	G	C	G	C	0.408211	-0.282134	0.0553122	0.0328634	FALSE	TRUE	FALSE	PspFtY	121089921	0.08124	0.161818	outcome	TRUE	reported	textfile	345727	0.033187	9.02174e-35	8172	exposure	TRUE	reported	ZIy9kb	textfile	2	1	TRUE	0.0181776596641684	151.261051368477	174.03010295952	NA	NA	0.0181820286122556	8172	8.79270677126567e-06	345727	TRUE	2.03496740080042e-32
rs72817412	T	C	T	C	0.324498	-0.0400609	0.0430811	0.0638834	FALSE	FALSE	FALSE	PspFtY	89075082	0.735064	0.118385	outcome	TRUE	reported	textfile	345727	0.0375085	5.09067e-18	8172	exposure	TRUE	reported	ZIy9kb	textfile	2	1	TRUE	0.00907563051331238	74.8270035302208	174.03010295952	NA	NA	0.0090778320417001	8172	3.31220430696746e-07	345727	TRUE	2.13966825458462e-17
rs7304551	C	T	C	T	-0.129832	0.00984521	0.179848	0.175411	FALSE	FALSE	FALSE	PspFtY	120419726	0.897684	0.076564	outcome	TRUE	reported	textfile	345727	0.0199607	7.80177e-11	8172	exposure	TRUE	reported	ZIy9kb	textfile	2	1	TRUE	0.0051504008488437	42.2966194799257	174.03010295952	NA	NA	0.00515165516163678	8172	4.78266468185926e-08	345727	TRUE	1.51947995312767e-10
rs73214163	T	C	T	C	-0.254357	0.317968	0.0430811	0.0257617	FALSE	FALSE	FALSE	PspFtY	121032704	0.087583	0.186133	outcome	TRUE	reported	textfile	345727	0.0375179	1.20511e-11	8172	exposure	TRUE	reported	ZIy9kb	textfile	2	1	TRUE	0.00559301716913694	45.9519603751827	174.03010295952	NA	NA	0.00559437866918913	8172	8.44083916192298e-06	345727	TRUE	1.23722433556948e-10
rs73215378	A	C	A	C	0.257694	0.214494	0.0282318	0.0243906	FALSE	FALSE	FALSE	PspFtY	119764152	0.259059	0.190049	outcome	TRUE	reported	textfile	345727	0.0459727	2.07822e-08	8172	exposure	TRUE	reported	ZIy9kb	textfile	2	1	TRUE	0.00383013106465879	31.4124847318519	174.03010295952	NA	NA	0.00383106508120304	8172	3.68439965990919e-06	345727	TRUE	8.09761602371644e-08
rs73217401	C	A	C	A	0.378998	-0.243137	0.0131757	0.0280673	FALSE	FALSE	FALSE	PspFtY	120164147	0.166949	0.175922	outcome	TRUE	reported	textfile	345727	0.065869	8.72545e-09	8172	exposure	TRUE	reported	ZIy9kb	textfile	2	1	TRUE	0.00403485079798286	33.098277631433	174.03010295952	NA	NA	0.00403583453526751	8172	5.52495334847563e-06	345727	TRUE	4.42838774289664e-08
rs73229142	C	T	C	T	-0.365045	0.0122944	0.0470844	0.0322256	FALSE	FALSE	FALSE	PspFtY	120819287	0.941395	0.167232	outcome	TRUE	reported	textfile	345727	0.0356176	1.19584e-24	8172	exposure	TRUE	reported	ZIy9kb	textfile	2	1	TRUE	0.0126907806710808	105.016418415707	174.03010295952	NA	NA	0.0126938479136344	8172	1.56331004406759e-08	345727	TRUE	5.7158837438867e-24
rs73419638	G	A	G	A	-0.365525	0.0567522	0.293584	0.265837	FALSE	FALSE	FALSE	PspFtY	121048096	0.386347	0.065514	outcome	TRUE	reported	textfile	345727	0.0163789	2.53368e-110	8172	exposure	TRUE	reported	ZIy9kb	textfile	2	1	TRUE	0.05744385534143	497.918665958608	174.03010295952	NA	NA	0.0574571095146134	8172	2.17052824942191e-06	345727	TRUE	1.77631737597817e-104
rs7484571	A	T	A	T	0.185704	0.0327235	0.0653599	0.0700262	FALSE	TRUE	FALSE	PspFtY	120322582	0.773717	0.113815	outcome	TRUE	reported	textfile	345727	0.0304666	1.09217e-09	8172	exposure	TRUE	reported	ZIy9kb	textfile	2	1	TRUE	0.00452580859065351	37.1439626508955	174.03010295952	NA	NA	0.00452691148432689	8172	2.3910551971185e-07	345727	TRUE	2.28736197383732e-09
rs75029160	C	T	C	T	0.357533	-0.585501	0.0169261	0.0133506	FALSE	FALSE	FALSE	PspFtY	121704445	0.0213826	0.254437	outcome	TRUE	reported	textfile	345727	0.0586545	1.09044e-09	8172	exposure	TRUE	reported	ZIy9kb	textfile	2	1	TRUE	0.00452617227894227	37.1469610643748	174.03010295952	NA	NA	0.00452727526083974	8172	1.53164216116274e-05	345727	TRUE	1.42573498399479e-08
rs75475789	T	C	T	C	-0.317062	-0.0598826	0.0219503	0.0281367	FALSE	FALSE	FALSE	PspFtY	121108326	0.730789	0.174039	outcome	TRUE	reported	textfile	345727	0.0521257	1.18214e-09	8172	exposure	TRUE	reported	ZIy9kb	textfile	2	1	TRUE	0.00450707111597962	36.9894852581555	174.03010295952	NA	NA	0.00450816946419886	8172	3.4243425657911e-07	345727	TRUE	2.602992781011e-09
rs76102919	C	T	C	T	0.663277	-0.162305	0.0162186	0.0281992	FALSE	FALSE	FALSE	PspFtY	121027091	0.353294	0.174856	outcome	TRUE	reported	textfile	345727	0.0599393	1.83799e-28	8172	exposure	TRUE	reported	ZIy9kb	textfile	2	1	TRUE	0.014763143263201	122.422217191347	174.03010295952	NA	NA	0.0147667038850611	8172	2.4921309103489e-06	345727	TRUE	4.84751820642441e-27
rs76614912	C	T	C	T	-0.367752	-0.221806	0.0155709	0.0147453	FALSE	FALSE	FALSE	PspFtY	120619135	0.350754	0.237702	outcome	TRUE	reported	textfile	345727	0.0612477	1.92124e-09	8172	exposure	TRUE	reported	ZIy9kb	textfile	2	1	TRUE	0.00439228399989162	36.043272568521	174.03010295952	NA	NA	0.00439335449857931	8172	2.51854102212514e-06	345727	TRUE	7.11679121117796e-09
rs77254471	T	C	T	C	0.635356	0.368617	0.0126818	0.011457	FALSE	FALSE	FALSE	PspFtY	120947275	0.173689	0.270953	outcome	TRUE	reported	textfile	345727	0.0681458	1.1259e-20	8172	exposure	TRUE	reported	ZIy9kb	textfile	2	1	TRUE	0.010525250490089	86.9060039648497	174.03010295952	NA	NA	0.0105277999252808	8172	5.35339985112942e-06	345727	TRUE	2.43385642898395e-19
rs8182228	T	C	T	C	-0.141427	0.0560648	0.137714	0.129473	FALSE	FALSE	FALSE	PspFtY	89114287	0.515682	0.0862514	outcome	TRUE	reported	textfile	345727	0.0221992	1.88018e-10	8172	exposure	TRUE	reported	ZIy9kb	textfile	2	1	TRUE	0.00494208273807152	40.5773526039047	174.03010295952	NA	NA	0.00494328656979902	8172	1.22212866951861e-06	345727	TRUE	5.9213087986212e-10
Glycine levels
SNP	effect_allele.exposure	other_allele.exposure	effect_allele.outcome	other_allele.outcome	beta.exposure	beta.outcome	eaf.exposure	eaf.outcome	remove	palindromic	ambiguous	id.outcome	pos.outcome	pval.outcome	se.outcome	outcome	mr_keep.outcome	pval_origin.outcome	data_source.outcome	samplesize.outcome	se.exposure	pval.exposure	samplesize.exposure	exposure	mr_keep.exposure	pval_origin.exposure	id.exposure	data_source.exposure	action	SNP_index	mr_keep	R2	f	meanf	units.outcome	units.exposure	rsq.exposure	effective_n.exposure	rsq.outcome	effective_n.outcome	steiger_dir	steiger_pval
rs1047891	A	C	A	C	0.574475	0.0496331	0.308122	0.32337	FALSE	FALSE	FALSE	cNGq2h	210675783	0.425271	0.0622507	outcome	TRUE	reported	textfile	345727	0.0149118	1e-200	8262	exposure	TRUE	reported	g7pW1e	textfile	2	1	TRUE	0.152281931457213	1483.80552510672	113.554573935463	NA	NA	0.152313187482657	8262	1.83875023014009e-06	345727	TRUE	6.21092395515586e-298
rs10932363	A	C	A	C	-0.201993	-0.17673	0.23449	0.224178	FALSE	FALSE	FALSE	cNGq2h	210808770	0.0110782	0.0695726	outcome	TRUE	reported	textfile	345727	0.017348	2.47463e-31	8262	exposure	TRUE	reported	g7pW1e	textfile	2	1	TRUE	0.0161443295520752	135.540370509253	113.554573935463	NA	NA	0.0161481754668659	8262	1.86640202277848e-05	345727	TRUE	1.45064228634638e-28
rs112085022	T	C	T	C	0.224774	-0.0841614	0.0354755	0.0265842	FALSE	FALSE	FALSE	cNGq2h	210635141	0.646035	0.183247	outcome	TRUE	reported	textfile	345727	0.0403377	2.51384e-08	8262	exposure	TRUE	reported	g7pW1e	textfile	2	1	TRUE	0.00374417009467357	31.0430755370763	113.554573935463	NA	NA	0.00374507327818526	8262	6.10128209773518e-07	345727	TRUE	5.54188066661019e-08
rs113203861	T	C	T	C	-0.139379	0.00721943	0.0980368	0.141733	FALSE	FALSE	FALSE	cNGq2h	210451289	0.931396	0.0838608	outcome	TRUE	reported	textfile	345727	0.0252016	3.19196e-08	8262	exposure	TRUE	reported	g7pW1e	textfile	2	1	TRUE	0.00368848836519378	30.5797067892036	113.554573935463	NA	NA	0.00368937816667967	8262	2.14366552136062e-08	345727	TRUE	5.07067351042552e-08
rs114102226	G	A	G	A	-0.235042	-0.20207	0.0345287	0.051499	FALSE	FALSE	FALSE	cNGq2h	210792446	0.119189	0.129683	outcome	TRUE	reported	textfile	345727	0.0405392	6.71546e-09	8262	exposure	TRUE	reported	g7pW1e	textfile	2	1	TRUE	0.00405221034694175	33.6074418894978	113.554573935463	NA	NA	0.00405318753483001	8262	7.0226940828935e-06	345727	TRUE	4.07374166819831e-08
rs114338044	G	A	G	A	0.311152	0.084602	0.0205355	0.0336144	FALSE	FALSE	FALSE	cNGq2h	210750397	0.6033	0.162802	outcome	TRUE	reported	textfile	345727	0.0526911	3.52196e-09	8262	exposure	TRUE	reported	g7pW1e	textfile	2	1	TRUE	0.00420297008934206	34.8630613420088	113.554573935463	NA	NA	0.00420398347938383	8262	7.81107240727912e-07	345727	TRUE	8.81489511643446e-09
rs116012745	T	C	T	C	-0.148991	-0.0394873	0.0907102	0.071485	FALSE	FALSE	FALSE	cNGq2h	210506225	0.726678	0.112967	outcome	TRUE	reported	textfile	345727	0.0261557	1.22429e-08	8262	exposure	TRUE	reported	g7pW1e	textfile	2	1	TRUE	0.00391200939050385	32.440103555299	113.554573935463	NA	NA	0.00391295290185542	8262	3.53411557935351e-07	345727	TRUE	2.51752397824975e-08
rs116224031	T	G	T	G	0.39945	0.0307026	0.0127257	0.0198142	FALSE	FALSE	FALSE	cNGq2h	210824904	0.886868	0.215807	outcome	TRUE	reported	textfile	345727	0.0662828	1.67611e-09	8262	exposure	TRUE	reported	g7pW1e	textfile	2	1	TRUE	0.00437656194624199	36.3093116275221	113.554573935463	NA	NA	0.00437761700750936	8262	5.8544815724616e-08	345727	TRUE	3.04257056531205e-09
rs12328639	G	A	G	A	-0.222063	-0.102877	0.152007	0.0789816	FALSE	FALSE	FALSE	cNGq2h	210811599	0.339591	0.107728	outcome	TRUE	reported	textfile	345727	0.020771	1.12127e-26	8262	exposure	TRUE	reported	g7pW1e	textfile	2	1	TRUE	0.0136453754099162	114.270058735466	113.554573935463	NA	NA	0.0136486342802966	8262	2.63783397385225e-06	345727	TRUE	2.61744596741555e-25
rs13009600	A	G	A	G	0.217003	-0.000739342	0.365234	0.372556	FALSE	FALSE	FALSE	cNGq2h	210907900	0.990159	0.059943	outcome	TRUE	reported	textfile	345727	0.0153622	2.63482e-45	8262	exposure	TRUE	reported	g7pW1e	textfile	2	1	TRUE	0.0235817135528405	199.489252352305	113.554573935463	NA	NA	0.0235872887307743	8262	4.40030744665419e-10	345727	TRUE	6.18665894493126e-44
rs13011429	C	G	C	G	-0.163508	0.0673668	0.142128	0.136565	FALSE	TRUE	FALSE	cNGq2h	210730607	0.420316	0.0835948	outcome	TRUE	reported	textfile	345727	0.0215386	3.16442e-14	8262	exposure	TRUE	reported	g7pW1e	textfile	2	1	TRUE	0.0069269028554712	57.6153132641605	113.554573935463	NA	NA	0.0069285684509518	8262	1.87845895269863e-06	345727	TRUE	1.70542331777973e-13
rs13241866	G	C	G	C	0.0945722	0.0506606	0.753909	0.809514	FALSE	TRUE	FALSE	cNGq2h	56023185	0.489843	0.0733617	outcome	TRUE	reported	textfile	345727	0.0173335	4.86894e-08	8262	exposure	TRUE	reported	g7pW1e	textfile	2	1	TRUE	0.00359010619315276	29.7611227465293	113.554573935463	NA	NA	0.00359097234671719	8262	1.37933736351607e-06	345727	TRUE	1.27105577643018e-07
rs140369375	A	C	A	C	0.414118	0.120328	0.0135827	0.0131766	FALSE	FALSE	FALSE	cNGq2h	210655834	0.644233	0.260569	outcome	TRUE	reported	textfile	345727	0.0643765	1.25314e-10	8262	exposure	TRUE	reported	g7pW1e	textfile	2	1	TRUE	0.0049835470674871	41.3702694625045	113.554573935463	NA	NA	0.00498474772253374	8262	6.16817732966336e-07	345727	TRUE	3.36299391468005e-10
rs143955150	A	G	A	G	0.360456	-0.0285361	0.0281638	0.0693869	FALSE	FALSE	FALSE	cNGq2h	210787603	0.810312	0.118889	outcome	TRUE	reported	textfile	345727	0.0451353	1.3924e-15	8262	exposure	TRUE	reported	g7pW1e	textfile	2	1	TRUE	0.00766032185455527	63.7627013331544	113.554573935463	NA	NA	0.00766216244226087	8262	1.66638378336841e-07	345727	TRUE	4.32450535590413e-15
rs145024038	TG	T	TG	T	0.092548	0.00484592	0.307051	0.2609	FALSE	FALSE	FALSE	cNGq2h	75729746	0.941372	0.0658895	outcome	TRUE	reported	textfile	345727	0.0159813	6.99554e-09	8262	exposure	TRUE	reported	g7pW1e	textfile	2	1	TRUE	0.00404264327666439	33.5277742965895	113.554573935463	NA	NA	0.00404361816682683	8262	1.56454934269585e-08	345727	TRUE	1.14568955488246e-08
rs1992855	C	T	C	T	0.0849393	-0.0578725	0.424784	0.404632	FALSE	FALSE	FALSE	cNGq2h	126190826	0.327385	0.0590901	outcome	TRUE	reported	textfile	345727	0.0152422	2.50902e-08	8262	exposure	TRUE	reported	g7pW1e	textfile	2	1	TRUE	0.00374461810887376	31.0468040037926	113.554573935463	NA	NA	0.00374552140005091	8262	2.77448925391892e-06	345727	TRUE	8.60927292703951e-08
rs2297442	C	T	C	T	-0.120226	0.0224395	0.291126	0.282533	FALSE	FALSE	FALSE	cNGq2h	6540540	0.72721	0.0643263	outcome	TRUE	reported	textfile	345727	0.016222	1.25071e-13	8262	exposure	TRUE	reported	g7pW1e	textfile	2	1	TRUE	0.00660427423320077	54.9139720972026	113.554573935463	NA	NA	0.00660586276765692	8262	3.5198022903106e-07	345727	TRUE	3.79989073135522e-13
rs2371003	A	C	A	C	0.136601	0.164228	0.125576	0.112183	FALSE	FALSE	FALSE	cNGq2h	210623959	0.0758211	0.0924985	outcome	TRUE	reported	textfile	345727	0.0224197	1.10898e-09	8262	exposure	TRUE	reported	g7pW1e	textfile	2	1	TRUE	0.00447317551810641	37.1144492252011	113.554573935463	NA	NA	0.00447425376541771	8262	9.11780464089401e-06	345727	TRUE	9.17362129138388e-09
rs319714	C	T	C	T	0.161768	0.0947595	0.918869	0.932143	FALSE	FALSE	FALSE	cNGq2h	211039157	0.414899	0.116226	outcome	TRUE	reported	textfile	345727	0.0276275	4.76138e-09	8262	exposure	TRUE	reported	g7pW1e	textfile	2	1	TRUE	0.00413255272318483	34.2765350819007	113.554573935463	NA	NA	0.00413354920517349	8262	1.92268136768227e-06	345727	TRUE	1.53384254409556e-08
rs4441401	T	C	T	C	0.239823	-0.212007	0.953515	0.953741	FALSE	FALSE	FALSE	cNGq2h	210927298	0.133064	0.141138	outcome	TRUE	reported	textfile	345727	0.0349472	6.76907e-12	8262	exposure	TRUE	reported	g7pW1e	textfile	2	1	TRUE	0.00566765321041659	47.0816580283169	113.554573935463	NA	NA	0.00566901774387514	8262	6.52647777720995e-06	345727	TRUE	5.92461803093498e-11
rs62177972	C	A	C	A	0.27481	0.128273	0.0506874	0.0726197	FALSE	FALSE	FALSE	cNGq2h	211008029	0.265254	0.11514	outcome	TRUE	reported	textfile	345727	0.0345756	1.8939e-15	8262	exposure	TRUE	reported	g7pW1e	textfile	2	1	TRUE	0.00758808856754562	63.156851349615	113.554573935463	NA	NA	0.00758991193210824	8262	3.58992775954957e-06	345727	TRUE	1.66453576092918e-14
rs62201970	C	T	C	T	0.352855	0.275468	0.0177163	0.00572898	FALSE	FALSE	FALSE	cNGq2h	210731716	0.45382	0.367751	outcome	TRUE	reported	textfile	345727	0.055782	2.52222e-10	8262	exposure	TRUE	reported	g7pW1e	textfile	2	1	TRUE	0.00481971062562615	40.003615618934	113.554573935463	NA	NA	0.00482087199981927	8262	1.62294236426134e-06	345727	TRUE	8.70286126774448e-10
rs62203749	T	A	T	A	0.465214	0.0741223	0.0258207	0.0106622	FALSE	TRUE	FALSE	cNGq2h	210675259	0.791927	0.280969	outcome	TRUE	reported	textfile	345727	0.0468645	3.18343e-23	8262	exposure	TRUE	reported	g7pW1e	textfile	2	1	TRUE	0.0117864545976579	98.5173	113.554573935463	NA	NA	0.0117892748157803	8262	2.01302926949752e-07	345727	TRUE	1.84448975673179e-22
rs73078181	G	A	G	A	-0.196743	-0.079797	0.151652	0.19753	FALSE	FALSE	FALSE	cNGq2h	210762660	0.276414	0.0733152	outcome	TRUE	reported	textfile	345727	0.020498	8.13705e-22	8262	exposure	TRUE	reported	g7pW1e	textfile	2	1	TRUE	0.0110274387160082	92.1022962214128	113.554573935463	NA	NA	0.0110300793468053	8262	3.42651634387395e-06	345727	TRUE	1.38926362650669e-20
rs74383932	C	G	C	G	0.455203	-0.0109516	0.0274472	0.0196131	FALSE	TRUE	FALSE	cNGq2h	210743282	0.959456	0.215429	outcome	TRUE	reported	textfile	345727	0.0456073	1.84723e-23	8262	exposure	TRUE	reported	g7pW1e	textfile	2	1	TRUE	0.0119138228916169	99.5947310716816	113.554573935463	NA	NA	0.0119166732184346	8262	7.47508312754522e-09	345727	TRUE	7.90002581072206e-23
rs7586705	T	C	T	C	0.19972	0.0524006	0.197914	0.151491	FALSE	FALSE	FALSE	cNGq2h	210792951	0.514913	0.0804669	outcome	TRUE	reported	textfile	345727	0.0185335	4.46163e-27	8262	exposure	TRUE	reported	g7pW1e	textfile	2	1	TRUE	0.0138605785904198	116.097558490481	113.554573935463	NA	NA	0.0138638881345068	8262	1.22661045142668e-06	345727	TRUE	6.64041220699574e-26
rs7607205	G	T	G	T	-0.127798	-0.100888	0.407723	0.437709	FALSE	FALSE	FALSE	cNGq2h	210624379	0.0852177	0.0586154	outcome	TRUE	reported	textfile	345727	0.0151417	3.17085e-17	8262	exposure	TRUE	reported	g7pW1e	textfile	2	1	TRUE	0.00854840647178621	71.2186433688401	113.554573935463	NA	NA	0.00855045860584822	8262	8.56882064422109e-06	345727	TRUE	7.27929248865228e-16
rs79675564	A	C	A	C	0.168803	-0.154816	0.07573	0.0668586	FALSE	FALSE	FALSE	cNGq2h	210422172	0.179469	0.115328	outcome	TRUE	reported	textfile	345727	0.0279683	1.58459e-09	8262	exposure	TRUE	reported	g7pW1e	textfile	2	1	TRUE	0.0043896751650655	36.4185826110758	113.554573935463	NA	NA	0.0043907333736059	8262	5.21229652402542e-06	345727	TRUE	8.66910258538082e-09
Phosphate to mannose ratio
SNP	effect_allele.exposure	other_allele.exposure	effect_allele.outcome	other_allele.outcome	beta.exposure	beta.outcome	eaf.exposure	eaf.outcome	remove	palindromic	ambiguous	id.outcome	pos.outcome	pval.outcome	se.outcome	outcome	mr_keep.outcome	pval_origin.outcome	data_source.outcome	samplesize.outcome	se.exposure	pval.exposure	samplesize.exposure	exposure	mr_keep.exposure	pval_origin.exposure	id.exposure	data_source.exposure	action	SNP_index	mr_keep	R2	f	meanf	units.outcome	units.exposure	rsq.exposure	effective_n.exposure	rsq.outcome	effective_n.outcome	steiger_dir	steiger_pval
rs1260326	C	T	C	T	-0.223397	-0.123553	0.5883	0.650088	FALSE	FALSE	FALSE	WP3WMN	27508073	0.0417359	0.0606798	outcome	TRUE	reported	textfile	345727	0.0151827	5.24517e-49	8206	exposure	TRUE	reported	mkNwGz	textfile	2	1	TRUE	0.0257048849451133	216.446611330726	96.6006145377215	NA	NA	0.0257109902564002	8206	1.19917430818088e-05	345727	TRUE	1.43887665110271e-45
rs58199976	C	T	C	T	-0.11237	-0.031314	0.272899	0.308352	FALSE	FALSE	FALSE	WP3WMN	27711657	0.617332	0.0626739	outcome	TRUE	reported	textfile	345727	0.0170991	4.97411e-11	8206	exposure	TRUE	reported	mkNwGz	textfile	2	1	TRUE	0.00523531843210283	43.176595643982	96.6006145377215	NA	NA	0.00523658803308436	8206	7.22058782849474e-07	345727	TRUE	1.42736665750418e-10
rs76898938	A	G	A	G	0.261363	0.0650409	0.0257317	0.0079293	FALSE	FALSE	FALSE	WP3WMN	27316334	0.832352	0.307251	outcome	TRUE	reported	textfile	345727	0.0475709	3.92527e-08	8206	exposure	TRUE	reported	mkNwGz	textfile	2	1	TRUE	0.00366504516967549	30.1786366384569	96.6006145377215	NA	NA	0.00366593537185758	8206	1.29615109960546e-07	345727	TRUE	6.8809215081152e-08
Glutamine to asparagine ratio
SNP	effect_allele.exposure	other_allele.exposure	effect_allele.outcome	other_allele.outcome	beta.exposure	beta.outcome	eaf.exposure	eaf.outcome	remove	palindromic	ambiguous	id.outcome	pos.outcome	pval.outcome	se.outcome	outcome	mr_keep.outcome	pval_origin.outcome	data_source.outcome	samplesize.outcome	se.exposure	pval.exposure	samplesize.exposure	exposure	mr_keep.exposure	pval_origin.exposure	id.exposure	data_source.exposure	action	SNP_index	mr_keep	R2	f	meanf	units.outcome	units.exposure	rsq.exposure	effective_n.exposure	rsq.outcome	effective_n.outcome	steiger_dir	steiger_pval
rs11622831	T	C	T	C	-0.366773	-0.265219	0.0521781	0.0520767	FALSE	FALSE	FALSE	TtrVBA	104154330	0.0457172	0.132743	outcome	TRUE	reported	textfile	345727	0.0335701	8.69919e-28	8251	exposure	TRUE	reported	WjbTXD	textfile	2	1	TRUE	0.0142608322555377	119.339485662425	139.257641845357	NA	NA	0.0142642405261921	8251	1.15464960029756e-05	345727	TRUE	1.23720775966018e-25
rs117703180	G	C	G	C	-0.405437	0.457116	0.0208461	0.0254597	FALSE	TRUE	FALSE	TtrVBA	103431952	0.0152581	0.188409	outcome	TRUE	reported	textfile	345727	0.0530931	2.23473e-14	8251	exposure	TRUE	reported	WjbTXD	textfile	2	1	TRUE	0.0070178719058052	58.2995642248816	139.257641845357	NA	NA	0.00701956147048518	8251	1.70259509087186e-05	345727	TRUE	7.65598852618203e-13
rs117763903	T	C	T	C	-0.321535	0.0725372	0.0180303	0.0119095	FALSE	FALSE	FALSE	TtrVBA	104220756	0.78916	0.271267	outcome	TRUE	reported	textfile	345727	0.0573537	2.0685e-08	8251	exposure	TRUE	reported	WjbTXD	textfile	2	1	TRUE	0.00379468642893349	31.4216034845907	139.257641845357	NA	NA	0.00379560297234623	8251	2.06822017758922e-07	345727	TRUE	3.88919782965707e-08
rs118182428	T	C	T	C	-0.39614	-0.161389	0.0550231	0.0338549	FALSE	FALSE	FALSE	TtrVBA	103899823	0.31523	0.160697	outcome	TRUE	reported	textfile	345727	0.0331106	5.476e-33	8251	exposure	TRUE	reported	WjbTXD	textfile	2	1	TRUE	0.0170524602542763	143.106054951736	139.257641845357	NA	NA	0.0170565241661575	8251	2.91742883209953e-06	345727	TRUE	2.70458927169265e-31
rs142169554	GGT	G	GGT	G	0.147489	0.0354888	0.28401	0.392677	FALSE	FALSE	FALSE	TtrVBA	103689065	0.549924	0.0593584	outcome	TRUE	reported	textfile	345727	0.0169411	3.14736e-18	8251	exposure	TRUE	reported	WjbTXD	textfile	2	1	TRUE	0.00910244824565227	75.7758412516495	139.257641845357	NA	NA	0.00910463507406204	8251	1.03392020565836e-06	345727	TRUE	1.91143946742411e-17
rs142679999	T	C	T	C	-0.268766	-0.022149	0.0437839	0.0773484	FALSE	FALSE	FALSE	TtrVBA	103677792	0.838783	0.108867	outcome	TRUE	reported	textfile	345727	0.0376075	8.89445e-13	8251	exposure	TRUE	reported	WjbTXD	textfile	2	1	TRUE	0.00615195468865578	51.0616028940559	139.257641845357	NA	NA	0.00615343707416253	8251	1.19725014453716e-07	345727	TRUE	2.15448578854487e-12
rs149784270	T	C	T	C	-0.58264	-0.189415	0.0200959	0.00914211	FALSE	FALSE	FALSE	TtrVBA	104147597	0.540906	0.309784	outcome	TRUE	reported	textfile	345727	0.0539531	3.47924e-27	8251	exposure	TRUE	reported	WjbTXD	textfile	2	1	TRUE	0.0139368912585255	116.590322640007	139.257641845357	NA	NA	0.0139402232037028	8251	1.08138294385483e-06	345727	TRUE	4.89479781270185e-26
rs1557014	G	A	G	A	0.285039	0.019462	0.552072	0.56797	FALSE	FALSE	FALSE	TtrVBA	104144126	0.739421	0.0585115	outcome	TRUE	reported	textfile	345727	0.0149982	1.5557e-80	8251	exposure	TRUE	reported	WjbTXD	textfile	2	1	TRUE	0.0419388884110266	361.097936569812	139.257641845357	NA	NA	0.0419486301032303	8251	3.20008525355521e-07	345727	TRUE	3.47352463498201e-77
rs1557015	C	T	C	T	0.272796	0.125017	0.95153	0.922358	FALSE	FALSE	FALSE	TtrVBA	104144003	0.255754	0.110003	outcome	TRUE	reported	textfile	345727	0.0354225	1.34767e-14	8251	exposure	TRUE	reported	WjbTXD	textfile	2	1	TRUE	0.00713674907250542	59.2942110044884	139.257641845357	NA	NA	0.00713846705132088	8251	3.73591235880238e-06	345727	TRUE	1.10317985840804e-13
rs2282377	G	C	G	C	-0.694939	-0.222815	0.129697	0.121675	FALSE	TRUE	FALSE	TtrVBA	104105483	0.0128393	0.0895487	outcome	TRUE	reported	textfile	345727	0.0213372	1e-200	8251	exposure	TRUE	reported	WjbTXD	textfile	2	1	TRUE	0.113916486806904	1060.5062453807	139.257641845357	NA	NA	0.113940959284301	8251	1.79073662196365e-05	345727	TRUE	4.59011309145584e-213
rs28393117	T	C	T	C	-0.119947	0.04017	0.73882	0.775127	FALSE	FALSE	FALSE	TtrVBA	97866354	0.56581	0.0699543	outcome	TRUE	reported	textfile	345727	0.0174394	6.07327e-12	8251	exposure	TRUE	reported	WjbTXD	textfile	2	1	TRUE	0.00570067470976247	47.294476104672	139.257641845357	NA	NA	0.00570204897796064	8251	9.53769946537322e-07	345727	TRUE	2.04490887416078e-11
rs2933234	C	T	C	T	0.0896366	-0.00708591	0.411261	0.438764	FALSE	FALSE	FALSE	TtrVBA	56536565	0.903983	0.05874	outcome	TRUE	reported	textfile	345727	0.0159769	2.01863e-08	8251	exposure	TRUE	reported	WjbTXD	textfile	2	1	TRUE	0.00380036672172232	31.4688181367061	139.257641845357	NA	NA	0.00380128463188018	8251	4.20913229399011e-08	345727	TRUE	3.34462049126068e-08
rs2933243	A	G	A	G	-0.26321	0.0720221	0.194999	0.184881	FALSE	FALSE	FALSE	TtrVBA	56466793	0.334681	0.0746553	outcome	TRUE	reported	textfile	345727	0.0190115	1.3688e-43	8251	exposure	TRUE	reported	WjbTXD	textfile	2	1	TRUE	0.022703446108889	191.631420582183	139.257641845357	NA	NA	0.0227088256403497	8251	2.6920202106409e-06	345727	TRUE	1.99634691723921e-41
rs3741240	A	G	A	G	-0.103234	-0.0777628	0.353552	0.343442	FALSE	FALSE	FALSE	TtrVBA	62419070	0.20475	0.0613206	outcome	TRUE	reported	textfile	345727	0.016099	1.43173e-10	8251	exposure	TRUE	reported	WjbTXD	textfile	2	1	TRUE	0.0049588635482738	41.1095219194439	139.257641845357	NA	NA	0.00496005987929287	8251	4.65155524119074e-06	345727	TRUE	8.35226090802523e-10
rs61997568	T	C	T	C	-0.402857	-0.189438	0.0303968	0.0393573	FALSE	FALSE	FALSE	TtrVBA	103910480	0.21168	0.151677	outcome	TRUE	reported	textfile	345727	0.0445709	1.58743e-19	8251	exposure	TRUE	reported	WjbTXD	textfile	2	1	TRUE	0.00980423022193994	81.6758640757572	139.257641845357	NA	NA	0.0098065839822054	8251	4.51192627566816e-06	345727	TRUE	2.62048360192149e-18
rs6575976	C	T	C	T	-0.0907	0.060195	0.433266	0.534894	FALSE	FALSE	FALSE	TtrVBA	103356906	0.29958	0.0580285	outcome	TRUE	reported	textfile	345727	0.0158779	1.11442e-08	8251	exposure	TRUE	reported	WjbTXD	textfile	2	1	TRUE	0.00393919710631132	32.6229451410611	139.257641845357	NA	NA	0.003940148415824	8251	3.11247600207868e-06	345727	TRUE	4.18187379606646e-08
rs7104825	T	C	T	C	0.206193	0.0143988	0.117947	0.0695101	FALSE	FALSE	FALSE	TtrVBA	62259361	0.89734	0.111599	outcome	TRUE	reported	textfile	345727	0.0234296	1.36183e-18	8251	exposure	TRUE	reported	WjbTXD	textfile	2	1	TRUE	0.00929937871665965	77.4306318031331	139.257641845357	NA	NA	0.00930161241274407	8251	4.81505427067214e-08	345727	TRUE	4.56998469912209e-18
rs715	C	T	C	T	0.0978414	0.0335986	0.307019	0.313711	FALSE	FALSE	FALSE	TtrVBA	210678331	0.592685	0.062807	outcome	TRUE	reported	textfile	345727	0.0166294	4.01322e-09	8251	exposure	TRUE	reported	WjbTXD	textfile	2	1	TRUE	0.00417798899063811	34.6088264797852	139.257641845357	NA	NA	0.00417899772604462	8251	8.27742241412559e-07	345727	TRUE	1.01252426234706e-08
rs77844682	G	C	G	C	-0.16991	-0.0115049	0.0684957	0.0394019	FALSE	TRUE	FALSE	TtrVBA	103717778	0.93766	0.147101	outcome	TRUE	reported	textfile	345727	0.0302412	1.92607e-08	8251	exposure	TRUE	reported	WjbTXD	textfile	2	1	TRUE	0.00381131510794399	31.559822754699	139.257641845357	NA	NA	0.00381223565236795	8251	1.76930886347364e-08	345727	TRUE	3.07980050772837e-08
Carnitine to ergothioneine ratio
SNP	effect_allele.exposure	other_allele.exposure	effect_allele.outcome	other_allele.outcome	beta.exposure	beta.outcome	eaf.exposure	eaf.outcome	remove	palindromic	ambiguous	id.outcome	pos.outcome	pval.outcome	se.outcome	outcome	mr_keep.outcome	pval_origin.outcome	data_source.outcome	samplesize.outcome	se.exposure	pval.exposure	samplesize.exposure	exposure	mr_keep.exposure	pval_origin.exposure	id.exposure	data_source.exposure	action	SNP_index	mr_keep	R2	f	meanf	units.outcome	units.exposure	rsq.exposure	effective_n.exposure	rsq.outcome	effective_n.outcome	steiger_dir	steiger_pval
rs1171615	T	C	T	C	0.1335	0.0719797	0.771049	0.841298	FALSE	FALSE	FALSE	LahNJ2	59709332	0.360332	0.0786893	outcome	TRUE	reported	textfile	345727	0.0187625	1.1171e-12	8110	exposure	TRUE	reported	9BWRbu	textfile	2	1	TRUE	0.00620379730315423	50.6143899498461	88.4878804940528	NA	NA	0.0062053180976208	8110	2.42023124975023e-06	345727	TRUE	5.69496232836637e-12
rs12210538	G	A	G	A	-0.205876	0.00131238	0.240672	0.161588	FALSE	FALSE	FALSE	LahNJ2	110438805	0.986593	0.0781009	outcome	TRUE	reported	textfile	345727	0.017799	6.07624e-31	8110	exposure	TRUE	reported	9BWRbu	textfile	2	1	TRUE	0.0162290602489767	133.755953933753	88.4878804940528	NA	NA	0.016232998486258	8110	8.16725929775671e-10	345727	TRUE	4.2303854573817e-30
rs273913	C	T	C	T	-0.186668	-0.119968	0.621233	0.49972	FALSE	FALSE	FALSE	LahNJ2	132325463	0.0392971	0.0582065	outcome	TRUE	reported	textfile	345727	0.0158025	3.36335e-32	8110	exposure	TRUE	reported	9BWRbu	textfile	2	1	TRUE	0.0169144778961428	139.502193551211	88.4878804940528	NA	NA	0.0169185796003745	8110	1.22871665380322e-05	345727	TRUE	9.26521039202015e-30
rs62383708	T	G	T	G	-0.116479	-0.184621	0.169342	0.119491	FALSE	FALSE	FALSE	LahNJ2	132558313	0.0413876	0.0905172	outcome	TRUE	reported	textfile	345727	0.0212355	4.1321e-08	8110	exposure	TRUE	reported	9BWRbu	textfile	2	1	TRUE	0.00369607920966816	30.0789845414009	88.4878804940528	NA	NA	0.00369698755077592	8110	1.20327242518432e-05	345727	TRUE	3.23024882007398e-07
Glycine to phosphate ratio
SNP	effect_allele.exposure	other_allele.exposure	effect_allele.outcome	other_allele.outcome	beta.exposure	beta.outcome	eaf.exposure	eaf.outcome	remove	palindromic	ambiguous	id.outcome	pos.outcome	pval.outcome	se.outcome	outcome	mr_keep.outcome	pval_origin.outcome	data_source.outcome	samplesize.outcome	se.exposure	pval.exposure	samplesize.exposure	exposure	mr_keep.exposure	pval_origin.exposure	id.exposure	data_source.exposure	action	SNP_index	mr_keep	R2	f	meanf	units.outcome	units.exposure	rsq.exposure	effective_n.exposure	rsq.outcome	effective_n.outcome	steiger_dir	steiger_pval
rs1047891	A	C	A	C	0.521407	0.0496331	0.308392	0.32337	FALSE	FALSE	FALSE	CuYyr2	210675783	0.425271	0.0622507	outcome	TRUE	reported	textfile	345727	0.0157488	1e-200	8271	exposure	TRUE	reported	Tjjq0S	textfile	2	1	TRUE	0.117017985157819	1095.85665733288	112.151818947473	NA	NA	0.117042975326403	8271	1.83875023014009e-06	345727	TRUE	1.81093596066837e-223
rs10932363	A	C	A	C	-0.178392	-0.17673	0.234232	0.224178	FALSE	FALSE	FALSE	CuYyr2	210808770	0.0110782	0.0695726	outcome	TRUE	reported	textfile	345727	0.0180035	3.81544e-23	8271	exposure	TRUE	reported	Tjjq0S	textfile	2	1	TRUE	0.01173150667629	98.1593862007968	112.151818947473	NA	NA	0.0117343108474183	8271	1.86640202277848e-05	345727	TRUE	6.33615832737753e-21
rs115546988	T	C	T	C	-0.130564	-0.0248766	0.12467	0.169005	FALSE	FALSE	FALSE	CuYyr2	210448220	0.749064	0.0777701	outcome	TRUE	reported	textfile	345727	0.0233491	2.2471e-08	8271	exposure	TRUE	reported	Tjjq0S	textfile	2	1	TRUE	0.00376625594591506	31.260906993611	112.151818947473	NA	NA	0.00376716344811464	8271	2.95955092630725e-07	345727	TRUE	4.41390610832728e-08
rs116012745	T	C	T	C	-0.157363	-0.0394873	0.0906422	0.071485	FALSE	FALSE	FALSE	CuYyr2	210506225	0.726678	0.112967	outcome	TRUE	reported	textfile	345727	0.0270973	6.34707e-09	8271	exposure	TRUE	reported	Tjjq0S	textfile	2	1	TRUE	0.00406095290363203	33.7169424755811	112.151818947473	NA	NA	0.00406193112532574	8271	3.53411557935351e-07	345727	TRUE	1.33557640196124e-08
rs116224031	T	G	T	G	0.414159	0.0307026	0.0127724	0.0198142	FALSE	FALSE	FALSE	CuYyr2	210824904	0.886868	0.215807	outcome	TRUE	reported	textfile	345727	0.0685205	1.50046e-09	8271	exposure	TRUE	reported	Tjjq0S	textfile	2	1	TRUE	0.00439765393539782	36.524823927489	112.151818947473	NA	NA	0.00439871290502372	8271	5.8544815724616e-08	345727	TRUE	2.73417314365929e-09
rs11889880	A	G	A	G	0.148127	0.177502	0.120491	0.111159	FALSE	FALSE	FALSE	CuYyr2	210614885	0.0560248	0.0928917	outcome	TRUE	reported	textfile	345727	0.0236518	3.78083e-10	8271	exposure	TRUE	reported	Tjjq0S	textfile	2	1	TRUE	0.00471984116882228	39.2134478706227	112.151818947473	NA	NA	0.00472097735431159	8271	1.05612982630246e-05	345727	TRUE	3.81633617199781e-09
rs12328639	G	A	G	A	-0.187452	-0.102877	0.152104	0.0789816	FALSE	FALSE	FALSE	CuYyr2	210811599	0.339591	0.107728	outcome	TRUE	reported	textfile	345727	0.0215601	3.48609e-18	8271	exposure	TRUE	reported	Tjjq0S	textfile	2	1	TRUE	0.00905668796989678	75.5742048146559	112.151818947473	NA	NA	0.00905885864221842	8271	2.63783397385225e-06	345727	TRUE	3.37617491525312e-17
rs13009600	A	G	A	G	0.199235	-0.000739342	0.365626	0.372556	FALSE	FALSE	FALSE	CuYyr2	210907900	0.990159	0.059943	outcome	TRUE	reported	textfile	345727	0.0159402	7.56565e-36	8271	exposure	TRUE	reported	Tjjq0S	textfile	2	1	TRUE	0.0185378461120925	156.184778897139	112.151818947473	NA	NA	0.0185422466714822	8271	4.40030744665419e-10	345727	TRUE	7.91569569253606e-35
rs13011429	C	G	C	G	-0.14031	0.0673668	0.14205	0.136565	FALSE	TRUE	FALSE	CuYyr2	210730607	0.420316	0.0835948	outcome	TRUE	reported	textfile	345727	0.0223357	3.34509e-10	8271	exposure	TRUE	reported	Tjjq0S	textfile	2	1	TRUE	0.00474846181891443	39.4523688477427	112.151818947473	NA	NA	0.00474960486124158	8271	1.87845895269863e-06	345727	TRUE	1.20471585204599e-09
rs140369375	A	C	A	C	0.387814	0.120328	0.0136286	0.0131766	FALSE	FALSE	FALSE	CuYyr2	210655834	0.644233	0.260569	outcome	TRUE	reported	textfile	345727	0.0665895	5.74753e-09	8271	exposure	TRUE	reported	Tjjq0S	textfile	2	1	TRUE	0.00408413498946721	33.9102060870847	112.151818947473	NA	NA	0.00408511877246708	8271	6.16817732966336e-07	345727	TRUE	1.34155329303737e-08
rs143955150	A	G	A	G	0.324693	-0.0285361	0.0278836	0.0693869	FALSE	FALSE	FALSE	CuYyr2	210787603	0.810312	0.118889	outcome	TRUE	reported	textfile	345727	0.0471067	5.47352e-12	8271	exposure	TRUE	reported	Tjjq0S	textfile	2	1	TRUE	0.00571129998352644	47.4980149759297	112.151818947473	NA	NA	0.00571267346839562	8271	1.66638378336841e-07	345727	TRUE	1.3044512017141e-11
rs4441401	T	C	T	C	0.239966	-0.212007	0.953567	0.953741	FALSE	FALSE	FALSE	CuYyr2	210927298	0.133064	0.141138	outcome	TRUE	reported	textfile	345727	0.0362159	3.44951e-11	8271	exposure	TRUE	reported	Tjjq0S	textfile	2	1	TRUE	0.00528011811392168	43.8930572104708	112.151818947473	NA	NA	0.00528138845658925	8271	6.52647777720995e-06	345727	TRUE	2.74732302017756e-10
rs55933544	T	C	T	C	-0.114008	0.0701866	0.247807	0.216753	FALSE	FALSE	FALSE	CuYyr2	6534080	0.3177	0.0702431	outcome	TRUE	reported	textfile	345727	0.0178502	1.69227e-10	8271	exposure	TRUE	reported	Tjjq0S	textfile	2	1	TRUE	0.00490783290520706	40.7830265729458	112.151818947473	NA	NA	0.00490901412186788	8271	2.88781275544538e-06	345727	TRUE	7.57254418500559e-10
rs62177972	C	A	C	A	0.254399	0.128273	0.0508725	0.0726197	FALSE	FALSE	FALSE	CuYyr2	211008029	0.265254	0.11514	outcome	TRUE	reported	textfile	345727	0.0358225	1.23264e-12	8271	exposure	TRUE	reported	Tjjq0S	textfile	2	1	TRUE	0.00606067325246185	50.4212941131933	112.151818947473	NA	NA	0.00606213024427751	8271	3.58992775954957e-06	345727	TRUE	7.89552565993088e-12
rs62201970	C	T	C	T	0.329598	0.275468	0.0178182	0.00572898	FALSE	FALSE	FALSE	CuYyr2	210731716	0.45382	0.367751	outcome	TRUE	reported	textfile	345727	0.05764	1.07646e-08	8271	exposure	TRUE	reported	Tjjq0S	textfile	2	1	TRUE	0.00393776364782021	32.6900934655177	112.151818947473	NA	NA	0.0039387123124543	8271	1.62294236426134e-06	345727	TRUE	3.15686457014173e-08
rs62203749	T	A	T	A	0.412877	0.0741223	0.0258536	0.0106622	FALSE	TRUE	FALSE	CuYyr2	210675259	0.791927	0.280969	outcome	TRUE	reported	textfile	345727	0.0485813	1.91772e-17	8271	exposure	TRUE	reported	Tjjq0S	textfile	2	1	TRUE	0.00865703206877866	72.2101235318363	112.151818947473	NA	NA	0.00865910779012222	8271	2.01302926949752e-07	345727	TRUE	7.07083591489837e-17
rs73078181	G	A	G	A	-0.199272	-0.079797	0.151241	0.19753	FALSE	FALSE	FALSE	CuYyr2	210762660	0.276414	0.0733152	outcome	TRUE	reported	textfile	345727	0.0212583	6.99213e-21	8271	exposure	TRUE	reported	Tjjq0S	textfile	2	1	TRUE	0.0105120635820667	87.8477145206902	112.151818947473	NA	NA	0.0105145793720426	8271	3.42651634387395e-06	345727	TRUE	1.08076518148378e-19
rs74383932	C	G	C	G	0.422788	-0.0109516	0.0274172	0.0196131	FALSE	TRUE	FALSE	CuYyr2	210743282	0.959456	0.215429	outcome	TRUE	reported	textfile	345727	0.047311	4.02193e-19	8271	exposure	TRUE	reported	Tjjq0S	textfile	2	1	TRUE	0.00956290684184693	79.8391712320546	112.151818947473	NA	NA	0.00956519767163229	8271	7.47508312754522e-09	345727	TRUE	1.26352846363414e-18
rs7586705	T	C	T	C	0.181323	0.0524006	0.198183	0.151491	FALSE	FALSE	FALSE	CuYyr2	210792951	0.514913	0.0804669	outcome	TRUE	reported	textfile	345727	0.0192162	3.8758e-21	8271	exposure	TRUE	reported	Tjjq0S	textfile	2	1	TRUE	0.0106503178508516	89.0155219107005	112.151818947473	NA	NA	0.0106528663721814	8271	1.22661045142668e-06	345727	TRUE	3.31149211679663e-20
rs7607205	G	T	G	T	-0.120503	-0.100888	0.407824	0.437709	FALSE	FALSE	FALSE	CuYyr2	210624379	0.0852177	0.0586154	outcome	TRUE	reported	textfile	345727	0.0156883	1.57757e-14	8271	exposure	TRUE	reported	Tjjq0S	textfile	2	1	TRUE	0.00708270254241244	58.9846379685113	112.151818947473	NA	NA	0.00708440347984619	8271	8.56882064422109e-06	345727	TRUE	2.51053789260834e-13
Phosphate to threonine ratio
SNP	effect_allele.exposure	other_allele.exposure	effect_allele.outcome	other_allele.outcome	beta.exposure	beta.outcome	eaf.exposure	eaf.outcome	remove	palindromic	ambiguous	id.outcome	pos.outcome	pval.outcome	se.outcome	outcome	mr_keep.outcome	pval_origin.outcome	data_source.outcome	samplesize.outcome	se.exposure	pval.exposure	samplesize.exposure	exposure	mr_keep.exposure	pval_origin.exposure	id.exposure	data_source.exposure	action	SNP_index	mr_keep	R2	f	meanf	units.outcome	units.exposure	rsq.exposure	effective_n.exposure	rsq.outcome	effective_n.outcome	steiger_dir	steiger_pval
rs1047891	A	C	A	C	0.0975868	0.0496331	0.308766	0.32337	FALSE	FALSE	FALSE	jxWtG2	210675783	0.425271	0.0622507	outcome	TRUE	reported	textfile	345727	0.016399	2.66843e-09	8226	exposure	TRUE	reported	pVqBwp	textfile	2	1	TRUE	0.00428640452177967	35.4031429792676	35.8466708873108	NA	NA	0.00428744246604256	8226	1.83875023014009e-06	345727	TRUE	8.6565190305384e-09
rs1260326	C	T	C	T	-0.104084	-0.123553	0.588085	0.650088	FALSE	FALSE	FALSE	jxWtG2	27508073	0.0417359	0.0606798	outcome	TRUE	reported	textfile	345727	0.0153971	1.38031e-11	8226	exposure	TRUE	reported	pVqBwp	textfile	2	1	TRUE	0.00552453153014676	45.6861418349851	35.8466708873108	NA	NA	0.00552586762054079	8226	1.19917430818088e-05	345727	TRUE	1.96490659524644e-10
rs17712208	A	T	A	T	-0.245397	-0.021916	0.0298005	0.0177103	FALSE	TRUE	FALSE	jxWtG2	213977102	0.919663	0.217295	outcome	TRUE	reported	textfile	345727	0.044725	4.09272e-08	8226	exposure	TRUE	reported	pVqBwp	textfile	2	1	TRUE	0.00364638562055742	30.0976228827569	35.8466708873108	NA	NA	0.00364726915321082	8226	2.9423363625003e-08	345727	TRUE	6.52867501535502e-08
rs1860371	C	G	C	G	0.129785	0.0957806	0.124649	0.114462	FALSE	TRUE	FALSE	jxWtG2	46791488	0.290711	0.0906529	outcome	TRUE	reported	textfile	345727	0.0228689	1.38548e-08	8226	exposure	TRUE	reported	pVqBwp	textfile	2	1	TRUE	0.00390007227615928	32.1997758522338	35.8466708873108	NA	NA	0.0039010170373528	8226	3.22893658205143e-06	345727	TRUE	5.21483130088727e-08
phosphate to asparagine ratio
SNP	effect_allele.exposure	other_allele.exposure	effect_allele.outcome	other_allele.outcome	beta.exposure	beta.outcome	eaf.exposure	eaf.outcome	remove	palindromic	ambiguous	id.outcome	pos.outcome	pval.outcome	se.outcome	outcome	mr_keep.outcome	pval_origin.outcome	data_source.outcome	samplesize.outcome	se.exposure	pval.exposure	samplesize.exposure	exposure	mr_keep.exposure	pval_origin.exposure	id.exposure	data_source.exposure	action	SNP_index	mr_keep	R2	f	meanf	units.outcome	units.exposure	rsq.exposure	effective_n.exposure	rsq.outcome	effective_n.outcome	steiger_dir	steiger_pval
rs10129899	A	C	A	C	-0.101661	-0.0477373	0.52524	0.46786	FALSE	FALSE	FALSE	SFyfwQ	103864095	0.412097	0.0582014	outcome	TRUE	reported	textfile	345727	0.0155332	5.95828e-11	8249	exposure	TRUE	reported	dA8Zc4	textfile	2	1	TRUE	0.00516578463862597	42.8234425966874	117.172954453589	NA	NA	0.00516703093251941	8249	1.94588517975017e-06	345727	TRUE	2.34421340480658e-10
rs11622831	T	C	T	C	-0.310108	-0.265219	0.0523122	0.0520767	FALSE	FALSE	FALSE	SFyfwQ	104154330	0.0457172	0.132743	outcome	TRUE	reported	textfile	345727	0.0333118	1.28745e-20	8249	exposure	TRUE	reported	dA8Zc4	textfile	2	1	TRUE	0.0103965592368581	86.6411943356312	117.172954453589	NA	NA	0.0103990543126075	8249	1.15464960029756e-05	345727	TRUE	6.76848468766108e-19
rs118182428	T	C	T	C	-0.303132	-0.161389	0.054915	0.0338549	FALSE	FALSE	FALSE	SFyfwQ	103899823	0.31523	0.160697	outcome	TRUE	reported	textfile	345727	0.0330076	4.1658e-20	8249	exposure	TRUE	reported	dA8Zc4	textfile	2	1	TRUE	0.0101208398326886	84.3199548580004	117.172954453589	NA	NA	0.010123269415287	8249	2.91742883209953e-06	345727	TRUE	5.24948880527672e-19
rs142679999	T	C	T	C	-0.22538	-0.022149	0.0435372	0.0773484	FALSE	FALSE	FALSE	SFyfwQ	103677792	0.838783	0.108867	outcome	TRUE	reported	textfile	345727	0.0374499	1.76382e-09	8249	exposure	TRUE	reported	dA8Zc4	textfile	2	1	TRUE	0.00437144946957138	36.2096323537011	117.172954453589	NA	NA	0.00437250496497214	8249	1.19725014453716e-07	345727	TRUE	3.38175674469168e-09
rs149784270	T	C	T	C	-0.411923	-0.189415	0.0201008	0.00914211	FALSE	FALSE	FALSE	SFyfwQ	104147597	0.540906	0.309784	outcome	TRUE	reported	textfile	345727	0.0537333	1.77349e-14	8249	exposure	TRUE	reported	dA8Zc4	textfile	2	1	TRUE	0.00707392852608018	58.7543123608227	117.172954453589	NA	NA	0.0070756319033111	8249	1.08138294385483e-06	345727	TRUE	7.80931147080045e-14
rs2282377	G	C	G	C	-0.549538	-0.222815	0.129912	0.121675	FALSE	TRUE	FALSE	SFyfwQ	104105483	0.0128393	0.0895487	outcome	TRUE	reported	textfile	345727	0.0216474	3.61907e-142	8249	exposure	TRUE	reported	dA8Zc4	textfile	2	1	TRUE	0.0724626289891458	644.285955424315	117.172954453589	NA	NA	0.0724789283986987	8249	1.79073662196365e-05	345727	TRUE	2.11036569271526e-131
rs35165685	G	A	G	A	0.199023	0.0201551	0.550031	0.568448	FALSE	FALSE	FALSE	SFyfwQ	104146026	0.730722	0.058562	outcome	TRUE	reported	textfile	345727	0.0150807	9.10895e-40	8249	exposure	TRUE	reported	dA8Zc4	textfile	2	1	TRUE	0.0206770306982992	174.123836072654	117.172954453589	NA	NA	0.0206819414269425	8249	3.42615636677988e-07	345727	TRUE	2.54779505435244e-38
rs4654748	T	C	T	C	0.0857182	-0.0339473	0.483846	0.473371	FALSE	FALSE	FALSE	SFyfwQ	21459575	0.557843	0.0579257	outcome	TRUE	reported	textfile	345727	0.0151308	1.46911e-08	8249	exposure	TRUE	reported	dA8Zc4	textfile	2	1	TRUE	0.00387556116505409	32.0861045890844	117.172954453589	NA	NA	0.00387649739339465	8249	9.93428645184324e-07	345727	TRUE	3.68418101223929e-08
rs61997568	T	C	T	C	-0.326887	-0.189438	0.0303435	0.0393573	FALSE	FALSE	FALSE	SFyfwQ	103910480	0.21168	0.151677	outcome	TRUE	reported	textfile	345727	0.0443494	1.697e-13	8249	exposure	TRUE	reported	dA8Zc4	textfile	2	1	TRUE	0.00654286008491533	54.3143382359795	117.172954453589	NA	NA	0.0065444364255854	8249	4.51192627566816e-06	345727	TRUE	1.38725187606111e-12
rs72923302	T	C	T	C	0.127684	-0.0551007	0.137761	0.0852539	FALSE	FALSE	FALSE	SFyfwQ	62431582	0.597945	0.104484	outcome	TRUE	reported	textfile	345727	0.0220246	6.73725e-09	8249	exposure	TRUE	reported	dA8Zc4	textfile	2	1	TRUE	0.00405779155844577	33.6009526444989	117.172954453589	NA	NA	0.00405877162923738	8249	8.04421216755616e-07	345727	TRUE	1.65480113469512e-08
rs8013778	C	G	C	G	0.23533	0.127161	0.952372	0.921674	FALSE	TRUE	FALSE	SFyfwQ	104154602	0.249495	0.110423	outcome	TRUE	reported	textfile	345727	0.0364195	1.03578e-10	8249	exposure	TRUE	reported	dA8Zc4	textfile	2	1	TRUE	0.00503608045859443	41.7427755181024	117.172954453589	NA	NA	0.00503729561858777	8249	3.83580334898468e-06	345727	TRUE	5.49016450891114e-10
Cysteinylglycine to taurine ratio
SNP	effect_allele.exposure	other_allele.exposure	effect_allele.outcome	other_allele.outcome	beta.exposure	beta.outcome	eaf.exposure	eaf.outcome	remove	palindromic	ambiguous	id.outcome	pos.outcome	pval.outcome	se.outcome	outcome	mr_keep.outcome	pval_origin.outcome	data_source.outcome	samplesize.outcome	se.exposure	pval.exposure	samplesize.exposure	exposure	mr_keep.exposure	pval_origin.exposure	id.exposure	data_source.exposure	action	SNP_index	mr_keep	R2	f	meanf	units.outcome	units.exposure	rsq.exposure	effective_n.exposure	rsq.outcome	effective_n.outcome	steiger_dir	steiger_pval
rs258341	C	T	C	T	-0.165396	-0.0574624	0.594363	0.569101	FALSE	FALSE	FALSE	MHgdAr	89624734	0.3286	0.058819	outcome	TRUE	reported	textfile	345727	0.0153841	5.8537e-27	8193	exposure	TRUE	reported	eza2xW	textfile	2	1	TRUE	0.013911651457691	115.557938858516	71.6774642685342	NA	NA	0.0139150010049535	8193	2.76057953698775e-06	345727	TRUE	1.43647810033635e-25
rs62070319	T	C	T	C	-0.0972926	-0.0847587	0.499019	0.504985	FALSE	FALSE	FALSE	MHgdAr	89506808	0.144928	0.0581462	outcome	TRUE	reported	textfile	345727	0.0147611	4.36427e-11	8193	exposure	TRUE	reported	eza2xW	textfile	2	1	TRUE	0.00527451418101004	43.4326316884123	71.6774642685342	NA	NA	0.0052757952668174	8193	6.14599841703654e-06	345727	TRUE	3.24597115851123e-10
rs77463543	T	C	T	C	0.162404	0.219176	0.139887	0.150664	FALSE	FALSE	FALSE	MHgdAr	89945823	0.00423867	0.0766395	outcome	TRUE	reported	textfile	345727	0.0216914	7.04458e-14	8193	exposure	TRUE	reported	eza2xW	textfile	2	1	TRUE	0.00679538475328431	56.0418222586747	71.6774642685342	NA	NA	0.00679703270745373	8193	2.36559072612109e-05	345727	TRUE	3.50123031568141e-12
Retinol (Vitamin A) to oleoyl-linoleoyl-glycerol (18:1 to 18:2) [2] ratio
SNP	effect_allele.exposure	other_allele.exposure	effect_allele.outcome	other_allele.outcome	beta.exposure	beta.outcome	eaf.exposure	eaf.outcome	remove	palindromic	ambiguous	id.outcome	pos.outcome	pval.outcome	se.outcome	outcome	mr_keep.outcome	pval_origin.outcome	data_source.outcome	samplesize.outcome	se.exposure	pval.exposure	samplesize.exposure	exposure	mr_keep.exposure	pval_origin.exposure	id.exposure	data_source.exposure	action	SNP_index	mr_keep	R2	f	meanf	units.outcome	units.exposure	rsq.exposure	effective_n.exposure	rsq.outcome	effective_n.outcome	steiger_dir	steiger_pval
rs1168041	C	T	C	T	-0.0963528	-0.00176656	0.668129	0.73329	FALSE	FALSE	FALSE	ZQqMD1	62494579	0.978448	0.0653923	outcome	TRUE	reported	textfile	345727	0.0168391	1.05286e-08	7981	exposure	TRUE	reported	D72wUR	textfile	2	1	TRUE	0.00408559797281526	32.7327189553015	46.6366568182127	NA	NA	0.00408661787548354	7981	2.11092485395262e-09	345727	TRUE	1.6157573209729e-08
rs116843064	A	G	A	G	0.305771	-0.019145	0.0211965	0.0272898	FALSE	FALSE	FALSE	ZQqMD1	8364439	0.914678	0.178691	outcome	TRUE	reported	textfile	345727	0.0537449	1.27558e-08	7981	exposure	TRUE	reported	D72wUR	textfile	2	1	TRUE	0.0040392708231803	32.3600529157347	46.6366568182127	NA	NA	0.00404027920795064	7981	3.32027903458117e-08	345727	TRUE	2.08815594652021e-08
rs174533	A	G	A	G	-0.0949128	-0.0519572	0.340159	0.415406	FALSE	FALSE	FALSE	ZQqMD1	61781553	0.375546	0.0586336	outcome	TRUE	reported	textfile	345727	0.016554	9.83722e-09	7981	exposure	TRUE	reported	D72wUR	textfile	2	1	TRUE	0.00410205232703475	32.8650898356488	46.6366568182127	NA	NA	0.0041030763203405	7981	2.27125860560918e-06	345727	TRUE	3.18098972789803e-08
rs2070669	G	C	G	C	0.0959534	-0.0200058	0.719596	0.695096	FALSE	TRUE	FALSE	ZQqMD1	116830406	0.751187	0.0630949	outcome	TRUE	reported	textfile	345727	0.0174858	4.07641e-08	7981	exposure	TRUE	reported	D72wUR	textfile	2	1	TRUE	0.00375886632430001	30.1051556573781	46.6366568182127	NA	NA	0.00375980497167939	7981	2.90798673604831e-07	345727	TRUE	7.70526960506144e-08
rs2119690	A	G	A	G	0.10458	0.0246425	0.290892	0.256626	FALSE	FALSE	FALSE	ZQqMD1	20002028	0.708969	0.0660229	outcome	TRUE	reported	textfile	345727	0.0171495	1.0732e-09	7981	exposure	TRUE	reported	D72wUR	textfile	2	1	TRUE	0.00463786554929603	37.1779555771978	46.6366568182127	NA	NA	0.00463902267434575	7981	4.02948345862561e-07	345727	TRUE	2.40378852380279e-09
rs2523454	A	G	A	G	0.0937994	0.00546867	0.30227	0.303327	FALSE	FALSE	FALSE	ZQqMD1	31400088	0.93074	0.0629205	outcome	TRUE	reported	textfile	345727	0.0169234	2.98048e-08	7981	exposure	TRUE	reported	D72wUR	textfile	2	1	TRUE	0.00383441491081399	30.7125612762919	46.6366568182127	NA	NA	0.00383537235122053	7981	2.18498424314369e-08	345727	TRUE	4.68644442757214e-08
rs483082	T	G	T	G	-0.118693	-0.206831	0.225226	0.23654	FALSE	FALSE	FALSE	ZQqMD1	44912921	0.00311186	0.0699588	outcome	TRUE	reported	textfile	345727	0.0186883	2.13654e-10	7981	exposure	TRUE	reported	D72wUR	textfile	2	1	TRUE	0.00502879372177982	40.3275440061943	46.6366568182127	NA	NA	0.00503004788862993	7981	2.52816139546814e-05	345727	TRUE	5.56042545383216e-09
rs964184	C	G	C	G	0.267926	0.149883	0.867882	0.85548	FALSE	TRUE	FALSE	ZQqMD1	116778201	0.0672404	0.0819003	outcome	TRUE	reported	textfile	345727	0.0229033	1.30228e-31	7981	exposure	TRUE	reported	D72wUR	textfile	2	1	TRUE	0.0168574842972718	136.812176321955	46.6366568182127	NA	NA	0.0168616385119581	7981	9.68721138904515e-06	345727	TRUE	2.13726488137039e-29
Glucose-to-mannose ratio
SNP	effect_allele.exposure	other_allele.exposure	effect_allele.outcome	other_allele.outcome	beta.exposure	beta.outcome	eaf.exposure	eaf.outcome	remove	palindromic	ambiguous	id.outcome	pos.outcome	pval.outcome	se.outcome	outcome	mr_keep.outcome	pval_origin.outcome	data_source.outcome	samplesize.outcome	se.exposure	pval.exposure	samplesize.exposure	exposure	mr_keep.exposure	pval_origin.exposure	id.exposure	data_source.exposure	action	SNP_index	mr_keep	R2	f	meanf	units.outcome	units.exposure	rsq.exposure	effective_n.exposure	rsq.outcome	effective_n.outcome	steiger_dir	steiger_pval
rs1260326	C	T	C	T	-0.283336	-0.123553	0.588156	0.650088	FALSE	FALSE	FALSE	Ebrt3C	27508073	0.0417359	0.0606798	outcome	TRUE	reported	textfile	345727	0.0154584	4.86511e-75	8191	exposure	TRUE	reported	6yUJQd	textfile	2	1	TRUE	0.0393985943115002	335.867808339953	85.1358242110132	NA	NA	0.0394078374378676	8191	1.19917430818088e-05	345727	TRUE	5.64655255385464e-70
rs1371614	T	C	T	C	-0.10167	-0.000379264	0.251834	0.227354	FALSE	FALSE	FALSE	Ebrt3C	26930006	0.995611	0.0689506	outcome	TRUE	reported	textfile	345727	0.0178957	1.33726e-08	8191	exposure	TRUE	reported	6yUJQd	textfile	2	1	TRUE	0.00392503347693973	32.2687550866337	85.1358242110132	NA	NA	0.00392598832462353	8191	8.75137628095764e-11	345727	TRUE	2.01991131877582e-08
rs151200397	TC	T	TC	T	-0.195256	-0.239942	0.0557118	0.041026	FALSE	FALSE	FALSE	Ebrt3C	27516511	0.101341	0.14645	outcome	TRUE	reported	textfile	345727	0.0337545	7.26846e-09	8191	exposure	TRUE	reported	6yUJQd	textfile	2	1	TRUE	0.00406853396390282	33.4533306423242	85.1358242110132	NA	NA	0.00406952357850021	8191	7.7642523064067e-06	345727	TRUE	4.65932056489365e-08
rs35315097	C	A	C	A	0.211714	0.140651	0.0605672	0.064667	FALSE	FALSE	FALSE	Ebrt3C	27706156	0.240989	0.119956	outcome	TRUE	reported	textfile	345727	0.0322662	5.32798e-11	8191	exposure	TRUE	reported	6yUJQd	textfile	2	1	TRUE	0.00522865339553737	43.042496953906	85.1358242110132	NA	NA	0.0052299237113115	8191	3.97657506667136e-06	345727	TRUE	2.9626045561009e-10
rs58199976	C	T	C	T	-0.16475	-0.031314	0.272055	0.308352	FALSE	FALSE	FALSE	Ebrt3C	27711657	0.617332	0.0626739	outcome	TRUE	reported	textfile	345727	0.0174834	4.37473e-21	8191	exposure	TRUE	reported	6yUJQd	textfile	2	1	TRUE	0.010724556993895	88.7754748628325	85.1358242110132	NA	NA	0.0107271481559617	8191	7.22058782849474e-07	345727	TRUE	2.96364800801049e-20
rs74873433	C	T	C	T	0.182503	-0.0109359	0.0598101	0.0466095	FALSE	FALSE	FALSE	Ebrt3C	28054547	0.93615	0.136511	outcome	TRUE	reported	textfile	345727	0.0329503	3.04653e-08	8191	exposure	TRUE	reported	6yUJQd	textfile	2	1	TRUE	0.0037313056640328	30.6701016066058	85.1358242110132	NA	NA	0.00373221355990151	8191	1.85627780146439e-08	345727	TRUE	4.8055765518282e-08
rs78484886	G	A	G	A	0.184025	-0.0659624	0.0599437	0.0595572	FALSE	FALSE	FALSE	Ebrt3C	27414892	0.591018	0.122752	outcome	TRUE	reported	textfile	345727	0.0325922	1.63938e-08	8191	exposure	TRUE	reported	6yUJQd	textfile	2	1	TRUE	0.00387705816067867	31.8728019848366	85.1358242110132	NA	NA	0.00387800138278729	8191	8.35227136131719e-07	345727	TRUE	3.90928028283588e-08
Benzoate to oleoyl-linoleoyl-glycerol (18:1 to 18:2) [2] ratio
SNP	effect_allele.exposure	other_allele.exposure	effect_allele.outcome	other_allele.outcome	beta.exposure	beta.outcome	eaf.exposure	eaf.outcome	remove	palindromic	ambiguous	id.outcome	pos.outcome	pval.outcome	se.outcome	outcome	mr_keep.outcome	pval_origin.outcome	data_source.outcome	samplesize.outcome	se.exposure	pval.exposure	samplesize.exposure	exposure	mr_keep.exposure	pval_origin.exposure	id.exposure	data_source.exposure	action	SNP_index	mr_keep	R2	f	meanf	units.outcome	units.exposure	rsq.exposure	effective_n.exposure	rsq.outcome	effective_n.outcome	steiger_dir	steiger_pval
rs1168041	C	T	C	T	-0.0977144	-0.00176656	0.668149	0.73329	FALSE	FALSE	FALSE	KONpXc	62494579	0.978448	0.0653923	outcome	TRUE	reported	textfile	345727	0.0178193	4.16697e-08	7162	exposure	TRUE	reported	LU9SGT	textfile	2	1	TRUE	0.00418101710549509	30.0617712551842	49.3067308532036	NA	NA	0.0041821801030758	7162	2.11092485395262e-09	345727	TRUE	5.96991135324211e-08
rs584007	G	A	G	A	-0.108466	-0.0695432	0.623741	0.716299	FALSE	FALSE	FALSE	KONpXc	44913221	0.279568	0.064315	outcome	TRUE	reported	textfile	345727	0.0171806	2.73201e-10	7162	exposure	TRUE	reported	LU9SGT	textfile	2	1	TRUE	0.00553434296345015	39.8464193689563	49.3067308532036	NA	NA	0.00553588031135607	7162	3.38183597243251e-06	345727	TRUE	1.13841325907819e-09
rs59007384	T	G	T	G	-0.132959	-0.211208	0.203579	0.222598	FALSE	FALSE	FALSE	KONpXc	44893408	0.00331146	0.071907	outcome	TRUE	reported	textfile	345727	0.0204015	7.16728e-11	7162	exposure	TRUE	reported	LU9SGT	textfile	2	1	TRUE	0.00589534292387812	42.460977357372	49.3067308532036	NA	NA	0.00589697995689622	7162	2.49538043233321e-05	345727	TRUE	1.68582372908639e-09
rs964184	C	G	C	G	0.224823	0.149883	0.869188	0.85548	FALSE	TRUE	FALSE	KONpXc	116778201	0.0672404	0.0819003	outcome	TRUE	reported	textfile	345727	0.0244025	3.16828e-20	7162	exposure	TRUE	reported	LU9SGT	textfile	2	1	TRUE	0.0117128256062289	84.8577554313016	49.3067308532036	NA	NA	0.0117160590133379	7162	9.68721138904515e-06	345727	TRUE	9.57517667081662e-19
Histidine to asparagine ratio
SNP	effect_allele.exposure	other_allele.exposure	effect_allele.outcome	other_allele.outcome	beta.exposure	beta.outcome	eaf.exposure	eaf.outcome	remove	palindromic	ambiguous	id.outcome	pos.outcome	pval.outcome	se.outcome	outcome	mr_keep.outcome	pval_origin.outcome	data_source.outcome	samplesize.outcome	se.exposure	pval.exposure	samplesize.exposure	exposure	mr_keep.exposure	pval_origin.exposure	id.exposure	data_source.exposure	action	SNP_index	mr_keep	R2	f	meanf	units.outcome	units.exposure	rsq.exposure	effective_n.exposure	rsq.outcome	effective_n.outcome	steiger_dir	steiger_pval
rs11622831	T	C	T	C	-0.297625	-0.265219	0.0522215	0.0520767	FALSE	FALSE	FALSE	eass4p	104154330	0.0457172	0.132743	outcome	TRUE	reported	textfile	345727	0.0340306	2.21472e-18	8225	exposure	TRUE	reported	Mfi0lV	textfile	2	1	TRUE	0.0092139022759225	76.4705102230963	124.498927206298	NA	NA	0.00921612263000803	8225	1.15464960029756e-05	345727	TRUE	8.41570304333922e-17
rs117763903	T	C	T	C	-0.358962	0.0725372	0.0182782	0.0119095	FALSE	FALSE	FALSE	eass4p	104220756	0.78916	0.271267	outcome	TRUE	reported	textfile	345727	0.0575005	4.29913e-10	8225	exposure	TRUE	reported	Mfi0lV	textfile	2	1	TRUE	0.00471590305153778	38.9626147063849	124.498927206298	NA	NA	0.00471704464412596	8225	2.06822017758922e-07	345727	TRUE	9.13491886469862e-10
rs118182428	T	C	T	C	-0.359068	-0.161389	0.0550146	0.0338549	FALSE	FALSE	FALSE	eass4p	103899823	0.31523	0.160697	outcome	TRUE	reported	textfile	345727	0.033591	1.14088e-26	8225	exposure	TRUE	reported	Mfi0lV	textfile	2	1	TRUE	0.01370186999695	114.235719968943	124.498927206298	NA	NA	0.0137051568955804	8225	2.91742883209953e-06	345727	TRUE	2.85637356263246e-25
rs12886129	C	T	C	T	-0.186518	-0.0203652	0.374445	0.327322	FALSE	FALSE	FALSE	eass4p	104143076	0.741454	0.0617259	outcome	TRUE	reported	textfile	345727	0.0159114	9.79896e-32	8225	exposure	TRUE	reported	Mfi0lV	textfile	2	1	TRUE	0.016432103095814	137.378603126614	124.498927206298	NA	NA	0.0164360340272235	8225	3.14855710994862e-07	345727	TRUE	1.28414355873098e-30
rs142169554	GGT	G	GGT	G	0.140283	0.0354888	0.283555	0.392677	FALSE	FALSE	FALSE	eass4p	103689065	0.549924	0.0593584	outcome	TRUE	reported	textfile	345727	0.0171632	2.99572e-16	8225	exposure	TRUE	reported	Mfi0lV	textfile	2	1	TRUE	0.00805683456147172	66.7894622467537	124.498927206298	NA	NA	0.00805877835481174	8225	1.03392020565836e-06	345727	TRUE	1.51798111170947e-15
rs142679999	T	C	T	C	-0.268119	-0.022149	0.0439812	0.0773484	FALSE	FALSE	FALSE	eass4p	103677792	0.838783	0.108867	outcome	TRUE	reported	textfile	345727	0.0380139	1.74855e-12	8225	exposure	TRUE	reported	Mfi0lV	textfile	2	1	TRUE	0.00601195306349765	49.7352963081449	124.498927206298	NA	NA	0.00601340649916489	8225	1.19725014453716e-07	345727	TRUE	4.13937117688334e-12
rs149784270	T	C	T	C	-0.495656	-0.189415	0.0201603	0.00914211	FALSE	FALSE	FALSE	eass4p	104147597	0.540906	0.309784	outcome	TRUE	reported	textfile	345727	0.0546734	1.2374e-19	8225	exposure	TRUE	reported	Mfi0lV	textfile	2	1	TRUE	0.00989360415201138	82.1680450536955	124.498927206298	NA	NA	0.00989598666378987	8225	1.08138294385483e-06	345727	TRUE	8.65427697407902e-19
rs1557015	C	T	C	T	0.251549	0.125017	0.951368	0.922358	FALSE	FALSE	FALSE	eass4p	104144003	0.255754	0.110003	outcome	TRUE	reported	textfile	345727	0.035847	2.26226e-12	8225	exposure	TRUE	reported	Mfi0lV	textfile	2	1	TRUE	0.00595129278724734	49.2304655038004	124.498927206298	NA	NA	0.00595273164565384	8225	3.73591235880238e-06	345727	TRUE	1.43058433489119e-11
rs1799795	A	G	A	G	-0.192374	-0.0683398	0.067779	0.0378219	FALSE	FALSE	FALSE	eass4p	103708488	0.647664	0.149537	outcome	TRUE	reported	textfile	345727	0.0307551	3.97441e-10	8225	exposure	TRUE	reported	Mfi0lV	textfile	2	1	TRUE	0.00473436314075869	39.1158567770029	124.498927206298	NA	NA	0.00473550918077344	8225	6.0411418318742e-07	345727	TRUE	1.01502915873731e-09
rs1974562	C	T	C	T	-0.0991104	0.0354784	0.738648	0.782265	FALSE	FALSE	FALSE	eass4p	97873425	0.615541	0.0706486	outcome	TRUE	reported	textfile	345727	0.0177772	2.47308e-08	8225	exposure	TRUE	reported	Mfi0lV	textfile	2	1	TRUE	0.00376476379005963	31.0746413301291	124.498927206298	NA	NA	0.00376567600869258	8225	7.29440427466408e-07	345727	TRUE	5.64589612595739e-08
rs2463822	C	T	C	T	-0.175231	-0.0461683	0.876369	0.92418	FALSE	FALSE	FALSE	eass4p	62335948	0.667841	0.10759	outcome	TRUE	reported	textfile	345727	0.0231887	4.13254e-14	8225	exposure	TRUE	reported	Mfi0lV	textfile	2	1	TRUE	0.0068949064413064	57.0904489712112	124.498927206298	NA	NA	0.00689657185665934	8225	5.32614438021505e-07	345727	TRUE	1.42495021027977e-13
rs8012505	G	C	G	C	-0.601381	-0.222642	0.13031	0.121727	FALSE	TRUE	FALSE	eass4p	104104717	0.0129244	0.0895639	outcome	TRUE	reported	textfile	345727	0.0219313	1.53573e-165	8225	exposure	TRUE	reported	Mfi0lV	textfile	2	1	TRUE	0.0837612947391	751.735462259796	124.498927206298	NA	NA	0.0837799603785953	8225	1.78735018151624e-05	345727	TRUE	1.03581170218608e-152
Alanine to asparagine ratio
SNP	effect_allele.exposure	other_allele.exposure	effect_allele.outcome	other_allele.outcome	beta.exposure	beta.outcome	eaf.exposure	eaf.outcome	remove	palindromic	ambiguous	id.outcome	pos.outcome	pval.outcome	se.outcome	outcome	mr_keep.outcome	pval_origin.outcome	data_source.outcome	samplesize.outcome	se.exposure	pval.exposure	samplesize.exposure	exposure	mr_keep.exposure	pval_origin.exposure	id.exposure	data_source.exposure	action	SNP_index	mr_keep	R2	f	meanf	units.outcome	units.exposure	rsq.exposure	effective_n.exposure	rsq.outcome	effective_n.outcome	steiger_dir	steiger_pval
rs10132514	T	C	T	C	-0.10626	-0.0714784	0.265851	0.216795	FALSE	FALSE	FALSE	krhR2g	103545852	0.307549	0.0700509	outcome	TRUE	reported	textfile	345727	0.0174722	1.18937e-09	8248	exposure	TRUE	reported	87kdQK	textfile	2	1	TRUE	0.00446429235878961	36.9776337584129	87.8682822567931	NA	NA	0.00446537030146248	8248	3.01155024295029e-06	345727	TRUE	4.92060358370314e-09
rs11622831	T	C	T	C	-0.264538	-0.265219	0.0523185	0.0520767	FALSE	FALSE	FALSE	krhR2g	104154330	0.0457172	0.132743	outcome	TRUE	reported	textfile	345727	0.0339848	7.0255e-15	8248	exposure	TRUE	reported	87kdQK	textfile	2	1	TRUE	0.00729254846849738	60.5761088812791	87.8682822567931	NA	NA	0.00729430431482305	8248	1.15464960029756e-05	345727	TRUE	1.60648870498795e-13
rs118182428	T	C	T	C	-0.243244	-0.161389	0.0549824	0.0338549	FALSE	FALSE	FALSE	krhR2g	103899823	0.31523	0.160697	outcome	TRUE	reported	textfile	345727	0.0336714	5.04661e-13	8248	exposure	TRUE	reported	87kdQK	textfile	2	1	TRUE	0.00628744285100893	52.174296657948	87.8682822567931	NA	NA	0.00628895822849754	8248	2.91742883209953e-06	345727	TRUE	2.98977542196101e-12
rs149784270	T	C	T	C	-0.458414	-0.189415	0.0201033	0.00914211	FALSE	FALSE	FALSE	krhR2g	104147597	0.540906	0.309784	outcome	TRUE	reported	textfile	345727	0.0546949	5.23476e-17	8248	exposure	TRUE	reported	87kdQK	textfile	2	1	TRUE	0.00844481842171155	70.2290442319022	87.8682822567931	NA	NA	0.00844684934247623	8248	1.08138294385483e-06	345727	TRUE	2.89625280608043e-16
rs2282377	G	C	G	C	-0.483398	-0.222815	0.129928	0.121675	FALSE	TRUE	FALSE	krhR2g	104105483	0.0128393	0.0895487	outcome	TRUE	reported	textfile	345727	0.0222685	1.73454e-104	8248	exposure	TRUE	reported	87kdQK	textfile	2	1	TRUE	0.0540443024060327	471.110136313627	87.8682822567931	NA	NA	0.054056701835008	8248	1.79073662196365e-05	345727	TRUE	9.40102688471766e-97
rs2463820	T	A	T	A	-0.133226	-0.0453049	0.878026	0.924118	FALSE	TRUE	FALSE	krhR2g	62344818	0.673577	0.10755	outcome	TRUE	reported	textfile	345727	0.0236159	1.68684e-08	8248	exposure	TRUE	reported	87kdQK	textfile	2	1	TRUE	0.00384368523359159	31.8173242154556	87.8682822567931	NA	NA	0.00384461390391609	8248	5.13261294110957e-07	345727	TRUE	3.64853094516408e-08
rs2693467	C	T	C	T	0.13844	0.210499	0.11006	0.0660645	FALSE	FALSE	FALSE	krhR2g	52403871	0.0699761	0.116165	outcome	TRUE	reported	textfile	345727	0.0250703	3.35041e-08	8248	exposure	TRUE	reported	87kdQK	textfile	2	1	TRUE	0.00368343337556542	30.4858843387695	87.8682822567931	NA	NA	0.00368432347074261	8248	9.49761520985291e-06	345727	TRUE	2.25320880402397e-07
rs35956368	T	G	T	G	0.183196	0.0187562	0.549737	0.567789	FALSE	FALSE	FALSE	krhR2g	104145424	0.748736	0.0585573	outcome	TRUE	reported	textfile	345727	0.0153871	1.10333e-32	8248	exposure	TRUE	reported	87kdQK	textfile	2	1	TRUE	0.0168954389669655	141.714111849102	87.8682822567931	NA	NA	0.0168994675662971	8248	2.96754086618086e-07	345727	TRUE	1.55170572899313e-31
rs61997568	T	C	T	C	-0.272296	-0.189438	0.0304079	0.0393573	FALSE	FALSE	FALSE	krhR2g	103910480	0.21168	0.151677	outcome	TRUE	reported	textfile	345727	0.0451818	1.67352e-09	8248	exposure	TRUE	reported	87kdQK	textfile	2	1	TRUE	0.00438428277592286	36.3119978369358	87.8682822567931	NA	NA	0.00438534148467833	8248	4.51192627566816e-06	345727	TRUE	8.37505892634306e-09
rs75704852	T	G	T	G	-0.309373	0.528019	0.0200874	0.0178752	FALSE	FALSE	FALSE	krhR2g	103297114	0.0154575	0.218056	outcome	TRUE	reported	textfile	345727	0.0544975	1.37218e-08	8248	exposure	TRUE	reported	87kdQK	textfile	2	1	TRUE	0.00389196966226261	32.2185755536336	87.8682822567931	NA	NA	0.00389290995296715	8248	1.69599617027875e-05	345727	TRUE	1.63410865331185e-07
rs780093	C	T	C	T	-0.103893	-0.101005	0.597767	0.6476	FALSE	FALSE	FALSE	krhR2g	27519736	0.0954993	0.0605881	outcome	TRUE	reported	textfile	345727	0.015698	3.63464e-11	8248	exposure	TRUE	reported	87kdQK	textfile	2	1	TRUE	0.00528244585880685	43.7903688040659	87.8682822567931	NA	NA	0.00528372030335993	8248	8.03853306456869e-06	345727	TRUE	3.38363927909405e-10
rs80020004	T	C	T	C	0.153021	-0.0393403	0.135293	0.11836	FALSE	FALSE	FALSE	krhR2g	104028779	0.66314	0.0903166	outcome	TRUE	reported	textfile	345727	0.0223144	7.00589e-12	8248	exposure	TRUE	reported	87kdQK	textfile	2	1	TRUE	0.00566909752967848	47.0139046403861	87.8682822567931	NA	NA	0.00567046472616455	8248	5.48793742905408e-07	345727	TRUE	2.02999423247391e-11
Glucuronate to androsterone glucuronide ratio
SNP	effect_allele.exposure	other_allele.exposure	effect_allele.outcome	other_allele.outcome	beta.exposure	beta.outcome	eaf.exposure	eaf.outcome	remove	palindromic	ambiguous	id.outcome	pos.outcome	pval.outcome	se.outcome	outcome	mr_keep.outcome	pval_origin.outcome	data_source.outcome	samplesize.outcome	se.exposure	pval.exposure	samplesize.exposure	exposure	mr_keep.exposure	pval_origin.exposure	id.exposure	data_source.exposure	action	SNP_index	mr_keep	R2	f	meanf	units.outcome	units.exposure	rsq.exposure	effective_n.exposure	rsq.outcome	effective_n.outcome	steiger_dir	steiger_pval
rs10897407	G	A	G	A	0.13516	0.0769039	0.629503	0.63562	FALSE	FALSE	FALSE	kG1q7m	63369912	0.201027	0.0601455	outcome	TRUE	reported	textfile	345727	0.0144469	8.30689e-21	7804	exposure	TRUE	reported	6z45mw	textfile	2	1	TRUE	0.0110913888355801	87.5055740421783	151.095722679158	NA	NA	0.0110942005091879	7804	4.72887256773361e-06	345727	TRUE	1.50901276973579e-19
rs111327720	A	C	A	C	-0.819666	-0.126486	0.0619469	0.0315895	FALSE	FALSE	FALSE	kG1q7m	63101192	0.426064	0.158913	outcome	TRUE	reported	textfile	345727	0.0274498	6.39704e-196	7804	exposure	TRUE	reported	6z45mw	textfile	2	1	TRUE	0.102539999957167	891.423661921018	151.095722679158	NA	NA	0.102563589582772	7804	1.83245991503206e-06	345727	TRUE	2.54727583296075e-183
rs559555	A	T	A	T	-0.0824083	-0.00727713	0.561465	0.579491	FALSE	TRUE	TRUE	kG1q7m	31585905	0.901836	0.0589995	outcome	TRUE	reported	textfile	345727	0.0141504	5.75478e-09	7804	exposure	TRUE	reported	6z45mw	textfile	2	1	FALSE	0.00432716915897405	33.9072963854991	151.095722679158	NA	NA	0.00432827360398479	7804	4.40040652388469e-08	345727	TRUE	9.67812803878694e-09
rs62129966	A	C	A	C	-0.141794	-0.0527331	0.162918	0.151012	FALSE	FALSE	FALSE	kG1q7m	47871693	0.520214	0.082009	outcome	TRUE	reported	textfile	345727	0.0189366	7.00382e-14	7804	exposure	TRUE	reported	6z45mw	textfile	2	1	TRUE	0.00713321670105617	56.053196297618	151.095722679158	NA	NA	0.00713503221527563	7804	1.19594792158898e-06	345727	TRUE	2.87938730225915e-13
rs76727724	C	T	C	T	-0.301543	-0.137564	0.0428425	0.0258019	FALSE	FALSE	FALSE	kG1q7m	62957050	0.438289	0.177483	outcome	TRUE	reported	textfile	345727	0.0342995	1.47598e-18	7804	exposure	TRUE	reported	6z45mw	textfile	2	1	TRUE	0.00980676164410176	77.2701240359123	151.095722679158	NA	NA	0.00980925089420652	7804	1.73765889968724e-06	345727	TRUE	1.09067823582375e-17
rs7925182	A	G	A	G	-0.121865	-0.0196009	0.192333	0.171711	FALSE	FALSE	FALSE	kG1q7m	63403264	0.798534	0.0767929	outcome	TRUE	reported	textfile	345727	0.0179185	1.03847e-11	7804	exposure	TRUE	reported	6z45mw	textfile	2	1	TRUE	0.00589211131457129	46.2427197284135	151.095722679158	NA	NA	0.00589361282328489	7804	1.88442571377741e-07	345727	TRUE	2.37898727042772e-11
rs79630302	C	T	C	T	-0.58327	-0.302905	0.0141406	0.0154344	FALSE	FALSE	FALSE	kG1q7m	63532619	0.187913	0.230035	outcome	TRUE	reported	textfile	345727	0.0592162	6.86496e-23	7804	exposure	TRUE	reported	6z45mw	textfile	2	1	TRUE	0.0122793417408661	96.9945	151.095722679158	NA	NA	0.0122824508209301	7804	5.01524417843498e-06	345727	TRUE	1.662293904091e-21
rs9282858	T	C	T	C	0.239134	-0.0774951	0.0325695	0.0235931	FALSE	FALSE	FALSE	kG1q7m	31580756	0.677587	0.186395	outcome	TRUE	reported	textfile	345727	0.0396488	1.62647e-09	7804	exposure	TRUE	reported	6z45mw	textfile	2	1	TRUE	0.00463965443906969	36.3673157113992	151.095722679158	NA	NA	0.00464083826951142	7804	4.99975780390965e-07	345727	TRUE	3.68776206501072e-09
rs948980	C	G	C	G	0.139424	0.0568606	0.757117	0.752277	FALSE	TRUE	FALSE	kG1q7m	63016417	0.397988	0.067273	outcome	TRUE	reported	textfile	345727	0.0165981	4.46464e-17	7804	exposure	TRUE	reported	6z45mw	textfile	2	1	TRUE	0.00896049555482766	70.5418764894786	151.095722679158	NA	NA	0.00896277194156867	7804	2.06637720848315e-06	345727	TRUE	3.12907968354685e-16
rs9735993	C	T	C	T	0.157319	0.0474384	0.6389	0.547061	FALSE	FALSE	FALSE	kG1q7m	63037326	0.417992	0.0585724	outcome	TRUE	reported	textfile	345727	0.0146905	9.24994e-27	7804	exposure	TRUE	reported	6z45mw	textfile	2	1	TRUE	0.0144822614699013	114.651009891203	151.095722679158	NA	NA	0.0144859201401363	7804	1.89732800489869e-06	345727	TRUE	1.57212712415075e-25
Paraxanthine to 5-acetylamino-6-formylamino-3-methyluracil ratio
SNP	effect_allele.exposure	other_allele.exposure	effect_allele.outcome	other_allele.outcome	beta.exposure	beta.outcome	eaf.exposure	eaf.outcome	remove	palindromic	ambiguous	id.outcome	pos.outcome	pval.outcome	se.outcome	outcome	mr_keep.outcome	pval_origin.outcome	data_source.outcome	samplesize.outcome	se.exposure	pval.exposure	samplesize.exposure	exposure	mr_keep.exposure	pval_origin.exposure	id.exposure	data_source.exposure	action	SNP_index	mr_keep	R2	f	meanf	units.outcome	units.exposure	rsq.exposure	effective_n.exposure	rsq.outcome	effective_n.outcome	steiger_dir	steiger_pval
rs10099199	C	T	C	T	0.127221	-0.0622283	0.141703	0.151892	FALSE	FALSE	FALSE	lEUfUH	18520711	0.443938	0.0812846	outcome	TRUE	reported	textfile	345727	0.0233102	4.82219e-08	7388	exposure	TRUE	reported	US4l0b	textfile	2	1	TRUE	0.00401560749844756	29.778857185744	160.619727970302	NA	NA	0.00401669048735793	7388	1.6952267867206e-06	345727	TRUE	1.25249700189859e-07
rs1041983	T	C	T	C	0.558391	0.00217534	0.299619	0.277428	FALSE	FALSE	FALSE	lEUfUH	18400285	0.973149	0.0646278	outcome	TRUE	reported	textfile	345727	0.0166268	1e-200	7388	exposure	TRUE	reported	US4l0b	textfile	2	1	TRUE	0.132443422284395	1127.56578892912	160.619727970302	NA	NA	0.132474534670408	7388	3.2770627695487e-09	345727	TRUE	9.9516798633387e-231
rs111277508	G	T	G	T	0.239676	0.0206206	0.362069	0.347355	FALSE	FALSE	FALSE	lEUfUH	18444699	0.735802	0.0611131	outcome	TRUE	reported	textfile	345727	0.0172571	7.43276e-44	7388	exposure	TRUE	reported	US4l0b	textfile	2	1	TRUE	0.025444456238479	192.839448690668	160.619727970302	NA	NA	0.0254511707971134	7388	3.29308574605933e-07	345727	TRUE	2.52462692008918e-42
rs111653658	A	G	A	G	0.462114	-1.0449	0.0149517	0.00237437	FALSE	FALSE	FALSE	lEUfUH	18364965	0.102818	0.640513	outcome	TRUE	reported	textfile	345727	0.067105	5.72088e-12	7388	exposure	TRUE	reported	US4l0b	textfile	2	1	TRUE	0.00637797501081473	47.4101038877337	160.619727970302	NA	NA	0.00637969103721624	7388	7.69767254635916e-06	345727	TRUE	5.018481763851e-11
rs115999982	G	A	G	A	0.310378	-0.0752671	0.0336767	0.0209575	FALSE	FALSE	FALSE	lEUfUH	18361994	0.708459	0.201289	outcome	TRUE	reported	textfile	345727	0.044789	4.21478e-12	7388	exposure	TRUE	reported	US4l0b	textfile	2	1	TRUE	0.00645800637863812	48.0088767448708	160.619727970302	NA	NA	0.006459743797894	7388	4.04426235504124e-07	345727	TRUE	1.08323808944941e-11
rs117755792	T	A	T	A	-0.835862	0.0508979	0.00616698	0.0337676	FALSE	TRUE	FALSE	lEUfUH	18418068	0.760974	0.167316	outcome	TRUE	reported	textfile	345727	0.101513	1.8105e-16	7388	exposure	TRUE	reported	US4l0b	textfile	2	1	TRUE	0.00909351157000365	67.7810441653919	160.619727970302	NA	NA	0.00909595153681369	7388	2.67666413545834e-07	345727	TRUE	5.94093494595791e-16
rs11781440	T	C	T	C	-0.12561	0.0856167	0.802715	0.802013	FALSE	FALSE	FALSE	lEUfUH	17783401	0.239058	0.0727202	outcome	TRUE	reported	textfile	345727	0.0202292	5.32037e-10	7388	exposure	TRUE	reported	US4l0b	textfile	2	1	TRUE	0.0051916279238451	38.545477623488	160.619727970302	NA	NA	0.00519302642578467	7388	4.00935316629495e-06	345727	TRUE	2.40100876583724e-09
rs117824460	G	A	G	A	0.290098	-0.229139	0.0273024	0.023389	FALSE	FALSE	FALSE	lEUfUH	40865575	0.239382	0.194758	outcome	TRUE	reported	textfile	345727	0.0494094	4.32354e-09	7388	exposure	TRUE	reported	US4l0b	textfile	2	1	TRUE	0.00464431559264848	34.4629718849962	160.619727970302	NA	NA	0.00464556735005757	7388	4.00382318944771e-06	345727	TRUE	1.75525046755692e-08
rs117926876	T	C	T	C	0.138217	0.0314562	0.121349	0.127421	FALSE	FALSE	FALSE	lEUfUH	18467415	0.718358	0.0872199	outcome	TRUE	reported	textfile	345727	0.0250097	3.26577e-08	7388	exposure	TRUE	reported	US4l0b	textfile	2	1	TRUE	0.00411706160479777	30.5343287254602	160.619727970302	NA	NA	0.0041181718422301	7388	3.7622737925499e-07	345727	TRUE	6.22724387071631e-08
rs118053387	A	G	A	G	-0.635948	-0.217062	0.00884046	0.00543405	FALSE	FALSE	FALSE	lEUfUH	18132534	0.582834	0.395197	outcome	TRUE	reported	textfile	345727	0.0867748	2.32371e-13	7388	exposure	TRUE	reported	US4l0b	textfile	2	1	TRUE	0.00721744064961327	53.6955611638917	160.619727970302	NA	NA	0.00721938089743251	7388	8.72587842905862e-07	345727	TRUE	7.8933943826731e-13
rs11990818	G	A	G	A	0.098838	-0.0580993	0.375069	0.305318	FALSE	FALSE	FALSE	lEUfUH	18658392	0.357045	0.0630822	outcome	TRUE	reported	textfile	345727	0.0168429	4.40477e-09	7388	exposure	TRUE	reported	US4l0b	textfile	2	1	TRUE	0.00463946271611901	34.4267934458827	160.619727970302	NA	NA	0.00464071317165662	7388	2.45355776352741e-06	345727	TRUE	1.4409412345649e-08
rs11993004	C	G	C	G	-0.112815	0.0836687	0.449409	0.420339	FALSE	TRUE	TRUE	lEUfUH	17996880	0.155661	0.0589292	outcome	TRUE	reported	textfile	345727	0.0166878	1.37682e-11	7388	exposure	TRUE	reported	US4l0b	textfile	2	1	FALSE	0.0061479506667564	45.689661408986	160.619727970302	NA	NA	0.00614960518698317	7388	5.83084684370344e-06	345727	TRUE	9.38129471807347e-11
rs12544042	G	C	G	C	-0.236498	-0.0279881	0.184157	0.149247	FALSE	TRUE	FALSE	lEUfUH	18489427	0.72974	0.0810142	outcome	TRUE	reported	textfile	345727	0.0208883	1.0208e-29	7388	exposure	TRUE	reported	US4l0b	textfile	2	1	TRUE	0.0170549752810018	128.153705708507	160.619727970302	NA	NA	0.0170595146868181	7388	3.45218135890126e-07	345727	TRUE	1.00117125302043e-28
rs12545164	C	G	C	G	-0.287647	0.217179	0.138915	0.119929	FALSE	TRUE	FALSE	lEUfUH	18453614	0.0143853	0.0887352	outcome	TRUE	reported	textfile	345727	0.0232476	3.65089e-35	7388	exposure	TRUE	reported	US4l0b	textfile	2	1	TRUE	0.020301540197124	153.054416280422	160.619727970302	NA	NA	0.0203069258668574	7388	1.73262861682869e-05	345727	TRUE	2.24531674651288e-32
rs13266992	C	T	C	T	-0.801224	0.161144	0.179883	0.218795	FALSE	FALSE	FALSE	lEUfUH	18382187	0.0208439	0.0697354	outcome	TRUE	reported	textfile	345727	0.0189145	1e-200	7388	exposure	TRUE	reported	US4l0b	textfile	2	1	TRUE	0.195416924853599	1793.90972983872	160.619727970302	NA	NA	0.195459497512932	7388	1.54448677455955e-05	345727	TRUE	0
rs138280007	A	G	A	G	0.376128	-0.101525	0.0152112	0.0158532	FALSE	FALSE	FALSE	lEUfUH	18412089	0.671314	0.239251	outcome	TRUE	reported	textfile	345727	0.0662928	1.39713e-08	7388	exposure	TRUE	reported	US4l0b	textfile	2	1	TRUE	0.00433833916743444	32.1825920904463	160.619727970302	NA	NA	0.00433950881620411	7388	5.20843755243148e-07	345727	TRUE	2.88499600242e-08
rs141284197	A	T	A	T	0.48789	0.0475279	0.00949065	0.0162737	FALSE	TRUE	FALSE	lEUfUH	18418217	0.832676	0.224962	outcome	TRUE	reported	textfile	345727	0.0838083	5.83207e-09	7388	exposure	TRUE	reported	US4l0b	textfile	2	1	TRUE	0.00456620353138448	33.8806853880705	160.619727970302	NA	NA	0.00456743433227715	7388	1.29106492035056e-07	345727	TRUE	1.0345631296379e-08
rs141778676	T	G	T	G	0.406256	-0.0996609	0.0312245	0.0271789	FALSE	FALSE	FALSE	lEUfUH	18356399	0.576533	0.178458	outcome	TRUE	reported	textfile	345727	0.0469564	5.07081e-18	7388	exposure	TRUE	reported	US4l0b	textfile	2	1	TRUE	0.0100300961040434	74.8328707094212	160.619727970302	NA	NA	0.0100327848303656	7388	9.02082773725524e-07	345727	TRUE	2.55966514613888e-17
rs142412049	T	C	T	C	-0.39275	-0.280622	0.0130969	0.0053053	FALSE	FALSE	FALSE	lEUfUH	18568607	0.473002	0.391055	outcome	TRUE	reported	textfile	345727	0.0717319	4.36904e-08	7388	exposure	TRUE	reported	US4l0b	textfile	2	1	TRUE	0.00404130992320319	29.9702340972367	160.619727970302	NA	NA	0.00404239981579261	7388	1.4894856128351e-06	345727	TRUE	1.09692282101937e-07
rs180747008	G	C	G	C	-0.647985	0.193648	0.00687355	0.0138501	FALSE	TRUE	FALSE	lEUfUH	18327528	0.434278	0.247667	outcome	TRUE	reported	textfile	345727	0.0987122	5.22459e-11	7388	exposure	TRUE	reported	US4l0b	textfile	2	1	TRUE	0.00579876693243126	43.0795005461701	160.619727970302	NA	NA	0.0058003280296915	7388	1.76830913921141e-06	345727	TRUE	1.82288785855003e-10
rs186691992	G	A	G	A	-0.65525	0.0536226	0.0104223	0.0115463	FALSE	FALSE	FALSE	lEUfUH	18459792	0.847234	0.278344	outcome	TRUE	reported	textfile	345727	0.0803658	3.53972e-16	7388	exposure	TRUE	reported	US4l0b	textfile	2	1	TRUE	0.00891773031922385	66.4590197532266	160.619727970302	NA	NA	0.00892012354507357	7388	1.0734978415579e-07	345727	TRUE	9.97435850112843e-16
rs1907953	A	G	A	G	0.545604	-0.00692612	0.704642	0.668647	FALSE	FALSE	FALSE	lEUfUH	18353861	0.910875	0.0618766	outcome	TRUE	reported	textfile	345727	0.0167459	1e-200	7388	exposure	TRUE	reported	US4l0b	textfile	2	1	TRUE	0.125633315012206	1061.25688525416	160.619727970302	NA	NA	0.125663059352388	7388	3.624068003597e-08	345727	TRUE	1.03891144278168e-217
rs1961352	A	C	A	C	0.385367	-0.14154	0.0402291	0.0287504	FALSE	FALSE	FALSE	lEUfUH	18432529	0.421124	0.175941	outcome	TRUE	reported	textfile	345727	0.0415086	1.63182e-20	7388	exposure	TRUE	reported	US4l0b	textfile	2	1	TRUE	0.0115321041113337	86.1698405386594	160.619727970302	NA	NA	0.0115351907831697	7388	1.87194322272273e-06	345727	TRUE	1.40765868064159e-19
rs202166718	GA	G	GA	G	0.397848	0.211404	0.0176853	0.014725	FALSE	FALSE	FALSE	lEUfUH	18552665	0.363756	0.232764	outcome	TRUE	reported	textfile	345727	0.0616088	1.0634e-10	7388	exposure	TRUE	reported	US4l0b	textfile	2	1	TRUE	0.00561277339724888	41.6899405010575	160.619727970302	NA	NA	0.00561428470558612	7388	2.38595888483006e-06	345727	TRUE	4.0526088259064e-10
rs2552	C	T	C	T	0.231067	-0.16041	0.0484047	0.0314413	FALSE	FALSE	FALSE	lEUfUH	18401024	0.332591	0.165557	outcome	TRUE	reported	textfile	345727	0.0379283	1.11373e-09	7388	exposure	TRUE	reported	US4l0b	textfile	2	1	TRUE	0.00499857156382665	37.1049211742834	160.619727970302	NA	NA	0.00499991832231955	7388	2.7154125247945e-06	345727	TRUE	4.0388132702252e-09
rs2604911	G	C	G	C	-0.119741	0.0647436	0.206656	0.289532	FALSE	TRUE	FALSE	lEUfUH	40790212	0.308898	0.0636278	outcome	TRUE	reported	textfile	345727	0.0201342	2.72838e-09	7388	exposure	TRUE	reported	US4l0b	textfile	2	1	TRUE	0.00476448521423161	35.3589550106536	160.619727970302	NA	NA	0.00476576920523549	7388	2.99479974820395e-06	345727	TRUE	9.90262252198519e-09
rs2739714	C	A	C	A	0.112799	-0.0101147	0.226327	0.277603	FALSE	FALSE	FALSE	lEUfUH	18137159	0.875833	0.0647327	outcome	TRUE	reported	textfile	345727	0.0193834	5.90787e-09	7388	exposure	TRUE	reported	US4l0b	textfile	2	1	TRUE	0.00456286410758278	33.8557936844429	160.619727970302	NA	NA	0.00456409401247496	7388	7.06200064392724e-08	345727	TRUE	9.99533474394008e-09
rs28359501	T	A	T	A	0.19914	-0.0400715	0.093643	0.0749765	FALSE	TRUE	FALSE	lEUfUH	18216734	0.716635	0.110402	outcome	TRUE	reported	textfile	345727	0.028182	1.59208e-12	7388	exposure	TRUE	reported	US4l0b	textfile	2	1	TRUE	0.00671307065745908	49.9178418755713	160.619727970302	NA	NA	0.00671487623374363	7388	3.81053861229588e-07	345727	TRUE	4.17543051397552e-12
rs28383685	T	C	T	C	0.202375	-0.0753533	0.12299	0.1402	FALSE	FALSE	FALSE	lEUfUH	18197319	0.369238	0.0839214	outcome	TRUE	reported	textfile	345727	0.0249078	4.47564e-16	7388	exposure	TRUE	reported	US4l0b	textfile	2	1	TRUE	0.00885630813278304	65.9971832595781	160.619727970302	NA	NA	0.00885868502227358	7388	2.33199338554217e-06	345727	TRUE	2.85173598303673e-15
rs28427014	T	C	T	C	-0.809413	0.11057	0.0354913	0.057557	FALSE	FALSE	FALSE	lEUfUH	18358114	0.372376	0.123953	outcome	TRUE	reported	textfile	345727	0.0429976	4.74533e-79	7388	exposure	TRUE	reported	US4l0b	textfile	2	1	TRUE	0.045769717133474	354.26996692278	160.619727970302	NA	NA	0.0457815433746988	7388	2.30159417441802e-06	345727	TRUE	3.26219379610064e-75
rs34626279	A	C	A	C	0.127102	0.042529	0.426964	0.407891	FALSE	FALSE	FALSE	lEUfUH	18518453	0.473155	0.0592858	outcome	TRUE	reported	textfile	345727	0.0166302	2.12525e-14	7388	exposure	TRUE	reported	US4l0b	textfile	2	1	TRUE	0.00784445366555813	58.3972291319348	160.619727970302	NA	NA	0.00784656113961182	7388	1.48846127885762e-06	345727	TRUE	9.45419924369296e-14
rs3887027	T	C	T	C	0.180974	-0.0175884	0.386789	0.408705	FALSE	FALSE	FALSE	lEUfUH	18155109	0.765145	0.0588771	outcome	TRUE	reported	textfile	345727	0.0166667	1.81929e-27	7388	exposure	TRUE	reported	US4l0b	textfile	2	1	TRUE	0.0157083314700312	117.873329570012	160.619727970302	NA	NA	0.0157125181784055	7388	2.58124334418208e-07	345727	TRUE	1.37689045531151e-26
rs45528745	G	C	G	C	-0.823924	-0.00158399	0.00848378	0.010058	FALSE	TRUE	FALSE	lEUfUH	18402649	0.995875	0.306389	outcome	TRUE	reported	textfile	345727	0.0871933	3.40819e-21	7388	exposure	TRUE	reported	US4l0b	textfile	2	1	TRUE	0.0119416349339058	89.2669084542671	160.619727970302	NA	NA	0.0119448298957622	7388	7.73085890891850e-11	345727	TRUE	1.0592738111266e-20
rs4803380	T	C	T	C	0.298657	0.0256022	0.0261265	0.023903	FALSE	FALSE	FALSE	lEUfUH	40845264	0.894831	0.193671	outcome	TRUE	reported	textfile	345727	0.0506427	3.69403e-09	7388	exposure	TRUE	reported	US4l0b	textfile	2	1	TRUE	0.0046853839735213	34.7691528600116	160.619727970302	NA	NA	0.004686646747752	7388	5.05469056708555e-08	345727	TRUE	6.20049063665584e-09
rs4921886	C	A	C	A	0.233528	-0.0261642	0.554851	0.495738	FALSE	FALSE	FALSE	lEUfUH	18247481	0.650275	0.0577089	outcome	TRUE	reported	textfile	345727	0.0161302	1.67689e-47	7388	exposure	TRUE	reported	US4l0b	textfile	2	1	TRUE	0.0275881001176133	209.546702887261	160.619727970302	NA	NA	0.0275953643462738	7388	5.94563554734088e-07	345727	TRUE	1.02606016262687e-45
rs56113850	C	T	C	T	-0.162491	-0.0251163	0.576193	0.564014	FALSE	FALSE	FALSE	lEUfUH	40847202	0.673206	0.0595524	outcome	TRUE	reported	textfile	345727	0.016193	1.07351e-23	7388	exposure	TRUE	reported	US4l0b	textfile	2	1	TRUE	0.0134461484203237	100.666833415621	160.619727970302	NA	NA	0.0134497404325669	7388	5.14495733704747e-07	345727	TRUE	7.19891073061312e-23
rs62492998	G	A	G	A	-0.778816	0.322763	0.00991983	0.0145906	FALSE	FALSE	FALSE	lEUfUH	18398317	0.189925	0.246233	outcome	TRUE	reported	textfile	345727	0.0820981	2.39115e-21	7388	exposure	TRUE	reported	US4l0b	textfile	2	1	TRUE	0.0120342360518914	89.9675583130209	160.619727970302	NA	NA	0.0120374554871665	7388	4.96983568925254e-06	345727	TRUE	4.4110875810194e-20
rs62494914	T	C	T	C	-0.179588	-0.0763415	0.185603	0.226065	FALSE	FALSE	FALSE	lEUfUH	18499921	0.272558	0.0695791	outcome	TRUE	reported	textfile	345727	0.0208228	6.43235e-18	7388	exposure	TRUE	reported	US4l0b	textfile	2	1	TRUE	0.00996778840898765	74.3633230584183	160.619727970302	NA	NA	0.00997046060096365	7388	3.48202164628994e-06	345727	TRUE	6.2500136891701e-17
rs6586734	T	C	T	C	0.138629	-0.112517	0.753104	0.710188	FALSE	FALSE	FALSE	lEUfUH	18336878	0.0789496	0.0640462	outcome	TRUE	reported	textfile	345727	0.0192371	5.74851e-13	7388	exposure	TRUE	reported	US4l0b	textfile	2	1	TRUE	0.00698007440379941	51.9172155740071	160.619727970302	NA	NA	0.0069819512897632	7388	8.92719233441581e-06	345727	TRUE	6.52436073369895e-12
rs6586735	G	A	G	A	-0.518646	-0.102679	0.0282916	0.00653317	FALSE	FALSE	FALSE	lEUfUH	18337017	0.762614	0.339941	outcome	TRUE	reported	textfile	345727	0.048881	2.66664e-26	7388	exposure	TRUE	reported	US4l0b	textfile	2	1	TRUE	0.0150095283024744	112.549693857464	160.619727970302	NA	NA	0.015013531601222	7388	2.63891417281086e-07	345727	TRUE	1.8481410014724e-25
rs71502542	C	T	C	T	-0.434116	0.0942913	0.0976747	0.102095	FALSE	FALSE	FALSE	lEUfUH	18136255	0.321707	0.0951518	outcome	TRUE	reported	textfile	345727	0.0270756	7.45627e-58	7388	exposure	TRUE	reported	US4l0b	textfile	2	1	TRUE	0.0336258913568045	257.002781159008	160.619727970302	NA	NA	0.0336346904076876	7388	2.84038500574416e-06	345727	TRUE	4.55295126520996e-55
rs73206155	A	G	A	G	-0.84421	0.510644	0.0142857	0.0149492	FALSE	FALSE	FALSE	lEUfUH	18353701	0.0302796	0.235709	outcome	TRUE	reported	textfile	345727	0.0684775	6.37965e-35	7388	exposure	TRUE	reported	US4l0b	textfile	2	1	TRUE	0.0201574048958673	151.945417870973	160.619727970302	NA	NA	0.0201627531157746	7388	1.35752380836816e-05	345727	TRUE	2.33637361171466e-32
rs73592140	G	A	G	A	0.356931	0.0291198	0.0509424	0.0438529	FALSE	FALSE	FALSE	lEUfUH	18376394	0.837629	0.142098	outcome	TRUE	reported	textfile	345727	0.0367438	2.62679e-22	7388	exposure	TRUE	reported	US4l0b	textfile	2	1	TRUE	0.0126113518822624	94.3371641753803	160.619727970302	NA	NA	0.0126147237379792	7388	1.2147027281705e-07	345727	TRUE	1.1629351406579e-21
rs7461831	T	C	T	C	-0.163331	0.0321593	0.904833	0.854834	FALSE	FALSE	FALSE	lEUfUH	18049929	0.697593	0.0827628	outcome	TRUE	reported	textfile	345727	0.0276972	3.70146e-09	7388	exposure	TRUE	reported	US4l0b	textfile	2	1	TRUE	0.00468488806992251	34.7654555524106	160.619727970302	NA	NA	0.00468615071112976	7388	4.36728816623636e-07	345727	TRUE	7.74701059221483e-09
rs76749707	C	G	C	G	0.185143	0.0912467	0.0651301	0.0397906	FALSE	TRUE	FALSE	lEUfUH	18440163	0.533062	0.146384	outcome	TRUE	reported	textfile	345727	0.0326397	1.40871e-08	7388	exposure	TRUE	reported	US4l0b	textfile	2	1	TRUE	0.00433618809140655	32.1665655214845	160.619727970302	NA	NA	0.00433735716275639	7388	1.12386938222868e-06	345727	TRUE	3.4267730180219e-08
rs78344578	T	C	T	C	-0.82182	-0.438362	0.034397	0.026619	FALSE	FALSE	FALSE	lEUfUH	18381318	0.0136229	0.177686	outcome	TRUE	reported	textfile	345727	0.0442791	6.76858e-77	7388	exposure	TRUE	reported	US4l0b	textfile	2	1	TRUE	0.0445489426703818	344.380267350446	160.619727970302	NA	NA	0.0445604682108439	7388	1.76043886134913e-05	345727	TRUE	2.13004450880745e-71
rs7835402	T	C	T	C	-0.217899	0.0524318	0.137367	0.194482	FALSE	FALSE	FALSE	lEUfUH	18287754	0.475207	0.0734305	outcome	TRUE	reported	textfile	345727	0.0233208	9.31544e-21	7388	exposure	TRUE	reported	US4l0b	textfile	2	1	TRUE	0.0116787093387778	87.2782444244444	160.619727970302	NA	NA	0.0116818347870815	7388	1.47470495105891e-06	345727	TRUE	7.2856453384676e-20
rs78524955	G	A	G	A	-0.491161	-0.0258971	0.014096	0.073412	FALSE	FALSE	FALSE	lEUfUH	18598555	0.817975	0.112522	outcome	TRUE	reported	textfile	345727	0.0689193	1.02869e-12	7388	exposure	TRUE	reported	US4l0b	textfile	2	1	TRUE	0.00682753317250553	50.7748268266128	160.619727970302	NA	NA	0.00682936932344701	7388	1.53213322327231e-07	345727	TRUE	2.38530416002616e-12
rs79368844	T	G	T	G	0.279354	0.0407562	0.120429	0.134845	FALSE	FALSE	FALSE	lEUfUH	18437416	0.634636	0.0857641	outcome	TRUE	reported	textfile	345727	0.0251754	1.30765e-28	7388	exposure	TRUE	reported	US4l0b	textfile	2	1	TRUE	0.0163927517891667	123.094726004737	160.619727970302	NA	NA	0.0163971178757916	7388	6.53198579287088e-07	345727	TRUE	1.43696569817083e-27
rs79782859	C	G	C	G	0.414151	0.0210984	0.0172157	0.0306434	FALSE	TRUE	FALSE	lEUfUH	18374411	0.900143	0.16814	outcome	TRUE	reported	textfile	345727	0.0623988	3.19765e-11	7388	exposure	TRUE	reported	US4l0b	textfile	2	1	TRUE	0.00592729056401824	44.0400060179482	160.619727970302	NA	NA	0.00592888605503737	7388	4.55434737172026e-08	345727	TRUE	6.05843169406974e-11
Characteristics of significant SNPs with genome-wide associations (P<5×10-8) for DPF2 on Plasma metabolites
Butyrylglycine levels
SNP	effect_allele.exposure	other_allele.exposure	effect_allele.outcome	other_allele.outcome	beta.exposure	beta.outcome	eaf.exposure	eaf.outcome	remove	palindromic	ambiguous	id.outcome	se.outcome	pval.outcome	outcome	mr_keep.outcome	pval_origin.outcome	data_source.outcome	samplesize.outcome	chr.exposure	pos.exposure	gene.exposure	pval.exposure	samplesize.exposure	se.exposure	exposure	mr_keep.exposure	pval_origin.exposure	id.exposure	data_source.exposure	action	SNP_index	mr_keep	R2	f	meanf	units.outcome	units.exposure	rsq.exposure	effective_n.exposure	rsq.outcome	effective_n.outcome	steiger_dir	steiger_pval
rs1078457	T	C	T	C	-0.0653946	0.0130828	0.199425006576722	0.198391	FALSE	FALSE	FALSE	whcGlf	0.0228325	0.566651	outcome	TRUE	reported	textfile	6044	11	65380124	DPF2	4.781e-11	31684	0.00994200969041249	exposure	TRUE	reported	7d6cZd	textfile	2	1	TRUE	0.00136364801703067	43.2620907398157	133.011259152442	NA	NA	0.00136373398309114	31684	5.43363113010853e-05	6044	TRUE	0.0351580546718539
rs10791813	G	C	G	C	0.0437792166689973	-0.00870237	0.435416902578039	0.455005	FALSE	TRUE	TRUE	whcGlf	0.0178976	0.626803	outcome	TRUE	reported	textfile	6044	11	64865261	DPF2	4.9249e-08	31568	0.00802684524834478	exposure	TRUE	reported	7d6cZd	textfile	2	1	FALSE	0.000941434419843351	29.7453221668925	133.011259152442	NA	NA	0.000941494012320382	31568	3.91280116376339e-05	6044	TRUE	0.0818261403294702
rs111295021	A	C	A	C	0.0899297425264563	-0.0445118	0.0908027883966719	0.0873852	FALSE	FALSE	FALSE	whcGlf	0.0320277	0.164593	outcome	TRUE	reported	textfile	6044	11	65251405	DPF2	1.5526e-09	27310	0.0148917422918837	exposure	TRUE	reported	7d6cZd	textfile	2	1	TRUE	0.00133356573844614	36.4656425169782	133.011259152442	NA	NA	0.00133366327669213	27310	0.000319579766661761	6044	TRUE	0.189456680637709
rs1144924	T	C	T	C	-0.129446	0.0430314	0.819872783346184	0.196985	FALSE	FALSE	FALSE	whcGlf	0.0224412	0.055172	outcome	TRUE	reported	textfile	6044	11	65203561	DPF2	2.9752e-35	31015	0.0104480731701604	exposure	TRUE	reported	7d6cZd	textfile	2	1	TRUE	0.00492483474267193	153.489811832443	133.011259152442	NA	NA	0.00492515077654089	31015	0.000608182427246258	6044	TRUE	0.00117665784628989
rs117789850	T	C	T	C	-0.101189	0.0034901	0.942533303057826	0.050839	FALSE	FALSE	FALSE	whcGlf	0.0408009	0.931832	outcome	TRUE	reported	textfile	6044	11	65215402	DPF2	3.4004e-09	31499	0.017119069260196	exposure	TRUE	reported	7d6cZd	textfile	2	1	TRUE	0.00110797255932383	34.9365204069519	133.011259152442	NA	NA	0.00110804283553289	31499	1.21103029794344e-06	6044	TRUE	0.021880799033764
rs12417665	T	C	T	C	0.122923688868673	-0.0169716	0.143835353690348	0.150917	FALSE	FALSE	FALSE	whcGlf	0.0253915	0.503879	outcome	TRUE	reported	textfile	6044	11	65164357	DPF2	5.0035e-27	31143	0.011418086038871	exposure	TRUE	reported	7d6cZd	textfile	2	1	TRUE	0.00370775348430966	115.892853385835	133.011259152442	NA	NA	0.00370799072814696	31143	7.39360130208903e-05	6044	TRUE	0.000195258412774586
rs186869143	A	G	A	G	-0.401271	-0.121014	0.0265486725663717	0.00481088	FALSE	FALSE	FALSE	whcGlf	0.130283	0.352964	outcome	TRUE	reported	textfile	6044	11	65355791	DPF2	1.5603e-08	3842	0.070962318337875	exposure	TRUE	reported	7d6cZd	textfile	2	1	TRUE	0.00825395798185474	31.9589867843832	133.011259152442	NA	NA	0.00825822141673458	3842	0.000142775273247185	6044	TRUE	0.000125036617623544
rs2271448	T	C	T	C	0.0606954314070514	-0.0252929	0.325246185071037	0.300883	FALSE	FALSE	FALSE	whcGlf	0.0197014	0.199209	outcome	TRUE	reported	textfile	6044	11	64977424	DPF2	8.2342e-13	31681	0.00848021340548131	exposure	TRUE	reported	7d6cZd	textfile	2	1	TRUE	0.00161435071612055	51.2237093678833	133.011259152442	NA	NA	0.0016144524708744	31681	0.00027271178270769	6044	TRUE	0.0915755123237301
rs500464	G	A	G	A	-0.121266	0.0373361	0.922394678492239	0.0790613	FALSE	FALSE	FALSE	whcGlf	0.033365	0.263131	outcome	TRUE	reported	textfile	6044	11	64793960	DPF2	3.1511e-16	31684	0.0148477571034593	exposure	TRUE	reported	7d6cZd	textfile	2	1	TRUE	0.00210089160957776	66.7005786607049	133.011259152442	NA	NA	0.0021010239546056	31684	0.000207207239333844	6044	TRUE	0.0249732888759606
rs56205242	A	G	A	G	0.172905572353062	-0.0463639	0.10460124029663	0.130002	FALSE	FALSE	FALSE	whcGlf	0.0270141	0.0861101	outcome	TRUE	reported	textfile	6044	11	65077651	DPF2	3.8759e-36	28134	0.0137750314571316	exposure	TRUE	reported	7d6cZd	textfile	2	1	TRUE	0.005568983861649	157.544014067752	133.011259152442	NA	NA	0.00556937757472221	28134	0.000487288896037527	6044	TRUE	0.000202699200626584
rs566908	T	C	T	C	0.105573316705821	0.0120182	0.457745149845248	0.475141	FALSE	FALSE	FALSE	whcGlf	0.0183552	0.512623	outcome	TRUE	reported	textfile	6044	11	64837370	DPF2	7.0561e-40	31569	0.00798805398639725	exposure	TRUE	reported	7d6cZd	textfile	2	1	TRUE	0.00550261551963827	174.662162836338	133.011259152442	NA	NA	0.00550296223201729	31569	7.09494571768337e-05	6044	TRUE	2.70187844578275e-06
rs629710	A	C	A	C	-0.286303	0.028919	0.740101843445308	0.271907	FALSE	FALSE	FALSE	whcGlf	0.0201467	0.151168	outcome	TRUE	reported	textfile	6044	11	65109233	DPF2	1e-200	30408	0.00924578374710192	exposure	TRUE	reported	7d6cZd	textfile	2	1	TRUE	0.0305698477538163	958.817701975595	133.011259152442	NA	NA	0.0305717970580702	30408	0.000340902279615828	6044	TRUE	2.88625439955115e-29
rs658794	T	G	T	G	0.0874474678796026	-0.0137285	0.0856532493816056	0.0786811	FALSE	FALSE	FALSE	whcGlf	0.0337478	0.684158	outcome	TRUE	reported	textfile	6044	11	65121203	DPF2	1.069e-08	27310	0.0152896226666438	exposure	TRUE	reported	7d6cZd	textfile	2	1	TRUE	0.00119635305066583	32.7091407879488	133.011259152442	NA	NA	0.00119644056507079	27310	2.7388145545925e-05	6044	TRUE	0.0388599286716498
rs675671	G	A	G	A	-0.232143	0.019214	0.100076103500761	0.094299	FALSE	FALSE	FALSE	whcGlf	0.03031	0.526136	outcome	TRUE	reported	textfile	6044	11	65027156	DPF2	2.009e-57	26280	0.0145346385400426	exposure	TRUE	reported	7d6cZd	textfile	2	1	TRUE	0.0096135023808561	255.075787252184	133.011259152442	NA	NA	0.0096142270232175	26280	6.65049689998662e-05	6044	TRUE	2.57358309099414e-10
rs7114754	C	T	C	T	-0.179387	-0.0107838	0.0780375061069563	0.076649	FALSE	FALSE	FALSE	whcGlf	0.0336495	0.74861	outcome	TRUE	reported	textfile	6044	11	64971396	DPF2	9.0577e-34	31684	0.0148100553593361	exposure	TRUE	reported	7d6cZd	textfile	2	1	TRUE	0.00460915399018544	146.703395256676	133.011259152442	NA	NA	0.00460944361258016	31684	1.69980191993658e-05	6044	TRUE	5.37172711547078e-06
rs71541906	A	G	A	G	-0.0699504	-0.0318835	0.134372474801174	0.157679	FALSE	FALSE	FALSE	whcGlf	0.024767	0.197976	outcome	TRUE	reported	textfile	6044	11	64608282	DPF2	1.1662e-08	28588	0.0122623138821015	exposure	TRUE	reported	7d6cZd	textfile	2	1	TRUE	0.0011369917810386	32.5390436779943	133.011259152442	NA	NA	0.00113707123944065	28588	0.000274211298739611	6044	TRUE	0.225243595554578
rs72932814	C	T	C	T	0.152715863002314	0.00827937	0.0326419265321481	0.037077	FALSE	FALSE	FALSE	whcGlf	0.0474091	0.861365	outcome	TRUE	reported	textfile	6044	11	64832009	DPF2	4.7243e-10	26336	0.0245204577643766	exposure	TRUE	reported	7d6cZd	textfile	2	1	TRUE	0.0014706934441187	38.786283890862	133.011259152442	NA	NA	0.00147080497524507	26336	5.04763854295218e-06	6044	TRUE	0.0113359568481411
rs78287937	G	T	G	T	0.100493705693143	-0.056825	0.0691757476837406	0.0830436	FALSE	FALSE	FALSE	whcGlf	0.0325766	0.0810977	outcome	TRUE	reported	textfile	6044	11	64773101	DPF2	6.4597e-09	25906	0.0173130684284854	exposure	TRUE	reported	7d6cZd	textfile	2	1	TRUE	0.00129886738685734	33.6896191367248	133.011259152442	NA	NA	0.00129896753974494	25906	0.000503347598798042	6044	TRUE	0.340541605798607
Mannonate levels
SNP	effect_allele.exposure	other_allele.exposure	effect_allele.outcome	other_allele.outcome	beta.exposure	beta.outcome	eaf.exposure	eaf.outcome	remove	palindromic	ambiguous	id.outcome	se.outcome	pval.outcome	outcome	mr_keep.outcome	pval_origin.outcome	data_source.outcome	samplesize.outcome	chr.exposure	pos.exposure	gene.exposure	pval.exposure	samplesize.exposure	se.exposure	exposure	mr_keep.exposure	pval_origin.exposure	id.exposure	data_source.exposure	action	SNP_index	mr_keep	R2	f	meanf	units.outcome	units.exposure	rsq.exposure	effective_n.exposure	rsq.outcome	effective_n.outcome	steiger_dir	steiger_pval
rs1078457	T	C	T	C	-0.0653946	-0.00284116	0.199425006576722	0.198042	FALSE	FALSE	FALSE	LPqWxm	0.0185217	0.878086	outcome	TRUE	reported	textfile	8166	11	65380124	DPF2	4.781e-11	31684	0.00994200969041249	exposure	TRUE	reported	jRsoqP	textfile	2	1	TRUE	0.00136364801703067	43.2620907398157	133.011259152442	NA	NA	0.00136373398309114	31684	2.88220883120023e-06	8166	TRUE	0.00451530337783422
rs10791813	G	C	G	C	0.0437792166689973	-0.00903947	0.435416902578039	0.455276	FALSE	TRUE	TRUE	LPqWxm	0.0145599	0.5347	outcome	TRUE	reported	textfile	8166	11	64865261	DPF2	4.9249e-08	31568	0.00802684524834478	exposure	TRUE	reported	jRsoqP	textfile	2	1	FALSE	0.000941434419843351	29.7453221668925	133.011259152442	NA	NA	0.000941494012320382	31568	4.72112665009047e-05	8166	TRUE	0.0550473494373836
rs111295021	A	C	A	C	0.0899297425264563	0.00879398	0.0908027883966719	0.0856298	FALSE	FALSE	FALSE	LPqWxm	0.0264143	0.73919	outcome	TRUE	reported	textfile	8166	11	65251405	DPF2	1.5526e-09	27310	0.0148917422918837	exposure	TRUE	reported	jRsoqP	textfile	2	1	TRUE	0.00133356573844614	36.4656425169782	133.011259152442	NA	NA	0.00133366327669213	27310	1.3576375547902e-05	8166	TRUE	0.00920806277354841
rs1144924	T	C	T	C	-0.129446	-0.0167266	0.819872783346184	0.201631	FALSE	FALSE	FALSE	LPqWxm	0.0181316	0.356263	outcome	TRUE	reported	textfile	8166	11	65203561	DPF2	2.9752e-35	31015	0.0104480731701604	exposure	TRUE	reported	jRsoqP	textfile	2	1	TRUE	0.00492483474267193	153.489811832443	133.011259152442	NA	NA	0.00492515077654089	31015	0.000104230499345596	8166	TRUE	1.36485114708107e-06
rs117789850	T	C	T	C	-0.101189	-0.0552008	0.942533303057826	0.05158	FALSE	FALSE	FALSE	LPqWxm	0.0330902	0.0952782	outcome	TRUE	reported	textfile	8166	11	65215402	DPF2	3.4004e-09	31499	0.017119069260196	exposure	TRUE	reported	jRsoqP	textfile	2	1	TRUE	0.00110797255932383	34.9365204069519	133.011259152442	NA	NA	0.00110804283553289	31499	0.00034075399061002	8166	TRUE	0.232207433623949
rs12417665	T	C	T	C	0.122923688868673	0.0240531	0.143835353690348	0.150808	FALSE	FALSE	FALSE	LPqWxm	0.0205015	0.240702	outcome	TRUE	reported	textfile	8166	11	65164357	DPF2	5.0035e-27	31143	0.011418086038871	exposure	TRUE	reported	jRsoqP	textfile	2	1	TRUE	0.00370775348430966	115.892853385835	133.011259152442	NA	NA	0.00370799072814696	31143	0.000168575565399413	8166	TRUE	0.000113869207472509
rs186869143	A	G	A	G	-0.401271	-0.00444301	0.0265486725663717	0.00564902	FALSE	FALSE	FALSE	LPqWxm	0.0979156	0.963808	outcome	TRUE	reported	textfile	8166	11	65355791	DPF2	1.5603e-08	3842	0.070962318337875	exposure	TRUE	reported	jRsoqP	textfile	2	1	TRUE	0.00825395798185474	31.9589867843832	133.011259152442	NA	NA	0.00825822141673458	3842	2.52201518354988e-07	8166	TRUE	3.64365142560874e-06
rs2271448	T	C	T	C	0.0606954314070514	0.0128618	0.325246185071037	0.298076	FALSE	FALSE	FALSE	LPqWxm	0.0161158	0.424819	outcome	TRUE	reported	textfile	8166	11	64977424	DPF2	8.2342e-13	31681	0.00848021340548131	exposure	TRUE	reported	jRsoqP	textfile	2	1	TRUE	0.00161435071612055	51.2237093678833	133.011259152442	NA	NA	0.0016144524708744	31681	7.80122651700584e-05	8166	TRUE	0.0114971028170253
rs500464	G	A	G	A	-0.121266	-0.0438683	0.922394678492239	0.0795049	FALSE	FALSE	FALSE	LPqWxm	0.027097	0.105462	outcome	TRUE	reported	textfile	8166	11	64793960	DPF2	3.1511e-16	31684	0.0148477571034593	exposure	TRUE	reported	jRsoqP	textfile	2	1	TRUE	0.00210089160957776	66.7005786607049	133.011259152442	NA	NA	0.0021010239546056	31684	0.000320934782781842	8166	TRUE	0.0243238621050136
rs56205242	A	G	A	G	0.172905572353062	-0.0123267	0.10460124029663	0.131191	FALSE	FALSE	FALSE	LPqWxm	0.0219896	0.575091	outcome	TRUE	reported	textfile	8166	11	65077651	DPF2	3.8759e-36	28134	0.0137750314571316	exposure	TRUE	reported	jRsoqP	textfile	2	1	TRUE	0.005568983861649	157.544014067752	133.011259152442	NA	NA	0.00556937757472221	28134	3.84892352511925e-05	8166	TRUE	4.93322456188136e-08
rs566908	T	C	T	C	0.105573316705821	0.0102555	0.457745149845248	0.474228	FALSE	FALSE	FALSE	LPqWxm	0.01489	0.490981	outcome	TRUE	reported	textfile	8166	11	64837370	DPF2	7.0561e-40	31569	0.00798805398639725	exposure	TRUE	reported	jRsoqP	textfile	2	1	TRUE	0.00550261551963827	174.662162836338	133.011259152442	NA	NA	0.00550296223201729	31569	5.81026649054355e-05	8166	TRUE	7.81706873399153e-08
rs629710	A	C	A	C	-0.286303	-0.0138379	0.740101843445308	0.273201	FALSE	FALSE	FALSE	LPqWxm	0.0163968	0.398703	outcome	TRUE	reported	textfile	8166	11	65109233	DPF2	1e-200	30408	0.00924578374710192	exposure	TRUE	reported	jRsoqP	textfile	2	1	TRUE	0.0305698477538163	958.817701975595	133.011259152442	NA	NA	0.0305717970580702	30408	8.72330976055419e-05	8166	TRUE	4.45262902855697e-41
rs658794	T	G	T	G	0.0874474678796026	-0.0256812	0.0856532493816056	0.0774701	FALSE	FALSE	FALSE	LPqWxm	0.0276152	0.352388	outcome	TRUE	reported	textfile	8166	11	65121203	DPF2	1.069e-08	27310	0.0152896226666438	exposure	TRUE	reported	jRsoqP	textfile	2	1	TRUE	0.00119635305066583	32.7091407879488	133.011259152442	NA	NA	0.00119644056507079	27310	0.000105921772727085	8166	TRUE	0.053948552531762
rs675671	G	A	G	A	-0.232143	-0.0325746	0.100076103500761	0.09237	FALSE	FALSE	FALSE	LPqWxm	0.0250139	0.192827	outcome	TRUE	reported	textfile	8166	11	65027156	DPF2	2.009e-57	26280	0.0145346385400426	exposure	TRUE	reported	jRsoqP	textfile	2	1	TRUE	0.0096135023808561	255.075787252184	133.011259152442	NA	NA	0.0096142270232175	26280	0.000207683580810844	8166	TRUE	3.45565300562122e-11
rs7114754	C	T	C	T	-0.179387	-0.00759923	0.0780375061069563	0.0776306	FALSE	FALSE	FALSE	LPqWxm	0.0273314	0.780981	outcome	TRUE	reported	textfile	8166	11	64971396	DPF2	9.0577e-34	31684	0.0148100553593361	exposure	TRUE	reported	jRsoqP	textfile	2	1	TRUE	0.00460915399018544	146.703395256676	133.011259152442	NA	NA	0.00460944361258016	31684	9.46909150755555e-06	8166	TRUE	1.69271268403498e-07
rs71541906	A	G	A	G	-0.0699504	-0.0136829	0.134372474801174	0.158243	FALSE	FALSE	FALSE	LPqWxm	0.0201753	0.497643	outcome	TRUE	reported	textfile	8166	11	64608282	DPF2	1.1662e-08	28588	0.0122623138821015	exposure	TRUE	reported	jRsoqP	textfile	2	1	TRUE	0.0011369917810386	32.5390436779943	133.011259152442	NA	NA	0.00113707123944065	28588	5.63363674169234e-05	8166	TRUE	0.036623953982564
rs72932814	C	T	C	T	0.152715863002314	-0.0325678	0.0326419265321481	0.0388111	FALSE	FALSE	FALSE	LPqWxm	0.0379057	0.390242	outcome	TRUE	reported	textfile	8166	11	64832009	DPF2	4.7243e-10	26336	0.0245204577643766	exposure	TRUE	reported	jRsoqP	textfile	2	1	TRUE	0.0014706934441187	38.786283890862	133.011259152442	NA	NA	0.00147080497524507	26336	9.04118881929538e-05	8166	TRUE	0.0227110421647813
rs78287937	G	T	G	T	0.100493705693143	0.0280846	0.0691757476837406	0.0845692	FALSE	FALSE	FALSE	LPqWxm	0.0263022	0.285626	outcome	TRUE	reported	textfile	8166	11	64773101	DPF2	6.4597e-09	25906	0.0173130684284854	exposure	TRUE	reported	jRsoqP	textfile	2	1	TRUE	0.00129886738685734	33.6896191367248	133.011259152442	NA	NA	0.00129896753974494	25906	0.000139633200243093	8166	TRUE	0.0561719360238178
1-(1-enyl-palmitoyl)-2-palmitoleoyl-GPC (P-16:0/16:1) levels
SNP	effect_allele.exposure	other_allele.exposure	effect_allele.outcome	other_allele.outcome	beta.exposure	beta.outcome	eaf.exposure	eaf.outcome	remove	palindromic	ambiguous	id.outcome	se.outcome	pval.outcome	outcome	mr_keep.outcome	pval_origin.outcome	data_source.outcome	samplesize.outcome	chr.exposure	pos.exposure	gene.exposure	pval.exposure	samplesize.exposure	se.exposure	exposure	mr_keep.exposure	pval_origin.exposure	id.exposure	data_source.exposure	action	SNP_index	mr_keep	R2	f	meanf	units.outcome	units.exposure	rsq.exposure	effective_n.exposure	rsq.outcome	effective_n.outcome	steiger_dir	steiger_pval
rs1078457	T	C	T	C	-0.0653946	0.0293263	0.199425006576722	0.197433	FALSE	FALSE	FALSE	hY0fIN	0.018952	0.121768	outcome	TRUE	reported	textfile	8083	11	65380124	DPF2	4.781e-11	31684	0.00994200969041249	exposure	TRUE	reported	zQUzlc	textfile	2	1	TRUE	0.00136364801703067	43.2620907398157	133.011259152442	NA	NA	0.00136373398309114	31684	0.000296217477349713	8083	TRUE	0.113349627623397
rs10791813	G	C	G	C	0.0437792166689973	0.00124866	0.435416902578039	0.454444	FALSE	TRUE	TRUE	hY0fIN	0.014872	0.933088	outcome	TRUE	reported	textfile	8083	11	64865261	DPF2	4.9249e-08	31568	0.00802684524834478	exposure	TRUE	reported	zQUzlc	textfile	2	1	FALSE	0.000941434419843351	29.7453221668925	133.011259152442	NA	NA	0.000941494012320382	31568	8.7233673221058e-07	8083	TRUE	0.0169899449024031
rs111295021	A	C	A	C	0.0899297425264563	-0.00374104	0.0908027883966719	0.0857924	FALSE	FALSE	FALSE	hY0fIN	0.0269621	0.889646	outcome	TRUE	reported	textfile	8083	11	65251405	DPF2	1.5526e-09	27310	0.0148917422918837	exposure	TRUE	reported	zQUzlc	textfile	2	1	TRUE	0.00133356573844614	36.4656425169782	133.011259152442	NA	NA	0.00133366327669213	27310	2.38238053421032e-06	8083	TRUE	0.0057261615688893
rs1144924	T	C	T	C	-0.129446	0.0501946	0.819872783346184	0.200173	FALSE	FALSE	FALSE	hY0fIN	0.0186078	0.00698604	outcome	TRUE	reported	textfile	8083	11	65203561	DPF2	2.9752e-35	31015	0.0104480731701604	exposure	TRUE	reported	zQUzlc	textfile	2	1	TRUE	0.00492483474267193	153.489811832443	133.011259152442	NA	NA	0.00492515077654089	31015	0.000899638319712796	8083	TRUE	0.001255948516693
rs117789850	T	C	T	C	-0.101189	-0.043525	0.942533303057826	0.0511801	FALSE	FALSE	FALSE	hY0fIN	0.033906	0.199248	outcome	TRUE	reported	textfile	8083	11	65215402	DPF2	3.4004e-09	31499	0.017119069260196	exposure	TRUE	reported	zQUzlc	textfile	2	1	TRUE	0.00110797255932383	34.9365204069519	133.011259152442	NA	NA	0.00110804283553289	31499	0.000203878197470741	8083	TRUE	0.127207867352623
rs12417665	T	C	T	C	0.122923688868673	-0.0105706	0.143835353690348	0.151564	FALSE	FALSE	FALSE	hY0fIN	0.0209306	0.613538	outcome	TRUE	reported	textfile	8083	11	65164357	DPF2	5.0035e-27	31143	0.011418086038871	exposure	TRUE	reported	zQUzlc	textfile	2	1	TRUE	0.00370775348430966	115.892853385835	133.011259152442	NA	NA	0.00370799072814696	31143	3.1561461676118e-05	8083	TRUE	9.27704527933584e-06
rs186869143	A	G	A	G	-0.401271	0.163428	0.0265486725663717	0.0057072	FALSE	FALSE	FALSE	hY0fIN	0.0995198	0.100555	outcome	TRUE	reported	textfile	8083	11	65355791	DPF2	1.5603e-08	3842	0.070962318337875	exposure	TRUE	reported	zQUzlc	textfile	2	1	TRUE	0.00825395798185474	31.9589867843832	133.011259152442	NA	NA	0.00825822141673458	3842	0.000333598379133388	8083	TRUE	0.000201683284372776
rs2271448	T	C	T	C	0.0606954314070514	-0.0291583	0.325246185071037	0.299875	FALSE	FALSE	FALSE	hY0fIN	0.0164506	0.0763144	outcome	TRUE	reported	textfile	8083	11	64977424	DPF2	8.2342e-13	31681	0.00848021340548131	exposure	TRUE	reported	zQUzlc	textfile	2	1	TRUE	0.00161435071612055	51.2237093678833	133.011259152442	NA	NA	0.0016144524708744	31681	0.000388621656884841	8083	TRUE	0.100235267110988
rs500464	G	A	G	A	-0.121266	0.018652	0.922394678492239	0.0791962	FALSE	FALSE	FALSE	hY0fIN	0.0277822	0.501988	outcome	TRUE	reported	textfile	8083	11	64793960	DPF2	3.1511e-16	31684	0.0148477571034593	exposure	TRUE	reported	zQUzlc	textfile	2	1	TRUE	0.00210089160957776	66.7005786607049	133.011259152442	NA	NA	0.0021010239546056	31684	5.57735408613134e-05	8083	TRUE	0.00206185650855314
rs56205242	A	G	A	G	0.172905572353062	0.00363874	0.10460124029663	0.130751	FALSE	FALSE	FALSE	hY0fIN	0.0224998	0.871524	outcome	TRUE	reported	textfile	8083	11	65077651	DPF2	3.8759e-36	28134	0.0137750314571316	exposure	TRUE	reported	zQUzlc	textfile	2	1	TRUE	0.005568983861649	157.544014067752	133.011259152442	NA	NA	0.00556937757472221	28134	3.23651945593385e-06	8083	TRUE	7.42056699842669e-09
rs566908	T	C	T	C	0.105573316705821	0.0124683	0.457745149845248	0.474705	FALSE	FALSE	FALSE	hY0fIN	0.0152223	0.41274	outcome	TRUE	reported	textfile	8083	11	64837370	DPF2	7.0561e-40	31569	0.00798805398639725	exposure	TRUE	reported	zQUzlc	textfile	2	1	TRUE	0.00550261551963827	174.662162836338	133.011259152442	NA	NA	0.00550296223201729	31569	8.30142736337468e-05	8083	TRUE	1.69417756449114e-07
rs629710	A	C	A	C	-0.286303	0.0194509	0.740101843445308	0.271798	FALSE	FALSE	FALSE	hY0fIN	0.0167867	0.246573	outcome	TRUE	reported	textfile	8083	11	65109233	DPF2	1e-200	30408	0.00924578374710192	exposure	TRUE	reported	zQUzlc	textfile	2	1	TRUE	0.0305698477538163	958.817701975595	133.011259152442	NA	NA	0.0305717970580702	30408	0.000166116008801923	8083	TRUE	4.0064795728985e-39
rs658794	T	G	T	G	0.0874474678796026	0.0399901	0.0856532493816056	0.0770492	FALSE	FALSE	FALSE	hY0fIN	0.028264	0.157105	outcome	TRUE	reported	textfile	8083	11	65121203	DPF2	1.069e-08	27310	0.0152896226666438	exposure	TRUE	reported	zQUzlc	textfile	2	1	TRUE	0.00119635305066583	32.7091407879488	133.011259152442	NA	NA	0.00119644056507079	27310	0.000247665236796545	8083	TRUE	0.136328005610067
rs675671	G	A	G	A	-0.232143	0.060888	0.100076103500761	0.0920074	FALSE	FALSE	FALSE	hY0fIN	0.0256023	0.0173963	outcome	TRUE	reported	textfile	8083	11	65027156	DPF2	2.009e-57	26280	0.0145346385400426	exposure	TRUE	reported	zQUzlc	textfile	2	1	TRUE	0.0096135023808561	255.075787252184	133.011259152442	NA	NA	0.0096142270232175	26280	0.00069941748832207	8083	TRUE	1.57315939038539e-08
rs7114754	C	T	C	T	-0.179387	-0.0154422	0.0780375061069563	0.0765085	FALSE	FALSE	FALSE	hY0fIN	0.028188	0.583808	outcome	TRUE	reported	textfile	8083	11	64971396	DPF2	9.0577e-34	31684	0.0148100553593361	exposure	TRUE	reported	zQUzlc	textfile	2	1	TRUE	0.00460915399018544	146.703395256676	133.011259152442	NA	NA	0.00460944361258016	31684	3.71371511006845e-05	8083	TRUE	6.80097037483656e-07
rs71541906	A	G	A	G	-0.0699504	0.0351764	0.134372474801174	0.158322	FALSE	FALSE	FALSE	hY0fIN	0.020608	0.0878344	outcome	TRUE	reported	textfile	8083	11	64608282	DPF2	1.1662e-08	28588	0.0122623138821015	exposure	TRUE	reported	zQUzlc	textfile	2	1	TRUE	0.0011369917810386	32.5390436779943	133.011259152442	NA	NA	0.00113707123944065	28588	0.000360420452249671	8083	TRUE	0.241844057784202
rs72932814	C	T	C	T	0.152715863002314	-0.0472899	0.0326419265321481	0.0387765	FALSE	FALSE	FALSE	hY0fIN	0.0387972	0.222882	outcome	TRUE	reported	textfile	8083	11	64832009	DPF2	4.7243e-10	26336	0.0245204577643766	exposure	TRUE	reported	zQUzlc	textfile	2	1	TRUE	0.0014706934441187	38.786283890862	133.011259152442	NA	NA	0.00147080497524507	26336	0.000183819287431651	8083	TRUE	0.0510662695334478
rs78287937	G	T	G	T	0.100493705693143	-0.0145995	0.0691757476837406	0.084262	FALSE	FALSE	FALSE	hY0fIN	0.0269171	0.58755	outcome	TRUE	reported	textfile	8083	11	64773101	DPF2	6.4597e-09	25906	0.0173130684284854	exposure	TRUE	reported	zQUzlc	textfile	2	1	TRUE	0.00129886738685734	33.6896191367248	133.011259152442	NA	NA	0.00129896753974494	25906	3.64031120296662e-05	8083	TRUE	0.0184642616757441
Glycosyl-N-behenoyl-sphingadienine (d18:2/22:0) levels
SNP	effect_allele.exposure	other_allele.exposure	effect_allele.outcome	other_allele.outcome	beta.exposure	beta.outcome	eaf.exposure	eaf.outcome	remove	palindromic	ambiguous	id.outcome	se.outcome	pval.outcome	outcome	mr_keep.outcome	pval_origin.outcome	data_source.outcome	samplesize.outcome	chr.exposure	pos.exposure	gene.exposure	pval.exposure	samplesize.exposure	se.exposure	exposure	mr_keep.exposure	pval_origin.exposure	id.exposure	data_source.exposure	action	SNP_index	mr_keep	R2	f	meanf	units.outcome	units.exposure	rsq.exposure	effective_n.exposure	rsq.outcome	effective_n.outcome	steiger_dir	steiger_pval
rs1078457	T	C	T	C	-0.0653946	0.0381873	0.199425006576722	0.198266	FALSE	FALSE	FALSE	yeqnWb	0.0191991	0.0466993	outcome	TRUE	reported	textfile	8232	11	65380124	DPF2	4.781e-11	31684	0.00994200969041249	exposure	TRUE	reported	2Ff0Ah	textfile	2	1	TRUE	0.00136364801703067	43.2620907398157	133.011259152442	NA	NA	0.00136373398309114	31684	0.000480471479459245	8232	TRUE	0.224691470837474
rs10791813	G	C	G	C	0.0437792166689973	-0.0109962	0.435416902578039	0.454479	FALSE	TRUE	TRUE	yeqnWb	0.0150948	0.466321	outcome	TRUE	reported	textfile	8232	11	64865261	DPF2	4.9249e-08	31568	0.00802684524834478	exposure	TRUE	reported	2Ff0Ah	textfile	2	1	FALSE	0.000941434419843351	29.7453221668925	133.011259152442	NA	NA	0.000941494012320382	31568	6.44766843411631e-05	8232	TRUE	0.067096608386984
rs111295021	A	C	A	C	0.0899297425264563	-0.0594118	0.0908027883966719	0.0859658	FALSE	FALSE	FALSE	yeqnWb	0.0273196	0.0296531	outcome	TRUE	reported	textfile	8232	11	65251405	DPF2	1.5526e-09	27310	0.0148917422918837	exposure	TRUE	reported	2Ff0Ah	textfile	2	1	TRUE	0.00133356573844614	36.4656425169782	133.011259152442	NA	NA	0.00133366327669213	27310	0.000574311378791481	8232	TRUE	0.317666117615762
rs1144924	T	C	T	C	-0.129446	0.0520723	0.819872783346184	0.201228	FALSE	FALSE	FALSE	yeqnWb	0.0188202	0.00566035	outcome	TRUE	reported	textfile	8232	11	65203561	DPF2	2.9752e-35	31015	0.0104480731701604	exposure	TRUE	reported	2Ff0Ah	textfile	2	1	TRUE	0.00492483474267193	153.489811832443	133.011259152442	NA	NA	0.00492515077654089	31015	0.00092931176381903	8232	TRUE	0.00132883964210782
rs117789850	T	C	T	C	-0.101189	-0.0261578	0.942533303057826	0.0514087	FALSE	FALSE	FALSE	yeqnWb	0.0342869	0.445518	outcome	TRUE	reported	textfile	8232	11	65215402	DPF2	3.4004e-09	31499	0.017119069260196	exposure	TRUE	reported	2Ff0Ah	textfile	2	1	TRUE	0.00110797255932383	34.9365204069519	133.011259152442	NA	NA	0.00110804283553289	31499	7.07156341769791e-05	8232	TRUE	0.0443820918174407
rs12417665	T	C	T	C	0.122923688868673	-0.027979	0.143835353690348	0.150857	FALSE	FALSE	FALSE	yeqnWb	0.0212723	0.188417	outcome	TRUE	reported	textfile	8232	11	65164357	DPF2	5.0035e-27	31143	0.011418086038871	exposure	TRUE	reported	2Ff0Ah	textfile	2	1	TRUE	0.00370775348430966	115.892853385835	133.011259152442	NA	NA	0.00370799072814696	31143	0.000210157243429273	8232	TRUE	0.000177411729586737
rs186869143	A	G	A	G	-0.401271	0.182946	0.0265486725663717	0.00572542	FALSE	FALSE	FALSE	yeqnWb	0.100858	0.0696928	outcome	TRUE	reported	textfile	8232	11	65355791	DPF2	1.5603e-08	3842	0.070962318337875	exposure	TRUE	reported	2Ff0Ah	textfile	2	1	TRUE	0.00825395798185474	31.9589867843832	133.011259152442	NA	NA	0.00825822141673458	3842	0.000399624134251357	8232	TRUE	0.000273224052151687
rs2271448	T	C	T	C	0.0606954314070514	0.00298861	0.325246185071037	0.29918	FALSE	FALSE	FALSE	yeqnWb	0.0167006	0.857975	outcome	TRUE	reported	textfile	8232	11	64977424	DPF2	8.2342e-13	31681	0.00848021340548131	exposure	TRUE	reported	2Ff0Ah	textfile	2	1	TRUE	0.00161435071612055	51.2237093678833	133.011259152442	NA	NA	0.0016144524708744	31681	3.89110380576698e-06	8232	TRUE	0.00200320678153888
rs500464	G	A	G	A	-0.121266	0.00385452	0.922394678492239	0.0795968	FALSE	FALSE	FALSE	yeqnWb	0.0280767	0.890805	outcome	TRUE	reported	textfile	8232	11	64793960	DPF2	3.1511e-16	31684	0.0148477571034593	exposure	TRUE	reported	2Ff0Ah	textfile	2	1	TRUE	0.00210089160957776	66.7005786607049	133.011259152442	NA	NA	0.0021010239546056	31684	2.29006418085314e-06	8232	TRUE	0.000337151783121077
rs56205242	A	G	A	G	0.172905572353062	-0.012711	0.10460124029663	0.130319	FALSE	FALSE	FALSE	yeqnWb	0.0228478	0.577983	outcome	TRUE	reported	textfile	8232	11	65077651	DPF2	3.8759e-36	28134	0.0137750314571316	exposure	TRUE	reported	2Ff0Ah	textfile	2	1	TRUE	0.005568983861649	157.544014067752	133.011259152442	NA	NA	0.00556937757472221	28134	3.76057706444227e-05	8232	TRUE	4.33953186221111e-08
rs566908	T	C	T	C	0.105573316705821	0.00525762	0.457745149845248	0.474375	FALSE	FALSE	FALSE	yeqnWb	0.0154558	0.733728	outcome	TRUE	reported	textfile	8232	11	64837370	DPF2	7.0561e-40	31569	0.00798805398639725	exposure	TRUE	reported	2Ff0Ah	textfile	2	1	TRUE	0.00550261551963827	174.662162836338	133.011259152442	NA	NA	0.00550296223201729	31569	1.40601342534379e-05	8232	TRUE	1.18826283661987e-08
rs629710	A	C	A	C	-0.286303	0.0103628	0.740101843445308	0.273319	FALSE	FALSE	FALSE	yeqnWb	0.0169949	0.542022	outcome	TRUE	reported	textfile	8232	11	65109233	DPF2	1e-200	30408	0.00924578374710192	exposure	TRUE	reported	2Ff0Ah	textfile	2	1	TRUE	0.0305698477538163	958.817701975595	133.011259152442	NA	NA	0.0305717970580702	30408	4.51749365261812e-05	8232	TRUE	1.41108021705636e-42
rs658794	T	G	T	G	0.0874474678796026	-0.00550202	0.0856532493816056	0.0772896	FALSE	FALSE	FALSE	yeqnWb	0.0286762	0.847847	outcome	TRUE	reported	textfile	8232	11	65121203	DPF2	1.069e-08	27310	0.0152896226666438	exposure	TRUE	reported	2Ff0Ah	textfile	2	1	TRUE	0.00119635305066583	32.7091407879488	133.011259152442	NA	NA	0.00119644056507079	27310	4.47300465650046e-06	8232	TRUE	0.00978087682074173
rs675671	G	A	G	A	-0.232143	0.0297478	0.100076103500761	0.0924799	FALSE	FALSE	FALSE	yeqnWb	0.0259422	0.251509	outcome	TRUE	reported	textfile	8232	11	65027156	DPF2	2.009e-57	26280	0.0145346385400426	exposure	TRUE	reported	2Ff0Ah	textfile	2	1	TRUE	0.0096135023808561	255.075787252184	133.011259152442	NA	NA	0.0096142270232175	26280	0.000159744856130333	8232	TRUE	1.14965828123478e-11
rs7114754	C	T	C	T	-0.179387	-0.0272391	0.0780375061069563	0.0767032	FALSE	FALSE	FALSE	yeqnWb	0.0285309	0.339718	outcome	TRUE	reported	textfile	8232	11	64971396	DPF2	9.0577e-34	31684	0.0148100553593361	exposure	TRUE	reported	2Ff0Ah	textfile	2	1	TRUE	0.00460915399018544	146.703395256676	133.011259152442	NA	NA	0.00460944361258016	31684	0.000110740539024342	8232	TRUE	3.39793684252452e-06
rs71541906	A	G	A	G	-0.0699504	0.00869199	0.134372474801174	0.158227	FALSE	FALSE	FALSE	yeqnWb	0.0209414	0.678097	outcome	TRUE	reported	textfile	8232	11	64608282	DPF2	1.1662e-08	28588	0.0122623138821015	exposure	TRUE	reported	2Ff0Ah	textfile	2	1	TRUE	0.0011369917810386	32.5390436779943	133.011259152442	NA	NA	0.00113707123944065	28588	2.09323547007218e-05	8232	TRUE	0.0197668314519834
rs72932814	C	T	C	T	0.152715863002314	-0.0116796	0.0326419265321481	0.0387427	FALSE	FALSE	FALSE	yeqnWb	0.0393492	0.766605	outcome	TRUE	reported	textfile	8232	11	64832009	DPF2	4.7243e-10	26336	0.0245204577643766	exposure	TRUE	reported	2Ff0Ah	textfile	2	1	TRUE	0.0014706934441187	38.786283890862	133.011259152442	NA	NA	0.00147080497524507	26336	1.07048266796132e-05	8232	TRUE	0.00545063072467315
rs78287937	G	T	G	T	0.100493705693143	0.0229145	0.0691757476837406	0.0848024	FALSE	FALSE	FALSE	yeqnWb	0.0272602	0.400581	outcome	TRUE	reported	textfile	8232	11	64773101	DPF2	6.4597e-09	25906	0.0173130684284854	exposure	TRUE	reported	2Ff0Ah	textfile	2	1	TRUE	0.00129886738685734	33.6896191367248	133.011259152442	NA	NA	0.00129896753974494	25906	8.5847089398375e-05	8232	TRUE	0.0342438865704512
Glycosyl ceramide (d18:1/20:0, d16:1/22:0) levels
SNP	effect_allele.exposure	other_allele.exposure	effect_allele.outcome	other_allele.outcome	beta.exposure	beta.outcome	eaf.exposure	eaf.outcome	remove	palindromic	ambiguous	id.outcome	se.outcome	pval.outcome	outcome	mr_keep.outcome	pval_origin.outcome	data_source.outcome	samplesize.outcome	chr.exposure	pos.exposure	gene.exposure	pval.exposure	samplesize.exposure	se.exposure	exposure	mr_keep.exposure	pval_origin.exposure	id.exposure	data_source.exposure	action	SNP_index	mr_keep	R2	f	meanf	units.outcome	units.exposure	rsq.exposure	effective_n.exposure	rsq.outcome	effective_n.outcome	steiger_dir	steiger_pval
rs1078457	T	C	T	C	-0.0653946	0.040022	0.199425006576722	0.198199	FALSE	FALSE	FALSE	L3wNab	0.0192701	0.0378113	outcome	TRUE	reported	textfile	8259	11	65380124	DPF2	4.781e-11	31684	0.00994200969041249	exposure	TRUE	reported	GZNiJD	textfile	2	1	TRUE	0.00136364801703067	43.2620907398157	133.011259152442	NA	NA	0.00136373398309114	31684	0.000522132270268783	8259	TRUE	0.254127550158752
rs10791813	G	C	G	C	0.0437792166689973	-0.00737574	0.435416902578039	0.454386	FALSE	TRUE	TRUE	L3wNab	0.0151721	0.626869	outcome	TRUE	reported	textfile	8259	11	64865261	DPF2	4.9249e-08	31568	0.00802684524834478	exposure	TRUE	reported	GZNiJD	textfile	2	1	FALSE	0.000941434419843351	29.7453221668925	133.011259152442	NA	NA	0.000941494012320382	31568	2.86210189059669e-05	8259	TRUE	0.0403440130440124
rs111295021	A	C	A	C	0.0899297425264563	-0.0486231	0.0908027883966719	0.0860396	FALSE	FALSE	FALSE	L3wNab	0.0274283	0.076273	outcome	TRUE	reported	textfile	8259	11	65251405	DPF2	1.5526e-09	27310	0.0148917422918837	exposure	TRUE	reported	GZNiJD	textfile	2	1	TRUE	0.00133356573844614	36.4656425169782	133.011259152442	NA	NA	0.00133366327669213	27310	0.000380452079364462	8259	TRUE	0.175173422852162
rs1144924	T	C	T	C	-0.129446	0.0507939	0.819872783346184	0.201358	FALSE	FALSE	FALSE	L3wNab	0.0188836	0.00714859	outcome	TRUE	reported	textfile	8259	11	65203561	DPF2	2.9752e-35	31015	0.0104480731701604	exposure	TRUE	reported	GZNiJD	textfile	2	1	TRUE	0.00492483474267193	153.489811832443	133.011259152442	NA	NA	0.00492515077654089	31015	0.000875489341089015	8259	TRUE	0.00101532910065773
rs117789850	T	C	T	C	-0.101189	-0.000761175	0.942533303057826	0.05124	FALSE	FALSE	FALSE	L3wNab	0.0345227	0.982409	outcome	TRUE	reported	textfile	8259	11	65215402	DPF2	3.4004e-09	31499	0.017119069260196	exposure	TRUE	reported	GZNiJD	textfile	2	1	TRUE	0.00110797255932383	34.9365204069519	133.011259152442	NA	NA	0.00110804283553289	31499	5.88758531043825e-08	8259	TRUE	0.00750429677089126
rs12417665	T	C	T	C	0.122923688868673	-0.0390707	0.143835353690348	0.150848	FALSE	FALSE	FALSE	L3wNab	0.0213642	0.0674306	outcome	TRUE	reported	textfile	8259	11	65164357	DPF2	5.0035e-27	31143	0.011418086038871	exposure	TRUE	reported	GZNiJD	textfile	2	1	TRUE	0.00370775348430966	115.892853385835	133.011259152442	NA	NA	0.00370799072814696	31143	0.000404884317386351	8259	TRUE	0.00096854897654373
rs186869143	A	G	A	G	-0.401271	0.122885	0.0265486725663717	0.00570665	FALSE	FALSE	FALSE	L3wNab	0.101449	0.225781	outcome	TRUE	reported	textfile	8259	11	65355791	DPF2	1.5603e-08	3842	0.070962318337875	exposure	TRUE	reported	GZNiJD	textfile	2	1	TRUE	0.00825395798185474	31.9589867843832	133.011259152442	NA	NA	0.00825822141673458	3842	0.000177665358326379	8259	TRUE	6.82103109571629e-05
rs2271448	T	C	T	C	0.0606954314070514	0.00727533	0.325246185071037	0.299451	FALSE	FALSE	FALSE	L3wNab	0.0167687	0.664387	outcome	TRUE	reported	textfile	8259	11	64977424	DPF2	8.2342e-13	31681	0.00848021340548131	exposure	TRUE	reported	GZNiJD	textfile	2	1	TRUE	0.00161435071612055	51.2237093678833	133.011259152442	NA	NA	0.0016144524708744	31681	2.27968278128461e-05	8259	TRUE	0.00414364650959778
rs500464	G	A	G	A	-0.121266	0.0253762	0.922394678492239	0.0793863	FALSE	FALSE	FALSE	L3wNab	0.028221	0.368548	outcome	TRUE	reported	textfile	8259	11	64793960	DPF2	3.1511e-16	31684	0.0148477571034593	exposure	TRUE	reported	GZNiJD	textfile	2	1	TRUE	0.00210089160957776	66.7005786607049	133.011259152442	NA	NA	0.0021010239546056	31684	9.79137241868779e-05	8259	TRUE	0.00359977436189298
rs56205242	A	G	A	G	0.172905572353062	-0.0291254	0.10460124029663	0.130239	FALSE	FALSE	FALSE	L3wNab	0.0229475	0.204364	outcome	TRUE	reported	textfile	8259	11	65077651	DPF2	3.8759e-36	28134	0.0137750314571316	exposure	TRUE	reported	GZNiJD	textfile	2	1	TRUE	0.005568983861649	157.544014067752	133.011259152442	NA	NA	0.00556937757472221	28134	0.000195059018290898	8259	TRUE	1.18909721634413e-06
rs566908	T	C	T	C	0.105573316705821	-0.0148849	0.457745149845248	0.474152	FALSE	FALSE	FALSE	L3wNab	0.0155118	0.337264	outcome	TRUE	reported	textfile	8259	11	64837370	DPF2	7.0561e-40	31569	0.00798805398639725	exposure	TRUE	reported	GZNiJD	textfile	2	1	TRUE	0.00550261551963827	174.662162836338	133.011259152442	NA	NA	0.00550296223201729	31569	0.000111505614627219	8259	TRUE	2.49766441918798e-07
rs629710	A	C	A	C	-0.286303	0.0178836	0.740101843445308	0.273212	FALSE	FALSE	FALSE	L3wNab	0.0170691	0.294769	outcome	TRUE	reported	textfile	8259	11	65109233	DPF2	1e-200	30408	0.00924578374710192	exposure	TRUE	reported	GZNiJD	textfile	2	1	TRUE	0.0305698477538163	958.817701975595	133.011259152442	NA	NA	0.0305717970580702	30408	0.00013292560089723	8259	TRUE	2.12921562803301e-40
rs658794	T	G	T	G	0.0874474678796026	-0.00783112	0.0856532493816056	0.0772172	FALSE	FALSE	FALSE	L3wNab	0.0287826	0.785562	outcome	TRUE	reported	textfile	8259	11	65121203	DPF2	1.069e-08	27310	0.0152896226666438	exposure	TRUE	reported	GZNiJD	textfile	2	1	TRUE	0.00119635305066583	32.7091407879488	133.011259152442	NA	NA	0.00119644056507079	27310	8.96523205450814e-06	8259	TRUE	0.0118450548137491
rs675671	G	A	G	A	-0.232143	0.00249698	0.100076103500761	0.0926016	FALSE	FALSE	FALSE	L3wNab	0.0260446	0.923621	outcome	TRUE	reported	textfile	8259	11	65027156	DPF2	2.009e-57	26280	0.0145346385400426	exposure	TRUE	reported	GZNiJD	textfile	2	1	TRUE	0.0096135023808561	255.075787252184	133.011259152442	NA	NA	0.0096142270232175	26280	1.11319686845894e-06	8259	TRUE	1.2283022912987e-14
rs7114754	C	T	C	T	-0.179387	-0.0559485	0.0780375061069563	0.0771796	FALSE	FALSE	FALSE	L3wNab	0.0285318	0.049889	outcome	TRUE	reported	textfile	8259	11	64971396	DPF2	9.0577e-34	31684	0.0148100553593361	exposure	TRUE	reported	GZNiJD	textfile	2	1	TRUE	0.00460915399018544	146.703395256676	133.011259152442	NA	NA	0.00460944361258016	31684	0.000465472543747694	8259	TRUE	0.000172234745946489
rs71541906	A	G	A	G	-0.0699504	0.00884267	0.134372474801174	0.157991	FALSE	FALSE	FALSE	L3wNab	0.0210397	0.674277	outcome	TRUE	reported	textfile	8259	11	64608282	DPF2	1.1662e-08	28588	0.0122623138821015	exposure	TRUE	reported	GZNiJD	textfile	2	1	TRUE	0.0011369917810386	32.5390436779943	133.011259152442	NA	NA	0.00113707123944065	28588	2.13922356724082e-05	8259	TRUE	0.0198215478746226
rs72932814	C	T	C	T	0.152715863002314	-0.00975319	0.0326419265321481	0.0387371	FALSE	FALSE	FALSE	L3wNab	0.0395164	0.805052	outcome	TRUE	reported	textfile	8259	11	64832009	DPF2	4.7243e-10	26336	0.0245204577643766	exposure	TRUE	reported	GZNiJD	textfile	2	1	TRUE	0.0014706934441187	38.786283890862	133.011259152442	NA	NA	0.00147080497524507	26336	7.37756653696092e-06	8259	TRUE	0.00470388362172314
rs78287937	G	T	G	T	0.100493705693143	0.0170654	0.0691757476837406	0.084525	FALSE	FALSE	FALSE	L3wNab	0.0273881	0.533223	outcome	TRUE	reported	textfile	8259	11	64773101	DPF2	6.4597e-09	25906	0.0173130684284854	exposure	TRUE	reported	GZNiJD	textfile	2	1	TRUE	0.00129886738685734	33.6896191367248	133.011259152442	NA	NA	0.00129896753974494	25906	4.70182466501373e-05	8259	TRUE	0.0208663811182634
Arachidonoylcarnitine (C20:4) levels
SNP	effect_allele.exposure	other_allele.exposure	effect_allele.outcome	other_allele.outcome	beta.exposure	beta.outcome	eaf.exposure	eaf.outcome	remove	palindromic	ambiguous	id.outcome	se.outcome	pval.outcome	outcome	mr_keep.outcome	pval_origin.outcome	data_source.outcome	samplesize.outcome	chr.exposure	pos.exposure	gene.exposure	pval.exposure	samplesize.exposure	se.exposure	exposure	mr_keep.exposure	pval_origin.exposure	id.exposure	data_source.exposure	action	SNP_index	mr_keep	R2	f	meanf	units.outcome	units.exposure	rsq.exposure	effective_n.exposure	rsq.outcome	effective_n.outcome	steiger_dir	steiger_pval
rs1078457	T	C	T	C	-0.0653946	-0.00257167	0.199425006576722	0.197865	FALSE	FALSE	FALSE	shJD8A	0.0187678	0.891011	outcome	TRUE	reported	textfile	8202	11	65380124	DPF2	4.781e-11	31684	0.00994200969041249	exposure	TRUE	reported	fKRO7G	textfile	2	1	TRUE	0.00136364801703067	43.2620907398157	133.011259152442	NA	NA	0.00136373398309114	31684	2.28975437219749e-06	8202	TRUE	0.00424199551290272
rs10791813	G	C	G	C	0.0437792166689973	0.018727	0.435416902578039	0.455839	FALSE	TRUE	TRUE	shJD8A	0.0147349	0.203754	outcome	TRUE	reported	textfile	8202	11	64865261	DPF2	4.9249e-08	31568	0.00802684524834478	exposure	TRUE	reported	fKRO7G	textfile	2	1	FALSE	0.000941434419843351	29.7453221668925	133.011259152442	NA	NA	0.000941494012320382	31568	0.000196943949453783	8202	TRUE	0.1789652290002
rs111295021	A	C	A	C	0.0899297425264563	-0.0203204	0.0908027883966719	0.0863106	FALSE	FALSE	FALSE	shJD8A	0.0266522	0.445804	outcome	TRUE	reported	textfile	8202	11	65251405	DPF2	1.5526e-09	27310	0.0148917422918837	exposure	TRUE	reported	fKRO7G	textfile	2	1	TRUE	0.00133356573844614	36.4656425169782	133.011259152442	NA	NA	0.00133366327669213	27310	7.08849014161496e-05	8202	TRUE	0.0255717663148382
rs1144924	T	C	T	C	-0.129446	0.0100436	0.819872783346184	0.200745	FALSE	FALSE	FALSE	shJD8A	0.0183943	0.585054	outcome	TRUE	reported	textfile	8202	11	65203561	DPF2	2.9752e-35	31015	0.0104480731701604	exposure	TRUE	reported	fKRO7G	textfile	2	1	TRUE	0.00492483474267193	153.489811832443	133.011259152442	NA	NA	0.00492515077654089	31015	3.63565482046774e-05	8202	TRUE	2.27804756749708e-07
rs117789850	T	C	T	C	-0.101189	-0.0688954	0.942533303057826	0.0514139	FALSE	FALSE	FALSE	shJD8A	0.0334771	0.0395916	outcome	TRUE	reported	textfile	8202	11	65215402	DPF2	3.4004e-09	31499	0.017119069260196	exposure	TRUE	reported	fKRO7G	textfile	2	1	TRUE	0.00110797255932383	34.9365204069519	133.011259152442	NA	NA	0.00110804283553289	31499	0.000516234095507741	8202	TRUE	0.393695457377779
rs12417665	T	C	T	C	0.122923688868673	0.00229051	0.143835353690348	0.151186	FALSE	FALSE	FALSE	shJD8A	0.0207937	0.912287	outcome	TRUE	reported	textfile	8202	11	65164357	DPF2	5.0035e-27	31143	0.011418086038871	exposure	TRUE	reported	fKRO7G	textfile	2	1	TRUE	0.00370775348430966	115.892853385835	133.011259152442	NA	NA	0.00370799072814696	31143	1.47974316111596e-06	8202	TRUE	1.48133333679246e-06
rs186869143	A	G	A	G	-0.401271	0.159095	0.0265486725663717	0.00574642	FALSE	FALSE	FALSE	shJD8A	0.0983383	0.105698	outcome	TRUE	reported	textfile	8202	11	65355791	DPF2	1.5603e-08	3842	0.070962318337875	exposure	TRUE	reported	fKRO7G	textfile	2	1	TRUE	0.00825395798185474	31.9589867843832	133.011259152442	NA	NA	0.00825822141673458	3842	0.000319091485067062	8202	TRUE	0.00017956458217507
rs2271448	T	C	T	C	0.0606954314070514	-0.0408528	0.325246185071037	0.297815	FALSE	FALSE	FALSE	shJD8A	0.0163546	0.0124919	outcome	TRUE	reported	textfile	8202	11	64977424	DPF2	8.2342e-13	31681	0.00848021340548131	exposure	TRUE	reported	fKRO7G	textfile	2	1	TRUE	0.00161435071612055	51.2237093678833	133.011259152442	NA	NA	0.0016144524708744	31681	0.000760360598931327	8202	TRUE	0.308434256719787
rs500464	G	A	G	A	-0.121266	0.0217902	0.922394678492239	0.0793991	FALSE	FALSE	FALSE	shJD8A	0.0274899	0.427974	outcome	TRUE	reported	textfile	8202	11	64793960	DPF2	3.1511e-16	31684	0.0148477571034593	exposure	TRUE	reported	fKRO7G	textfile	2	1	TRUE	0.00210089160957776	66.7005786607049	133.011259152442	NA	NA	0.0021010239546056	31684	7.66176777390421e-05	8202	TRUE	0.00274053746122712
rs56205242	A	G	A	G	0.172905572353062	0.0132867	0.10460124029663	0.130465	FALSE	FALSE	FALSE	shJD8A	0.0222944	0.551199	outcome	TRUE	reported	textfile	8202	11	65077651	DPF2	3.8759e-36	28134	0.0137750314571316	exposure	TRUE	reported	fKRO7G	textfile	2	1	TRUE	0.005568983861649	157.544014067752	133.011259152442	NA	NA	0.00556937757472221	28134	4.33121774412019e-05	8202	TRUE	5.54311294621873e-08
rs566908	T	C	T	C	0.105573316705821	-0.0111922	0.457745149845248	0.474029	FALSE	FALSE	FALSE	shJD8A	0.0150961	0.458454	outcome	TRUE	reported	textfile	8202	11	64837370	DPF2	7.0561e-40	31569	0.00798805398639725	exposure	TRUE	reported	fKRO7G	textfile	2	1	TRUE	0.00550261551963827	174.662162836338	133.011259152442	NA	NA	0.00550296223201729	31569	6.70283352200411e-05	8202	TRUE	9.54683714315613e-08
rs629710	A	C	A	C	-0.286303	0.0237257	0.740101843445308	0.273526	FALSE	FALSE	FALSE	shJD8A	0.0165975	0.152868	outcome	TRUE	reported	textfile	8202	11	65109233	DPF2	1e-200	30408	0.00924578374710192	exposure	TRUE	reported	fKRO7G	textfile	2	1	TRUE	0.0305698477538163	958.817701975595	133.011259152442	NA	NA	0.0305717970580702	30408	0.000249132652457918	8202	TRUE	3.12629506386451e-38
rs658794	T	G	T	G	0.0874474678796026	0.0228516	0.0856532493816056	0.0772479	FALSE	FALSE	FALSE	shJD8A	0.027983	0.414143	outcome	TRUE	reported	textfile	8202	11	65121203	DPF2	1.069e-08	27310	0.0152896226666438	exposure	TRUE	reported	fKRO7G	textfile	2	1	TRUE	0.00119635305066583	32.7091407879488	133.011259152442	NA	NA	0.00119644056507079	27310	8.13196520056309e-05	8202	TRUE	0.0421842464735711
rs675671	G	A	G	A	-0.232143	0.01591	0.100076103500761	0.0923302	FALSE	FALSE	FALSE	shJD8A	0.0253852	0.530828	outcome	TRUE	reported	textfile	8202	11	65027156	DPF2	2.009e-57	26280	0.0145346385400426	exposure	TRUE	reported	fKRO7G	textfile	2	1	TRUE	0.0096135023808561	255.075787252184	133.011259152442	NA	NA	0.0096142270232175	26280	4.79009938768552e-05	8202	TRUE	4.86479575461432e-13
rs7114754	C	T	C	T	-0.179387	0.0526071	0.0780375061069563	0.0777778	FALSE	FALSE	FALSE	shJD8A	0.0276662	0.0572372	outcome	TRUE	reported	textfile	8202	11	64971396	DPF2	9.0577e-34	31684	0.0148100553593361	exposure	TRUE	reported	fKRO7G	textfile	2	1	TRUE	0.00460915399018544	146.703395256676	133.011259152442	NA	NA	0.00460944361258016	31684	0.000440741953978686	8202	TRUE	0.000148720918670781
rs71541906	A	G	A	G	-0.0699504	0.0160548	0.134372474801174	0.157684	FALSE	FALSE	FALSE	shJD8A	0.0204522	0.432458	outcome	TRUE	reported	textfile	8202	11	64608282	DPF2	1.1662e-08	28588	0.0122623138821015	exposure	TRUE	reported	fKRO7G	textfile	2	1	TRUE	0.0011369917810386	32.5390436779943	133.011259152442	NA	NA	0.00113707123944065	28588	7.51420865088131e-05	8202	TRUE	0.0454252399096777
rs72932814	C	T	C	T	0.152715863002314	-0.0484403	0.0326419265321481	0.0386403	FALSE	FALSE	FALSE	shJD8A	0.0385362	0.208752	outcome	TRUE	reported	textfile	8202	11	64832009	DPF2	4.7243e-10	26336	0.0245204577643766	exposure	TRUE	reported	fKRO7G	textfile	2	1	TRUE	0.0014706934441187	38.786283890862	133.011259152442	NA	NA	0.00147080497524507	26336	0.000192654139360071	8202	TRUE	0.0528209452668071
rs78287937	G	T	G	T	0.100493705693143	-0.00356346	0.0691757476837406	0.0847468	FALSE	FALSE	FALSE	shJD8A	0.0266292	0.893547	outcome	TRUE	reported	textfile	8202	11	64773101	DPF2	6.4597e-09	25906	0.0173130684284854	exposure	TRUE	reported	fKRO7G	textfile	2	1	TRUE	0.00129886738685734	33.6896191367248	133.011259152442	NA	NA	0.00129896753974494	25906	2.18379937135328e-06	8202	TRUE	0.00635570295245571
X-11381 levels
SNP	effect_allele.exposure	other_allele.exposure	effect_allele.outcome	other_allele.outcome	beta.exposure	beta.outcome	eaf.exposure	eaf.outcome	remove	palindromic	ambiguous	id.outcome	se.outcome	pval.outcome	outcome	mr_keep.outcome	pval_origin.outcome	data_source.outcome	samplesize.outcome	chr.exposure	pos.exposure	gene.exposure	pval.exposure	samplesize.exposure	se.exposure	exposure	mr_keep.exposure	pval_origin.exposure	id.exposure	data_source.exposure	action	SNP_index	mr_keep	R2	f	meanf	units.outcome	units.exposure	rsq.exposure	effective_n.exposure	rsq.outcome	effective_n.outcome	steiger_dir	steiger_pval
rs1078457	T	C	T	C	-0.0653946	-0.00184271	0.199425006576722	0.19829	FALSE	FALSE	FALSE	1mX7VI	0.0192393	0.923696	outcome	TRUE	reported	textfile	8225	11	65380124	DPF2	4.781e-11	31684	0.00994200969041249	exposure	TRUE	reported	pV453g	textfile	2	1	TRUE	0.00136364801703067	43.2620907398157	133.011259152442	NA	NA	0.00136373398309114	31684	1.11559016589474e-06	8225	TRUE	0.00373536036552085
rs10791813	G	C	G	C	0.0437792166689973	-0.0176265	0.435416902578039	0.454988	FALSE	TRUE	TRUE	1mX7VI	0.0151301	0.244022	outcome	TRUE	reported	textfile	8225	11	64865261	DPF2	4.9249e-08	31568	0.00802684524834478	exposure	TRUE	reported	pV453g	textfile	2	1	FALSE	0.000941434419843351	29.7453221668925	133.011259152442	NA	NA	0.000941494012320382	31568	0.000165023809610226	8225	TRUE	0.14948049155176
rs111295021	A	C	A	C	0.0899297425264563	-0.00778883	0.0908027883966719	0.0859678	FALSE	FALSE	FALSE	1mX7VI	0.0274556	0.776649	outcome	TRUE	reported	textfile	8225	11	65251405	DPF2	1.5526e-09	27310	0.0148917422918837	exposure	TRUE	reported	pV453g	textfile	2	1	TRUE	0.00133356573844614	36.4656425169782	133.011259152442	NA	NA	0.00133366327669213	27310	9.78696491135146e-06	8225	TRUE	0.0079151101992093
rs1144924	T	C	T	C	-0.129446	0.0200919	0.819872783346184	0.201217	FALSE	FALSE	FALSE	1mX7VI	0.0188497	0.286471	outcome	TRUE	reported	textfile	8225	11	65203561	DPF2	2.9752e-35	31015	0.0104480731701604	exposure	TRUE	reported	pV453g	textfile	2	1	TRUE	0.00492483474267193	153.489811832443	133.011259152442	NA	NA	0.00492515077654089	31015	0.000138147439397662	8225	TRUE	2.36612802602079e-06
rs117789850	T	C	T	C	-0.101189	0.0454167	0.942533303057826	0.0510864	FALSE	FALSE	FALSE	1mX7VI	0.0344562	0.18747	outcome	TRUE	reported	textfile	8225	11	65215402	DPF2	3.4004e-09	31499	0.017119069260196	exposure	TRUE	reported	pV453g	textfile	2	1	TRUE	0.00110797255932383	34.9365204069519	133.011259152442	NA	NA	0.00110804283553289	31499	0.000211239120584631	8225	TRUE	0.129731008733102
rs12417665	T	C	T	C	0.122923688868673	-0.0664048	0.143835353690348	0.150864	FALSE	FALSE	FALSE	1mX7VI	0.0213114	0.00183365	outcome	TRUE	reported	textfile	8225	11	65164357	DPF2	5.0035e-27	31143	0.011418086038871	exposure	TRUE	reported	pV453g	textfile	2	1	TRUE	0.00370775348430966	115.892853385835	133.011259152442	NA	NA	0.00370799072814696	31143	0.00117932150930362	8225	TRUE	0.0318379060856675
rs186869143	A	G	A	G	-0.401271	0.0910849	0.0265486725663717	0.00573031	FALSE	FALSE	FALSE	1mX7VI	0.101073	0.367493	outcome	TRUE	reported	textfile	8225	11	65355791	DPF2	1.5603e-08	3842	0.070962318337875	exposure	TRUE	reported	pV453g	textfile	2	1	TRUE	0.00825395798185474	31.9589867843832	133.011259152442	NA	NA	0.00825822141673458	3842	9.87527682671231e-05	8225	TRUE	3.27622141692347e-05
rs2271448	T	C	T	C	0.0606954314070514	0.0145603	0.325246185071037	0.299069	FALSE	FALSE	FALSE	1mX7VI	0.016746	0.384588	outcome	TRUE	reported	textfile	8225	11	64977424	DPF2	8.2342e-13	31681	0.00848021340548131	exposure	TRUE	reported	pV453g	textfile	2	1	TRUE	0.00161435071612055	51.2237093678833	133.011259152442	NA	NA	0.0016144524708744	31681	9.19280942315288e-05	8225	TRUE	0.0133829065112504
rs500464	G	A	G	A	-0.121266	0.0385442	0.922394678492239	0.0794107	FALSE	FALSE	FALSE	1mX7VI	0.0281629	0.171119	outcome	TRUE	reported	textfile	8225	11	64793960	DPF2	3.1511e-16	31684	0.0148477571034593	exposure	TRUE	reported	pV453g	textfile	2	1	TRUE	0.00210089160957776	66.7005786607049	133.011259152442	NA	NA	0.0021010239546056	31684	0.000227737274875859	8225	TRUE	0.0128959613334844
rs56205242	A	G	A	G	0.172905572353062	-0.00756788	0.10460124029663	0.130216	FALSE	FALSE	FALSE	1mX7VI	0.0229346	0.741418	outcome	TRUE	reported	textfile	8225	11	65077651	DPF2	3.8759e-36	28134	0.0137750314571316	exposure	TRUE	reported	pV453g	textfile	2	1	TRUE	0.005568983861649	157.544014067752	133.011259152442	NA	NA	0.00556937757472221	28134	1.324128377661e-05	8225	TRUE	1.39875346994147e-08
rs566908	T	C	T	C	0.105573316705821	-0.0146142	0.457745149845248	0.474224	FALSE	FALSE	FALSE	1mX7VI	0.0154979	0.345689	outcome	TRUE	reported	textfile	8225	11	64837370	DPF2	7.0561e-40	31569	0.00798805398639725	exposure	TRUE	reported	pV453g	textfile	2	1	TRUE	0.00550261551963827	174.662162836338	133.011259152442	NA	NA	0.00550296223201729	31569	0.000108125252197219	8225	TRUE	2.43710157929903e-07
rs629710	A	C	A	C	-0.286303	0.0281016	0.740101843445308	0.273186	FALSE	FALSE	FALSE	1mX7VI	0.0170301	0.0989192	outcome	TRUE	reported	textfile	8225	11	65109233	DPF2	1e-200	30408	0.00924578374710192	exposure	TRUE	reported	pV453g	textfile	2	1	TRUE	0.0305698477538163	958.817701975595	133.011259152442	NA	NA	0.0305717970580702	30408	0.000331019535675692	8225	TRUE	3.18276295041453e-37
rs658794	T	G	T	G	0.0874474678796026	0.0449107	0.0856532493816056	0.0771613	FALSE	FALSE	FALSE	1mX7VI	0.0287315	0.118025	outcome	TRUE	reported	textfile	8225	11	65121203	DPF2	1.069e-08	27310	0.0152896226666438	exposure	TRUE	reported	pV453g	textfile	2	1	TRUE	0.00119635305066583	32.7091407879488	133.011259152442	NA	NA	0.00119644056507079	27310	0.000297046017102772	8225	TRUE	0.167418517115482
rs675671	G	A	G	A	-0.232143	0.0119992	0.100076103500761	0.0923039	FALSE	FALSE	FALSE	1mX7VI	0.0260206	0.644696	outcome	TRUE	reported	textfile	8225	11	65027156	DPF2	2.009e-57	26280	0.0145346385400426	exposure	TRUE	reported	pV453g	textfile	2	1	TRUE	0.0096135023808561	255.075787252184	133.011259152442	NA	NA	0.0096142270232175	26280	2.58599957876661e-05	8225	TRUE	1.55901358604601e-13
rs7114754	C	T	C	T	-0.179387	-0.0152992	0.0780375061069563	0.0772556	FALSE	FALSE	FALSE	1mX7VI	0.0284738	0.591054	outcome	TRUE	reported	textfile	8225	11	64971396	DPF2	9.0577e-34	31684	0.0148100553593361	exposure	TRUE	reported	pV453g	textfile	2	1	TRUE	0.00460915399018544	146.703395256676	133.011259152442	NA	NA	0.00460944361258016	31684	3.51075922764458e-05	8225	TRUE	5.2995324540287e-07
rs71541906	A	G	A	G	-0.0699504	0.00518387	0.134372474801174	0.157933	FALSE	FALSE	FALSE	1mX7VI	0.0209795	0.804837	outcome	TRUE	reported	textfile	8225	11	64608282	DPF2	1.1662e-08	28588	0.0122623138821015	exposure	TRUE	reported	pV453g	textfile	2	1	TRUE	0.0011369917810386	32.5390436779943	133.011259152442	NA	NA	0.00113707123944065	28588	7.42479422422536e-06	8225	TRUE	0.013218244760966
rs72932814	C	T	C	T	0.152715863002314	-0.0031991	0.0326419265321481	0.0387758	FALSE	FALSE	FALSE	1mX7VI	0.0394286	0.935333	outcome	TRUE	reported	textfile	8225	11	64832009	DPF2	4.7243e-10	26336	0.0245204577643766	exposure	TRUE	reported	pV453g	textfile	2	1	TRUE	0.0014706934441187	38.786283890862	133.011259152442	NA	NA	0.00147080497524507	26336	8.0057547218354e-07	8225	TRUE	0.003013279504599
rs78287937	G	T	G	T	0.100493705693143	0.0010372	0.0691757476837406	0.0845705	FALSE	FALSE	FALSE	1mX7VI	0.027353	0.969752	outcome	TRUE	reported	textfile	8225	11	64773101	DPF2	6.4597e-09	25906	0.0173130684284854	exposure	TRUE	reported	pV453g	textfile	2	1	TRUE	0.00129886738685734	33.6896191367248	133.011259152442	NA	NA	0.00129896753974494	25906	1.74857682875005e-07	8225	TRUE	0.00487081265656916
X-23739 levels
SNP	effect_allele.exposure	other_allele.exposure	effect_allele.outcome	other_allele.outcome	beta.exposure	beta.outcome	eaf.exposure	eaf.outcome	remove	palindromic	ambiguous	id.outcome	se.outcome	pval.outcome	outcome	mr_keep.outcome	pval_origin.outcome	data_source.outcome	samplesize.outcome	chr.exposure	pos.exposure	gene.exposure	pval.exposure	samplesize.exposure	se.exposure	exposure	mr_keep.exposure	pval_origin.exposure	id.exposure	data_source.exposure	action	SNP_index	mr_keep	R2	f	meanf	units.outcome	units.exposure	rsq.exposure	effective_n.exposure	rsq.outcome	effective_n.outcome	steiger_dir	steiger_pval
rs1078457	T	C	T	C	-0.0653946	0.00091318	0.199425006576722	0.198356	FALSE	FALSE	FALSE	oABWzC	0.019308	0.962278	outcome	TRUE	reported	textfile	8249	11	65380124	DPF2	4.781e-11	31684	0.00994200969041249	exposure	TRUE	reported	7CtUIK	textfile	2	1	TRUE	0.00136364801703067	43.2620907398157	133.011259152442	NA	NA	0.00136373398309114	31684	2.71232726612643e-07	8249	TRUE	0.00321546609034838
rs10791813	G	C	G	C	0.0437792166689973	-0.00145168	0.435416902578039	0.454998	FALSE	TRUE	TRUE	oABWzC	0.0151785	0.923806	outcome	TRUE	reported	textfile	8249	11	64865261	DPF2	4.9249e-08	31568	0.00802684524834478	exposure	TRUE	reported	7CtUIK	textfile	2	1	FALSE	0.000941434419843351	29.7453221668925	133.011259152442	NA	NA	0.000941494012320382	31568	1.10914314873932e-06	8249	TRUE	0.0165456522770919
rs111295021	A	C	A	C	0.0899297425264563	-0.0694068	0.0908027883966719	0.0860952	FALSE	FALSE	FALSE	oABWzC	0.0274609	0.0114887	outcome	TRUE	reported	textfile	8249	11	65251405	DPF2	1.5526e-09	27310	0.0148917422918837	exposure	TRUE	reported	7CtUIK	textfile	2	1	TRUE	0.00133356573844614	36.4656425169782	133.011259152442	NA	NA	0.00133366327669213	27310	0.000774002280914049	8249	TRUE	0.488327544929994
rs1144924	T	C	T	C	-0.129446	0.00323055	0.819872783346184	0.20142	FALSE	FALSE	FALSE	oABWzC	0.0189185	0.864411	outcome	TRUE	reported	textfile	8249	11	65203561	DPF2	2.9752e-35	31015	0.0104480731701604	exposure	TRUE	reported	7CtUIK	textfile	2	1	TRUE	0.00492483474267193	153.489811832443	133.011259152442	NA	NA	0.00492515077654089	31015	3.53575370763138e-06	8249	TRUE	3.35771020641278e-08
rs117789850	T	C	T	C	-0.101189	-0.033247	0.942533303057826	0.0512415	FALSE	FALSE	FALSE	oABWzC	0.0345316	0.335648	outcome	TRUE	reported	textfile	8249	11	65215402	DPF2	3.4004e-09	31499	0.017119069260196	exposure	TRUE	reported	7CtUIK	textfile	2	1	TRUE	0.00110797255932383	34.9365204069519	133.011259152442	NA	NA	0.00110804283553289	31499	0.000112389752829008	8249	TRUE	0.0665233373963845
rs12417665	T	C	T	C	0.122923688868673	0.0268685	0.143835353690348	0.150788	FALSE	FALSE	FALSE	oABWzC	0.0214108	0.209515	outcome	TRUE	reported	textfile	8249	11	65164357	DPF2	5.0035e-27	31143	0.011418086038871	exposure	TRUE	reported	7CtUIK	textfile	2	1	TRUE	0.00370775348430966	115.892853385835	133.011259152442	NA	NA	0.00370799072814696	31143	0.00019091591685064	8249	TRUE	0.000140591423288197
rs186869143	A	G	A	G	-0.401271	-0.11855	0.0265486725663717	0.00553124	FALSE	FALSE	FALSE	oABWzC	0.103193	0.250633	outcome	TRUE	reported	textfile	8249	11	65355791	DPF2	1.5603e-08	3842	0.070962318337875	exposure	TRUE	reported	7CtUIK	textfile	2	1	TRUE	0.00825395798185474	31.9589867843832	133.011259152442	NA	NA	0.00825822141673458	3842	0.000160006324799181	8249	TRUE	5.9075441986931e-05
rs2271448	T	C	T	C	0.0606954314070514	-0.0198491	0.325246185071037	0.299023	FALSE	FALSE	FALSE	oABWzC	0.0168015	0.237449	outcome	TRUE	reported	textfile	8249	11	64977424	DPF2	8.2342e-13	31681	0.00848021340548131	exposure	TRUE	reported	7CtUIK	textfile	2	1	TRUE	0.00161435071612055	51.2237093678833	133.011259152442	NA	NA	0.0016144524708744	31681	0.000169206109815095	8249	TRUE	0.0278350404919722
rs500464	G	A	G	A	-0.121266	-0.0245964	0.922394678492239	0.079188	FALSE	FALSE	FALSE	oABWzC	0.0282927	0.384653	outcome	TRUE	reported	textfile	8249	11	64793960	DPF2	3.1511e-16	31684	0.0148477571034593	exposure	TRUE	reported	7CtUIK	textfile	2	1	TRUE	0.00210089160957776	66.7005786607049	133.011259152442	NA	NA	0.0021010239546056	31684	9.16343940758119e-05	8249	TRUE	0.0033252665858555
rs56205242	A	G	A	G	0.172905572353062	0.0265792	0.10460124029663	0.13051	FALSE	FALSE	FALSE	oABWzC	0.0229861	0.247551	outcome	TRUE	reported	textfile	8249	11	65077651	DPF2	3.8759e-36	28134	0.0137750314571316	exposure	TRUE	reported	7CtUIK	textfile	2	1	TRUE	0.005568983861649	157.544014067752	133.011259152442	NA	NA	0.00556937757472221	28134	0.000162101422763219	8249	TRUE	7.27913557425231e-07
rs566908	T	C	T	C	0.105573316705821	0.0197769	0.457745149845248	0.474242	FALSE	FALSE	FALSE	oABWzC	0.0155459	0.203314	outcome	TRUE	reported	textfile	8249	11	64837370	DPF2	7.0561e-40	31569	0.00798805398639725	exposure	TRUE	reported	7CtUIK	textfile	2	1	TRUE	0.00550261551963827	174.662162836338	133.011259152442	NA	NA	0.00550296223201729	31569	0.000196202024027975	8249	TRUE	1.0793521523189e-06
rs629710	A	C	A	C	-0.286303	-0.0170026	0.740101843445308	0.272937	FALSE	FALSE	FALSE	oABWzC	0.0170969	0.319987	outcome	TRUE	reported	textfile	8249	11	65109233	DPF2	1e-200	30408	0.00924578374710192	exposure	TRUE	reported	7CtUIK	textfile	2	1	TRUE	0.0305698477538163	958.817701975595	133.011259152442	NA	NA	0.0305717970580702	30408	0.00011990791726059	8249	TRUE	1.24065515139216e-40
rs658794	T	G	T	G	0.0874474678796026	0.0385123	0.0856532493816056	0.0772413	FALSE	FALSE	FALSE	oABWzC	0.0288197	0.181445	outcome	TRUE	reported	textfile	8249	11	65121203	DPF2	1.069e-08	27310	0.0152896226666438	exposure	TRUE	reported	7CtUIK	textfile	2	1	TRUE	0.00119635305066583	32.7091407879488	133.011259152442	NA	NA	0.00119644056507079	27310	0.000216486080275461	8249	TRUE	0.11346307263525
rs675671	G	A	G	A	-0.232143	-0.0133824	0.100076103500761	0.0924712	FALSE	FALSE	FALSE	oABWzC	0.0260967	0.608091	outcome	TRUE	reported	textfile	8249	11	65027156	DPF2	2.009e-57	26280	0.0145346385400426	exposure	TRUE	reported	7CtUIK	textfile	2	1	TRUE	0.0096135023808561	255.075787252184	133.011259152442	NA	NA	0.0096142270232175	26280	3.18850413973339e-05	8249	TRUE	2.04621628773573e-13
rs7114754	C	T	C	T	-0.179387	-0.0108988	0.0780375061069563	0.0772733	FALSE	FALSE	FALSE	oABWzC	0.0285696	0.702846	outcome	TRUE	reported	textfile	8249	11	64971396	DPF2	9.0577e-34	31684	0.0148100553593361	exposure	TRUE	reported	7CtUIK	textfile	2	1	TRUE	0.00460915399018544	146.703395256676	133.011259152442	NA	NA	0.00460944361258016	31684	1.76459639701684e-05	8249	TRUE	2.46376094392407e-07
rs71541906	A	G	A	G	-0.0699504	-0.0168791	0.134372474801174	0.15802	FALSE	FALSE	FALSE	oABWzC	0.0210611	0.422879	outcome	TRUE	reported	textfile	8249	11	64608282	DPF2	1.1662e-08	28588	0.0122623138821015	exposure	TRUE	reported	7CtUIK	textfile	2	1	TRUE	0.0011369917810386	32.5390436779943	133.011259152442	NA	NA	0.00113707123944065	28588	7.78765412198931e-05	8249	TRUE	0.046301443582386
rs72932814	C	T	C	T	0.152715863002314	0.0290328	0.0326419265321481	0.0386626	FALSE	FALSE	FALSE	oABWzC	0.0396114	0.463594	outcome	TRUE	reported	textfile	8249	11	64832009	DPF2	4.7243e-10	26336	0.0245204577643766	exposure	TRUE	reported	7CtUIK	textfile	2	1	TRUE	0.0014706934441187	38.786283890862	133.011259152442	NA	NA	0.00147080497524507	26336	6.51348140053784e-05	8249	TRUE	0.0163495320909324
rs78287937	G	T	G	T	0.100493705693143	-0.00960842	0.0691757476837406	0.0846882	FALSE	FALSE	FALSE	oABWzC	0.0274334	0.726155	outcome	TRUE	reported	textfile	8249	11	64773101	DPF2	6.4597e-09	25906	0.0173130684284854	exposure	TRUE	reported	7CtUIK	textfile	2	1	TRUE	0.00129886738685734	33.6896191367248	133.011259152442	NA	NA	0.00129896753974494	25906	1.48744950259866e-05	8249	TRUE	0.010877176402887
Glycine to phosphate ratio
SNP	effect_allele.exposure	other_allele.exposure	effect_allele.outcome	other_allele.outcome	beta.exposure	beta.outcome	eaf.exposure	eaf.outcome	remove	palindromic	ambiguous	id.outcome	se.outcome	pval.outcome	outcome	mr_keep.outcome	pval_origin.outcome	data_source.outcome	samplesize.outcome	chr.exposure	pos.exposure	gene.exposure	pval.exposure	samplesize.exposure	se.exposure	exposure	mr_keep.exposure	pval_origin.exposure	id.exposure	data_source.exposure	action	SNP_index	mr_keep	R2	f	meanf	units.outcome	units.exposure	rsq.exposure	effective_n.exposure	rsq.outcome	effective_n.outcome	steiger_dir	steiger_pval
rs1078457	T	C	T	C	-0.0653946	-0.011446	0.199425006576722	0.197993	FALSE	FALSE	FALSE	Y7fF8m	0.0195002	0.557225	outcome	TRUE	reported	textfile	8271	11	65380124	DPF2	4.781e-11	31684	0.00994200969041249	exposure	TRUE	reported	heGfvI	textfile	2	1	TRUE	0.00136364801703067	43.2620907398157	133.011259152442	NA	NA	0.00136373398309114	31684	4.16637412326122e-05	8271	TRUE	0.0135505178175024
rs10791813	G	C	G	C	0.0437792166689973	0.0305892	0.435416902578039	0.455058	FALSE	TRUE	TRUE	Y7fF8m	0.0153203	0.0458634	outcome	TRUE	reported	textfile	8271	11	64865261	DPF2	4.9249e-08	31568	0.00802684524834478	exposure	TRUE	reported	heGfvI	textfile	2	1	FALSE	0.000941434419843351	29.7453221668925	133.011259152442	NA	NA	0.000941494012320382	31568	0.000481880528819039	8271	TRUE	0.479384899969844
rs111295021	A	C	A	C	0.0899297425264563	0.00690622	0.0908027883966719	0.0859433	FALSE	FALSE	FALSE	Y7fF8m	0.0277511	0.803467	outcome	TRUE	reported	textfile	8271	11	65251405	DPF2	1.5526e-09	27310	0.0148917422918837	exposure	TRUE	reported	heGfvI	textfile	2	1	TRUE	0.00133356573844614	36.4656425169782	133.011259152442	NA	NA	0.00133366327669213	27310	7.48969561656062e-06	8271	TRUE	0.00709037964054901
rs1144924	T	C	T	C	-0.129446	-3.59799e-05	0.819872783346184	0.201731	FALSE	FALSE	FALSE	Y7fF8m	0.019091	0.998496	outcome	TRUE	reported	textfile	8271	11	65203561	DPF2	2.9752e-35	31015	0.0104480731701604	exposure	TRUE	reported	heGfvI	textfile	2	1	TRUE	0.00492483474267193	153.489811832443	133.011259152442	NA	NA	0.00492515077654089	31015	4.29545878700926e-10	8271	TRUE	1.36484948947125e-08
rs117789850	T	C	T	C	-0.101189	-0.0387343	0.942533303057826	0.0514081	FALSE	FALSE	FALSE	Y7fF8m	0.0348087	0.265804	outcome	TRUE	reported	textfile	8271	11	65215402	DPF2	3.4004e-09	31499	0.017119069260196	exposure	TRUE	reported	heGfvI	textfile	2	1	TRUE	0.00110797255932383	34.9365204069519	133.011259152442	NA	NA	0.00110804283553289	31499	0.00014972619697101	8271	TRUE	0.0882877043815879
rs12417665	T	C	T	C	0.122923688868673	0.0389745	0.143835353690348	0.150749	FALSE	FALSE	FALSE	Y7fF8m	0.0216249	0.0714988	outcome	TRUE	reported	textfile	8271	11	65164357	DPF2	5.0035e-27	31143	0.011418086038871	exposure	TRUE	reported	heGfvI	textfile	2	1	TRUE	0.00370775348430966	115.892853385835	133.011259152442	NA	NA	0.00370799072814696	31143	0.000392671452250771	8271	TRUE	0.000880614044732839
rs186869143	A	G	A	G	-0.401271	0.0277328	0.0265486725663717	0.00569835	FALSE	FALSE	FALSE	Y7fF8m	0.102642	0.787015	outcome	TRUE	reported	textfile	8271	11	65355791	DPF2	1.5603e-08	3842	0.070962318337875	exposure	TRUE	reported	heGfvI	textfile	2	1	TRUE	0.00825395798185474	31.9589867843832	133.011259152442	NA	NA	0.00825822141673458	3842	8.82836746833279e-06	8271	TRUE	6.36914839252778e-06
rs2271448	T	C	T	C	0.0606954314070514	-0.0241081	0.325246185071037	0.298953	FALSE	FALSE	FALSE	Y7fF8m	0.0169715	0.15546	outcome	TRUE	reported	textfile	8271	11	64977424	DPF2	8.2342e-13	31681	0.00848021340548131	exposure	TRUE	reported	heGfvI	textfile	2	1	TRUE	0.00161435071612055	51.2237093678833	133.011259152442	NA	NA	0.0016144524708744	31681	0.000243964454404776	8271	TRUE	0.0465437256258323
rs500464	G	A	G	A	-0.121266	0.0253053	0.922394678492239	0.0794529	FALSE	FALSE	FALSE	Y7fF8m	0.0285229	0.374975	outcome	TRUE	reported	textfile	8271	11	64793960	DPF2	3.1511e-16	31684	0.0148477571034593	exposure	TRUE	reported	heGfvI	textfile	2	1	TRUE	0.00210089160957776	66.7005786607049	133.011259152442	NA	NA	0.0021010239546056	31684	9.51790339368187e-05	8271	TRUE	0.00345337995939274
rs56205242	A	G	A	G	0.172905572353062	0.0144919	0.10460124029663	0.130526	FALSE	FALSE	FALSE	Y7fF8m	0.0231794	0.531834	outcome	TRUE	reported	textfile	8271	11	65077651	DPF2	3.8759e-36	28134	0.0137750314571316	exposure	TRUE	reported	heGfvI	textfile	2	1	TRUE	0.005568983861649	157.544014067752	133.011259152442	NA	NA	0.00556937757472221	28134	4.7268601803923e-05	8271	TRUE	5.72829261930165e-08
rs566908	T	C	T	C	0.105573316705821	0.0365541	0.457745149845248	0.473949	FALSE	FALSE	FALSE	Y7fF8m	0.0156817	0.0197529	outcome	TRUE	reported	textfile	8271	11	64837370	DPF2	7.0561e-40	31569	0.00798805398639725	exposure	TRUE	reported	heGfvI	textfile	2	1	TRUE	0.00550261551963827	174.662162836338	133.011259152442	NA	NA	0.00550296223201729	31569	0.000656670693340063	8271	TRUE	8.1166795666551e-05
rs629710	A	C	A	C	-0.286303	-0.0201032	0.740101843445308	0.273239	FALSE	FALSE	FALSE	Y7fF8m	0.0172501	0.24386	outcome	TRUE	reported	textfile	8271	11	65109233	DPF2	1e-200	30408	0.00924578374710192	exposure	TRUE	reported	heGfvI	textfile	2	1	TRUE	0.0305698477538163	958.817701975595	133.011259152442	NA	NA	0.0305717970580702	30408	0.00016421878532068	8271	TRUE	7.66315141676458e-40
rs658794	T	G	T	G	0.0874474678796026	0.0068603	0.0856532493816056	0.0771031	FALSE	FALSE	FALSE	Y7fF8m	0.0291154	0.813724	outcome	TRUE	reported	textfile	8271	11	65121203	DPF2	1.069e-08	27310	0.0152896226666438	exposure	TRUE	reported	heGfvI	textfile	2	1	TRUE	0.00119635305066583	32.7091407879488	133.011259152442	NA	NA	0.00119644056507079	27310	6.71405331671419e-06	8271	TRUE	0.0107648881826446
rs675671	G	A	G	A	-0.232143	-0.00343381	0.100076103500761	0.0925276	FALSE	FALSE	FALSE	Y7fF8m	0.0263392	0.896275	outcome	TRUE	reported	textfile	8271	11	65027156	DPF2	2.009e-57	26280	0.0145346385400426	exposure	TRUE	reported	heGfvI	textfile	2	1	TRUE	0.0096135023808561	255.075787252184	133.011259152442	NA	NA	0.0096142270232175	26280	2.05538639497609e-06	8271	TRUE	1.50265524587985e-14
rs7114754	C	T	C	T	-0.179387	-0.0072388	0.0780375061069563	0.0774307	FALSE	FALSE	FALSE	Y7fF8m	0.0288175	0.801664	outcome	TRUE	reported	textfile	8271	11	64971396	DPF2	9.0577e-34	31684	0.0148100553593361	exposure	TRUE	reported	heGfvI	textfile	2	1	TRUE	0.00460915399018544	146.703395256676	133.011259152442	NA	NA	0.00460944361258016	31684	7.63069764920765e-06	8271	TRUE	1.27529241398398e-07
rs71541906	A	G	A	G	-0.0699504	-0.00484909	0.134372474801174	0.15784	FALSE	FALSE	FALSE	Y7fF8m	0.0212588	0.81957	outcome	TRUE	reported	textfile	8271	11	64608282	DPF2	1.1662e-08	28588	0.0122623138821015	exposure	TRUE	reported	heGfvI	textfile	2	1	TRUE	0.0011369917810386	32.5390436779943	133.011259152442	NA	NA	0.00113707123944065	28588	6.29197911950485e-06	8271	TRUE	0.0124004103127957
rs72932814	C	T	C	T	0.152715863002314	0.0337248	0.0326419265321481	0.0384942	FALSE	FALSE	FALSE	Y7fF8m	0.0400571	0.399833	outcome	TRUE	reported	textfile	8271	11	64832009	DPF2	4.7243e-10	26336	0.0245204577643766	exposure	TRUE	reported	heGfvI	textfile	2	1	TRUE	0.0014706934441187	38.786283890862	133.011259152442	NA	NA	0.00147080497524507	26336	8.57135609133123e-05	8271	TRUE	0.020929939673356
rs78287937	G	T	G	T	0.100493705693143	0.0147359	0.0691757476837406	0.0845232	FALSE	FALSE	FALSE	Y7fF8m	0.0276902	0.594608	outcome	TRUE	reported	textfile	8271	11	64773101	DPF2	6.4597e-09	25906	0.0173130684284854	exposure	TRUE	reported	heGfvI	textfile	2	1	TRUE	0.00129886738685734	33.6896191367248	133.011259152442	NA	NA	0.00129896753974494	25906	3.42478474521941e-05	8271	TRUE	0.0167925762178559
Paraxanthine to 5-acetylamino-6-formylamino-3-methyluracil ratio
SNP	effect_allele.exposure	other_allele.exposure	effect_allele.outcome	other_allele.outcome	beta.exposure	beta.outcome	eaf.exposure	eaf.outcome	remove	palindromic	ambiguous	id.outcome	se.outcome	pval.outcome	outcome	mr_keep.outcome	pval_origin.outcome	data_source.outcome	samplesize.outcome	chr.exposure	pos.exposure	gene.exposure	pval.exposure	samplesize.exposure	se.exposure	exposure	mr_keep.exposure	pval_origin.exposure	id.exposure	data_source.exposure	action	SNP_index	mr_keep	R2	f	meanf	units.outcome	units.exposure	rsq.exposure	effective_n.exposure	rsq.outcome	effective_n.outcome	steiger_dir	steiger_pval
rs1078457	T	C	T	C	-0.0653946	-0.0110664	0.199425006576722	0.19911	FALSE	FALSE	FALSE	qenH5A	0.0206231	0.591541	outcome	TRUE	reported	textfile	7388	11	65380124	DPF2	4.781e-11	31684	0.00994200969041249	exposure	TRUE	reported	7Pegax	textfile	2	1	TRUE	0.00136364801703067	43.2620907398157	133.011259152442	NA	NA	0.00136373398309114	31684	3.89832998761541e-05	7388	TRUE	0.017503275653073
rs10791813	G	C	G	C	0.0437792166689973	0.0150942	0.435416902578039	0.456876	FALSE	TRUE	TRUE	qenH5A	0.0162272	0.352279	outcome	TRUE	reported	textfile	7388	11	64865261	DPF2	4.9249e-08	31568	0.00802684524834478	exposure	TRUE	reported	7Pegax	textfile	2	1	FALSE	0.000941434419843351	29.7453221668925	133.011259152442	NA	NA	0.000941494012320382	31568	0.000117131268554046	7388	TRUE	0.124246300454721
rs111295021	A	C	A	C	0.0899297425264563	0.0234475	0.0908027883966719	0.0855593	FALSE	FALSE	FALSE	qenH5A	0.0293724	0.424707	outcome	TRUE	reported	textfile	7388	11	65251405	DPF2	1.5526e-09	27310	0.0148917422918837	exposure	TRUE	reported	7Pegax	textfile	2	1	TRUE	0.00133356573844614	36.4656425169782	133.011259152442	NA	NA	0.00133366327669213	27310	8.62715198497739e-05	7388	TRUE	0.0377657313546088
rs1144924	T	C	T	C	-0.129446	0.0359763	0.819872783346184	0.200989	FALSE	FALSE	FALSE	qenH5A	0.0202308	0.0753562	outcome	TRUE	reported	textfile	7388	11	65203561	DPF2	2.9752e-35	31015	0.0104480731701604	exposure	TRUE	reported	7Pegax	textfile	2	1	TRUE	0.00492483474267193	153.489811832443	133.011259152442	NA	NA	0.00492515077654089	31015	0.000427968368713493	7388	TRUE	0.000127616535806703
rs117789850	T	C	T	C	-0.101189	0.0324932	0.942533303057826	0.0515555	FALSE	FALSE	FALSE	qenH5A	0.0367516	0.376626	outcome	TRUE	reported	textfile	7388	11	65215402	DPF2	3.4004e-09	31499	0.017119069260196	exposure	TRUE	reported	7Pegax	textfile	2	1	TRUE	0.00110797255932383	34.9365204069519	133.011259152442	NA	NA	0.00110804283553289	31499	0.000105822301215537	7388	TRUE	0.0750942314776173
rs12417665	T	C	T	C	0.122923688868673	-0.000146809	0.143835353690348	0.150593	FALSE	FALSE	FALSE	qenH5A	0.0228187	0.994867	outcome	TRUE	reported	textfile	7388	11	65164357	DPF2	5.0035e-27	31143	0.011418086038871	exposure	TRUE	reported	7Pegax	textfile	2	1	TRUE	0.00370775348430966	115.892853385835	133.011259152442	NA	NA	0.00370799072814696	31143	5.60420815558573e-09	7388	TRUE	2.54176308208693e-06
rs186869143	A	G	A	G	-0.401271	-0.0766105	0.0265486725663717	0.00529101	FALSE	FALSE	FALSE	qenH5A	0.112471	0.49577	outcome	TRUE	reported	textfile	7388	11	65355791	DPF2	1.5603e-08	3842	0.070962318337875	exposure	TRUE	reported	7Pegax	textfile	2	1	TRUE	0.00825395798185474	31.9589867843832	133.011259152442	NA	NA	0.00825822141673458	3842	6.2814353802628e-05	7388	TRUE	2.89543106192545e-05
rs2271448	T	C	T	C	0.0606954314070514	-0.00908687	0.325246185071037	0.301009	FALSE	FALSE	FALSE	qenH5A	0.0178445	0.610594	outcome	TRUE	reported	textfile	7388	11	64977424	DPF2	8.2342e-13	31681	0.00848021340548131	exposure	TRUE	reported	7Pegax	textfile	2	1	TRUE	0.00161435071612055	51.2237093678833	133.011259152442	NA	NA	0.0016144524708744	31681	3.51071287707547e-05	7388	TRUE	0.00798765781723092
rs500464	G	A	G	A	-0.121266	-0.0148207	0.922394678492239	0.0787396	FALSE	FALSE	FALSE	qenH5A	0.030308	0.624841	outcome	TRUE	reported	textfile	7388	11	64793960	DPF2	3.1511e-16	31684	0.0148477571034593	exposure	TRUE	reported	7Pegax	textfile	2	1	TRUE	0.00210089160957776	66.7005786607049	133.011259152442	NA	NA	0.0021010239546056	31684	3.23742347960192e-05	7388	TRUE	0.00187469502765382
rs56205242	A	G	A	G	0.172905572353062	-0.0538852	0.10460124029663	0.131808	FALSE	FALSE	FALSE	qenH5A	0.0244035	0.0272376	outcome	TRUE	reported	textfile	7388	11	65077651	DPF2	3.8759e-36	28134	0.0137750314571316	exposure	TRUE	reported	7Pegax	textfile	2	1	TRUE	0.005568983861649	157.544014067752	133.011259152442	NA	NA	0.00556937757472221	28134	0.000659688426480301	7388	TRUE	0.000174386410899754
rs566908	T	C	T	C	0.105573316705821	-0.0374639	0.457745149845248	0.474782	FALSE	FALSE	FALSE	qenH5A	0.0166571	0.0245045	outcome	TRUE	reported	textfile	7388	11	64837370	DPF2	7.0561e-40	31569	0.00798805398639725	exposure	TRUE	reported	7Pegax	textfile	2	1	TRUE	0.00550261551963827	174.662162836338	133.011259152442	NA	NA	0.00550296223201729	31569	0.000684416611261433	7388	TRUE	0.000195274670339398
rs629710	A	C	A	C	-0.286303	0.0156604	0.740101843445308	0.271883	FALSE	FALSE	FALSE	qenH5A	0.0183255	0.392791	outcome	TRUE	reported	textfile	7388	11	65109233	DPF2	1e-200	30408	0.00924578374710192	exposure	TRUE	reported	7Pegax	textfile	2	1	TRUE	0.0305698477538163	958.817701975595	133.011259152442	NA	NA	0.0305717970580702	30408	9.88648230960183e-05	7388	TRUE	8.46005779034663e-38
rs658794	T	G	T	G	0.0874474678796026	0.0208563	0.0856532493816056	0.0765412	FALSE	FALSE	FALSE	qenH5A	0.0308451	0.498937	outcome	TRUE	reported	textfile	7388	11	65121203	DPF2	1.069e-08	27310	0.0152896226666438	exposure	TRUE	reported	7Pegax	textfile	2	1	TRUE	0.00119635305066583	32.7091407879488	133.011259152442	NA	NA	0.00119644056507079	27310	6.1896483986173e-05	7388	TRUE	0.041509218199475
rs675671	G	A	G	A	-0.232143	0.00427865	0.100076103500761	0.0915006	FALSE	FALSE	FALSE	qenH5A	0.0280036	0.878564	outcome	TRUE	reported	textfile	7388	11	65027156	DPF2	2.009e-57	26280	0.0145346385400426	exposure	TRUE	reported	7Pegax	textfile	2	1	TRUE	0.0096135023808561	255.075787252184	133.011259152442	NA	NA	0.0096142270232175	26280	3.16064061646719e-06	7388	TRUE	2.23770773803284e-13
rs7114754	C	T	C	T	-0.179387	0.0548022	0.0780375061069563	0.0773818	FALSE	FALSE	FALSE	qenH5A	0.0304677	0.0720663	outcome	TRUE	reported	textfile	7388	11	64971396	DPF2	9.0577e-34	31684	0.0148100553593361	exposure	TRUE	reported	7Pegax	textfile	2	1	TRUE	0.00460915399018544	146.703395256676	133.011259152442	NA	NA	0.00460944361258016	31684	0.000437841726951141	7388	TRUE	0.000269847255978137
rs71541906	A	G	A	G	-0.0699504	0.0033869	0.134372474801174	0.1587	FALSE	FALSE	FALSE	qenH5A	0.0224541	0.880105	outcome	TRUE	reported	textfile	7388	11	64608282	DPF2	1.1662e-08	28588	0.0122623138821015	exposure	TRUE	reported	7Pegax	textfile	2	1	TRUE	0.0011369917810386	32.5390436779943	133.011259152442	NA	NA	0.00113707123944065	28588	3.08036941127386e-06	7388	TRUE	0.0142941863000513
rs72932814	C	T	C	T	0.152715863002314	-0.00217403	0.0326419265321481	0.0385608	FALSE	FALSE	FALSE	qenH5A	0.0422781	0.958989	outcome	TRUE	reported	textfile	7388	11	64832009	DPF2	4.7243e-10	26336	0.0245204577643766	exposure	TRUE	reported	7Pegax	textfile	2	1	TRUE	0.0014706934441187	38.786283890862	133.011259152442	NA	NA	0.00147080497524507	26336	3.5800631168741e-07	7388	TRUE	0.00412383939666834
rs78287937	G	T	G	T	0.100493705693143	0.0531015	0.0691757476837406	0.0859523	FALSE	FALSE	FALSE	qenH5A	0.0290437	0.0675002	outcome	TRUE	reported	textfile	7388	11	64773101	DPF2	6.4597e-09	25906	0.0173130684284854	exposure	TRUE	reported	7Pegax	textfile	2	1	TRUE	0.00129886738685734	33.6896191367248	133.011259152442	NA	NA	0.00129896753974494	25906	0.000452380503656885	7388	TRUE	0.262393951864617

## Sheet: Supplementary Table S2
Supplementary Table S2: Heterogeneity and pleiotropy in MR analyses.
EXPOSURE	OUTCOME	METHOD	NO. OF SNPs	HETEROGENEITY			HORIZONTAL PLEIOTROPY
				Q	Q DEGREES OF FREEDOM	Q P-VALUE	MR-EGGER REGRESSION
							EGGER INTERCEPT	SE	P-VALUE
DPF2	Hepatocellular carcinoma	MR Egger	18	15.7925	16	0.467536	-0.0213507	0.041386	0.612986
DPF2	Hepatocellular carcinoma	Inverse variance weighted	18	16.0586	17	0.519683
DPF2	Glycosyl-N-behenoyl-sphingadienine (d18:2/22:0)	MR Egger	17	20.0765	15	0.169018	-0.00900044	0.0135483	0.516567
DPF2	Glycosyl-N-behenoyl-sphingadienine (d18:2/22:0)	Inverse variance weighted	17	20.6672	16	0.191661
Glycosyl-N-behenoyl-sphingadienine (d18:2/22:0)	Hepatocellular carcinoma	MR Egger	9	7.17552	7	0.410837	0.0266123	0.0577916	0.65913
Glycosyl-N-behenoyl-sphingadienine (d18:2/22:0)	Hepatocellular carcinoma	Inverse variance weighted	9	7.39289	8	0.494896

## Sheet: Supplementary Table S3
The odds ratio (OR), confidence interval (CI), and p-value for Plasma metabolites in Hepatocellular carcinoma
Kynurenine levels
method	nsnp	pval	or	or_lci95	or_uci95
MR Egger	6	0.103425	4.61869	1.10886	19.238
Weighted median	6	0.004551	1.99861	1.23874	3.22462
Inverse variance weighted	6	0.010267	1.66	1.12727	2.44449
4-guanidinobutanoate levels
method	nsnp	pval	or	or_lci95	or_uci95
MR Egger	22	0.051134	1.66517	1.02859	2.6957
Weighted median	22	0.059473	1.2549	0.990967	1.58913
Inverse variance weighted	22	0.000733	1.45738	1.1712	1.8135
Butyrylglycine levels
method	nsnp	pval	or	or_lci95	or_uci95
MR Egger	22	0.271604	0.824968	0.590979	1.1516
Weighted median	22	0.066723	0.835627	0.689676	1.01246
Inverse variance weighted	22	0.007317	0.840211	0.739832	0.954209
Indolebutyrate levels
method	nsnp	pval	or	or_lci95	or_uci95
MR Egger	3	0.369149	1.94485	0.828008	4.56812
Weighted median	3	0.149565	1.39737	0.886488	2.20268
Inverse variance weighted	3	0.037781	1.50393	1.0233	2.21032
5-acetylamino-6-amino-3-methyluracil levels
method	nsnp	pval	or	or_lci95	or_uci95
MR Egger	8	0.511127	0.837587	0.509322	1.37742
Weighted median	8	0.140808	1.25421	0.927809	1.69543
Inverse variance weighted	8	0.029661	1.34488	1.02967	1.75659
Beta-hydroxyisovaleroylcarnitine levels
method	nsnp	pval	or	or_lci95	or_uci95
MR Egger	9	0.775739	1.12666	0.511632	2.48103
Weighted median	9	0.096802	1.37263	0.944486	1.99485
Inverse variance weighted	9	0.007333	1.49537	1.11432	2.00671
Dimethylarginine (sdma + adma) levels
method	nsnp	pval	or	or_lci95	or_uci95
MR Egger	4	0.125693	5.44639	1.47825	20.0665
Weighted median	4	0.065141	1.77039	0.964797	3.24864
Inverse variance weighted	4	0.002724	2.08691	1.28995	3.37625
Mannonate levels
method	nsnp	pval	or	or_lci95	or_uci95
MR Egger	3	0.661624	0.545133	0.072131	4.11989
Weighted median	3	0.019897	0.558382	0.341895	0.911948
Inverse variance weighted	3	0.011927	0.552377	0.347775	0.87735
Etiocholanolone glucuronide levels
method	nsnp	pval	or	or_lci95	or_uci95
MR Egger	10	0.645162	0.911795	0.624594	1.33106
Weighted median	10	0.279122	0.847644	0.628363	1.14345
Inverse variance weighted	10	0.047337	0.786519	0.620358	0.997186
Octadecanedioylcarnitine (C18-DC) levels
method	nsnp	pval	or	or_lci95	or_uci95
MR Egger	27	0.331962	0.874854	0.671285	1.14016
Weighted median	27	0.232584	0.879877	0.713129	1.08562
Inverse variance weighted	27	0.041966	0.857641	0.739661	0.994439
Adipoylcarnitine (C6-DC) levels
method	nsnp	pval	or	or_lci95	or_uci95
MR Egger	9	0.355675	0.609771	0.228744	1.62549
Weighted median	9	0.064611	0.670518	0.438827	1.02453
Inverse variance weighted	9	0.023932	0.67824	0.484211	0.95002
Taurodeoxycholic acid 3-sulfate levels
method	nsnp	pval	or	or_lci95	or_uci95
MR Egger	18	0.760186	0.947616	0.67473	1.33087
Weighted median	18	0.164424	0.843556	0.663675	1.07219
Inverse variance weighted	18	0.021212	0.813621	0.682693	0.96966
1-palmitoyl-2-dihomo-linolenoyl-GPC (16:0/20:3n3 or 6) levels
method	nsnp	pval	or	or_lci95	or_uci95
MR Egger	8	0.77003	0.893825	0.435403	1.8349
Weighted median	8	0.268327	0.835337	0.607442	1.14873
Inverse variance weighted	8	0.035143	0.756137	0.582982	0.980722
1-(1-enyl-palmitoyl)-2-palmitoleoyl-GPC (P-16:0/16:1) levels
method	nsnp	pval	or	or_lci95	or_uci95
MR Egger	16	0.505342	0.813433	0.450012	1.47034
Weighted median	16	0.100344	0.77302	0.568623	1.05089
Inverse variance weighted	16	0.04259	0.764906	0.590341	0.991091
1-(1-enyl-palmitoyl)-2-linoleoyl-GPE (p-16:0/18:2) levels
method	nsnp	pval	or	or_lci95	or_uci95
MR Egger	3	0.9888	0.979199	0.094174	10.1815
Weighted median	3	0.0195311	0.535001	0.316489	0.90438
Inverse variance weighted	3	0.0116156	0.541245	0.335993	0.871882
Glycosyl-N-palmitoyl-sphingosine (d18:1/16:0) levels
method	nsnp	pval	or	or_lci95	or_uci95
MR Egger	11	0.064411	0.506429	0.268916	0.95372
Weighted median	11	0.037121	0.689456	0.486019	0.978047
Inverse variance weighted	11	0.022171	0.716391	0.538312	0.95338
Methylsuccinoylcarnitine levels
method	nsnp	pval	or	or_lci95	or_uci95
MR Egger	23	0.759434	1.08342	0.65307	1.79736
Weighted median	23	0.078965	0.785251	0.599609	1.02837
Inverse variance weighted	23	0.036529	0.822399	0.684676	0.987826
Ascorbic acid 2-sulfate levels
method	nsnp	pval	or	or_lci95	or_uci95
MR Egger	6	0.671049	1.23975	0.493728	3.11302
Weighted median	6	0.028215	1.83969	1.06725	3.17121
Inverse variance weighted	6	0.046642	1.57284	1.00675	2.45725
Glycosyl ceramide (d18:1/20:0, d16:1/22:0) levels
method	nsnp	pval	or	or_lci95	or_uci95
MR Egger	15	0.241903	0.69326	0.385977	1.24518
Weighted median	15	0.059309	0.742618	0.545071	1.01176
Inverse variance weighted	15	0.014692	0.76152	0.611834	0.947827
Arachidonoylcarnitine (C20:4) levels
method	nsnp	pval	or	or_lci95	or_uci95
MR Egger	35	0.870398	0.972396	0.696515	1.35755
Weighted median	35	0.528071	1.07209	0.863614	1.3309
Inverse variance weighted	35	0.036956	1.18297	1.01022	1.38526
3-bromo-5-chloro-2,6-dihydroxybenzoic acid levels
method	nsnp	pval	or	or_lci95	or_uci95
MR Egger	4	0.812574	1.13302	0.457397	2.80658
Weighted median	4	0.016879	1.85396	1.11731	3.07628
Inverse variance weighted	4	0.009829	1.71235	1.1383	2.57588
Urate levels
method	nsnp	pval	or	or_lci95	or_uci95
MR Egger	14	0.272978	1.63736	0.706029	3.79721
Weighted median	14	0.094664	1.42789	0.940324	2.16825
Inverse variance weighted	14	0.034966	1.50382	1.0292	2.19732
3-aminoisobutyrate levels
method	nsnp	pval	or	or_lci95	or_uci95
MR Egger	26	0.083762	1.21876	0.983064	1.51097
Weighted median	26	0.080827	1.15871	0.982099	1.36708
Inverse variance weighted	26	0.047291	1.13742	1.00154	1.29173
Cys-gly, oxidized levels
method	nsnp	pval	or	or_lci95	or_uci95
MR Egger	23	0.443287	1.18725	0.77191	1.82607
Weighted median	23	0.194973	1.16308	0.925521	1.4616
Inverse variance weighted	23	0.047423	1.18792	1.00196	1.40839
Beta-hydroxyisovalerate levels
method	nsnp	pval	or	or_lci95	or_uci95
MR Egger	5	0.360221	1.81276	0.614281	5.34951
Weighted median	5	0.145316	1.41881	0.886033	2.27193
Inverse variance weighted	5	0.039712	1.51797	1.01982	2.25944
Methylsuccinate levels
method	nsnp	pval	or	or_lci95	or_uci95
MR Egger	12	0.365405	0.779113	0.465069	1.30522
Weighted median	12	0.04557	0.743674	0.556284	0.994188
Inverse variance weighted	12	0.008635	0.745255	0.598414	0.928128
Threonine levels
method	nsnp	pval	or	or_lci95	or_uci95
MR Egger	4	0.831112	1.4319	0.078496	26.1202
Weighted median	4	0.0743531	0.539463	0.273874	1.0626
Inverse variance weighted	4	0.0294159	0.535012	0.30472	0.939347
Plasma free asparagine levels
method	nsnp	pval	or	or_lci95	or_uci95
MR Egger	12	0.026592	0.625932	0.439552	0.891342
Weighted median	12	0.008304	0.707587	0.547305	0.914808
Inverse variance weighted	12	0.001564	0.726217	0.595609	0.885466
X-11381 levels
method	nsnp	pval	or	or_lci95	or_uci95
MR Egger	12	0.684496	1.20196	0.50775	2.84531
Weighted median	12	0.0710639	1.49565	0.966038	2.31561
Inverse variance weighted	12	0.00757967	1.54959	1.12356	2.13718
X-23739 levels
method	nsnp	pval	or	or_lci95	or_uci95
MR Egger	8	0.105252	0.543204	0.290038	1.01735
Weighted median	8	0.006645	0.581691	0.393338	0.860239
Inverse variance weighted	8	0.002379	0.613987	0.448229	0.841044
X-24241 levels
method	nsnp	pval	or	or_lci95	or_uci95
MR Egger	7	0.599796	1.53914	0.34003	6.96685
Weighted median	7	0.119123	1.65034	0.878907	3.09886
Inverse variance weighted	7	0.033367	1.68651	1.04204	2.72955
X-25422 levels
method	nsnp	pval	or	or_lci95	or_uci95
MR Egger	10	0.35896	1.54536	0.643172	3.71306
Weighted median	10	0.002691	1.68193	1.19765	2.36202
Inverse variance weighted	10	0.000987	1.58825	1.20607	2.09153
5-acetylamino-6-formylamino-3-methyluracil levels
method	nsnp	pval	or	or_lci95	or_uci95
MR Egger	30	0.364281	1.09538	0.902568	1.32938
Weighted median	30	0.195398	1.09895	0.952678	1.26768
Inverse variance weighted	30	0.0163516	1.13698	1.02386	1.2626
Ethylmalonate levels
method	nsnp	pval	or	or_lci95	or_uci95
MR Egger	58	0.563019	0.958655	0.831551	1.10519
Weighted median	58	0.301419	0.942232	0.841674	1.0548
Inverse variance weighted	58	0.007882	0.902237	0.836302	0.973371
Glycine levels
method	nsnp	pval	or	or_lci95	or_uci95
MR Egger	28	0.51055	1.09296	0.841762	1.41913
Weighted median	28	0.372526	1.09506	0.896929	1.33695
Inverse variance weighted	28	0.0363204	1.16256	1.00964	1.33864
Phosphate to mannose ratio
method	nsnp	pval	or	or_lci95	or_uci95
MR Egger	3	0.493743	2.18269	0.486968	9.78326
Weighted median	3	0.0506001	1.62886	0.998717	2.65659
Inverse variance weighted	3	0.0404052	1.6324	1.02165	2.60827
Glutamine to asparagine ratio
method	nsnp	pval	or	or_lci95	or_uci95
MR Egger	19	0.0423804	1.35591	1.03307	1.77965
Weighted median	19	0.0129904	1.32674	1.06146	1.65833
Inverse variance weighted	19	0.0258177	1.20054	1.0223	1.40987
Carnitine to ergothioneine ratio
method	nsnp	pval	or	or_lci95	or_uci95
MR Egger	4	0.434598	0.350325	0.042022	2.92054
Weighted median	4	0.0337195	1.77788	1.04528	3.02395
Inverse variance weighted	4	0.0446385	1.63802	1.01188	2.65162
Glycine to phosphate ratio
method	nsnp	pval	or	or_lci95	or_uci95
MR Egger	20	0.986779	1.0028	0.723657	1.38962
Weighted median	20	0.345524	1.11069	0.89302	1.38141
Inverse variance weighted	20	0.0396558	1.18412	1.00803	1.39098
Phosphate to threonine ratio
method	nsnp	pval	or	or_lci95	or_uci95
MR Egger	4	0.894463	0.806096	0.048295	13.4546
Weighted median	4	0.0995626	1.98624	0.877721	4.49475
Inverse variance weighted	4	0.0310651	2.07507	1.06869	4.02913
phosphate to asparagine ratio
method	nsnp	pval	or	or_lci95	or_uci95
MR Egger	11	0.019146	1.77007	1.19491	2.6221
Weighted median	11	0.00492999	1.50614	1.13207	2.00383
Inverse variance weighted	11	0.00106787	1.44104	1.15778	1.7936
Cysteinylglycine to taurine ratio
method	nsnp	pval	or	or_lci95	or_uci95
MR Egger	3	0.859035	1.52596	0.038505	60.473
Weighted median	3	0.0223699	1.96536	1.1006	3.50956
Inverse variance weighted	3	0.0172516	2.09599	1.13988	3.85404
Retinol (Vitamin A) to oleoyl-linoleoyl-glycerol (18:1 to 18:2) [2] ratio
method	nsnp	pval	or	or_lci95	or_uci95
MR Egger	8	0.304267	1.75117	0.658757	4.65513
Weighted median	8	0.0258457	1.72988	1.06827	2.80127
Inverse variance weighted	8	0.0238158	1.55605	1.06046	2.28323
Glucose-to-mannose ratio
method	nsnp	pval	or	or_lci95	or_uci95
MR Egger	7	0.185382	2.11352	0.812842	5.49549
Weighted median	7	0.0428547	1.43799	1.01175	2.04381
Inverse variance weighted	7	0.0247229	1.42747	1.04632	1.94746
Benzoate to oleoyl-linoleoyl-glycerol (18:1 to 18:2) [2] ratio
method	nsnp	pval	or	or_lci95	or_uci95
MR Egger	4	0.438648	2.68478	0.356907	20.1959
Weighted median	4	0.0382894	1.93708	1.03631	3.62082
Inverse variance weighted	4	0.00547571	2.15632	1.25381	3.70848
Histidine to asparagine ratio
method	nsnp	pval	or	or_lci95	or_uci95
MR Egger	12	0.032596	1.63011	1.10773	2.39884
Weighted median	12	0.004349	1.44275	1.12144	1.85611
Inverse variance weighted	12	0.001652	1.389	1.13191	1.70447
Alanine to asparagine ratio
method	nsnp	pval	or	or_lci95	or_uci95
MR Egger	12	0.321129	1.37972	0.753895	2.52507
Weighted median	12	0.004732	1.57897	1.15008	2.16779
Inverse variance weighted	12	0.006823	1.50415	1.11904	2.02179
Glucuronate to androsterone glucuronide ratio
method	nsnp	pval	or	or_lci95	or_uci95
MR Egger	9	0.426146	1.19892	0.787036	1.82634
Weighted median	9	0.316422	1.17975	0.85377	1.63018
Inverse variance weighted	9	0.032153	1.31975	1.02391	1.70107
Paraxanthine to 5-acetylamino-6-formylamino-3-methyluracil ratio
method	nsnp	pval	or	or_lci95	or_uci95
MR Egger	49	0.315168	0.933442	0.817223	1.06619
Weighted median	49	0.140665	0.913787	0.810506	1.03023
Inverse variance weighted	49	0.0160215	0.909062	0.841195	0.982405
The odds ratio (OR), confidence interval (CI), and p-value for DPF2 in Plasma metabolites
Butyrylglycine levels
method	nsnp	pval	or	or_lci95	or_uci95
MR Egger	17	0.534591	0.942065	0.783716	1.13241
Weighted median	17	0.0971424	0.904183	0.802734	1.01845
Inverse variance weighted	17	0.00985606	0.891886	0.81766	0.972852
Mannonate levels
method	nsnp	pval	or	or_lci95	or_uci95
MR Egger	17	0.859392	1.01385	0.873018	1.17739
Weighted median	17	0.155602	1.07018	0.974539	1.1752
Inverse variance weighted	17	0.0306962	1.08097	1.00727	1.16006
1-(1-enyl-palmitoyl)-2-palmitoleoyl-GPC (P-16:0/16:1) levels
method	nsnp	pval	or	or_lci95	or_uci95
MR Egger	17	0.561614	0.943562	0.778874	1.14307
Weighted median	17	0.167844	0.930051	0.838978	1.03101
Inverse variance weighted	17	0.0176417	0.898157	0.82191	0.981478
Glycosyl ceramide (d18:1/20:0, d16:1/22:0) levels
method	nsnp	pval	or	or_lci95	or_uci95
MR Egger	17	0.950352	0.994277	0.832434	1.18759
Weighted median	17	0.236559	0.938935	0.845907	1.04219
Inverse variance weighted	17	0.0196146	0.903691	0.830006	0.983917
Arachidonoylcarnitine (C20:4) levels
method	nsnp	pval	or	or_lci95	or_uci95
MR Egger	17	0.451155	0.936095	0.791882	1.10657
Weighted median	17	0.0864963	0.92184	0.839929	1.01174
Inverse variance weighted	17	0.0220272	0.914209	0.846648	0.987161
X-11381 levels
method	nsnp	pval	or	or_lci95	or_uci95
MR Egger	17	0.144462	0.882013	0.751737	1.03487
Weighted median	17	0.0557095	0.90988	0.825976	1.00231
Inverse variance weighted	17	0.0090952	0.906835	0.842587	0.975982
X-23739 levels
method	nsnp	pval	or	or_lci95	or_uci95
MR Egger	17	0.165075	1.12502	0.9604	1.31785
Weighted median	17	0.236856	1.06153	0.961529	1.17194
Inverse variance weighted	17	0.044048	1.07865	1.00202	1.16115
Glycine to phosphate ratio
method	nsnp	pval	or	or_lci95	or_uci95
MR Egger	17	0.466935	1.06177	0.907154	1.24274
Weighted median	17	0.172633	1.07267	0.969798	1.18645
Inverse variance weighted	17	0.0357089	1.08292	1.00533	1.1665
Paraxanthine to 5-acetylamino-6-formylamino-3-methyluracil ratio
method	nsnp	pval	or	or_lci95	or_uci95
MR Egger	17	0.365984	0.914977	0.759058	1.10292
Weighted median	17	0.334327	0.946918	0.847662	1.0578
Inverse variance weighted	17	0.042635	0.915474	0.840551	0.997074

## Sheet: Supplementary Table S4
Category	Term	Count	%	PValue	Genes	List Total	Pop Hits	Pop Total	Fold Enrichment	Bonferroni	Benjamini	FDR
GOTERM_BP_DIRECT	GO:0007268~chemical synaptic transmission	26	6.16114	1.34964e-11	CHRM2, CHRNA4, NRXN1, CHRNA7, SLC1A1, CHRM5, GRIK4, DBH, CACNA1G, GABRR2, CHRND, HTR6, GRM5, SV2C, HTR7, GRM7, NPY, SLITRK5, DLGAP1, SLC18A3, KCND3, HTR1B, GRIN1, HCRTR1, CACNB3, SCN2B	400	231	19416	5.46338	3.16761e-08	3.1676e-08	3.11362e-08
GOTERM_BP_DIRECT	GO:0007267~cell-cell signaling	22	5.21327	1.51564e-08	TNFSF18, FGFBP1, CCL22, EDN3, SRD5A2, FASLG, ADRA1D, LILRB2, BARX1, ADRA1B, TBX5, CXCL14, ADRA1A, TSPAN32, FGF5, IL3, LHX1, GRAP2, LTA, GJA8, CD33, SIGLEC6	400	232	19416	4.60293	3.55715e-05	1.77861e-05	1.74829e-05
GOTERM_BP_DIRECT	GO:0019373~epoxygenase P450 pathway	8	1.89573	9.03805e-08	CYP2C9, CYP2C8, CYP2A6, CYP2B6, CYP2A13, CYP1A2, CYP4A11, CYP2C19	400	20	19416	19.416	0.0002121	7.07077e-05	6.95026e-05
GOTERM_BP_DIRECT	GO:0042178~xenobiotic catabolic process	8	1.89573	2.70991e-07	CYP2C9, CYP2C8, CYP2A6, CYP2B6, CYP1A2, NR1I2, CYP2C19, CYP3A4	400	23	19416	16.8835	0.000635814	0.000159004	0.000156294
GOTERM_BP_DIRECT	GO:0071276~cellular response to cadmium ion	9	2.1327	4.29362e-07	MT2A, MT1M, CYP1A2, MT1F, MT1G, MT1H, MT1X, FOS, MT1E	400	35	19416	12.4817	0.001007	0.000165334	0.000162516
GOTERM_BP_DIRECT	GO:0010273~detoxification of copper ion	7	1.65877	4.87996e-07	MT2A, MT1M, MT1F, MT1G, MT1H, MT1X, MT1E	400	16	19416	21.2362	0.001145	0.000165334	0.000162516
GOTERM_BP_DIRECT	GO:0008202~steroid metabolic process	10	2.36967	4.93112e-07	CYP2C9, CYP2C8, CYP2A6, CYP2B6, CYP3A43, NR1I2, RDH16, RDH5, CYP2C19, CYP3A4	400	48	19416	10.1125	0.001157	0.000165334	0.000162516
GOTERM_BP_DIRECT	GO:0006805~xenobiotic metabolic process	14	3.31754	1.04569e-06	SLC22A1, NR1I2, GLYAT, CYP3A4, CYP2C19, SULT1B1, CYP2C9, CYP2A6, CYP2C8, CYP2B6, CYP2A13, NAT2, CYP1A2, S100A12	400	119	19416	5.71059	0.002451	0.000284892	0.000280037
GOTERM_BP_DIRECT	GO:0045926~negative regulation of growth	7	1.65877	1.09247e-06	MT2A, MT1M, MT1F, MT1G, MT1H, MT1X, MT1E	400	18	19416	18.8767	0.002561	0.000284892	0.000280037
GOTERM_BP_DIRECT	GO:0007188~adenylate cyclase-modulating G protein-coupled receptor signaling pathway	10	2.36967	1.64665e-06	GNAO1, CHRM2, GNA14, HTR6, VIPR1, ADRB3, GCGR, GLP2R, ADRA1D, ADRA1B	400	55	19416	8.82545	0.003857	0.000386469	0.000379883
GOTERM_BP_DIRECT	GO:0006956~complement activation	8	1.89573	1.98746e-06	FCN3, C6, C7, C1S, CFHR4, C9, C8B, C8A	400	30	19416	12.944	0.004654	0.000424053	0.000416826
GOTERM_BP_DIRECT	GO:0006958~complement activation, classical pathway	9	2.1327	3.90693e-06	C6, C7, C1S, C1R, C9, C1RL, MASP2, C8B, C8A	400	46	19416	9.49696	0.009128	0.0007273	0.000714904
GOTERM_BP_DIRECT	GO:0042531~positive regulation of tyrosine phosphorylation of STAT protein	10	2.36967	4.0285e-06	GH2, GHR, TNFSF18, IL3, HPX, FLT3, IL23A, IL13, FYN, IGF1	400	61	19416	7.95738	0.00941	0.0007273	0.000714904
GOTERM_BP_DIRECT	GO:0002764~immune response-regulating signaling pathway	10	2.36967	5.30252e-06	NCR1, KIR2DS1, KIR2DS3, KIR3DL1, LILRB2, LILRA2, KIR2DL3, LILRB5, KIR2DL5A, LILRA5	400	63	19416	7.70476	0.012368	0.00088893	0.00087378
GOTERM_BP_DIRECT	GO:0071294~cellular response to zinc ion	7	1.65877	7.13464e-06	MT2A, MT1M, MT1F, MT1G, MT1H, MT1X, MT1E	400	24	19416	14.1575	0.0166057	0.00107489	0.001057
GOTERM_BP_DIRECT	GO:0006882~intracellular zinc ion homeostasis	8	1.89573	7.32773e-06	MT2A, MT1M, SLC1A1, MT1F, MT1G, MT1H, MT1X, MT1E	400	36	19416	10.7867	0.0170512	0.00107489	0.001057
GOTERM_BP_DIRECT	GO:0071280~cellular response to copper ion	7	1.65877	9.22575e-06	MT2A, MT1M, MT1F, MT1G, MT1H, MT1X, MT1E	400	25	19416	13.5912	0.0214202	0.0012737	0.001252
GOTERM_BP_DIRECT	GO:0007204~positive regulation of cytosolic calcium ion concentration	14	3.31754	1.03079e-05	GLP1R, GPR15, PTGER1, PTGER2, PTGER3, ADRA1D, CACNA1C, TRPV1, TACR1, ADRA1B, ESR1, ADRA1A, TBXA2R, PTGDR	400	146	19416	4.65452	0.023902	0.00134403	0.001321
GOTERM_BP_DIRECT	GO:0007187~G protein-coupled receptor signaling pathway, coupled to cyclic nucleotide second messenger	9	2.1327	1.3498e-05	CHRM2, HTR6, VIPR1, HTR7, ADRB3, NPY, MC5R, CHRM5, HTR1B	400	54	19416	8.09	0.031184	0.00166736	0.001639
GOTERM_BP_DIRECT	GO:0019221~cytokine-mediated signaling pathway	14	3.31754	1.83202e-05	IFNA5, IFNA6, FLT3, SLC1A1, LIFR, IRAK3, LILRB5, LILRA5, GHR, IL1A, IL12B, JAK3, IL9R, CRLF2	400	154	19416	4.41273	0.042087	0.00208274	0.002047
Category	Term	Count	%	PValue	Genes	List Total	Pop Hits	Pop Total	Fold Enrichment	Bonferroni	Benjamini	FDR
GOTERM_CC_DIRECT	GO:0005886~plasma membrane	182	43.128	1.63825e-14	CHRM2, KCNG1, VIPR1, CLEC4M, ITGA2B, CHRM5, IRS4, SLC4A4, GRIP1, HTR6, HTR7, GRAP2, AKT2, GJA8, HLA-DOA, LZTS1, EPHB1, RGS6, PTGDR, EPHA5, SEMA6C, ZGPAT, DSCAM, KCNH6, SLC6A13, PSG3, LIFR, ANXA10, ANK1, SYTL2, SLC9A2, LTB4R2, MIP, IGFALS, SLC27A5, CHRNA3, CHRNA4, GYPB, CHRNA7, SLC1A1, SLC22A1, ALOX15, PLA2G3, CACNA1C, CD1D, CYP2C19, KIR2DL3, CACNA1G, NEU3, C6, C7, TBXA2R, C9, S100A12, TSPAN2, KCN…	411	5534	20666	1.65366	5.94813e-12	5.93048e-12	5.63559e-12
GOTERM_CC_DIRECT	GO:0005615~extracellular space	81	19.1943	5.7004e-10	CRISP1, SERPINA2, IFNA5, FCN3, ECM1, IFNA6, FASLG, DBH, C8B, CXCL14, C8A, CXCL2, GHR, FGF5, PRB4, RS1, CRHBP, MMP25, SMR3B, PRB1, BMPER, MMP26, C1RL, IL12B, CA6, HGFAC, FGB, IL11, FGFBP1, EDN3, IL13, KRT31, KMO, DCN, IL1A, F9, LTA, MASP2, IGFALS, CEACAM8, ZG16, PNLIP, IL9R, SERPINB10, KRT81, APCS, TNXB, C1S, C1R, CD5L, PROZ, PLA2G3, LCAT, CD1D, LILRA5, HPX, C6, C7, C9, NPY, SLIT1, APOF, CD14, SPT…	411	1986	20666	2.05079	2.06355e-07	1.03177e-07	9.8047e-08
GOTERM_CC_DIRECT	GO:0045211~postsynaptic membrane	21	4.9763	1.10862e-08	CHRM2, GRID2, CHRNA3, KCNC1, KCNC2, KCND3, CHRNA4, ITGB3, CHRNA7, CHRM5, TRPV1, TACR1, ANK1, SLC6A4, GRIN1, GNAO1, GRIP1, GABRR2, CHRND, GRM7, GRIA3	411	214	20666	4.93424	4.01318e-06	1.33773e-06	1.27121e-06
GOTERM_CC_DIRECT	GO:0009897~external side of plasma membrane	29	6.87204	2.34101e-08	FCN3, CLEC4M, CHRNA4, ITGB3, ITGA2B, SLC1A1, STAB2, FASLG, CD1D, GHR, NEU3, RS1, IL12B, CEACAM21, CD14, CD33, FGB, EPHA5, GPR15, MOG, TNFRSF9, IL13, LIFR, TRPV1, SELE, CD28, CD22, IL9R, CRLF2	411	418	20666	3.48848	8.47441e-06	2.11861e-06	2.01327e-06
GOTERM_CC_DIRECT	GO:0005576~extracellular region	81	19.1943	1.42785e-07	IFNA5, FCN3, ECM1, IFNA6, CLEC4M, DMP1, FASLG, DBH, C8B, C8A, CXCL2, GHR, FGF5, PRB4, CRHBP, PRB1, BMPER, ADAMTSL2, IL12B, CA6, ADAMTS8, EPHB1, HGFAC, FGB, IL11, FGFBP1, DSCAM, EDN3, IL13, MEPE, PSG3, ELSPBP1, DCN, IL1A, F9, IL23A, GFOD2, LPAL2, MASP2, IGFALS, DNASE1L3, PNLIP, APCS, ITIH4, TNXB, C1S, HHLA1, C1R, CD5L, PLA2G3, LCAT, LILRA2, ABO, PSORS1C2, LILRA5, HPX, C6, C7, C9, NPVF, NPY, SLIT1,…	411	2248	20666	1.81177	5.16867e-05	1.03376e-05	9.82358e-06
GOTERM_CC_DIRECT	GO:0005579~membrane attack complex	5	1.18483	1.00337e-05	C6, C7, C9, C8B, C8A	411	8	20666	31.4264	0.003626	0.000552769	0.000525283
GOTERM_CC_DIRECT	GO:0009986~cell surface	32	7.58294	1.06889e-05	KCNC1, NRXN1, ITGB3, ITGA2B, CD5L, SLC1A1, CD1D, SLC4A4, TSPAN32, LILRA5, GHR, ITGB8, KCNN2, CACNG2, CLEC1B, CD33, FGB, TNFSF18, SEMA6C, FGFBP1, DCC, ELSPBP1, PSG3, TACR1, LILRB2, GRIN1, AJAP1, CEACAM3, IL1A, CD28, CEACAM8, CD22	411	665	20666	2.4196	0.003862	0.000552769	0.000525283
GOTERM_CC_DIRECT	GO:0045202~synapse	27	6.3981	4.29208e-05	CHRM2, CHRNA3, KCNC2, CHRNA4, ITGB3, CHRNA7, SLC1A1, CHRM5, DBH, CPLX2, SLC6A4, CACNA1G, GABRR2, CHRND, HTR6, HTR7, SLITRK5, FGB, GRID2, DSCAM, HTR1B, MYO9A, GRIN1, HCRTR1, SDK1, CACNB3, SCN2B	411	549	20666	2.4729	0.0154176	0.001942	0.001846
GOTERM_CC_DIRECT	GO:0030425~dendrite	24	5.6872	6.21124e-05	CHRM2, EPHA5, CHRNA3, DSCAM, KCNC2, CHRNA4, SLC1A1, CHRM5, HTR1B, CACNA1C, TACR1, CPLX2, GRIN1, GNAO1, GRIP1, CRHBP, HTR6, GRM5, NIN, HTR7, GRM7, FYN, CNGA3, EPHB1	411	465	20666	2.59521	0.022234	0.002498	0.002374
GOTERM_CC_DIRECT	GO:0098839~postsynaptic density membrane	11	2.60664	0.00015132	GRM5, GRID2, PTPRS, DCC, GRIK5, SLITRK5, GRIK4, CACNA1C, CACNG2, GRIA3, GRIN1	411	121	20666	4.57111	0.053309	0.005478	0.005205
GOTERM_CC_DIRECT	GO:0042734~presynaptic membrane	12	2.8436	0.000184362	GNAO1, CHRM2, PTPRS, KCNC1, KCNC2, NRXN1, GRIK5, GRIK4, OTOF, HTR1B, ATP2B3, SLC6A4	411	148	20666	4.07694	0.064566	0.006067	0.005766
GOTERM_CC_DIRECT	GO:0072562~blood microparticle	12	2.8436	0.000547797	FGB, ITIH4, APCS, HPX, FCN3, C1S, C1R, C9, ITGA2B, CD5L, C1RL, C8A	411	168	20666	3.59159	0.179923	0.016525	0.0157035
GOTERM_CC_DIRECT	GO:0070442~integrin alphaIIb-beta3 complex	3	0.7109	0.001162	ITGB3, ITGA2B, TSPAN32	411	3	20666	50.2822	0.343649	0.03237	0.0307608
GOTERM_CC_DIRECT	GO:0043235~receptor complex	13	3.08057	0.001324	VIPR1, PTPRS, FLT3, ITGB3, LIFR, GHR, PEX5L, GRM7, ADRB3, SLITRK5, IL12B, ITGB8, CRLF2	411	216	20666	3.02625	0.381078	0.034247	0.032544
GOTERM_CC_DIRECT	GO:0043204~perikaryon	11	2.60664	0.001443	CRHBP, GRIP1, PTPRS, KCNC2, SLC1A1, FYN, CNGA3, CACNA1C, CPLX2, NEUROG1, ASS1	411	161	20666	3.43543	0.407149	0.034829	0.033097
GOTERM_CC_DIRECT	GO:0098688~parallel fiber to Purkinje cell synapse	5	1.18483	0.001866	GNAO1, GRID2, ATP2B3, GRIA3, SPTBN2	411	27	20666	9.31153	0.491484	0.042227	0.040127
GOTERM_CC_DIRECT	GO:0043231~intracellular membrane-bounded organelle	32	7.58294	0.003216	TNXB, PRDM14, ALOX12B, DBH, CYP2C19, CYP3A4, ADRA1A, GLI3, HSD11B1, NEU3, CYP2B6, CYP2A13, AKT2, RDH16, AP4S1, HAO1, RGS6, SPTBN2, OSBPL7, KSR1, HSD3B2, CYP4A11, ATP2B3, TYR, EPN3, CYP39A1, CYP2C9, CYP2A6, CYP2C8, CYP1A2, RDH5, FOSB	411	924	20666	1.74138	0.688449	0.068489	0.065084
GOTERM_CC_DIRECT	GO:0005892~acetylcholine-gated channel complex	4	0.947867	0.004286	CHRND, CHRNA3, CHRNA4, CHRNA7	411	17	20666	11.8311	0.788786	0.086197	0.081911
GOTERM_CC_DIRECT	GO:0031012~extracellular matrix	12	2.8436	0.00604	MMP25, ECM1, TNXB, LRRN3, BMPER, MMP26, ADAMTSL2, GFOD2, MEPE, DMP1, IGFALS, ADAMTS8	411	228	20666	2.64643	0.888449	0.109711	0.104256
GOTERM_CC_DIRECT	GO:0098982~GABA-ergic synapse	8	1.89573	0.006061	GNAO1, GABRR2, KCNC2, KCND3, NRXN1, NPY, ATP2B3, TRPV1	411	109	20666	3.69044	0.889296	0.109711	0.104256
Category	Term	Count	%	PValue	Genes	List Total	Pop Hits	Pop Total	Fold Enrichment	Bonferroni	Benjamini	FDR
GOTERM_MF_DIRECT	GO:0070330~aromatase activity	10	2.36967	9.0503e-09	CYP2C9, CYP2C8, CYP2B6, CYP2A13, CYP3A43, CYP1A2, CYP4A11, CYP4F8, CYP2C19, CYP3A4	401	31	19208	15.4517	7.51172e-06	7.51175e-06	7.35789e-06
GOTERM_MF_DIRECT	GO:0004497~monooxygenase activity	13	3.08057	2.38661e-08	CYP4A11, CYP3A43, CYP3A4, CYP4F8, KMO, CYP2C19, CYP39A1, CYP2C9, CYP2A6, CYP2C8, CYP2B6, CYP2A13, CYP1A2	401	71	19208	8.77047	1.98087e-05	8.14619e-06	7.97934e-06
GOTERM_MF_DIRECT	GO:0016712~oxidoreductase activity, acting on paired donors, with incorporation or reduction of molecular oxygen, reduced flavin or flavoprotein as one donor, and incorporation of one atom of oxygen	10	2.36967	2.94441e-08	CYP2C9, CYP2C8, CYP2A6, CYP2B6, CYP2A13, CYP3A43, CYP1A2, CYP4F8, CYP2C19, CYP3A4	401	35	19208	13.6858	2.44383e-05	8.14619e-06	7.97934e-06
GOTERM_MF_DIRECT	GO:0005506~iron ion binding	16	3.79147	3.75534e-07	HAAO, CYP4A11, CYP3A43, ALOX15, ALOX12B, CYP3A4, CYP4F8, CYP2C19, CYP39A1, CYP2C9, CYP2A6, CYP2C8, CYP2B6, CYP2A13, CYP1A2, PPEF1	401	145	19208	5.28554	0.000311645	7.79234e-05	7.63274e-05
GOTERM_MF_DIRECT	GO:0008392~arachidonate epoxygenase activity	7	1.65877	8.00571e-07	CYP2C9, CYP2C8, CYP2A6, CYP2B6, CYP2A13, CYP4A11, CYP2C19	401	17	19208	19.7236	0.000664254	0.000132895	0.000130173
GOTERM_MF_DIRECT	GO:0016705~oxidoreductase activity, acting on paired donors, with incorporation or reduction of molecular oxygen	10	2.36967	3.36998e-06	CYP39A1, CYP2C9, CYP2C8, CYP2A6, CYP2B6, CYP3A43, CYP4A11, CYP4F8, CYP2C19, CYP3A4	401	59	19208	8.11869	0.002793	0.000466181	0.000456633
GOTERM_MF_DIRECT	GO:0020037~heme binding	14	3.31754	2.41178e-05	GUCY1A2, CYP4A11, CYP3A43, CYP3A4, CYP4F8, CYP2C19, CYP39A1, CYP2C9, CYP2A6, CYP2C8, CYP2B6, CYP2A13, CYP1A2, NOX5	401	156	19208	4.29874	0.019819	0.00286	0.002801
GOTERM_MF_DIRECT	GO:0034875~caffeine oxidase activity	4	0.947867	3.5303e-05	CYP2C9, CYP2C8, CYP1A2, CYP3A4	401	4	19208	47.9002	0.028877	0.003663	0.003588
GOTERM_MF_DIRECT	GO:0101020~estrogen 16-alpha-hydroxylase activity	4	0.947867	0.000464371	CYP2C8, CYP3A43, CYP1A2, CYP3A4	401	8	19208	23.9501	0.319901	0.042825	0.041948
GOTERM_MF_DIRECT	GO:0004888~transmembrane signaling receptor activity	13	3.08057	0.000685617	GLP1R, KIR2DS1, CHRNA4, DCC, NRXN1, CHRNA7, TRPV1, SELE, LILRB5, CHRND, OR52A1, CLEC1B, SIGLEC8	401	191	19208	3.26023	0.434054	0.056906	0.055741
GOTERM_MF_DIRECT	GO:0015276~ligand-gated monoatomic ion channel activity	5	1.18483	0.001007	CHRNA3, GRID2, CHRNA4, CNGA3, GRIN1	401	22	19208	10.8864	0.566501	0.060219	0.058986
GOTERM_MF_DIRECT	GO:0004993~G protein-coupled serotonin receptor activity	5	1.18483	0.001007	CHRM2, HTR6, HTR7, CHRM5, HTR1B	401	22	19208	10.8864	0.566501	0.060219	0.058986
GOTERM_MF_DIRECT	GO:0033691~sialic acid binding	5	1.18483	0.001007	SIGLEC8, SELE, CD33, SIGLEC6, CD22	401	22	19208	10.8864	0.566501	0.060219	0.058986
GOTERM_MF_DIRECT	GO:0017046~peptide hormone binding	6	1.4218	0.001228	GHR, GLP1R, VIPR1, GCGR, GLP2R, HCRTR1	401	39	19208	7.36927	0.639329	0.060219	0.058986
GOTERM_MF_DIRECT	GO:0004967~glucagon receptor activity	3	0.7109	0.00128	GLP1R, GCGR, GLP2R	401	3	19208	47.9002	0.654577	0.060219	0.058986
GOTERM_MF_DIRECT	GO:0004937~alpha1-adrenergic receptor activity	3	0.7109	0.00128	ADRA1D, ADRA1B, ADRA1A	401	3	19208	47.9002	0.654577	0.060219	0.058986
GOTERM_MF_DIRECT	GO:0042166~acetylcholine binding	4	0.947867	0.001306	CHRND, CHRNA3, CHRNA4, CHRNA7	401	11	19208	17.4183	0.66198	0.060219	0.058986
GOTERM_MF_DIRECT	GO:0032396~inhibitory MHC class I receptor activity	4	0.947867	0.001306	LILRB2, LILRA2, LILRB5, LILRA5	401	11	19208	17.4183	0.66198	0.060219	0.058986
GOTERM_MF_DIRECT	GO:0005230~extracellular ligand-gated monoatomic ion channel activity	5	1.18483	0.001926	CHRND, GABRR2, CHRNA4, CHRNA7, TRPV1	401	26	19208	9.21159	0.798203	0.084155	0.082432
GOTERM_MF_DIRECT	GO:1904315~transmitter-gated monoatomic ion channel activity involved in regulation of postsynaptic membrane potential	6	1.4218	0.002128	CHRND, GABRR2, GRID2, GRIK5, GRIK4, GRIA3	401	44	19208	6.53185	0.829282	0.088293	0.086485
Category	Term	Count	%	PValue	Genes	List Total	Pop Hits	Pop Total	Fold Enrichment	Bonferroni	Benjamini	FDR
KEGG_PATHWAY	hsa04080:Neuroactive ligand-receptor interaction	43	10.1896	6.02712e-14	CHRM2, GLP1R, VIPR1, CHRNA3, PTGER1, CHRNA4, GRIK5, PTGER2, CHRNA7, PTGER3, CHRM5, GRIK4, ADRA1D, ADRA1B, ADRA1A, GHR, GABRR2, CHRND, HTR6, GRM5, HTR7, GRM7, TBXA2R, NPVF, NPY, GNRHR, GRIA3, PTGDR, GRID2, EDN3, GCGR, GLP2R, HTR1B, TRPV1, TACR1, NMBR, GRIN1, HCRTR1, GH2, ADRB3, LTB4R2, MC5R, GNRH2	271	368	8865	3.82235	1.73018e-11	1.72978e-11	1.59719e-11
[truncated: 19 more rows]

## Sheet: Supplementary Table S5
ID	GSM363051	GSM363076	GSM363010	GSM363099	GSM362972	GSM363073	GSM363122	GSM363035	GSM363121	GSM362959	GSM363098	GSM362964	GSM363142	GSM363145	GSM712534	GSM363294	GSM363143	GSM363313	GSM363312	GSM362977	GSM363034	GSM363310	GSM363186	GSM363166	GSM363315	GSM363314	GSM363273	GSM363039	GSM363335	GSM363176	GSM363105	GSM363272	GSM363009	GSM363293	GSM363291	GSM363358	GSM363243	GSM363275	GSM363267	GSM363084	GSM363330	GSM363196	GSM362971	GSM362987	GSM363205	GSM362965	GSM363376	GSM362966	GSM363202
[truncated: 37 more rows]
[truncated: 449 more columns]
