# Supplementary material for: Crontonylation regulatory factor DPF2 promotes the occurrence of hepatocellular carcinoma by regulating glycosphingolipid metabolism
Source: Research Square preprint supplement (doi:10.21203/rs.3.rs-6627218/v1), 2025-06-02
Supplement: Supplementary file 2 [file 98ec2ebc32841e8efc7c4455.docx]

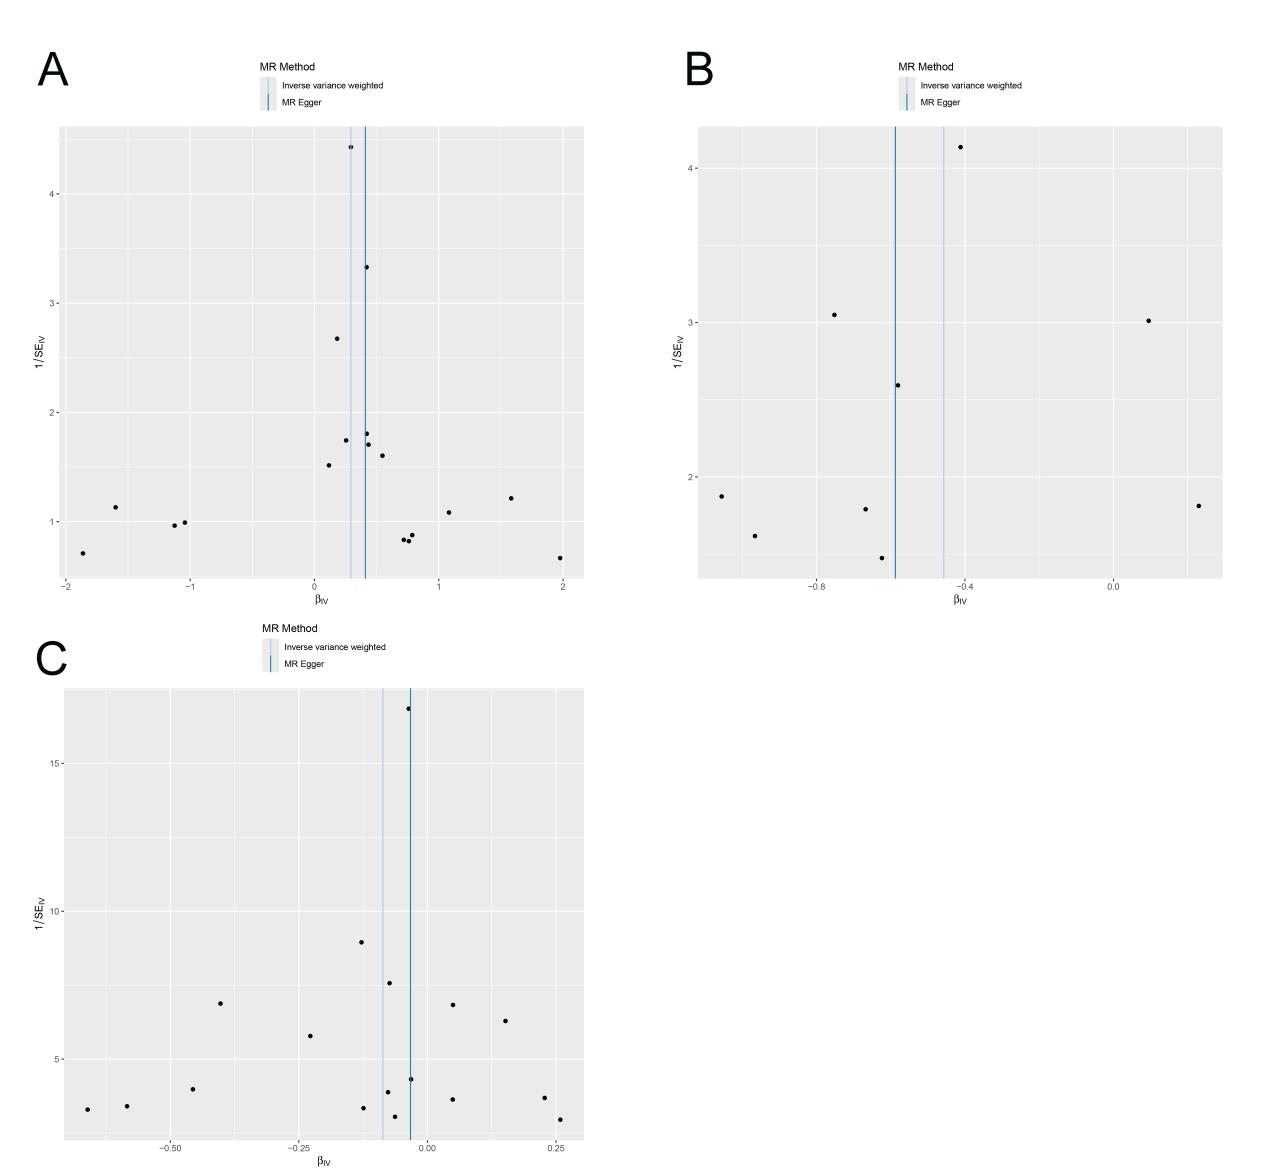


Supplementary Figure S1.Funnel plots visually display the overall heterogeneity of MR estimates for all results:(A)Heterogeneity analysis for Funnelplot for DPF2 on Finnish patients with hepatocellular carcinoma;(B)Heterogeneity analysis for Funnelplot for Glycosyl-N-behenoyl-sphingadienine (d18:2/22:0) on Finnish patients with hepatocellular carcinoma;(C)Heterogeneity analysis for DPF2 on Glycosyl-N-behenoyl-sphingadienine (d18:2/22:0) .


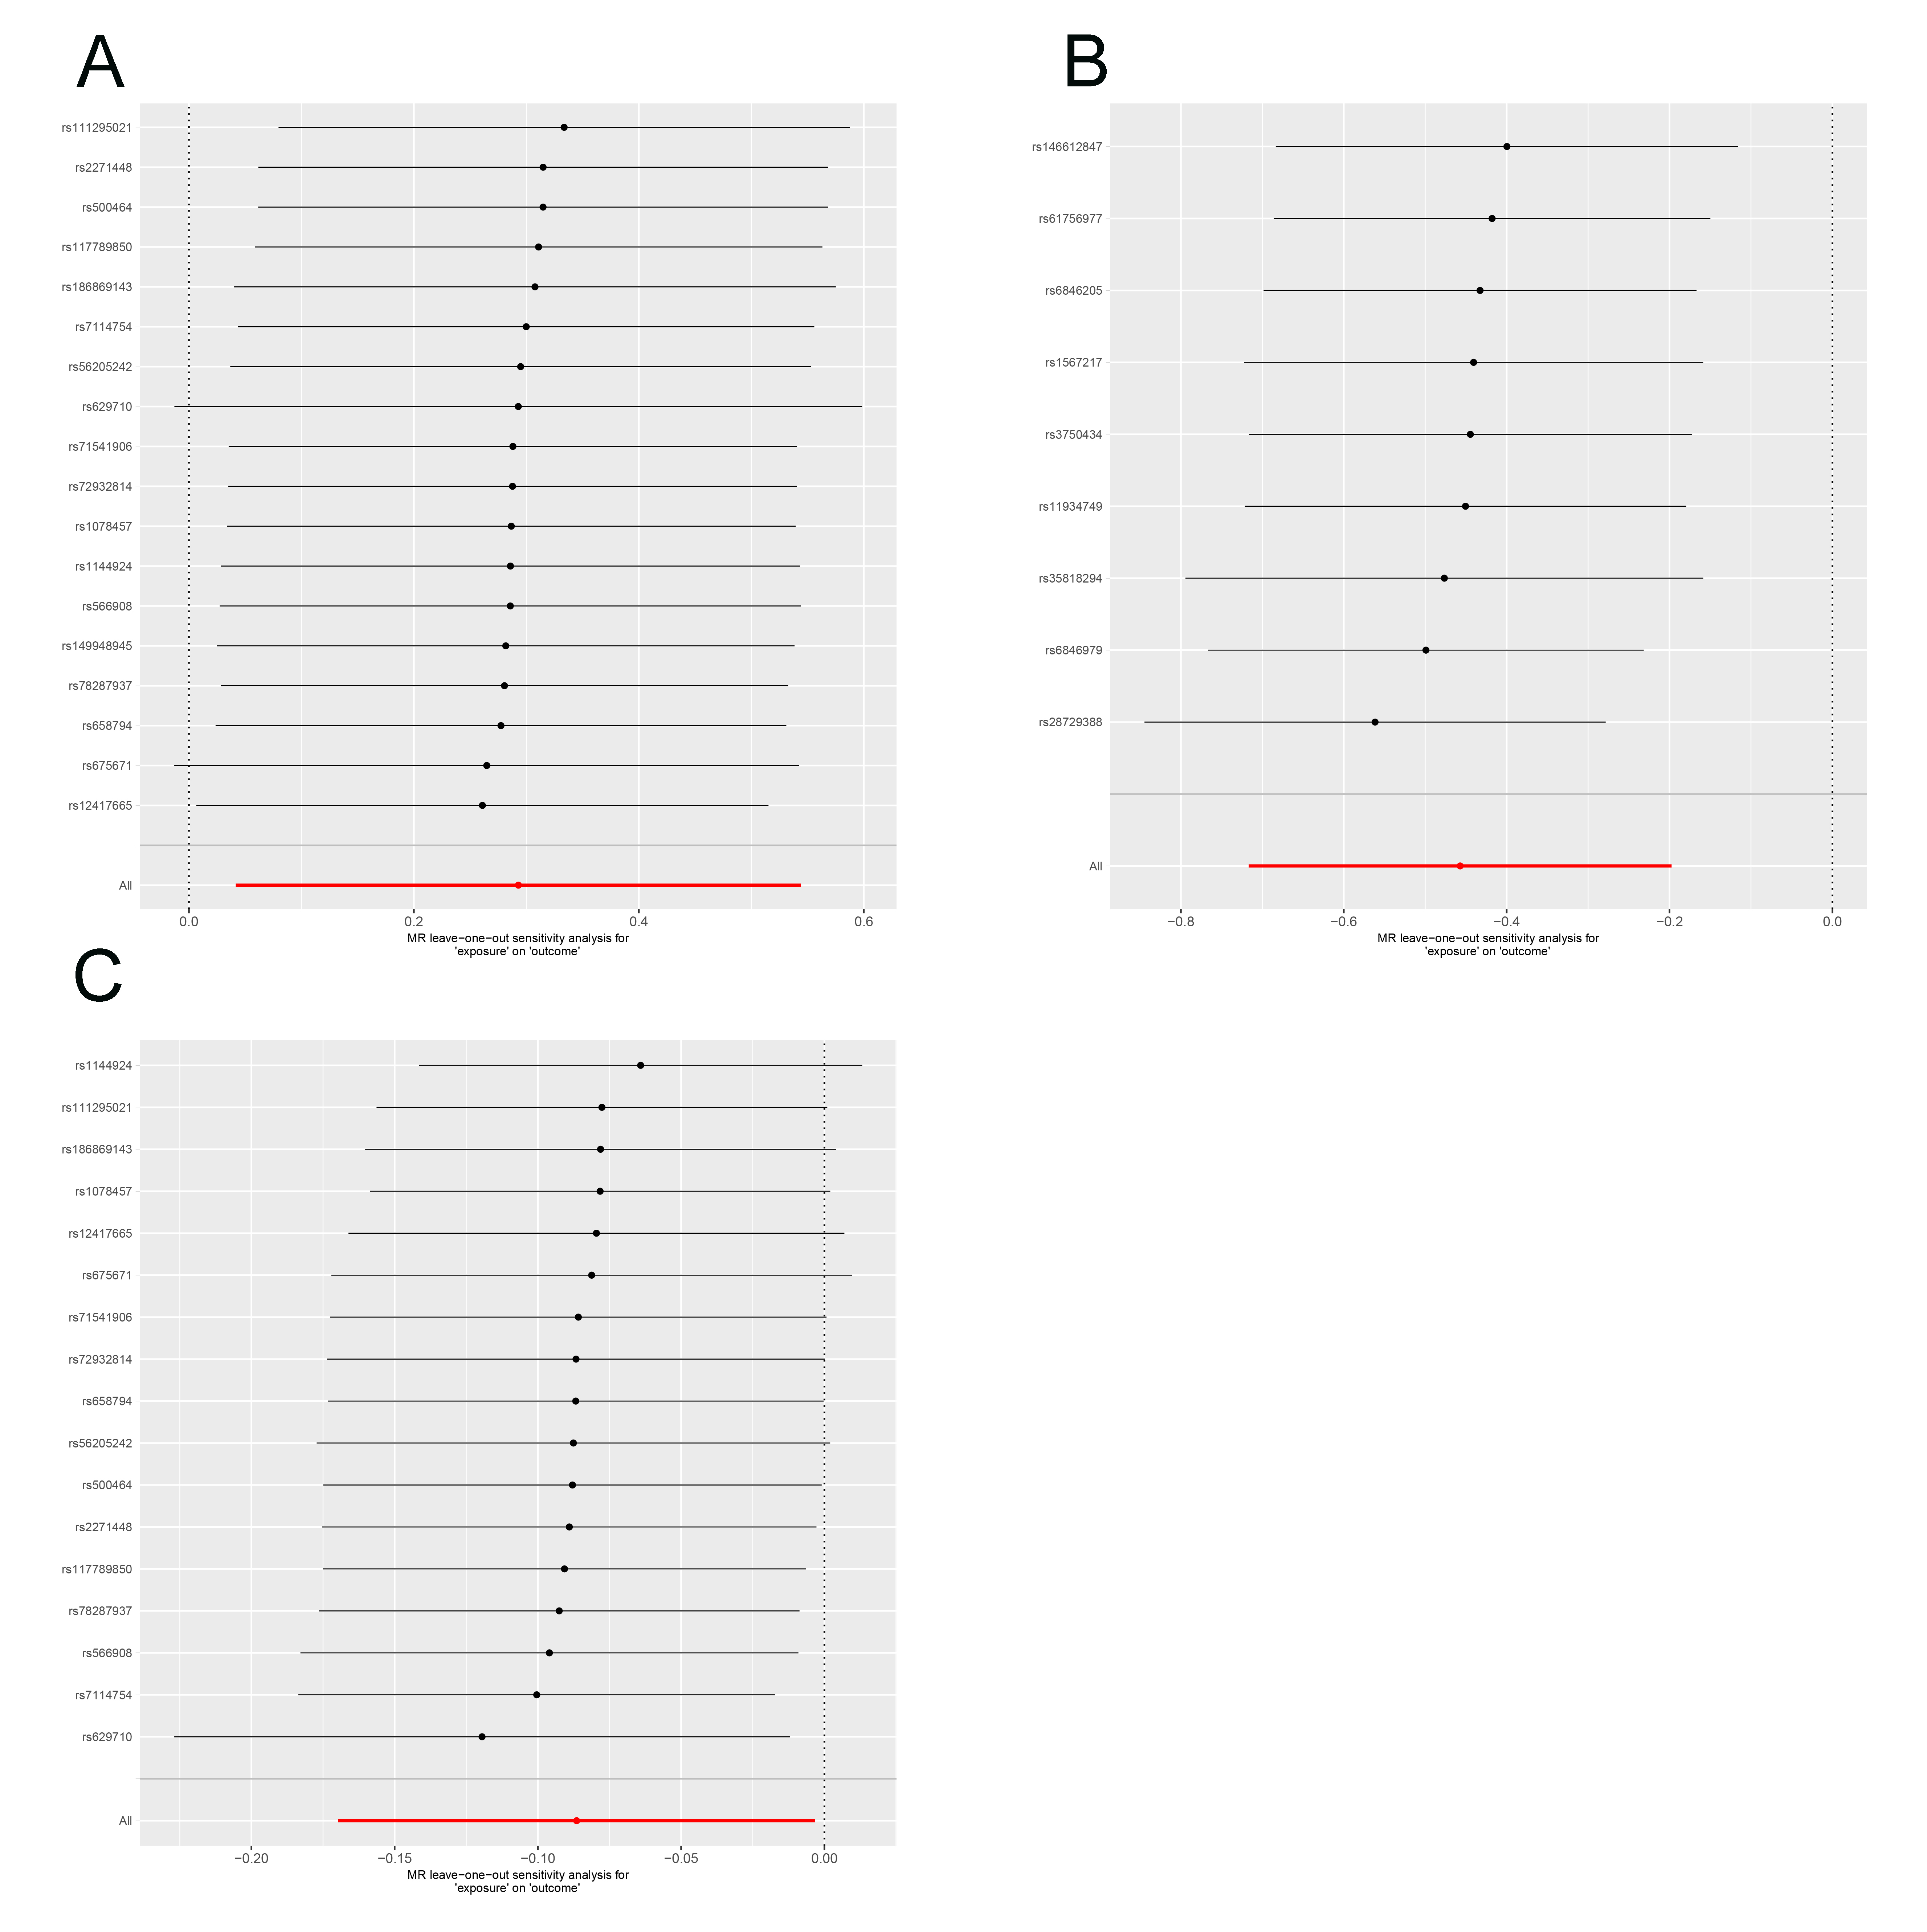


Supplementary Figure S2 Leave-one-out analysis visually displays the overall robustness of MR estimates for all results:(A)Leave-one-out analysis for DPF2 on Finnish patients with hepatocellular carcinoma;(B)Leave-one-out analysis for Glycosyl-N-behenoyl-sphingadienine (d18:2/22:0) on Finnish patients with hepatocellular carcinoma;(C)Leave-one-out analysis for DPF2 on Glycosyl-N-behenoyl-sphingadienine (d18:2/22:0).
