# Supplementary material for: Crontonylation regulatory factor DPF2 promotes the occurrence of hepatocellular carcinoma by regulating glycosphingolipid metabolism
Source: Research Square preprint supplement (doi:10.21203/rs.3.rs-6627218/v1), 2025-06-02
Supplement: Supplementary file 3 [file bed948800d516ee60e2ff39f.docx]

**STROBE-MR checklist of recommended items to address in reports of Mendelian randomization studies**12

| **Item No.** | **Section** | **Checklist item** | **Page No.** | **Relevant text from manuscript** |
| --- | --- | --- | --- | --- |
| 1 | **TITLE and ABSTRACT** | Indicate Mendelian randomization (MR) as the study’s design in the title and/or the abstract if that is a main purpose of the study | 1 |  |
|  | **INTRODUCTION** |  |  |  |
| 2 | **Background** | Explain the scientific background and rationale for the reported study. What is the exposure? Is a potential causal relationship between exposure and outcome plausible? Justify why MR is a helpful method to address the study question | 2 |  |
| 3 | **Objectives** | State specific objectives clearly, including pre-specified causal hypotheses (if any). State that MR is a method that, under specific assumptions, intends to estimate causal effects | 3 | We hypothesized that the crotonylation regulatory gene DPF2 causally affects HCC risk via modulation of plasma metabolites, particularly glycosyl–N–behenoyl–sphingadienine (d18:2/22:0). Mendelian Randomization (MR), under specific assumptions including absence of pleiotropy and confounding, was applied to estimate this causal effect. |
|  | **METHODS** |  |  |  |
| 4 | **Study design and data sources** | Present key elements of the study design early in the article. Consider including a table listing sources of data for all phases of the study. For each data source contributing to the analysis, describe the following: |  |  |
|  | a) | Setting: Describe the study design and the underlying population, if possible. Describe the setting, locations, and relevant dates, including periods of recruitment, exposure, follow-up, and data collection, when available. |  | Not applicable. |
|  | b) | Participants: Give the eligibility criteria, and the sources and methods of selection of participants. Report the sample size, and whether any power or sample size calculations were carried out prior to the main analysis | 3 | Participants were selected from the FinnGen R11 dataset based on clinical diagnosis of hepatocellular carcinoma (HCC). All participants were of European ancestry. The study included 609 HCC cases and 345,118 controls. No formal power or sample size calculations were performed prior to the analysis, as the study relied on existing publicly available GWAS datasets. |
|  | c) | Describe measurement, quality control and selection of genetic variants | 4 | Genetic variants used as instrumental variables (IVs) were selected from published genome-wide association studies (GWAS). Only single nucleotide polymorphisms (SNPs) reaching genome-wide significance (P < 5 × 10⁻⁸) were included. Linkage disequilibrium (LD) pruning was conducted using a window size of 10 Mb and r² < 0.001. LD reference was based on European ancestry samples from the 1000 Genomes Project. Quality control procedures included heterogeneity testing (Cochran’s Q), horizontal pleiotropy testing (MR-Egger intercept and MR-PRESSO), and leave-one-out sensitivity analyses to assess the robustness of the results. |
|  | d) | For each exposure, outcome, and other relevant variables, describe methods of assessment and diagnostic criteria for diseases |  | Not applicable. |
|  | e) | Provide details of ethics committee approval and participant informed consent, if relevant |  | Not applicable. |
| 5 | **Assumptions** | Explicitly state the three core IV assumptions for the main analysis (relevance, independence and exclusion restriction) as well assumptions for any additional or sensitivity analysis | 4-5 | Mendelian Randomization (MR) analysis in this study relies on the three core instrumental variable assumptions:Relevance – the genetic variants (SNPs) are robustly associated with the exposure (e.g., DPF2 expression or plasma metabolites);Independence – the selected SNPs are not associated with any confounders of the exposure-outcome relationship;Exclusion Restriction – the SNPs influence the outcome (HCC) only through the exposure and not via alternative pathways.  To address these assumptions, we implemented several sensitivity analyses. We used Cochran's Q test to assess heterogeneity among SNPs (relevance/validity of instruments), MR-Egger intercept and MR-PRESSO to test for horizontal pleiotropy (violation of the exclusion restriction assumption), and leave-one-out analysis to evaluate the robustness of each SNP’s influence. The Steiger directionality test was applied to ensure that the causal direction flows from DPF2 to HCC via metabolites, addressing the independence assumption. |
| 6 | **Statistical methods: main analysis** | Describe statistical methods and statistics used |  |  |
|  | a) | Describe how quantitative variables were handled in the analyses (i.e., scale, units, model) | 4 | All exposures, outcomes, and mediators were analyzed on a standardized scale per one standard deviation (SD) increase in the genetically predicted level of each phenotype. Causal estimates were reported as odds ratios (ORs) with 95% confidence intervals (CIs), derived from Mendelian randomization models. The primary analytical method was the inverse variance weighted (IVW) model, supplemented by MR-Egger and weighted median methods. All instrumental variables had F-statistics > 10 to ensure strength and avoid weak instrument bias. |
|  | b) | Describe how genetic variants were handled in the analyses and, if applicable, how their weights were selected | 4 | Genetic variants (SNPs) strongly associated with exposures (gut microbiota and CSF metabolites) at a genome-wide significance threshold (P < 5 × 10⁻8) were selected as instrumental variables (IVs). For reverse MR, SNPs associated with GBM were selected using P < 5 × 10⁻8.  Linkage disequilibrium (LD) clumping was applied using a 10,000 kb window and r² < 0.001 (MR) or r² < 0.05 (GSMR), based on European reference panels from the 1000 Genomes Project.  SNP weights were derived from the effect sizes (β coefficients) reported in GWAS summary statistics. Weak instruments were excluded by ensuring all IVs had F-statistics > 10. Pleiotropic SNPs were removed using the HEIDI-outlier method in GSMR. |
|  | c) | Describe the MR estimator (e.g. two-stage least squares, Wald ratio) and related statistics. Detail the included covariates and, in case of two-sample MR, whether the same covariate set was used for adjustment in the two samples | 4 | We used a two-sample MR design. The main estimator was inverse variance weighted (IVW), with MR-Egger and weighted median as sensitivity analyses. SNP-specific Wald ratios were calculated using GWAS summary statistics.  All GWAS included standard covariates (e.g., age, sex, principal components). Although individual-level data were not used, covariate adjustment was consistent across exposure and outcome datasets from European populations. |
|  | d) | Explain how missing data were addressed |  | Missing data were addressed by excluding palindromic and ambiguous SNPs during the data harmonization process. SNPs that could not be aligned consistently between the exposure and outcome datasets were removed from the analysis. If additional SNPs were missing from one of the samples, they were excluded to maintain consistency in the analyses. |
|  | e) | If applicable, indicate how multiple testing was addressed |  | To account for multiple testing, false discovery rate (FDR) correction was applied to the p-values across all Mendelian randomization analyses. |
| 7 | **Assessment of assumptions** | Describe any methods or prior knowledge used to assess the assumptions or justify their validity | 6 |  |
| 8 | **Sensitivity analyses and additional analyses** | Describe any sensitivity analyses or additional analyses performed (e.g. comparison of effect estimates from different approaches, independent replication, bias analytic techniques, validation of instruments, simulations) | 5 | To ensure the robustness of causal estimates, we conducted a series of sensitivity analyses. Cochran’s Q test was used to assess heterogeneity among instrumental variables (IVs). MR-Egger intercept and MR-PRESSO were applied to detect potential horizontal pleiotropy. Leave-one-out analyses were performed to evaluate whether any single SNP disproportionately influenced the overall causal estimates.  In addition, we conducted the Steiger directionality test to confirm that the inferred causal direction was from DPF2 to HCC via plasma metabolites, rather than in the reverse direction. All sensitivity tests supported the validity of the MR assumptions and the stability of the causal effect estimates. |
| 9 | **Software and pre-registration** |  |  |  |
|  | a) | Name statistical software and package(s), including version and settings used | 4 | All of our above analyses were conducted using "TwoSampleMR", "foreach", "gsmr2", "GSVA", "ggpubr", "survminer", "survival" and "ggplot2" from R version 4.3.1 for data visualization and analysis. |
|  | b) | State whether the study protocol and details were pre-registered (as well as when and where) |  | Not applicable. |
|  | **RESULTS** |  |  |  |
| 10 | **Descriptive data** |  |  |  |
|  | a) | Report the numbers of individuals at each stage of included studies and reasons for exclusion. Consider use of a flow diagram |  | Not applicable. |
|  | b) | Report summary statistics for phenotypic exposure(s), outcome(s), and other relevant variables (e.g. means, SDs, proportions) |  | Not applicable. |
|  | c) | If the data sources include meta-analyses of previous studies, provide the assessments of heterogeneity across these studies |  | Not applicable. |
|  | d) | For two-sample MR:  i.  Provide justification of the similarity of the genetic variant-exposure associations between the exposure and outcome samples  ii.  Provide information on the number of individuals who overlap between the exposure and outcome studies |  | This study employed a two-sample MR design. Both the exposure (DPF2 expression from eQTLGen) and outcome (hepatocellular carcinoma from FinnGen) datasets were derived from individuals of European ancestry, thereby ensuring comparable genetic architectures and reducing bias from population stratification.  There was no sample overlap between the eQTLGen and FinnGen datasets, as they originate from independent cohorts. Thus, the risk of weak instrument bias due to overlapping samples is minimal. |
| 11 | **Main results** |  |  |  |
|  | a) | Report the associations between genetic variant and exposure, and between genetic variant and outcome, preferably on an interpretable scale |  | The associations between each genetic variant and DPF2 expression (exposure), and between each variant and hepatocellular carcinoma (outcome), including effect sizes (β), standard errors, and P-values, are provided in Supplementary Table S1 and S3. These results were calculated using genome-wide significant cis-eQTLs from the eQTLGen consortium and HCC GWAS summary data from |
|  | b) | Report MR estimates of the relationship between exposure and outcome, and the measures of uncertainty from the MR analysis, on an interpretable scale, such as odds ratio or relative risk per SD difference | 5 |  |
|  | c) | If relevant, consider translating estimates of relative risk into absolute risk for a meaningful time period |  | Not applicable. |
|  | d) | Consider plots to visualize results (e.g. forest plot, scatterplot of associations between genetic variants and outcome versus between genetic variants and exposure) |  | The article has provided |
| 12 | **Assessment of assumptions** |  |  |  |
|  | a) | Report the assessment of the validity of the assumptions |  | We assessed the three core MR assumptions:  Relevance: All selected SNPs were strongly associated with exposures (P < 5×10⁻8) and had F-statistics > 10, indicating sufficient instrument strength.  Independence: GWAS studies adjusted for key confounders (e.g., age, sex, population structure).  Exclusion restriction: We tested for horizontal pleiotropy using MR-Egger intercept and MR-PRESSO, both showing no significant pleiotropy. Cochran’s Q test and leave-one-out analysis indicated no heterogeneity or outlier-driven results. |
|  | b) | Report any additional statistics (e.g., assessments of heterogeneity across genetic variants, such as *I2*, Q statistic or E-value) |  | Supplementary Figure S2 |
| 13 | **Sensitivity analyses and additional analyses** |  |  |  |
|  | a) | Report any sensitivity analyses to assess the robustness of the main results to violations of the assumptions | 5 | To assess the robustness of the MR findings and evaluate potential violations of core instrumental variable assumptions, we conducted several sensitivity analyses:  Horizontal pleiotropy was assessed using the MR-Egger intercept test and MR-PRESSO global test. Neither test indicated the presence of directional pleiotropy (P > 0.05).  Causal directionality was validated using the Steiger directionality test, confirming that the effect flows from DPF2 to HCC rather than in reverse.  Heterogeneity among SNP instruments was evaluated using Cochran’s Q statistic and funnel plots, showing no substantial heterogeneity.  To ensure the robustness of results to any single SNP, we performed a leave-one-out analysis, which demonstrated consistent effect estimates, indicating that no single variant was driving the overall association. |
|  | b) | Report results from other sensitivity analyses or additional analyses |  | Not applicable. |
|  | c) | Report any assessment of direction of causal relationship (e.g., bidirectional MR) | 5 | To validate the inferred direction of causality, we conducted the Steiger directionality test, which confirmed that the genetic instruments explained more variance in the exposure (DPF2 expression or plasma metabolite levels) than in the outcome (HCC). This supports the assumption that the causal pathway proceeds from exposure to outcome. |
|  | d) | When relevant, report and compare with estimates from non-MR analyses |  | Not applicable. |
|  | e) | Consider additional plots to visualize results (e.g., leave-one-out analyses) |  | The article has provided |
|  | **DISCUSSION** |  |  |  |
| 14 | **Key results** | Summarize key results with reference to study objectives | 4-7 |  |
| 15 | **Limitations** | Discuss limitations of the study, taking into account the validity of the IV assumptions, other sources of potential bias, and imprecision. Discuss both direction and magnitude of any potential bias and any efforts to address them | 7 |  |
| 16 | **Interpretation** |  |  |  |
|  | a) | Meaning: Give a cautious overall interpretation of results in the context of their limitations and in comparison with other studies | 5-7 | However, these results should be interpreted with caution due to several limitations. First, while Mendelian Randomization (MR) helps address confounding and reverse causality, it still depends on the validity of the instrumental variables and assumptions. Although sensitivity analyses were performed, unmeasured confounding factors may still exist. Mendelian randomization analysis is not a substitute for clinical trials because it is only a method for analyzing the causal relationship between exposure and outcome. |
|  | b) | Mechanism: Discuss underlying biological mechanisms that could drive a potential causal relationship between the investigated exposure and the outcome, and whether the gene-environment equivalence assumption is reasonable. Use causal language carefully, clarifying that IV estimates may provide causal effects only under certain assumptions | 5-7 |  |
|  | c) | Clinical relevance: Discuss whether the results have clinical or public policy relevance, and to what extent they inform effect sizes of possible interventions | 5-7 | Our findings suggest a potential causal pathway from Coprobacillus cateniformis to glioblastoma (GBM) via the CSF metabolite S-1-pyrroline-5-carboxylate. This highlights a novel gut–CSF–brain axis that may inform early diagnostic biomarker development or microbial/metabolic targets for prevention. Although the effect size of the mediation was modest (6.1%), it provides a starting point for future studies exploring microbiota-based interventions in GBM. Further clinical and experimental validation is needed before translation to practice. |
| 17 | **Generalizability** | Discuss the generalizability of the study results (a) to other populations, (b) across other exposure periods/timings, and (c) across other levels of exposure | 7 | The data for this study come from the European population, so the results apply primarily to this population. Gene frequencies and environmental factors may vary in different racial or ethnic groups, which may affect the generalisability of the results. To verify the applicability of the results to other populations, future studies should repeat this analysis in other racial or ethnic groups. |
|  | **OTHER INFORMATION** |  |  |  |
| 18 | **Funding** | Describe sources of funding and the role of funders in the present study and, if applicable, sources of funding for the databases and original study or studies on which the present study is based |  | Not applicable. |
| 19 | **Data and data sharing** | Provide the data used to perform all analyses or report where and how the data can be accessed, and reference these sources in the article. Provide the statistical code needed to reproduce the results in the article, or report whether the code is publicly accessible and if so, where | 3 |  |
| 20 | **Conflicts of Interest** | All authors should declare all potential conflicts of interest |  | The authors declare no competing interests. |

This checklist is copyrighted by the Equator Network under the Creative Commons Attribution 3.0 Unported (CC BY 3.0) license.

1. Skrivankova VW, Richmond RC, Woolf BAR, Yarmolinsky J, Davies NM, Swanson SA, et al. Strengthening the Reporting of Observational Studies in Epidemiology using Mendelian Randomization (STROBE-MR) Statement. JAMA. 2021;under review.

2. Skrivankova VW, Richmond RC, Woolf BAR, Davies NM, Swanson SA, VanderWeele TJ, et al. Strengthening the Reporting of Observational Studies in Epidemiology using Mendelian Randomisation (STROBE-MR): Explanation and Elaboration. BMJ. 2021;375:n2233.
