# Supplementary material for: Crontonylation regulatory factor DPF2 promotes the occurrence of hepatocellular carcinoma by regulating glycosphingolipid metabolism
Source: Research Square preprint supplement (doi:10.21203/rs.3.rs-6627218/v1), 2025-06-02
Supplement: Supplementary file 4 [file e01c6b79303fc891e0dfc879.docx]

Supplementary Table S1.

Characteristics of significant SNPs (P < 5 × 10⁻⁸) associated with DPF2 and plasma metabolites in relation to hepatocellular carcinoma. The table includes SNP identifiers, effect alleles, effect sizes, standard errors, and corresponding GWAS source information for each exposure-outcome association.

Supplementary Table S2: Heterogeneity and pleiotropy in MR analyses.

Supplementary Table S3.

The odds ratio (OR), 95% confidence interval (CI), and p-value from Mendelian randomization analyses assessing: (1) the causal effect of plasma metabolites on hepatocellular carcinoma, and (2) the causal effect of DPF2 on plasma metabolites.

Supplementary Table S4.

Gene Ontology (GO) enrichment analysis results for biological processes (BP) and cellular components (CC). The table includes GO terms, gene counts, enrichment p-values, fold enrichment, and multiple testing-adjusted p-values (Bonferroni, Benjamini, and FDR). Results were derived using the top differentially expressed genes associated with the study.

Supplementary Table S5.

Results of Gene Set Variation Analysis (GSVA) showing the enrichment of biological processes across samples. The table includes gene sets (biological processes), the corresponding enriched genes, GSVA enrichment scores, the correlation coefficients between GSVA scores and the target variable, as well as associated p-values for each process.
